# Supplementary material for: ATF4 licenses C/EBPβ activity in human mesenchymal stem cells primed for adipogenesis
Source: eLife journal article supplement (doi:10.7554/elife.06821), 2015-06-25

Cohen et al., Figure 1-figure supplement 2

A

| Factor            | Peaks Detected | Top Ranked Motif | p-value  | % Targets |
|-------------------|----------------|------------------|----------|-----------|
| C/EBPβ<br>(DMI -) | 37,163         |                  | 1e-11175 | 65%       |
| C/EBPβ<br>(DMI +) | 73,426         |                  | 1e-18166 | 40%       |
| GR<br>(DMI +)     | 6,526          |                  | 1e-1975  | 43%       |

B

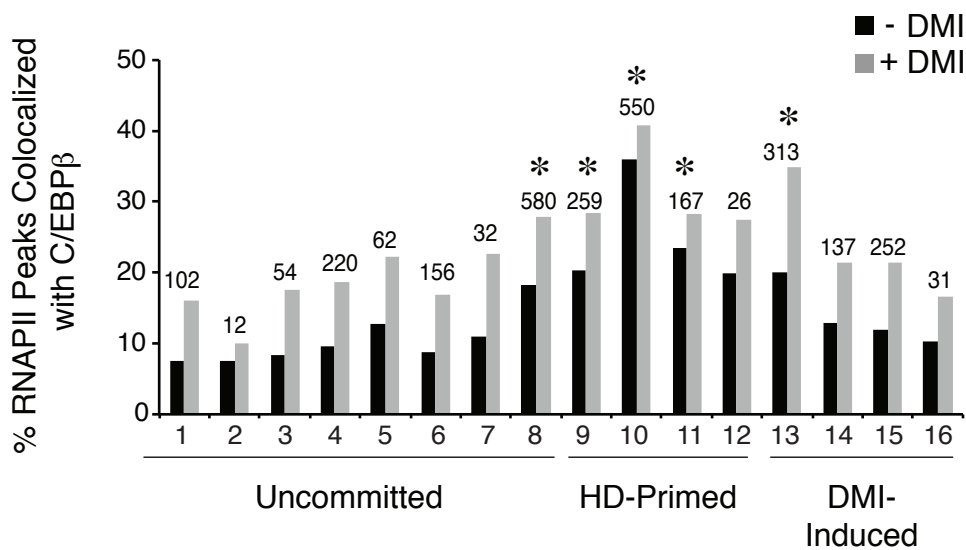

C

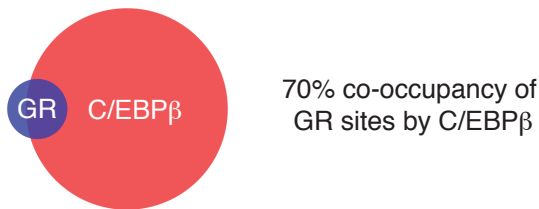

D

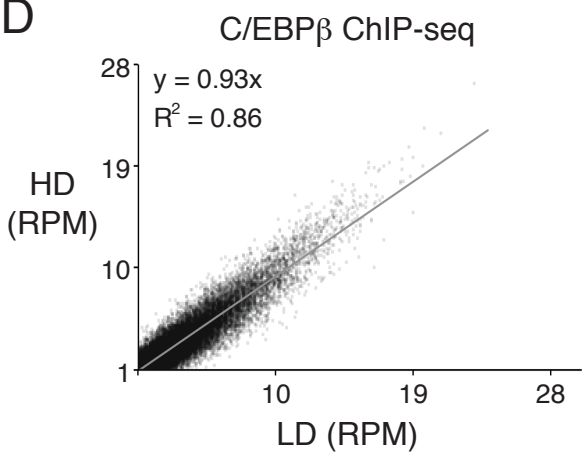

E

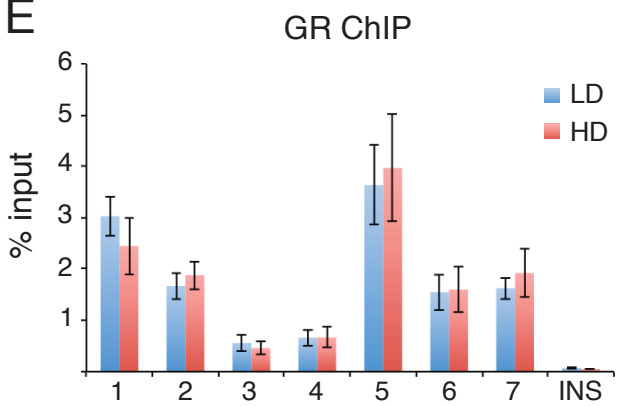

Supplement: supp [file elife-06821-supp-v2.zip]
