# Supplementary material for: ATF4 licenses C/EBPβ activity in human mesenchymal stem cells primed for adipogenesis
Source: eLife journal article supplement (doi:10.7554/elife.06821), 2015-06-25

Cohen et al., Figure 6-figure supplement 1

A

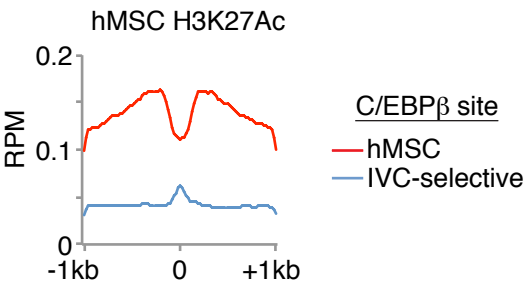

B

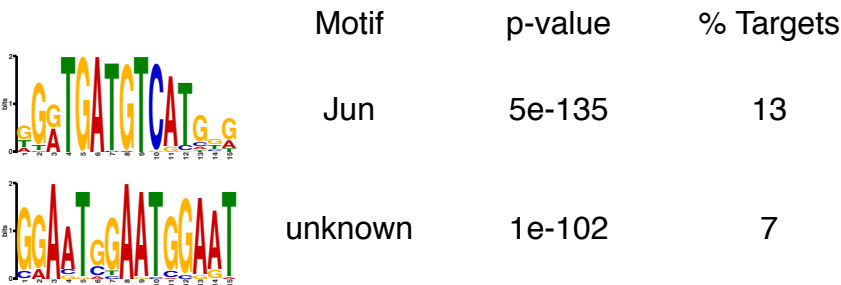

C

Blocks diagram of AP-1 motif

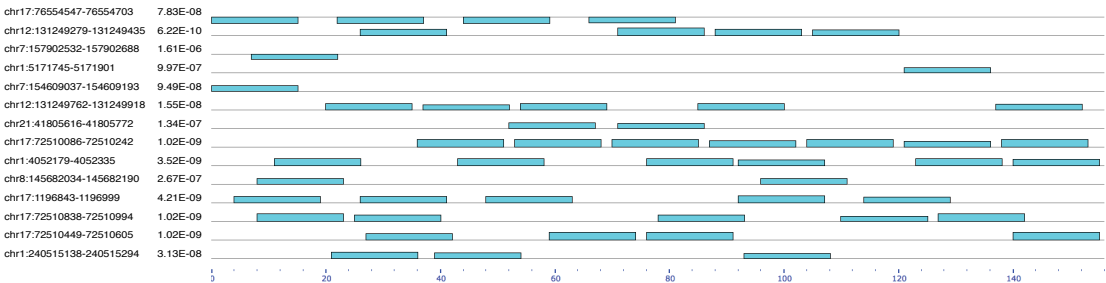

Blocks diagram of unknown motif

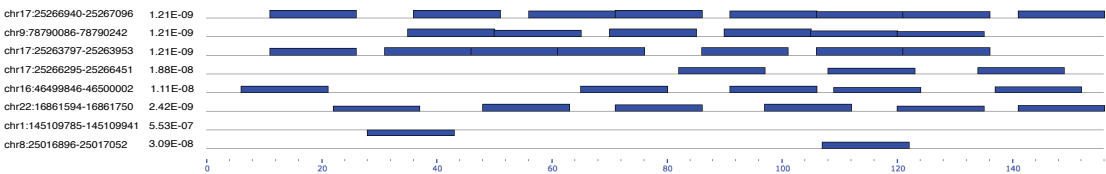

Supplement: supp [file elife-06821-supp-v2.zip]
