# Supplementary material for: ATF4 licenses C/EBPβ activity in human mesenchymal stem cells primed for adipogenesis
Source: eLife. 2015 Jun 25;4:e06821. doi: 10.7554/eLife.06821 (PMC4501333; doi:10.7554/eLife.06821)
Supplement: Supplementary file 1. — Gene Lists Associated with Gene Ontology Analysis, Related to Figure 1. RNAPII regions were mapped to nearby genes using GREAT (McLean et al., 2010). RNAPII occupancy was scored for each gene as a function of cell density and DMI treatment and genes showing correlated changes between an RNAPII peak and the entire gene locus were submitted to DAVID (Dennis et al., 2003) for Gene Ontology (GO) analysis (Panther and KEGG Pathways). Spreadsheets list RNAPII differential regions mapped to genes (‘by Enhancer’), with distance to the transcription start site (TSS), and accompanying GO Terms and RNAPII cluster designation (see Figure 1A), as well as contain summary lists of all differential regions associated with each gene (‘by Gene’), and all genes associated with each GO Term (‘by GO Term’). DOI: http://dx.doi.org/10.7554/eLife.06821.016 [file elife06821s001.xlsx]

## Sheet: by enhancer
Gene Lists Associated with Gene Ontology Analysis, Related to Figure 1
RNAPII Enhancers were mapped to nearby genes using GREAT (McLean et al., 2010). RNAPII occupancy was scored for each gene as a function of cell density and DMI treatment and genes showing correlated changes between an RNAPII enhancer and the entire gene locus were submitted to DAVID (Dennis et al., 2003) for Gene Ontology (GO) analysis (Panther and KEGG Pathways). Spreadsheets list enhancers mapp…
Locus	Gene Symbol	TSS distance	GO Terms	Gene Symbol	TSS distance	GO Terms	Cluster
chr1:1240056-1240456	ACAP3	(+3013)					1
chr1:15733695-15734095	EFHD2	(-2496)					1
chr1:16471642-16472042	EPHA2	(+10740)					1
chr1:16473180-16473580	EPHA2	(+9202)					1
chr1:26221749-26222149	STMN1	(+11044)	hsa04010:MAPK signaling pathway				1
chr1:26231691-26232091	STMN1	(+1102)	hsa04010:MAPK signaling pathway				1
chr1:27097971-27098392	ARID1A	(+75660)	BP00031:Nucleoside, nucleotide and nucleic acid metabolism				1
chr1:31883262-31883662	SERINC2	(-2501)					1
chr1:41446160-41446720	CTPS	(+1433)	hsa00240:Pyrimidine metabolism	SLFNL1	(+40987)		1
chr1:41483050-41483450	SLFNL1	(+4177)		CTPS	(+38243)	hsa00240:Pyrimidine metabolism	1
chr1:62915306-62915706	USP1	(+13531)					1
chr1:62923646-62924046	USP1	(+21871)					1
chr1:66840599-66840999	SGIP1	(-159026)		PDE4B	(+581943)	BP00031:Nucleoside, nucleotide and nucleic acid metabolism	1
chr1:66999114-66999514	SGIP1	(-511)					1
chr1:94023482-94023882	BCAR3	(+123703)					1
chr1:94125454-94125854	BCAR3	(+21731)					1
chr1:94145675-94146075	BCAR3	(+1510)					1
chr1:211834089-211834489	NEK2	(+14683)					1
chr1:212208936-212209336	DTL	(+217)					1
chr1:240411336-240411916	FMN2	(+156441)		GREM2	(+363836)		1
chr1:240437466-240437866	FMN2	(+182481)		GREM2	(+337796)		1
chr1:240445746-240446146	FMN2	(+190761)		GREM2	(+329516)		1
chr1:240515026-240515426	FMN2	(+260041)		GREM2	(+260236)		1
chr1:240585076-240585476	GREM2	(+190186)		FMN2	(+330091)		1
chr1:240672476-240673076	GREM2	(+102686)		FMN2	(+417591)		1
chr1:243417192-243417592	CEP170	(+1316)					1
chr1:243419542-243419942	CEP170	(-1034)					1
chr2:933266-933666	TMEM18	(-256027)					1
chr2:933906-934306	TMEM18	(-256667)					1
chr2:85389858-85390258	TCF7L1	(+29475)	hsa04520:Adherens junction				1
chr2:85476169-85476569	TCF7L1	(+115786)	hsa04520:Adherens junction				1
chr2:85491519-85491919	TCF7L1	(+131136)	hsa04520:Adherens junction				1
chr2:85525859-85526259	TCF7L1	(+165476)	hsa04520:Adherens junction				1
chr2:96810931-96811340	DUSP2	(+43)	hsa04010:MAPK signaling pathway				1
chr2:111436114-111436662	BUB1	(-704)	hsa04110:Cell cycle				1
chr3:48229650-48230068	CDC25A	(-58)	hsa04110:Cell cycle				1
chr3:52124221-52124621	POC1A	(+64285)					1
chr3:99563686-99564086	FILIP1L	(+269463)					1
chr3:127453655-127454097	MGLL	(+88175)					1
chr3:127458897-127459297	MGLL	(+82954)					1
chr3:127466927-127467327	MGLL	(+74924)					1
chr3:127487383-127487787	MGLL	(+54466)					1
chr3:127494387-127494787	MGLL	(+47464)					1
chr3:127541200-127541617	MGLL	(+642)					1
chr3:128207912-128208312	GATA2	(+3918)					1
chr3:150090433-150090833	TSC22D2	(-36155)					1
chr3:150183901-150184301	TSC22D2	(+57313)					1
chr3:160151881-160152461	TRIM59	(+15455)					1
chr3:160152831-160153231	TRIM59	(+14595)					1
chr3:160153411-160153811	TRIM59	(+14015)					1
chr3:160167651-160168162	TRIM59	(-281)					1
chr3:172349232-172349632	NCEH1	(+79576)					1
chr3:172468577-172468977	ECT2	(-3522)					1
chr3:189837819-189838219	LEPREL1	(+889)					1
chr4:1723076-1723476	TACC3	(+59)					1
chr4:1747816-1748216	TACC3	(+24799)					1
chr4:17848901-17849301	NCAPG	(+36576)					1
chr4:18022226-18022626	NCAPG	(+209901)					1
chr4:72052327-72052758	SLC4A4	(-460)					1
chr4:72053387-72053787	SLC4A4	(+584)					1
chr4:72209357-72209757	SLC4A4	(+156554)					1
chr4:72219197-72219597	SLC4A4	(+166394)					1
chr4:72443908-72444308	SLC4A4	(+391105)					1
chr4:81186742-81187232	FGF5	(-755)	hsa04010:MAPK signaling pathway				1
chr4:81187462-81187950	FGF5	(-36)	hsa04010:MAPK signaling pathway				1
chr4:81187985-81188385	FGF5	(+443)	hsa04010:MAPK signaling pathway				1
chr4:81189162-81190112	FGF5	(+1895)	hsa04010:MAPK signaling pathway				1
chr4:81215590-81215990	FGF5	(+28048)	hsa04010:MAPK signaling pathway				1
chr4:81216550-81216950	FGF5	(+29008)	hsa04010:MAPK signaling pathway				1
chr4:95427935-95428335	PDLIM5	(+55097)					1
chr4:95592139-95592539	PDLIM5	(+219301)					1
chr4:95594239-95594639	PDLIM5	(+221401)					1
chr4:95598175-95598575	PDLIM5	(+225337)					1
chr4:95598889-95599289	PDLIM5	(+226051)					1
chr4:104119230-104119705	CENPE	(+98)					1
chr4:119202010-119202410	PRSS12	(+71712)					1
chr4:119273964-119274364	PRSS12	(-242)					1
chr4:185654417-185654817	MLF1IP	(+669)					1
chr4:185654975-185655459	MLF1IP	(+69)					1
chr5:875815-876215	BRD9	(+16924)					1
chr5:892845-893285	BRD9	(-126)		TRIP13	(+96)		1
chr5:14185589-14186158	TRIO	(+42045)					1
chr5:14186881-14187281	TRIO	(+43252)					1
chr5:14265601-14266001	TRIO	(+121972)					1
chr5:14498381-14498781	TRIO	(+354752)					1
chr5:37810243-37810742	GDNF	(+25436)					1
chr5:37810913-37811313	GDNF	(+24816)					1
chr5:37811353-37811753	GDNF	(+24376)					1
chr5:37811993-37812393	GDNF	(+23736)					1
chr5:37825323-37825723	GDNF	(+10406)					1
chr5:37838163-37838563	GDNF	(-2434)					1
chr5:37839852-37840253	GDNF	(-4124)					1
chr5:54281189-54281637	ESM1	(+1)					1
chr5:172067823-172068235	NEURL1B	(-247)					1
chr5:176738607-176739027	MXD3	(+475)					1
chr5:176739207-176739607	MXD3	(-115)					1
chr6:18221166-18221566	DEK	(+43433)					1
chr6:26017743-26018174	HIST1H3A	(-2759)	hsa05322:Systemic lupus erythematosus	HIST1H1A	(+81)		1
chr6:26020873-26021374	HIST1H1A	(-3084)		HIST1H3A	(+406)	hsa05322:Systemic lupus erythematosus	1
chr6:26021694-26022133	HIST1H1A	(-3874)					1
chr6:26043706-26044282	HIST1H3C	(-1645)	hsa05322:Systemic lupus erythematosus				1
chr6:26045447-26045887	HIST1H3C	(+28)	hsa05322:Systemic lupus erythematosus				1
chr6:26123209-26123719	HIST1H2BC	(+668)	hsa05322:Systemic lupus erythematosus				1
chr6:26197242-26197664	HIST1H3D	(+2011)	hsa05322:Systemic lupus erythematosus				1
chr6:26199272-26200002	HIST1H3D	(-173)	hsa05322:Systemic lupus erythematosus	HIST1H2AD	(-166)	hsa05322:Systemic lupus erythematosus	1
chr6:26216636-26217376	HIST1H2AE	(-142)	hsa05322:Systemic lupus erythematosus	HIST1H2BG	(-134)	hsa05322:Systemic lupus erythematosus	1
chr6:26286499-26286899	HIST1H4H	(-972)	BP00273:Chromatin packaging and remodeling; hsa05322:Systemic lupus erythematosus				1
chr6:26313171-26313571	HIST1H4H	(-27644)	BP00273:Chromatin packaging and remodeling; hsa05322:Systemic lupus erythematosus				1
chr6:27774903-27775303	HIST1H3H	(-874)	hsa05322:Systemic lupus erythematosus				1
chr6:27860081-27860481	HIST1H3J	(-1711)	BP00273:Chromatin packaging and remodeling; hsa05322:Systemic lupus erythematosus	HIST1H2AM	(+682)	hsa05322:Systemic lupus erythematosus	1
chr6:27861033-27861461	HIST1H3J	(-2677)	BP00273:Chromatin packaging and remodeling; hsa05322:Systemic lupus erythematosus	HIST1H2AM	(-284)	hsa05322:Systemic lupus erythematosus	1
chr6:27862901-27863301	HIST1H3J	(-4531)	BP00273:Chromatin packaging and remodeling; hsa05322:Systemic lupus erythematosus	HIST1H2AM	(-2138)	hsa05322:Systemic lupus erythematosus	1
chr6:31126174-31126654	TCF19	(+111)					1
chr6:31387734-31388134	MICB	(-77921)					1
chr6:31461660-31462060	MICB	(-3995)					1
chr6:31463312-31463712	MICB	(-2343)					1
chr6:116573042-116573442	TSPYL4	(+2019)					1
chr6:159184098-159184498	EZR	(+55042)		SYTL3	(+113252)		1
chr6:159290806-159291206	EZR	(-51666)					1
chr7:55169742-55170142	EGFR	(+83217)	hsa04010:MAPK signaling pathway; hsa04520:Adherens junction				1
chr7:55232032-55232432	EGFR	(+145507)	hsa04010:MAPK signaling pathway; hsa04520:Adherens junction				1
chr7:55253732-55254132	EGFR	(+167207)	hsa04010:MAPK signaling pathway; hsa04520:Adherens junction				1
chr7:55275032-55275432	EGFR	(+188507)	hsa04010:MAPK signaling pathway; hsa04520:Adherens junction				1
chr7:55276042-55276442	EGFR	(+189517)	hsa04010:MAPK signaling pathway; hsa04520:Adherens junction				1
chr7:73448227-73448627	LIMK1	(-49680)					1
chr7:116311952-116312552	MET	(-207)	BP00063:Protein modification; BP00203:Cell cycle; BP00207:Cell cycle control; BP00285:Cell structure and motility; BP00287:Cell motility; hsa04510:Focal adhesion; hsa04520:Adherens junction; hsa05200:Pathways in cancer; hsa05211:Renal cell carcinoma				1
chr7:116356803-116357203	MET	(+44544)	BP00063:Protein modification; BP00203:Cell cycle; BP00207:Cell cycle control; BP00285:Cell structure and motility; BP00287:Cell motility; hsa04510:Focal adhesion; hsa04520:Adherens junction; hsa05200:Pathways in cancer; hsa05211:Renal cell carcinoma				1
chr7:116413232-116413632	MET	(+100973)	BP00063:Protein modification; BP00203:Cell cycle; BP00207:Cell cycle control; BP00285:Cell structure and motility; BP00287:Cell motility; hsa04510:Focal adhesion; hsa04520:Adherens junction; hsa05200:Pathways in cancer; hsa05211:Renal cell carcinoma				1
chr7:116438442-116438842	MET	(+126183)	BP00063:Protein modification; BP00203:Cell cycle; BP00207:Cell cycle control; BP00285:Cell structure and motility; BP00287:Cell motility; hsa04510:Focal adhesion; hsa04520:Adherens junction; hsa05200:Pathways in cancer; hsa05211:Renal cell carcinoma				1
chr7:131241046-131241846	PODXL	(-70)					1
chr7:158497191-158497619	NCAPG2	(+115)					1
chr8:27695119-27695614	PBK	(-18)					1
chr8:42063211-42063611	PLAT	(+1783)					1
chr8:42064851-42065306	PLAT	(+115)					1
chr8:48873748-48874148	MCM4	(+1185)	hsa03030:DNA replication; hsa04110:Cell cycle				1
chr8:67419635-67420035	MYBL1	(+105645)	BP00203:Cell cycle; BP00207:Cell cycle control				1
chr8:67467967-67468367	MYBL1	(+57313)	BP00203:Cell cycle; BP00207:Cell cycle control				1
chr8:67524749-67525149	MYBL1	(+531)	BP00203:Cell cycle; BP00207:Cell cycle control				1
chr8:67525219-67525649	MYBL1	(+46)	BP00203:Cell cycle; BP00207:Cell cycle control				1
chr9:33523934-33524334	ANXA2	(-100089)					1
chr9:71788519-71788919	TJP2	(-31359)					1
chr9:91073764-91074164	SPIN1	(+70667)					1
chr9:91075544-91075944	SPIN1	(+72447)					1
chr9:91091904-91092304	SPIN1	(+88807)					1
chr9:106856494-106857164	SMC2	(+288)					1
chr9:123639334-123639854	PHF19	(+12)					1
chr9:130565916-130566394	FPGS	(+1001)		ENG	(+50892)		1
chr10:13203118-13203788	MCM10	(-101)					1
chr10:58121067-58121467	ZWINT	(-233)					1
chr10:69675000-69675400	HERC4	(+159903)					1
chr10:69774409-69774809	HERC4	(+60494)					1
chr10:69807293-69807693	HERC4	(+27610)					1
chr10:94416022-94416422	KIF11	(+63397)					1
chr10:96305437-96305841	HELLS	(+65)					1
chr10:101634320-101634720	DNMBP	(+135156)					1
chr10:124914027-124914466	BUB3	(+487)	hsa04110:Cell cycle				1
chr10:124925706-124926106	BUB3	(+12146)	hsa04110:Cell cycle				1
chr11:844808-845208	TSPAN4	(+2184)					1
chr11:868358-868758	TSPAN4	(+25734)					1
chr11:4116214-4116614	RRM1	(+490)	hsa00240:Pyrimidine metabolism				1
chr11:9432755-9433535	IPO7	(+26976)					1
chr11:27671835-27672471	BDNF	(+50447)	hsa04010:MAPK signaling pathway				1
chr11:28129402-28129802	KIF18A	(+144)					1
chr11:33037654-33038054	DEPDC7	(+444)					1
chr11:35104009-35104409	CD44	(-56208)					1
chr11:35104939-35105339	CD44	(-55278)					1
chr11:35180074-35180474	CD44	(+19857)					1
chr11:35200690-35201090	CD44	(+40473)					1
chr11:46760241-46760641	CKAP5	(+107418)					1
chr11:47207036-47207496	PACSIN3	(+744)					1
chr11:48102805-48103251	PTPRJ	(+100918)	hsa04520:Adherens junction				1
chr11:58291823-58292223	LPXN	(+51367)					1
chr11:58343076-58343476	LPXN	(+114)					1
chr11:61891307-61892103	INCENP	(+260)					1
chr11:61917842-61918242	INCENP	(+26597)					1
chr11:65656424-65657052	FIBP	(-728)					1
chr11:66103227-66103627	RIN1	(+573)					1
chr11:102218117-102218517	BIRC2	(+351)					1
chr11:102218668-102219157	BIRC2	(+947)					1
chr11:102225157-102225557	BIRC2	(+7391)					1
chr11:102231817-102232217	BIRC2	(+14051)					1
chr11:102276887-102277287	BIRC2	(+59121)					1
chr11:122614978-122615378	UBASH3B	(+88780)					1
chr11:122634968-122635428	UBASH3B	(+108800)					1
chr11:122932152-122932552	HSPA8	(+549)	hsa04010:MAPK signaling pathway				1
chr11:122961362-122961762	HSPA8	(-28661)	hsa04010:MAPK signaling pathway	CLMP	(+104445)		1
chr11:123300168-123300568	CLMP	(-234361)		GRAMD1B	(-96160)		1
chr11:123300868-123301368	CLMP	(-235111)		GRAMD1B	(-95410)		1
chr11:123301611-123302038	CLMP	(-235818)		GRAMD1B	(-94703)		1
chr11:126292293-126292693	ST3GAL4	(+66953)		KIRREL3	(+578273)		1
chr11:126301533-126301933	ST3GAL4	(+76193)		KIRREL3	(+569033)		1
chr11:126333103-126333523	ST3GAL4	(+107773)		KIRREL3	(+537453)		1
chr11:126515090-126515490	ST3GAL4	(+289750)		KIRREL3	(+355476)		1
chr12:6603002-6603402	NCAPD2	(-96)					1
chr12:12879602-12880013	APOLD1	(+957)					1
chr12:12972488-12972888	GPRC5A	(-71268)		DDX47	(+6547)		1
chr12:13030495-13030895	GPRC5A	(-13261)		DDX47	(+64554)		1
chr12:13043970-13044716	GPRC5A	(+387)					1
chr12:48130960-48131360	RAPGEF3	(+21729)					1
chr12:50418960-50419387	RACGAP1	(+133)					1
chr12:51785252-51785652	GALNT6	(-252)	BP00009:Other polysaccharide metabolism; BP00063:Protein modification; BP00067:Protein glycosylation				1
chr12:53662160-53662560	ESPL1	(+277)	hsa04110:Cell cycle				1
chr12:57145836-57146244	PRIM1	(+106)	hsa00240:Pyrimidine metabolism; hsa03030:DNA replication				1
chr12:78391957-78392357	NAV3	(+167088)					1
chr12:78435267-78435667	NAV3	(+210398)					1
chr12:78524267-78524667	NAV3	(+299398)					1
chr12:78528267-78528667	NAV3	(+303398)					1
chr12:100967264-100967664	GAS2L3	(-25)					1
chr12:109029313-109029713	SELPLG	(-1843)					1
chr12:109033363-109034091	SELPLG	(-6057)					1
chr12:109035591-109035991	SELPLG	(-8121)					1
chr12:109047725-109048125	SELPLG	(-20255)					1
chr12:109048275-109048675	SELPLG	(-20805)					1
chr12:119617194-119617594	HSPB8	(+799)					1
chr12:119618214-119618614	HSPB8	(+1819)					1
chr12:120241162-120241562	CIT	(+73733)					1
chr12:120668472-120668872	PXN	(+34902)	BP00285:Cell structure and motility; BP00287:Cell motility; hsa04510:Focal adhesion; hsa04810:Regulation of actin cytoskeleton				1
chr12:120669093-120669553	PXN	(+34251)	BP00285:Cell structure and motility; BP00287:Cell motility; hsa04510:Focal adhesion; hsa04810:Regulation of actin cytoskeleton				1
chr13:21750117-21750555	MRP63	(-36)		SKA3	(+405)		1
chr13:38443592-38443992	TRPC4	(+147)					1
chr13:45768253-45768653	KCTD4	(+6722)		GTF2F2	(+73822)		1
chr13:45885324-45886094	KCTD4	(-110534)					1
chr13:114185831-114186231	TFDP1	(-53025)	BP00031:Nucleoside, nucleotide and nucleic acid metabolism; BP00203:Cell cycle; hsa04110:Cell cycle				1
chr13:114238606-114239061	TFDP1	(-222)	BP00031:Nucleoside, nucleotide and nucleic acid metabolism; BP00203:Cell cycle; hsa04110:Cell cycle				1
chr13:114265576-114265976	TFDP1	(+26720)	BP00031:Nucleoside, nucleotide and nucleic acid metabolism; BP00203:Cell cycle; hsa04110:Cell cycle				1
chr14:90422652-90423118	TDP1	(+639)					1
chr14:102701495-102701895	MOK	(+69836)					1
chr15:32933784-32934184	SCG5	(+114)					1
chr15:35087606-35088006	ACTC1	(+121)					1
chr15:35102862-35103262	ACTC1	(-15135)					1
chr15:40886104-40886736	CASC5	(-27)					1
chr15:74274613-74275013	STOML1	(+9822)					1
chr15:74275730-74276130	STOML1	(+8705)					1
chr15:74677534-74677934	SEMA7A	(+48565)					1
chr15:75965925-75966325	CSPG4	(+39064)					1
chr15:89248289-89248689	ACAN	(-98185)					1
chr16:46654970-46655397	SHCBP1	(+127)					1
chr16:55504419-55504819	MMP2	(-8462)					1
chr16:55529069-55529469	MMP2	(+16188)					1
chr16:57835218-57835689	KIFC3	(+985)	BP00285:Cell structure and motility; BP00286:Cell structure				1
chr16:81040703-81041114	CENPN	(+806)					1
chr16:84511793-84512193	KIAA1609	(+26295)					1
chr17:6355189-6355589	PITPNM3	(+104488)					1
chr17:6458610-6459010	PITPNM3	(+1067)					1
chr17:16321741-16322141	C17orf76-AS1	(-20360)					1
chr17:18266586-18266986	SHMT1	(+70)					1
chr17:21189512-21190213	MAP2K3	(+1895)	hsa04010:MAPK signaling pathway				1
chr17:21218813-21219213	MAP2K3	(+31045)	hsa04010:MAPK signaling pathway				1
chr17:21219232-21219632	MAP2K3	(+31464)	hsa04010:MAPK signaling pathway				1
chr17:30001201-30001601	C17orf79	(+184925)					1
chr17:30185665-30186065	C17orf79	(+461)					1
chr17:41277139-41277543	BRCA1	(+159)					1
chr17:42906965-42907388	GJC1	(+1002)					1
chr17:57231670-57232103	SKA2	(+913)					1
chr17:57232144-57232730	SKA2	(+363)					1
chr17:59940577-59941311	BRIP1	(-24)					1
chr17:76879886-76880312	TIMP2	(+41373)					1
chr18:658023-658432	TYMS	(+624)	hsa00240:Pyrimidine metabolism				1
chr18:686519-686919	TYMS	(+29115)	hsa00240:Pyrimidine metabolism				1
chr18:57094923-57095323	CCBE1	(+269521)					1
chr18:57293912-57294312	CCBE1	(+70532)					1
chr18:57364341-57364741	CCBE1	(+103)					1
chr18:57386603-57387003	CCBE1	(-22159)					1
chr18:57455218-57455618	CCBE1	(-90774)					1
chr18:61554787-61555187	SERPINB2	(+48)					1
chr19:2167195-2167595	DOT1L	(+3247)					1
chr19:2186133-2186533	DOT1L	(+22185)					1
chr19:2208353-2208753	DOT1L	(+44405)					1
chr19:4683536-4683936	DPP9	(+40119)					1
chr19:10304430-10304830	DNMT1	(+1125)					1
chr19:10772983-10773383	ILF3	(+8246)					1
chr19:11253867-11254291	SPC24	(+12405)					1
chr19:11266212-11266623	SPC24	(+66)					1
chr19:17186001-17186401	HAUS8	(+142)					1
chr19:17186891-17187291	HAUS8	(-748)					1
chr19:36545336-36545736	WDR62	(-247)					1
chr19:38422842-38423242	SIPA1L3	(+25174)		DPF1	(+291848)		1
chr19:38700392-38700832	DPF1	(+14278)		SIPA1L3	(+302744)		1
chr19:38701078-38701478	DPF1	(+13612)		SIPA1L3	(+303410)		1
chr19:39408459-39408859	SARS2	(+12877)					1
chr19:48673284-48673716	LIG1	(+60)	hsa03030:DNA replication				1
chr19:51298070-51298470	ACPT	(+4598)					1
chr19:51298850-51299250	ACPT	(+5378)					1
chr20:814206-814606	FAM110A	(+50)					1
chr20:5099888-5100288	PCNA	(+559)	hsa03030:DNA replication; hsa04110:Cell cycle				1
chr20:25388089-25388592	GINS1	(+18)					1
chr21:28211182-28211642	ADAMTS1	(+6316)					1
chr21:28212262-28212862	ADAMTS1	(+5166)					1
chr21:28213262-28213662	ADAMTS1	(+4266)					1
chr21:28213952-28214352	ADAMTS1	(+3576)					1
chr21:28214402-28214802	ADAMTS1	(+3126)					1
chr22:41681457-41681886	RANGAP1	(+544)					1
chr22:41684417-41684817	RANGAP1	(-2401)					1
chr22:46068659-46069059	WNT7B	(+304149)					1
chr22:46084309-46085109	WNT7B	(+288299)					1
chr22:46181357-46181757	WNT7B	(+191451)					1
chr22:46186157-46186557	WNT7B	(+186651)					1
chr22:46299399-46299799	WNT7B	(+73409)					1
chr22:46367263-46367663	WNT7B	(+5545)					1
chrX:21961810-21962210	SMS	(+3295)					1
chrX:67919917-67920317	STARD8	(+52606)					1
chrX:69509488-69509888	PDZD11	(+110)					1
chrX:100352751-100353151	CENPI	(-1847)					1
chrX:100603602-100604036	TIMM8A	(+138)					1
chrX:153218888-153219288	HCFC1	(+17731)					1
chrX:153238336-153238736	HCFC1	(-1717)					1
chr1:31908289-31908689	SERINC2	(+22526)					3
chr1:38158040-38158448	CDCA8	(+85)					3
chr1:38176724-38177124	CDCA8	(+18765)					3
chr1:43829390-43829790	ELOVL1	(+4109)		CDC20	(+4964)	BP00203:Cell cycle; BP00207:Cell cycle control; hsa04110:Cell cycle; hsa04114:Oocyte meiosis	3
chr1:45187169-45187613	KIF2C	(-18099)					3
chr1:68962489-68962919	DEPDC1	(+95)					3
chr1:211848728-211849185	NEK2	(+15)					3
chr1:214776208-214776862	CENPF	(+3)					3
chr1:214777848-214778248	CENPF	(+1516)					3
chr1:215130870-215131350	CENPF	(+354578)					3
chr1:215246402-215246802	CENPF	(+470070)					3
chr2:36649445-36649845	FEZ2	(+175687)					3
chr2:36743345-36743745	FEZ2	(+81787)					3
chr2:36780675-36781075	FEZ2	(+44457)					3
chr4:122733919-122734319	CCNA2	(+10969)	BP00203:Cell cycle; BP00207:Cell cycle control; hsa04110:Cell cycle; hsa04914:Progesterone-mediated oocyte maturation	EXOSC9	(+11647)		3
chr4:122735449-122735849	CCNA2	(+9439)	BP00203:Cell cycle; BP00207:Cell cycle control; hsa04110:Cell cycle; hsa04914:Progesterone-mediated oocyte maturation	EXOSC9	(+13177)		3
chr5:68462854-68463254	CCNB1	(+217)	BP00203:Cell cycle; BP00207:Cell cycle control; hsa04110:Cell cycle; hsa04114:Oocyte meiosis; hsa04914:Progesterone-mediated oocyte maturation				3
chr5:126112134-126112534	LMNB1	(+19)					3
chr5:126112552-126113134	LMNB1	(+528)					3
chr5:126113359-126114449	LMNB1	(+1589)					3
chr5:126139897-126140297	LMNB1	(+27782)					3
chr6:12290383-12290845	EDN1	(+85)					3
chr6:12296288-12296688	EDN1	(+5959)					3
chr6:27861591-27861991	HIST1H2BO	(+588)					3
chr6:27862191-27862591	HIST1H2BO	(+1188)					3
chr7:36429331-36430191	ANLN	(+329)					3
chr7:73442389-73442796	ELN	(+166)					3
chr8:25101951-25102351	DOCK5	(+59864)					3
chr8:25316581-25317021	CDCA2	(+288)					3
chr8:25374246-25374646	CDCA2	(+57933)					3
chr10:58120753-58121153	ZWINT	(+81)					3
chr11:27670585-27670985	BDNF	(+51815)	hsa04010:MAPK signaling pathway				3
chr11:27720289-27721756	BDNF	(+1577)	hsa04010:MAPK signaling pathway				3
chr11:27722024-27722424	BDNF	(+376)	hsa04010:MAPK signaling pathway				3
chr11:27722866-27723266	BDNF	(-466)	hsa04010:MAPK signaling pathway				3
chr12:4647870-4648322	RAD51AP1	(+146)					3
chr12:49715840-49716240	TROAP	(-931)					3
chr12:49716899-49717357	TROAP	(+157)					3
chr14:24798126-24798526	ADCY4	(+5951)	hsa04114:Oocyte meiosis; hsa04914:Progesterone-mediated oocyte maturation				3
chr14:24798956-24799468	ADCY4	(+5065)	hsa04114:Oocyte meiosis; hsa04914:Progesterone-mediated oocyte maturation				3
chr14:24802818-24803426	ADCY4	(+1155)	hsa04114:Oocyte meiosis; hsa04914:Progesterone-mediated oocyte maturation				3
chr14:24803988-24804437	ADCY4	(+64)	hsa04114:Oocyte meiosis; hsa04914:Progesterone-mediated oocyte maturation				3
chr14:102746430-102747200	HSP90AA1	(-140729)	hsa04914:Progesterone-mediated oocyte maturation				3
chr15:64673411-64673815	KIAA0101	(+89)					3
chr16:850237-850637	GNG13	(+296)					3
chr16:46723409-46723901	ORC6	(+97)					3
chr17:38573849-38574679	TOP2A	(-62)	BP00203:Cell cycle				3
chr17:43000887-43001287	KIF18B	(+23995)					3
chr17:43001307-43001707	KIF18B	(+23575)					3
chr17:76167578-76167978	TK1	(+15507)					3
chr17:76171706-76172106	TK1	(+11379)					3
chr17:76182822-76183222	TK1	(+263)					3
chr20:44446250-44446687	UBE2C	(+5214)	BP00203:Cell cycle; BP00207:Cell cycle control				3
chr20:54942785-54943185	AURKA	(+24366)	BP00203:Cell cycle; hsa04114:Oocyte meiosis				3
chr20:54943460-54943860	AURKA	(+23691)	BP00203:Cell cycle; hsa04114:Oocyte meiosis				3
chr22:19467268-19467741	CDC45	(+91)	BP00203:Cell cycle; hsa04110:Cell cycle				3
chr22:19510735-19511135	CDC45	(+43521)	BP00203:Cell cycle; hsa04110:Cell cycle				3
chr1:1283362-1283782	DVL1	(+920)	hsa05200:Pathways in cancer				4
chr1:2383287-2383687	PLCH2	(-24267)					4
chr1:3230212-3230612	PRDM16	(+244670)					4
chr1:6551487-6551887	PLEKHG5	(+5797)	BP00016:Amino acid transport; BP00102:Signal transduction; BP00124:Cell adhesion; BP00129:Endocytosis; BP00203:Cell cycle; BP00285:Cell structure and motility				4
chr1:16076051-16076451	FBLIM1	(-9004)	BP00285:Cell structure and motility; BP00286:Cell structure; BP00287:Cell motility				4
chr1:16113490-16113890	FBLIM1	(+28435)	BP00285:Cell structure and motility; BP00286:Cell structure; BP00287:Cell motility				4
chr1:17880737-17881137	ARHGEF10L	(+14607)					4
chr1:17914788-17915188	ARHGEF10L	(+48658)					4
chr1:22352107-22352507	CDC42	(-26813)	BP00285:Cell structure and motility; hsa04510:Focal adhesion; hsa04810:Regulation of actin cytoskeleton; hsa05130:Pathogenic Escherichia coli infection; hsa05200:Pathways in cancer; hsa05211:Renal cell carcinoma				4
chr1:24126016-24126422	GALE	(-159)					4
chr1:32254507-32254907	SPOCD1	(+26873)					4
chr1:32264017-32264437	SPOCD1	(+17353)					4
chr1:36580695-36581195	TRAPPC3	(+34122)					4
chr1:43826522-43826922	CDC20	(+2096)	BP00203:Cell cycle; BP00207:Cell cycle control; hsa04110:Cell cycle; hsa04114:Oocyte meiosis	ELOVL1	(+6977)		4
chr1:43832773-43833463	ELOVL1	(+581)					4
chr1:62902546-62903000	USP1	(+798)					4
chr1:66943149-66943897	SGIP1	(-56302)					4
chr1:66998837-66999309	SGIP1	(-752)					4
chr1:85795302-85796086	DDAH1	(+135195)					4
chr1:113243339-113243739	RHOC	(+6139)	BP00285:Cell structure and motility				4
chr1:113247439-113248169	RHOC	(+1874)	BP00285:Cell structure and motility				4
chr1:150487662-150488119	ECM1	(+7404)					4
chr1:152273345-152273745	FLG	(+24134)	BP00285:Cell structure and motility; BP00286:Cell structure				4
chr1:153538199-153538662	S100A2	(-125)					4
chr1:153581228-153581926	S100A2	(-43271)					4
chr1:154154714-154155174	TPM3	(+9665)	BP00285:Cell structure and motility; BP00286:Cell structure; BP00287:Cell motility; hsa05200:Pathways in cancer; hsa05410:Hypertrophic cardiomyopathy (HCM); hsa05414:Dilated cardiomyopathy				4
chr1:155214548-155215007	GBA	(-125)	hsa04142:Lysosome				4
chr1:156076391-156076791	LMNA	(-7870)	BP00285:Cell structure and motility; BP00286:Cell structure; hsa05410:Hypertrophic cardiomyopathy (HCM); hsa05412:Arrhythmogenic right ventricular cardiomyopathy (ARVC); hsa05414:Dilated cardiomyopathy				4
chr1:156094773-156095173	SEMA4A	(-28349)	BP00102:Signal transduction; BP00108:Receptor protein tyrosine kinase signaling pathway; BP00193:Developmental processes; hsa04360:Axon guidance	LMNA	(+10512)	BP00285:Cell structure and motility; BP00286:Cell structure; hsa05410:Hypertrophic cardiomyopathy (HCM); hsa05412:Arrhythmogenic right ventricular cardiomyopathy (ARVC); hsa05414:Dilated cardiomyopathy	4
chr1:156095941-156096461	SEMA4A	(-27121)	BP00102:Signal transduction; BP00108:Receptor protein tyrosine kinase signaling pathway; BP00193:Developmental processes; hsa04360:Axon guidance	LMNA	(+11740)	BP00285:Cell structure and motility; BP00286:Cell structure; hsa05410:Hypertrophic cardiomyopathy (HCM); hsa05412:Arrhythmogenic right ventricular cardiomyopathy (ARVC); hsa05414:Dilated cardiomyopathy	4
chr1:156099871-156100373	SEMA4A	(-23200)	BP00102:Signal transduction; BP00108:Receptor protein tyrosine kinase signaling pathway; BP00193:Developmental processes; hsa04360:Axon guidance	LMNA	(+15661)	BP00285:Cell structure and motility; BP00286:Cell structure; hsa05410:Hypertrophic cardiomyopathy (HCM); hsa05412:Arrhythmogenic right ventricular cardiomyopathy (ARVC); hsa05414:Dilated cardiomyopathy	4
chr1:156113471-156113871	SEMA4A	(-9651)	BP00102:Signal transduction; BP00108:Receptor protein tyrosine kinase signaling pathway; BP00193:Developmental processes; hsa04360:Axon guidance	LMNA	(+29210)	BP00285:Cell structure and motility; BP00286:Cell structure; hsa05410:Hypertrophic cardiomyopathy (HCM); hsa05412:Arrhythmogenic right ventricular cardiomyopathy (ARVC); hsa05414:Dilated cardiomyopathy	4
chr1:156114591-156114991	SEMA4A	(-8531)	BP00102:Signal transduction; BP00108:Receptor protein tyrosine kinase signaling pathway; BP00193:Developmental processes; hsa04360:Axon guidance	LMNA	(+30330)	BP00285:Cell structure and motility; BP00286:Cell structure; hsa05410:Hypertrophic cardiomyopathy (HCM); hsa05412:Arrhythmogenic right ventricular cardiomyopathy (ARVC); hsa05414:Dilated cardiomyopathy	4
chr1:160175859-160176424	PEA15	(+1017)					4
chr1:160188634-160189034	PEA15	(+13709)					4
chr1:162954561-162955331	RGS4	(-83450)					4
chr1:179055920-179056320	ABL2	(+56104)	BP00063:Protein modification; BP00203:Cell cycle; BP00207:Cell cycle control; BP00285:Cell structure and motility; BP00287:Cell motility				4
chr1:179056859-179057259	ABL2	(+55165)	BP00063:Protein modification; BP00203:Cell cycle; BP00207:Cell cycle control; BP00285:Cell structure and motility; BP00287:Cell motility				4
chr1:185261876-185262276	IVNS1ABP	(+24385)					4
chr1:193239411-193239811	B3GALT2	(-83868)	BP00063:Protein modification; BP00067:Protein glycosylation				4
chr1:198651528-198651928	PTPRC	(+43591)	BP00063:Protein modification				4
chr1:203481822-203482222	ATP2B4	(-113893)	BP00291:Calcium ion homeostasis; hsa04020:Calcium signaling pathway				4
chr1:203525430-203525830	ATP2B4	(-70285)	BP00291:Calcium ion homeostasis; hsa04020:Calcium signaling pathway				4
chr1:215016410-215016810	KCNK2	(-239950)					4
chr1:215130774-215131211	KCNK2	(-125567)					4
chr1:215162633-215163033	KCNK2	(-93727)					4
chr1:215178670-215179270	KCNK2	(-77590)					4
chr1:215221890-215222290	KCNK2	(-34470)					4
chr1:223888781-223889181	CAPN2	(-11138)	BP00102:Signal transduction; hsa04510:Focal adhesion				4
chr1:223914735-223915135	CAPN2	(+14816)	BP00102:Signal transduction; hsa04510:Focal adhesion				4
chr1:223944501-223944977	CAPN2	(+44620)	BP00102:Signal transduction; hsa04510:Focal adhesion				4
chr1:223959247-223959647	CAPN2	(+59328)	BP00102:Signal transduction; hsa04510:Focal adhesion				4
chr1:223959937-223960337	CAPN2	(+60018)	BP00102:Signal transduction; hsa04510:Focal adhesion				4
chr1:223966047-223966447	CAPN2	(+66128)	BP00102:Signal transduction; hsa04510:Focal adhesion				4
chr1:243416762-243417162	CEP170	(+1746)					4
chr1:243418822-243419241	CEP170	(-324)					4
chr1:246730608-246731018	CNST	(+1174)					4
chr2:9331716-9332116	MBOAT2	(-188040)					4
chr2:9719005-9719405	YWHAQ	(+51901)	BP00203:Cell cycle; hsa04110:Cell cycle; hsa05130:Pathogenic Escherichia coli infection				4
chr2:9744465-9744865	YWHAQ	(+26441)	BP00203:Cell cycle; hsa04110:Cell cycle; hsa05130:Pathogenic Escherichia coli infection				4
chr2:9753773-9754173	YWHAQ	(+17133)	BP00203:Cell cycle; hsa04110:Cell cycle; hsa05130:Pathogenic Escherichia coli infection				4
chr2:9892786-9893222	YWHAQ	(-121898)	BP00203:Cell cycle; hsa04110:Cell cycle; hsa05130:Pathogenic Escherichia coli infection				4
chr2:9893256-9893775	YWHAQ	(-122410)	BP00203:Cell cycle; hsa04110:Cell cycle; hsa05130:Pathogenic Escherichia coli infection				4
chr2:10260252-10261107	RRM2	(-2015)					4
chr2:10422666-10423066	RRM2	(+160171)					4
chr2:20473809-20474209	SDC1	(-49082)	BP00285:Cell structure and motility				4
chr2:27265205-27265605	TMEM214	(+9631)					4
chr2:27632956-27633356	PPM1G	(-660)	BP00063:Protein modification				4
chr2:36660430-36660830	CRIM1	(+77260)		FEZ2	(+164702)		4
chr2:40261285-40261685	SLC8A1	(+395959)	hsa05410:Hypertrophic cardiomyopathy (HCM); hsa05414:Dilated cardiomyopathy				4
chr2:40328113-40328513	SLC8A1	(+329131)	hsa05410:Hypertrophic cardiomyopathy (HCM); hsa05414:Dilated cardiomyopathy				4
chr2:40627771-40628171	SLC8A1	(+29473)	hsa05410:Hypertrophic cardiomyopathy (HCM); hsa05414:Dilated cardiomyopathy				4
chr2:47109720-47110120	MCFD2	(+33331)	BP00136:Other intracellular protein traffic				4
chr2:47129678-47130078	MCFD2	(+13373)	BP00136:Other intracellular protein traffic				4
chr2:54557191-54557770	SPTBN1	(-125973)	BP00285:Cell structure and motility; BP00286:Cell structure				4
chr2:54563693-54564093	SPTBN1	(-119561)	BP00285:Cell structure and motility; BP00286:Cell structure				4
chr2:73332821-73333221	RAB11FIP5	(-25874)		RAB11FIP5	(+7125)		4
chr2:73404301-73404775	RAB11FIP5	(-64392)					4
chr2:74607144-74607584	DCTN1	(+118)					4
chr2:75784592-75784992	FAM176A	(+3300)					4
chr2:75786201-75786665	FAM176A	(+1659)					4
chr2:75787927-75788327	FAM176A	(-35)					4
chr2:85619597-85619997	CAPG	(+17879)	BP00285:Cell structure and motility; BP00286:Cell structure				4
chr2:85640851-85641251	CAPG	(-3375)	BP00285:Cell structure and motility; BP00286:Cell structure				4
chr2:98279388-98280011	ACTR1B	(+861)	BP00203:Cell cycle; BP00282:Mitosis; BP00285:Cell structure and motility; BP00286:Cell structure				4
chr2:102090841-102091241	RFX8	(+124)					4
chr2:102091290-102091784	RFX8	(-372)					4
chr2:113522209-113522609	CKAP2L	(-155)					4
chr2:119981270-119981710	STEAP3	(+106)					4
chr2:119989452-119989852	STEAP3	(+8268)					4
chr2:158114053-158114476	GALNT5	(-75)	BP00009:Other polysaccharide metabolism; BP00063:Protein modification; BP00067:Protein glycosylation				4
chr2:192036889-192037289	MYO1B	(-73018)					4
chr2:192110729-192111129	MYO1B	(+822)					4
chr2:192111427-192111893	MYO1B	(+1553)					4
chr2:192295967-192296422	MYO1B	(+186088)					4
chr2:192298142-192298542	MYO1B	(+188235)					4
chr2:202662797-202663197	CDK15	(-8155)	BP00063:Protein modification; BP00203:Cell cycle; BP00207:Cell cycle control; BP00282:Mitosis				4
chr2:202672168-202672568	CDK15	(+1216)	BP00063:Protein modification; BP00203:Cell cycle; BP00207:Cell cycle control; BP00282:Mitosis				4
chr3:8801204-8801604	CAV3	(+25918)	hsa04510:Focal adhesion				4
chr3:49027856-49028411	P4HTM	(+793)	BP00063:Protein modification				4
chr3:50378349-50378749	RASSF1	(-182)	hsa05200:Pathways in cancer; hsa05219:Bladder cancer				4
chr3:111805119-111805519	C3orf52	(+137)					4
chr3:123452742-123453142	MYLK	(+150207)	BP00063:Protein modification; BP00064:Protein phosphorylation; BP00102:Signal transduction; BP00120:Cell adhesion-mediated signaling; BP00173:Muscle contraction; BP00274:Cell communication; BP00275:Extracellular matrix protein-mediated signaling; BP00285:Cell structure and motility; hsa04020:Calcium signaling pathway; hsa04270:Vascular smooth muscle contraction; hsa04510:Focal adhesion; hsa04810:…				4
chr3:123453361-123453761	MYLK	(+149588)	BP00063:Protein modification; BP00064:Protein phosphorylation; BP00102:Signal transduction; BP00120:Cell adhesion-mediated signaling; BP00173:Muscle contraction; BP00274:Cell communication; BP00275:Extracellular matrix protein-mediated signaling; BP00285:Cell structure and motility; hsa04020:Calcium signaling pathway; hsa04270:Vascular smooth muscle contraction; hsa04510:Focal adhesion; hsa04810:…				4
chr3:123535577-123535977	MYLK	(+67372)	BP00063:Protein modification; BP00064:Protein phosphorylation; BP00102:Signal transduction; BP00120:Cell adhesion-mediated signaling; BP00173:Muscle contraction; BP00274:Cell communication; BP00275:Extracellular matrix protein-mediated signaling; BP00285:Cell structure and motility; hsa04020:Calcium signaling pathway; hsa04270:Vascular smooth muscle contraction; hsa04510:Focal adhesion; hsa04810:…				4
chr3:137834010-137834727	DZIP1L	(+82)					4
chr3:149085299-149085795	TM4SF1	(+10021)					4
chr3:149086009-149086435	TM4SF1	(+9346)					4
chr3:149091295-149091695	TM4SF1	(+4073)					4
chr3:149184616-149185016	TM4SF1	(-89248)		TM4SF4	(-7552)		4
chr3:149865356-149865756	TSC22D2	(-261232)					4
chr3:150088703-150089103	TSC22D2	(-37885)					4
chr3:150179772-150180291	TSC22D2	(+53244)					4
chr3:156253019-156253979	SSR3	(+19474)	BP00136:Other intracellular protein traffic				4
chr3:156254324-156254880	SSR3	(+18371)	BP00136:Other intracellular protein traffic				4
chr3:156256370-156256770	SSR3	(+16403)	BP00136:Other intracellular protein traffic				4
chr3:156271809-156272209	SSR3	(+964)	BP00136:Other intracellular protein traffic				4
chr3:156272320-156272730	SSR3	(+448)	BP00136:Other intracellular protein traffic				4
chr3:160117853-160118361	SMC4	(+677)	BP00203:Cell cycle; BP00206:Chromosome segregation; BP00273:Chromatin packaging and remodeling; BP00282:Mitosis				4
chr3:160118426-160118826	SMC4	(+1196)	BP00203:Cell cycle; BP00206:Chromosome segregation; BP00273:Chromatin packaging and remodeling; BP00282:Mitosis				4
chr3:160153432-160153906	SMC4	(+36239)	BP00203:Cell cycle; BP00206:Chromosome segregation; BP00273:Chromatin packaging and remodeling; BP00282:Mitosis				4
chr3:194353560-194353960	TMEM44	(+390)					4
chr3:194354141-194354610	TMEM44	(-226)					4
chr3:195622790-195623190	TNK2	(-558)	BP00063:Protein modification				4
chr4:1874566-1874972	WHSC1	(+1646)	BP00273:Chromatin packaging and remodeling	WHSC2	(+136193)		4
chr4:1985981-1986622	WHSC2	(+24660)		WHSC1	(+113179)	BP00273:Chromatin packaging and remodeling	4
chr4:10109315-10109715	WDR1	(+9058)	BP00285:Cell structure and motility; BP00287:Cell motility				4
chr4:15589425-15589825	FBXL5	(+67410)					4
chr4:15655110-15655510	FBXL5	(+1725)					4
chr4:15655590-15655990	FBXL5	(+1245)					4
chr4:15692071-15692601	BST1	(-12237)					4
chr4:15692864-15693534	BST1	(-11374)					4
chr4:15697121-15697521	BST1	(-7252)					4
chr4:15704535-15704935	BST1	(+162)					4
chr4:26328384-26328784	RBPJ	(+6155)					4
chr4:39466668-39467068	UGDH	(+62350)	BP00009:Other polysaccharide metabolism				4
chr4:39498442-39499059	UGDH	(+30467)	BP00009:Other polysaccharide metabolism				4
chr4:39512192-39512592	UGDH	(+16826)	BP00009:Other polysaccharide metabolism				4
chr4:39528289-39528689	UGDH	(+729)	BP00009:Other polysaccharide metabolism				4
chr4:54172680-54173080	SCFD2	(+59362)					4
chr4:54331793-54332193	SCFD2	(-99751)					4
chr4:81104571-81104971	PRDM8	(-13886)					4
chr4:81159294-81159739	PRDM8	(+40860)					4
chr4:114883936-114884336	ARSJ	(+16742)					4
chr4:119200200-119200600	PRSS12	(+73522)					4
chr4:119201796-119202396	PRSS12	(+71826)					4
chr4:119203096-119203496	PRSS12	(+70626)					4
chr4:119273930-119274330	PRSS12	(-208)					4
chr4:157695590-157695990	PDGFC	(+196756)	hsa04510:Focal adhesion; hsa04810:Regulation of actin cytoskeleton				4
chr4:157893017-157893446	PDGFC	(-686)	hsa04510:Focal adhesion; hsa04810:Regulation of actin cytoskeleton				4
chr4:170079499-170079899	SH3RF1	(+112550)					4
chr4:174254571-174254971	HMGB2	(+149)					4
chr4:177327709-177328109	VEGFC	(+385986)	BP00203:Cell cycle; BP00207:Cell cycle control; hsa04510:Focal adhesion; hsa05200:Pathways in cancer; hsa05211:Renal cell carcinoma; hsa05219:Bladder cancer				4
chr4:177711192-177711868	VEGFC	(+2365)	BP00203:Cell cycle; BP00207:Cell cycle control; hsa04510:Focal adhesion; hsa05200:Pathways in cancer; hsa05211:Renal cell carcinoma; hsa05219:Bladder cancer				4
chr4:177712668-177713562	VEGFC	(+780)	BP00203:Cell cycle; BP00207:Cell cycle control; hsa04510:Focal adhesion; hsa05200:Pathways in cancer; hsa05211:Renal cell carcinoma; hsa05219:Bladder cancer				4
chr4:177713952-177714352	VEGFC	(-257)	BP00203:Cell cycle; BP00207:Cell cycle control; hsa04510:Focal adhesion; hsa05200:Pathways in cancer; hsa05211:Renal cell carcinoma; hsa05219:Bladder cancer				4
chr4:177823919-177824319	VEGFC	(-110224)	BP00203:Cell cycle; BP00207:Cell cycle control; hsa04510:Focal adhesion; hsa05200:Pathways in cancer; hsa05211:Renal cell carcinoma; hsa05219:Bladder cancer				4
chr4:186280885-186281285	LRP2BP	(+19067)					4
chr5:6713088-6713528	PAPD7	(-1410)	BP00203:Cell cycle				4
chr5:6759708-6760108	PAPD7	(+45190)	BP00203:Cell cycle				4
chr5:33891910-33892465	ADAMTS12	(-64)					4
chr5:52100972-52101372	ITGA2	(-183984)	hsa04510:Focal adhesion; hsa04810:Regulation of actin cytoskeleton; hsa05200:Pathways in cancer; hsa05410:Hypertrophic cardiomyopathy (HCM); hsa05414:Dilated cardiomyopathy				4
chr5:52778421-52779027	FST	(+2460)					4
chr5:65349485-65349885	SREK1	(-90400)					4
chr5:68485040-68485440	CENPH	(-135)					4
chr5:82939649-82940049	HAPLN1	(+77047)					4
chr5:82949409-82949809	HAPLN1	(+67287)					4
chr5:83221543-83221943	HAPLN1	(-204847)					4
chr5:83251703-83252103	HAPLN1	(-235007)					4
chr5:83430882-83431282	HAPLN1	(-414186)					4
chr5:83530989-83531389	HAPLN1	(-514293)					4
chr5:98109930-98110362	RGMB	(+5147)					4
chr5:98131993-98132496	RGMB	(+27246)					4
chr5:121400687-121401146	SRFBP1	(+103261)					4
chr5:121409646-121410046	SRFBP1	(+112190)					4
chr5:137513525-137514059	BRD8	(+566)					4
chr5:138861632-138862321	TMEM173	(+366)					4
chr5:141703695-141704095	SPRY4	(+725)					4
chr5:141706976-141707376	SPRY4	(-2556)					4
chr5:142024674-142025074	SPRY4	(-320254)		FGF1	(+40779)	BP00102:Signal transduction; BP00111:Intracellular signaling cascade; BP00193:Developmental processes; BP00203:Cell cycle; BP00207:Cell cycle control; BP00224:Cell proliferation and differentiation; BP00274:Cell communication; hsa04810:Regulation of actin cytoskeleton; hsa05200:Pathways in cancer	4
chr5:142749597-142749997	NR3C1	(+34248)					4
chr5:143536997-143537397	NR3C1	(-753152)					4
chr5:176754556-176755001	MXD3	(-15487)					4
chr6:26021674-26022074	HIST1H4A	(-33)	BP00273:Chromatin packaging and remodeling; hsa05322:Systemic lupus erythematosus				4
chr6:26022184-26022584	HIST1H4A	(+477)	BP00273:Chromatin packaging and remodeling; hsa05322:Systemic lupus erythematosus				4
chr6:26031504-26031904	HIST1H3B	(+584)	BP00273:Chromatin packaging and remodeling; hsa05322:Systemic lupus erythematosus				4
chr6:26033134-26033534	HIST1H3B	(-1046)	BP00273:Chromatin packaging and remodeling; hsa05322:Systemic lupus erythematosus	HIST1H2AB	(+462)	BP00273:Chromatin packaging and remodeling; hsa05322:Systemic lupus erythematosus	4
chr6:26043717-26044416	HIST1H2BB	(-182)	hsa05322:Systemic lupus erythematosus				4
chr6:26045972-26046372	HIST1H2BB	(-2287)	hsa05322:Systemic lupus erythematosus				4
chr6:26271343-26271753	HIST1H2BI	(-1656)	hsa05322:Systemic lupus erythematosus	HIST1H3G	(+64)	BP00273:Chromatin packaging and remodeling; hsa05322:Systemic lupus erythematosus	4
chr6:26272972-26273383	HIST1H3G	(-1566)	BP00273:Chromatin packaging and remodeling; hsa05322:Systemic lupus erythematosus	HIST1H2BI	(-26)	hsa05322:Systemic lupus erythematosus	4
chr6:26286458-26286904	HIST1H4H	(-954)	BP00273:Chromatin packaging and remodeling; hsa05322:Systemic lupus erythematosus				4
chr6:26322914-26323314	HIST1H4H	(-37387)	BP00273:Chromatin packaging and remodeling; hsa05322:Systemic lupus erythematosus				4
chr6:27100664-27101064	HIST1H2BJ	(-289)	hsa05322:Systemic lupus erythematosus	HIST1H2AG	(+47)	BP00273:Chromatin packaging and remodeling; hsa05322:Systemic lupus erythematosus	4
chr6:27781599-27781999	HIST1H2BM	(-1023)	hsa05322:Systemic lupus erythematosus				4
chr6:27782685-27783085	HIST1H2BM	(+63)	hsa05322:Systemic lupus erythematosus				4
chr6:27833263-27833663	HIST1H2AL	(+356)	BP00273:Chromatin packaging and remodeling; hsa05322:Systemic lupus erythematosus				4
chr6:27833881-27834573	HIST1H2AL	(+1120)	BP00273:Chromatin packaging and remodeling; hsa05322:Systemic lupus erythematosus	HIST1H1B	(+1132)	BP00273:Chromatin packaging and remodeling	4
chr6:27835073-27835516	HIST1H1B	(+64)	BP00273:Chromatin packaging and remodeling				4
chr6:27857591-27857991	HIST1H3J	(+779)	BP00273:Chromatin packaging and remodeling; hsa05322:Systemic lupus erythematosus				4
chr6:27858347-27858751	HIST1H3J	(+21)	BP00273:Chromatin packaging and remodeling; hsa05322:Systemic lupus erythematosus				4
chr6:30658221-30658749	NRM	(+573)					4
chr6:33384446-33384846	CUTA	(+1419)					4
chr6:34191478-34191878	HMGA1	(-12972)	BP00203:Cell cycle; BP00206:Chromosome segregation; BP00282:Mitosis				4
chr6:34212062-34212462	C6orf1	(+4642)		HMGA1	(+7612)	BP00203:Cell cycle; BP00206:Chromosome segregation; BP00282:Mitosis	4
chr6:34214465-34214865	C6orf1	(+2239)		HMGA1	(+10015)	BP00203:Cell cycle; BP00206:Chromosome segregation; BP00282:Mitosis	4
chr6:56313673-56314073	DST	(+193821)	BP00124:Cell adhesion; BP00203:Cell cycle; BP00207:Cell cycle control; BP00285:Cell structure and motility				4
chr6:56381173-56381573	DST	(+126321)	BP00124:Cell adhesion; BP00203:Cell cycle; BP00207:Cell cycle control; BP00285:Cell structure and motility				4
chr6:56419663-56420063	DST	(+87831)	BP00124:Cell adhesion; BP00203:Cell cycle; BP00207:Cell cycle control; BP00285:Cell structure and motility				4
chr6:56420313-56420713	DST	(+87181)	BP00124:Cell adhesion; BP00203:Cell cycle; BP00207:Cell cycle control; BP00285:Cell structure and motility				4
chr6:56476463-56476920	DST	(+31002)	BP00124:Cell adhesion; BP00203:Cell cycle; BP00207:Cell cycle control; BP00285:Cell structure and motility				4
chr6:56592403-56592803	DST	(-84909)	BP00124:Cell adhesion; BP00203:Cell cycle; BP00207:Cell cycle control; BP00285:Cell structure and motility				4
chr6:56707789-56708209	DST	(-200305)	BP00124:Cell adhesion; BP00203:Cell cycle; BP00207:Cell cycle control; BP00285:Cell structure and motility				4
chr6:86159565-86160028	NT5E	(+495)					4
chr6:86174358-86174758	NT5E	(+15256)					4
chr6:86206749-86207149	NT5E	(+47647)					4
chr6:130686669-130687297	TMEM200A	(-71279)					4
chr6:152606184-152606584	SYNE1	(+352150)					4
chr6:153304384-153304784	FBXO5	(-381)					4
chr6:153305113-153305538	FBXO5	(-1123)					4
chr6:160211015-160211415	MRPL18	(-277)					4
chr7:1938891-1939291	MAD1L1	(+333492)	BP00203:Cell cycle; BP00282:Mitosis; hsa04110:Cell cycle				4
chr7:1952264-1952664	MAD1L1	(+320119)	BP00203:Cell cycle; BP00282:Mitosis; hsa04110:Cell cycle				4
chr7:1980014-1980491	MAD1L1	(+292330)	BP00203:Cell cycle; BP00282:Mitosis; hsa04110:Cell cycle				4
chr7:2011500-2011900	MAD1L1	(+260883)	BP00203:Cell cycle; BP00282:Mitosis; hsa04110:Cell cycle				4
chr7:23286193-23286656	GPNMB	(+109)					4
chr7:23287147-23287547	GPNMB	(+1031)					4
chr7:44887059-44887459	H2AFV	(+466)	BP00273:Chromatin packaging and remodeling; hsa05322:Systemic lupus erythematosus				4
chr7:44887889-44888319	H2AFV	(-379)	BP00273:Chromatin packaging and remodeling; hsa05322:Systemic lupus erythematosus				4
chr7:44915998-44916398	H2AFV	(-28473)	BP00273:Chromatin packaging and remodeling; hsa05322:Systemic lupus erythematosus				4
chr7:66281018-66281418	RABGEF1	(+76235)	BP00129:Endocytosis; BP00136:Other intracellular protein traffic				4
chr7:73245201-73245601	CLDN4	(+208)	BP00285:Cell structure and motility; BP00286:Cell structure				4
chr7:73256121-73256521	CLDN4	(+11128)	BP00285:Cell structure and motility; BP00286:Cell structure				4
chr7:97929791-97930331	BRI3	(+19082)		BAIAP2L1	(+100366)		4
chr7:107220591-107220991	BCAP29	(-413)					4
chr7:115866599-115866999	CAV2	(-272856)	hsa04510:Focal adhesion				4
chr7:115900958-115901358	CAV2	(-238497)	hsa04510:Focal adhesion				4
chr7:115957091-115957491	CAV2	(-182364)	hsa04510:Focal adhesion				4
chr7:116139286-116139701	CAV2	(-161)	hsa04510:Focal adhesion				4
chr7:116312343-116312760	MET	(+93)	BP00063:Protein modification; BP00203:Cell cycle; BP00207:Cell cycle control; BP00285:Cell structure and motility; BP00287:Cell motility; hsa04510:Focal adhesion; hsa04520:Adherens junction; hsa05200:Pathways in cancer; hsa05211:Renal cell carcinoma				4
chr7:116327781-116328263	MET	(+15563)	BP00063:Protein modification; BP00203:Cell cycle; BP00207:Cell cycle control; BP00285:Cell structure and motility; BP00287:Cell motility; hsa04510:Focal adhesion; hsa04520:Adherens junction; hsa05200:Pathways in cancer; hsa05211:Renal cell carcinoma				4
chr7:116442398-116442798	MET	(+130139)	BP00063:Protein modification; BP00203:Cell cycle; BP00207:Cell cycle control; BP00285:Cell structure and motility; BP00287:Cell motility; hsa04510:Focal adhesion; hsa04520:Adherens junction; hsa05200:Pathways in cancer; hsa05211:Renal cell carcinoma				4
chr7:116442918-116443318	MET	(+130659)	BP00063:Protein modification; BP00203:Cell cycle; BP00207:Cell cycle control; BP00285:Cell structure and motility; BP00287:Cell motility; hsa04510:Focal adhesion; hsa04520:Adherens junction; hsa05200:Pathways in cancer; hsa05211:Renal cell carcinoma				4
chr7:120722987-120723387	C7orf58	(+94436)					4
chr7:120724977-120725377	C7orf58	(+96426)					4
chr7:128414317-128414717	OPN1SW	(+1327)					4
chr7:128417153-128417671	OPN1SW	(-1568)					4
chr7:128423243-128423657	OPN1SW	(-7606)					4
chr7:129932874-129933274	CPA4	(+100)					4
chr7:129933457-129933857	CPA4	(+683)					4
chr7:135428977-135429446	FAM180A	(+4382)					4
chr7:149570648-149571385	ATP6V0E2	(+960)					4
chr8:12937846-12938246	DLC1	(+434383)	BP00102:Signal transduction				4
chr8:13051598-13051998	DLC1	(+320631)	BP00102:Signal transduction				4
chr8:13115458-13115858	DLC1	(+256771)	BP00102:Signal transduction				4
chr8:13133168-13133568	DLC1	(+239061)	BP00102:Signal transduction				4
chr8:13224297-13224799	DLC1	(+147881)	BP00102:Signal transduction				4
chr8:21998741-21999141	REEP4	(+507)					4
chr8:27500740-27501140	ESCO2	(-131118)	BP00203:Cell cycle; BP00206:Chromosome segregation; BP00282:Mitosis				4
chr8:27530660-27531060	ESCO2	(-101198)	BP00203:Cell cycle; BP00206:Chromosome segregation; BP00282:Mitosis				4
chr8:32579187-32579636	NRG1	(+173684)	BP00102:Signal transduction; BP00108:Receptor protein tyrosine kinase signaling pathway; BP00193:Developmental processes; BP00224:Cell proliferation and differentiation; BP00274:Cell communication				4
chr8:32608097-32608497	NRG1	(+202569)	BP00102:Signal transduction; BP00108:Receptor protein tyrosine kinase signaling pathway; BP00193:Developmental processes; BP00224:Cell proliferation and differentiation; BP00274:Cell communication				4
chr8:42033888-42034288	PLAT	(+31106)					4
chr8:42037688-42038088	PLAT	(+27306)					4
chr8:67434296-67434717	MYBL1	(+90973)	BP00203:Cell cycle; BP00207:Cell cycle control				4
chr8:67434956-67435417	MYBL1	(+90293)	BP00203:Cell cycle; BP00207:Cell cycle control				4
chr8:105655410-105655810	LRP12	(-54358)					4
chr8:118822942-118823342	EXT1	(+300916)	BP00009:Other polysaccharide metabolism; BP00063:Protein modification; BP00067:Protein glycosylation				4
chr8:118843582-118843982	EXT1	(+280276)	BP00009:Other polysaccharide metabolism; BP00063:Protein modification; BP00067:Protein glycosylation				4
chr8:119119558-119119958	EXT1	(+4300)	BP00009:Other polysaccharide metabolism; BP00063:Protein modification; BP00067:Protein glycosylation				4
chr8:119945397-119945797	EXT1	(-821539)	BP00009:Other polysaccharide metabolism; BP00063:Protein modification; BP00067:Protein glycosylation	TNFRSF11B	(+18786)		4
chr8:144718484-144718977	TSTA3	(-18999)		ZNF623	(-13223)		4
chr8:145582555-145582955	FBXL6	(-572)		GPR172A	(+479)	BP00102:Signal transduction	4
chr9:694617-695034	KANK1	(+190123)					4
chr9:6498616-6499016	GLDC	(+146876)					4
chr9:6511646-6512046	GLDC	(+133846)					4
chr9:6528093-6528493	GLDC	(+117399)					4
chr9:18674840-18675240	ADAMTSL1	(+200961)					4
chr9:18861926-18862326	ADAMTSL1	(+388047)					4
chr9:36191659-36192059	CLTA	(+1006)	hsa04142:Lysosome				4
chr9:91091344-91091744	SPIN1	(+88247)					4
chr9:91149919-91150348	SPIN1	(+146837)					4
chr9:91152279-91152679	SPIN1	(+149182)					4
chr9:96442897-96443297	PHF2	(+104188)					4
chr9:100781274-100781674	ANP32B	(+35985)					4
chr9:101984803-101985203	SEC61B	(+433)					4
chr9:111774633-111775248	CTNNAL1	(+823)	BP00285:Cell structure and motility; BP00286:Cell structure; BP00287:Cell motility				4
chr9:130578296-130578696	FPGS	(+13342)					4
chr9:131028053-131028453	GOLGA2	(+10015)					4
chr9:131029453-131029853	GOLGA2	(+8615)					4
chr9:131030463-131030863	GOLGA2	(+7605)					4
chr9:131863277-131863677	CRAT	(+9593)					4
chr9:139391197-139391597	SEC16A	(-13890)					4
chr10:644587-644987	DIP2C	(+90821)					4
chr10:850575-850975	DIP2C	(-115167)					4
chr10:852344-852744	DIP2C	(-116936)					4
chr10:33179441-33179841	ITGB1	(+67652)	BP00102:Signal transduction; BP00120:Cell adhesion-mediated signaling; BP00124:Cell adhesion; BP00274:Cell communication; BP00275:Extracellular matrix protein-mediated signaling; BP00285:Cell structure and motility; BP00287:Cell motility; hsa04360:Axon guidance; hsa04510:Focal adhesion; hsa04514:Cell adhesion molecules (CAMs); hsa04670:Leukocyte transendothelial migration; hsa04810:Regulation of …				4
chr10:33180185-33180791	ITGB1	(+66805)	BP00102:Signal transduction; BP00120:Cell adhesion-mediated signaling; BP00124:Cell adhesion; BP00274:Cell communication; BP00275:Extracellular matrix protein-mediated signaling; BP00285:Cell structure and motility; BP00287:Cell motility; hsa04360:Axon guidance; hsa04510:Focal adhesion; hsa04514:Cell adhesion molecules (CAMs); hsa04670:Leukocyte transendothelial migration; hsa04810:Regulation of …				4
chr10:33182288-33182831	ITGB1	(+64733)	BP00102:Signal transduction; BP00120:Cell adhesion-mediated signaling; BP00124:Cell adhesion; BP00274:Cell communication; BP00275:Extracellular matrix protein-mediated signaling; BP00285:Cell structure and motility; BP00287:Cell motility; hsa04360:Axon guidance; hsa04510:Focal adhesion; hsa04514:Cell adhesion molecules (CAMs); hsa04670:Leukocyte transendothelial migration; hsa04810:Regulation of …				4
chr10:33208712-33209112	ITGB1	(+38381)	BP00102:Signal transduction; BP00120:Cell adhesion-mediated signaling; BP00124:Cell adhesion; BP00274:Cell communication; BP00275:Extracellular matrix protein-mediated signaling; BP00285:Cell structure and motility; BP00287:Cell motility; hsa04360:Axon guidance; hsa04510:Focal adhesion; hsa04514:Cell adhesion molecules (CAMs); hsa04670:Leukocyte transendothelial migration; hsa04810:Regulation of …				4
chr10:33247815-33248472	ITGB1	(-851)	BP00102:Signal transduction; BP00120:Cell adhesion-mediated signaling; BP00124:Cell adhesion; BP00274:Cell communication; BP00275:Extracellular matrix protein-mediated signaling; BP00285:Cell structure and motility; BP00287:Cell motility; hsa04360:Axon guidance; hsa04510:Focal adhesion; hsa04514:Cell adhesion molecules (CAMs); hsa04670:Leukocyte transendothelial migration; hsa04810:Regulation of …				4
chr10:33250875-33251342	ITGB1	(-3816)	BP00102:Signal transduction; BP00120:Cell adhesion-mediated signaling; BP00124:Cell adhesion; BP00274:Cell communication; BP00275:Extracellular matrix protein-mediated signaling; BP00285:Cell structure and motility; BP00287:Cell motility; hsa04360:Axon guidance; hsa04510:Focal adhesion; hsa04514:Cell adhesion molecules (CAMs); hsa04670:Leukocyte transendothelial migration; hsa04810:Regulation of …				4
chr10:33294229-33294769	ITGB1	(-47206)	BP00102:Signal transduction; BP00120:Cell adhesion-mediated signaling; BP00124:Cell adhesion; BP00274:Cell communication; BP00275:Extracellular matrix protein-mediated signaling; BP00285:Cell structure and motility; BP00287:Cell motility; hsa04360:Axon guidance; hsa04510:Focal adhesion; hsa04514:Cell adhesion molecules (CAMs); hsa04670:Leukocyte transendothelial migration; hsa04810:Regulation of …				4
chr10:33536319-33536719	ITGB1	(-289226)	BP00102:Signal transduction; BP00120:Cell adhesion-mediated signaling; BP00124:Cell adhesion; BP00274:Cell communication; BP00275:Extracellular matrix protein-mediated signaling; BP00285:Cell structure and motility; BP00287:Cell motility; hsa04360:Axon guidance; hsa04510:Focal adhesion; hsa04514:Cell adhesion molecules (CAMs); hsa04670:Leukocyte transendothelial migration; hsa04810:Regulation of …				4
chr10:33562299-33562754	ITGB1	(-315234)	BP00102:Signal transduction; BP00120:Cell adhesion-mediated signaling; BP00124:Cell adhesion; BP00274:Cell communication; BP00275:Extracellular matrix protein-mediated signaling; BP00285:Cell structure and motility; BP00287:Cell motility; hsa04360:Axon guidance; hsa04510:Focal adhesion; hsa04514:Cell adhesion molecules (CAMs); hsa04670:Leukocyte transendothelial migration; hsa04810:Regulation of …				4
chr10:33604379-33604779	ITGB1	(-357286)	BP00102:Signal transduction; BP00120:Cell adhesion-mediated signaling; BP00124:Cell adhesion; BP00274:Cell communication; BP00275:Extracellular matrix protein-mediated signaling; BP00285:Cell structure and motility; BP00287:Cell motility; hsa04360:Axon guidance; hsa04510:Focal adhesion; hsa04514:Cell adhesion molecules (CAMs); hsa04670:Leukocyte transendothelial migration; hsa04810:Regulation of …				4
chr10:49646909-49647309	ARHGAP22	(+166029)					4
chr10:49647689-49648089	ARHGAP22	(+165249)					4
chr10:49648609-49649149	ARHGAP22	(+164259)					4
chr10:49650679-49651079	ARHGAP22	(+162259)					4
chr10:49812926-49813416	ARHGAP22	(-33)					4
chr10:49863967-49864411	ARHGAP22	(-51051)					4
chr10:62702581-62703007	CDK1	(+164582)	BP00063:Protein modification; BP00203:Cell cycle; BP00207:Cell cycle control; BP00282:Mitosis; hsa04110:Cell cycle				4
chr10:81904364-81904764	ANXA11	(+60764)					4
chr10:81954294-81954694	ANXA11	(+10834)					4
chr10:92671008-92671408	ANKRD1	(+9824)					4
chr10:92672598-92673158	ANKRD1	(+8154)					4
chr10:92675308-92675708	ANKRD1	(+5524)					4
chr10:92676218-92676618	ANKRD1	(+4614)					4
chr10:101632200-101632909	DNMBP	(+137121)					4
chr10:101736826-101737226	DNMBP	(+32650)					4
chr10:102756721-102757121	LZTS2	(+57)					4
chr10:102767851-102768271	LZTS2	(+11197)		PDZD7	(+22853)		4
chr10:102790783-102791183	PDZD7	(-69)		SFXN3	(-13)		4
chr10:102792026-102792702	PDZD7	(-1450)		SFXN3	(+1368)		4
chr10:102800843-102801332	SFXN3	(+10092)					4
chr10:103335561-103335961	POLL	(+12266)	BP00203:Cell cycle				4
chr10:123872070-123872470	TACC2	(+123581)					4
chr10:129894961-129895361	MKI67	(+29307)					4
chr10:134234880-134235280	INPP5A	(-116273)					4
chr11:892745-893145	CHID1	(+17929)	BP00009:Other polysaccharide metabolism				4
chr11:6639450-6639850	TPP1	(+1042)	hsa04142:Lysosome				4
chr11:33691698-33692098	CD59	(+52375)		C11orf41	(+128021)		4
chr11:33713455-33713855	CD59	(+30618)		C11orf41	(+149778)		4
chr11:33723012-33723645	CD59	(+20944)		C11orf41	(+159452)		4
chr11:33738479-33739039	CD59	(+5514)		C11orf41	(+174882)		4
chr11:33758232-33758632	CD59	(-14159)					4
chr11:35132762-35133162	CD44	(-27455)					4
chr11:35161053-35161553	CD44	(+886)					4
chr11:35214010-35214410	CD44	(+53793)					4
chr11:35254429-35254829	CD44	(+94212)					4
chr11:35255079-35255479	CD44	(+94862)					4
chr11:46317244-46317654	DGKZ	(-65696)					4
chr11:47430493-47430893	SLC39A13	(+647)					4
chr11:57405695-57406108	YPEL4	(+11515)					4
chr11:57414329-57414738	YPEL4	(+2883)					4
chr11:57415919-57416368	YPEL4	(+1273)					4
chr11:58344944-58345686	ZFP91	(-1272)					4
chr11:58909526-58909926	FAM111A	(-2526)					4
chr11:62207692-62208155	AHNAK	(+106408)					4
chr11:62211175-62211575	AHNAK	(+102957)					4
chr11:63706359-63706773	NAA40	(+124)					4
chr11:64122718-64123118	RPS6KA4	(-3707)	BP00063:Protein modification; BP00203:Cell cycle				4
chr11:64140401-64141008	RPS6KA4	(+14080)	BP00063:Protein modification; BP00203:Cell cycle				4
chr11:67008294-67008721	ADRBK1	(-25397)	BP00063:Protein modification				4
chr11:67044924-67045324	ADRBK1	(+11219)	BP00063:Protein modification				4
chr11:67798516-67798916	NDUFS8	(+632)					4
chr11:69066059-69066750	CCND1	(-389468)	BP00203:Cell cycle; BP00207:Cell cycle control; BP00282:Mitosis; hsa04110:Cell cycle; hsa04510:Focal adhesion; hsa05200:Pathways in cancer; hsa05219:Bladder cancer				4
chr11:69069488-69069940	CCND1	(-386159)	BP00203:Cell cycle; BP00207:Cell cycle control; BP00282:Mitosis; hsa04110:Cell cycle; hsa04510:Focal adhesion; hsa05200:Pathways in cancer; hsa05219:Bladder cancer				4
chr11:69166852-69167252	CCND1	(-288821)	BP00203:Cell cycle; BP00207:Cell cycle control; BP00282:Mitosis; hsa04110:Cell cycle; hsa04510:Focal adhesion; hsa05200:Pathways in cancer; hsa05219:Bladder cancer				4
chr11:69234761-69235161	CCND1	(-220912)	BP00203:Cell cycle; BP00207:Cell cycle control; BP00282:Mitosis; hsa04110:Cell cycle; hsa04510:Focal adhesion; hsa05200:Pathways in cancer; hsa05219:Bladder cancer				4
chr11:69258614-69259014	CCND1	(-197059)	BP00203:Cell cycle; BP00207:Cell cycle control; BP00282:Mitosis; hsa04110:Cell cycle; hsa04510:Focal adhesion; hsa05200:Pathways in cancer; hsa05219:Bladder cancer				4
chr11:69333054-69333456	CCND1	(-122618)	BP00203:Cell cycle; BP00207:Cell cycle control; BP00282:Mitosis; hsa04110:Cell cycle; hsa04510:Focal adhesion; hsa05200:Pathways in cancer; hsa05219:Bladder cancer				4
chr11:69456745-69457374	CCND1	(+1187)	BP00203:Cell cycle; BP00207:Cell cycle control; BP00282:Mitosis; hsa04110:Cell cycle; hsa04510:Focal adhesion; hsa05200:Pathways in cancer; hsa05219:Bladder cancer				4
chr11:69457905-69458334	CCND1	(+2247)	BP00203:Cell cycle; BP00207:Cell cycle control; BP00282:Mitosis; hsa04110:Cell cycle; hsa04510:Focal adhesion; hsa05200:Pathways in cancer; hsa05219:Bladder cancer				4
chr11:69981508-69981908	FADD	(-67561)	hsa05200:Pathways in cancer				4
chr11:70049923-70050375	FADD	(+880)	hsa05200:Pathways in cancer				4
chr11:70245368-70246199	CTTN	(+1172)	BP00285:Cell structure and motility; hsa04530:Tight junction; hsa05130:Pathogenic Escherichia coli infection				4
chr11:70283173-70283573	CTTN	(+38761)	BP00285:Cell structure and motility; hsa04530:Tight junction; hsa05130:Pathogenic Escherichia coli infection				4
chr11:73035879-73036279	ARHGEF17	(+16416)					4
chr11:95523328-95523728	CEP57	(-97)					4
chr11:111784519-111785094	CRYAB	(-2334)					4
chr11:118971916-118972316	DPAGT1	(+669)	BP00009:Other polysaccharide metabolism; BP00063:Protein modification; BP00067:Protein glycosylation				4
chr11:119208260-119208924	RNF26	(+3382)	BP00063:Protein modification				4
chr11:122029728-122030128	BLID	(-43005)					4
chr11:122073675-122074075	BLID	(-86952)					4
chr11:131780905-131781305	NTM	(+393)	BP00124:Cell adhesion; BP00193:Developmental processes				4
chr12:6309207-6309800	CD9	(+22)	BP00285:Cell structure and motility; BP00287:Cell motility				4
chr12:8792032-8792432	MFAP5	(+23201)	BP00285:Cell structure and motility				4
chr12:8796211-8796611	MFAP5	(+19022)	BP00285:Cell structure and motility				4
chr12:25353722-25354122	LYRM5	(+5772)					4
chr12:25355222-25355770	LYRM5	(+7346)					4
chr12:27702595-27702995	PPFIBP1	(+25750)					4
chr12:49523482-49523882	TUBA1B	(+1622)	BP00203:Cell cycle; BP00206:Chromosome segregation; BP00282:Mitosis; BP00285:Cell structure and motility; BP00286:Cell structure; BP00287:Cell motility; hsa05130:Pathogenic Escherichia coli infection				4
chr12:49524432-49524832	TUBA1B	(+672)	BP00203:Cell cycle; BP00206:Chromosome segregation; BP00282:Mitosis; BP00285:Cell structure and motility; BP00286:Cell structure; BP00287:Cell motility; hsa05130:Pathogenic Escherichia coli infection				4
chr12:51663861-51664955	SMAGP	(-206)					4
chr12:51787984-51788422	GALNT6	(-3003)	BP00009:Other polysaccharide metabolism; BP00063:Protein modification; BP00067:Protein glycosylation				4
chr12:52541227-52541627	KRT80	(+44357)	BP00285:Cell structure and motility; BP00286:Cell structure				4
chr12:52579770-52580170	KRT80	(+5814)	BP00285:Cell structure and motility; BP00286:Cell structure				4
chr12:52583530-52583930	KRT80	(+2054)	BP00285:Cell structure and motility; BP00286:Cell structure				4
chr12:52584550-52584950	KRT80	(+1034)	BP00285:Cell structure and motility; BP00286:Cell structure				4
chr12:53900117-53900517	NPFF	(+1105)					4
chr12:53900767-53901167	NPFF	(+455)					4
chr12:56110095-56110495	RDH5	(-3856)		BLOC1S1	(+477)		4
chr12:56651294-56651694	COQ10A	(-9148)					4
chr12:56916433-56916833	BAZ2A	(+113530)	BP00273:Chromatin packaging and remodeling				4
chr12:56998633-56999033	BAZ2A	(+31330)	BP00273:Chromatin packaging and remodeling				4
chr12:65782705-65783105	HMGA2	(-435335)	BP00203:Cell cycle; BP00206:Chromosome segregation; BP00282:Mitosis				4
chr12:65864733-65865236	HMGA2	(-353255)	BP00203:Cell cycle; BP00206:Chromosome segregation; BP00282:Mitosis				4
chr12:65959253-65959653	HMGA2	(-258787)	BP00203:Cell cycle; BP00206:Chromosome segregation; BP00282:Mitosis				4
chr12:66135583-66136193	HMGA2	(-82352)	BP00203:Cell cycle; BP00206:Chromosome segregation; BP00282:Mitosis				4
chr12:66218541-66219040	HMGA2	(+551)	BP00203:Cell cycle; BP00206:Chromosome segregation; BP00282:Mitosis				4
chr12:66219690-66220410	HMGA2	(+1810)	BP00203:Cell cycle; BP00206:Chromosome segregation; BP00282:Mitosis				4
chr12:75874379-75874789	GLIPR1	(+71)					4
chr12:75904719-75905119	KRR1	(+499)					4
chr12:80222860-80223260	PPP1R12A	(+105918)	BP00063:Protein modification; BP00064:Protein phosphorylation; hsa04270:Vascular smooth muscle contraction; hsa04510:Focal adhesion; hsa04810:Regulation of actin cytoskeleton				4
chr12:80330420-80330820	PPP1R12A	(-1642)	BP00063:Protein modification; BP00064:Protein phosphorylation; hsa04270:Vascular smooth muscle contraction; hsa04510:Focal adhesion; hsa04810:Regulation of actin cytoskeleton				4
chr12:109032493-109032893	CORO1C	(+92602)	BP00203:Cell cycle; BP00282:Mitosis; BP00285:Cell structure and motility; BP00286:Cell structure; BP00287:Cell motility				4
chr12:109034851-109035251	CORO1C	(+90244)	BP00203:Cell cycle; BP00282:Mitosis; BP00285:Cell structure and motility; BP00286:Cell structure; BP00287:Cell motility				4
chr12:109085357-109085757	CORO1C	(+39738)	BP00203:Cell cycle; BP00282:Mitosis; BP00285:Cell structure and motility; BP00286:Cell structure; BP00287:Cell motility				4
chr12:109090484-109090884	CORO1C	(+34611)	BP00203:Cell cycle; BP00282:Mitosis; BP00285:Cell structure and motility; BP00286:Cell structure; BP00287:Cell motility				4
chr12:109219938-109220479	CORO1C	(-94914)	BP00203:Cell cycle; BP00282:Mitosis; BP00285:Cell structure and motility; BP00286:Cell structure; BP00287:Cell motility				4
chr12:109231930-109232449	CORO1C	(-106895)	BP00203:Cell cycle; BP00282:Mitosis; BP00285:Cell structure and motility; BP00286:Cell structure; BP00287:Cell motility				4
chr12:109248689-109249089	CORO1C	(-123594)	BP00203:Cell cycle; BP00282:Mitosis; BP00285:Cell structure and motility; BP00286:Cell structure; BP00287:Cell motility				4
chr12:118499133-118499539	WSB2	(-385)					4
chr12:118499979-118500455	WSB2	(-1266)					4
chr12:120668548-120668963	PXN	(+34818)	BP00285:Cell structure and motility; BP00287:Cell motility; hsa04510:Focal adhesion; hsa04810:Regulation of actin cytoskeleton				4
chr12:120672575-120673053	PXN	(+30760)	BP00285:Cell structure and motility; BP00287:Cell motility; hsa04510:Focal adhesion; hsa04810:Regulation of actin cytoskeleton				4
chr12:120676378-120676778	PXN	(+26996)	BP00285:Cell structure and motility; BP00287:Cell motility; hsa04510:Focal adhesion; hsa04810:Regulation of actin cytoskeleton				4
chr12:120700802-120701265	PXN	(+2540)	BP00285:Cell structure and motility; BP00287:Cell motility; hsa04510:Focal adhesion; hsa04810:Regulation of actin cytoskeleton				4
chr12:133404434-133404894	GOLGA3	(+624)					4
chr13:21544690-21545128	LATS2	(+90813)	BP00063:Protein modification; BP00064:Protein phosphorylation; BP00102:Signal transduction; BP00111:Intracellular signaling cascade; BP00119:Other intracellular signaling cascade; BP00203:Cell cycle; BP00207:Cell cycle control; BP00224:Cell proliferation and differentiation				4
chr13:27936168-27936568	GTF3A	(-62313)					4
chr13:27998711-27999130	GTF3A	(+240)					4
chr13:27999850-28000250	GTF3A	(+1369)					4
chr13:45080437-45080837	TSC22D1	(+70064)					4
chr13:45114957-45115357	TSC22D1	(+35544)					4
chr13:45288319-45288719	TSC22D1	(-137818)					4
chr13:76209886-76210286	LMO7	(-373)					4
chr13:76212616-76213016	LMO7	(+2357)					4
chr13:76437697-76438134	LMO7	(+227457)					4
chr13:76438786-76439186	LMO7	(+228527)					4
chr13:76440753-76441244	LMO7	(+230540)					4
chr13:76460193-76460593	LMO7	(+249934)					4
chr13:115069807-115070207	UPF3A	(+22948)					4
chr14:23450769-23451275	AJUBA	(+826)					4
chr14:24768117-24768856	DHRS1	(+552)					4
chr14:71708901-71709301	SIPA1L1	(-286928)					4
chr14:72109626-72110026	SIPA1L1	(+113797)					4
chr14:72209315-72209715	SIPA1L1	(+213486)					4
chr14:90420743-90421525	TDP1	(-1112)					4
chr14:90422073-90422532	TDP1	(+57)					4
chr14:90747651-90748051	C14orf102	(+50630)					4
chr14:91709967-91710367	GPR68	(+685)	BP00102:Signal transduction				4
chr14:91719473-91719873	GPR68	(-8821)	BP00102:Signal transduction				4
chr14:96722364-96722764	BDKRB1	(+17)	hsa04810:Regulation of actin cytoskeleton				4
chr14:96830231-96830631	BDKRB1	(+107884)	hsa04810:Regulation of actin cytoskeleton				4
chr14:102276400-102276887	PPP2R5C	(+48509)	BP00063:Protein modification				4
chr14:102395410-102395810	PPP2R5C	(+167475)	BP00063:Protein modification				4
chr14:102692332-102692732	MOK	(+78999)					4
chr14:102692802-102693202	MOK	(+78529)					4
chr14:105147043-105147676	INF2	(-8583)					4
chr14:105292489-105292999	KIAA0284	(-38906)					4
chr15:34658427-34659153	LPCAT4	(+605)					4
chr15:40211015-40211456	GPR176	(+1857)					4
chr15:41264420-41264841	INO80	(+143709)	BP00273:Chromatin packaging and remodeling				4
chr15:44084794-44085576	SERF2	(+1011)					4
chr15:44089196-44089634	SERF2	(+5241)					4
chr15:63143167-63143567	TPM1	(-191471)	BP00285:Cell structure and motility; BP00286:Cell structure; BP00287:Cell motility; hsa05410:Hypertrophic cardiomyopathy (HCM); hsa05414:Dilated cardiomyopathy				4
chr15:66797472-66797914	ZWILCH	(+262)					4
chr15:72509503-72509903	PKM2	(-14698)		PKM2	(+14024)		4
chr15:72524430-72524892	PKM2	(-934)					4
chr15:74753515-74753915	SEMA7A	(-27416)					4
chr15:75079811-75080211	CSK	(+5586)	BP00063:Protein modification; BP00203:Cell cycle; BP00207:Cell cycle control; hsa04810:Regulation of actin cytoskeleton				4
chr15:75096599-75096999	CSK	(+22374)	BP00063:Protein modification; BP00203:Cell cycle; BP00207:Cell cycle control; hsa04810:Regulation of actin cytoskeleton				4
chr15:80842327-80842815	ARNT2	(+145879)	hsa05200:Pathways in cancer; hsa05211:Renal cell carcinoma				4
chr15:81071522-81071965	KIAA1199	(+32)					4
chr15:81081630-81082030	KIAA1199	(+10118)					4
chr15:81092932-81093332	KIAA1199	(+21420)					4
chr15:81225430-81225842	KIAA1199	(+153924)					4
chr15:81244320-81244720	KIAA1199	(+172808)					4
chr15:83956171-83956612	BNC1	(-2924)					4
chr15:89180016-89180501	ISG20	(-1780)					4
chr15:89746819-89747219	ABHD2	(+115638)					4
chr15:89747649-89748049	ABHD2	(+116468)					4
chr15:89748099-89748499	ABHD2	(+116918)					4
chr16:578576-579001	SOLH	(+933)					4
chr16:1728454-1728854	HN1L	(+376)					4
chr16:2058038-2058458	ZNF598	(+1515)	BP00063:Protein modification				4
chr16:24950572-24950972	ARHGAP17	(+75903)	BP00285:Cell structure and motility; BP00286:Cell structure				4
chr16:25000008-25000408	ARHGAP17	(+26467)	BP00285:Cell structure and motility; BP00286:Cell structure				4
chr16:25060207-25060616	ARHGAP17	(-33737)	BP00285:Cell structure and motility; BP00286:Cell structure				4
chr16:25117764-25118164	ARHGAP17	(-91289)	BP00285:Cell structure and motility; BP00286:Cell structure				4
chr16:28914143-28914543	RABEP2	(+22189)					4
chr16:31191716-31192165	FUS	(+510)					4
chr16:57791147-57791547	KIFC3	(+45092)	BP00285:Cell structure and motility; BP00286:Cell structure				4
chr16:57820189-57820589	KIFC3	(+16050)	BP00285:Cell structure and motility; BP00286:Cell structure				4
chr16:64944100-64944500	CDH11	(+211619)					4
chr16:67555149-67555549	FAM65A	(-8191)					4
chr16:67881345-67881775	CENPT	(-199)		NUTF2	(+741)		4
chr16:88761749-88762149	RNF166	(+10880)					4
chr16:88833898-88834298	PIEZO1	(+17274)					4
chr16:88851088-88851509	PIEZO1	(+73)					4
chr17:1013267-1013667	ABR	(+69664)					4
chr17:1014555-1014967	ABR	(+68370)					4
chr17:1364532-1364932	MYO1C	(+31269)					4
chr17:1366042-1366442	MYO1C	(+29759)					4
chr17:1366592-1366992	MYO1C	(+29209)					4
chr17:1390142-1390568	MYO1C	(+5646)					4
chr17:1391520-1391938	MYO1C	(+4272)					4
chr17:4846179-4846579	RNF167	(+2749)					4
chr17:4851229-4851629	ENO3	(-2955)		PFN1	(+396)	hsa04810:Regulation of actin cytoskeleton	4
chr17:12893182-12893582	ELAC2	(+27999)					4
chr17:13465448-13465848	ELAC2	(-544267)		HS3ST3A1	(+39596)	BP00009:Other polysaccharide metabolism; BP00063:Protein modification	4
chr17:16318755-16319155	TRPV2	(+99)					4
chr17:16924549-16924949	MPRIP	(-143225)	BP00285:Cell structure and motility; BP00286:Cell structure				4
chr17:17094743-17095143	MPRIP	(+26969)	BP00285:Cell structure and motility; BP00286:Cell structure				4
chr17:17139760-17140160	FLCN	(+542)	hsa05211:Renal cell carcinoma				4
chr17:18139015-18139415	FLII	(+22840)	BP00193:Developmental processes; BP00242:Embryogenesis				4
chr17:18139915-18140315	FLII	(+21940)	BP00193:Developmental processes; BP00242:Embryogenesis				4
chr17:18145613-18146013	FLII	(+16242)	BP00193:Developmental processes; BP00242:Embryogenesis				4
chr17:18161178-18161578	FLII	(+677)	BP00193:Developmental processes; BP00242:Embryogenesis				4
chr17:18907144-18907587	SLC5A10	(+51888)					4
chr17:26674391-26675007	POLDIP2	(+9904)					4
chr17:26675061-26675461	POLDIP2	(+9342)					4
chr17:26676011-26676411	POLDIP2	(+8392)					4
chr17:26677301-26677701	POLDIP2	(+7102)					4
chr17:26973198-26973598	KIAA0100	(-1221)					4
chr17:34889996-34890396	MYO19	(+1109)	BP00285:Cell structure and motility; BP00286:Cell structure; BP00287:Cell motility				4
chr17:36585195-36585617	ARHGAP23	(+686)					4
chr17:36610637-36611037	ARHGAP23	(+26117)					4
chr17:36665735-36666135	ARHGAP23	(+81215)					4
chr17:36667095-36667495	ARHGAP23	(+82575)					4
chr17:41909981-41910395	MPP3	(+359)					4
chr17:48423961-48424471	XYLT2	(+823)	BP00063:Protein modification; BP00067:Protein glycosylation				4
chr17:48456861-48457261	EME1	(+6480)					4
chr17:48457561-48458220	EME1	(+7310)					4
chr17:57776111-57776546	CLTC	(+79279)	hsa04142:Lysosome				4
chr17:62525260-62525660	CEP95	(+22302)		SMURF2	(+132926)		4
chr17:62529130-62529530	CEP95	(+26172)		SMURF2	(+129056)		4
chr17:62529700-62530100	CEP95	(+26742)		SMURF2	(+128486)		4
chr17:62534827-62535227	CEP95	(+31869)		SMURF2	(+123359)		4
chr17:62583594-62583994	SMURF2	(+74592)		CEP95	(+80636)		4
chr17:62584164-62584564	SMURF2	(+74022)		CEP95	(+81206)		4
chr17:62656160-62656560	SMURF2	(+2026)		CEP95	(+153202)		4
chr17:62658449-62658870	SMURF2	(-274)					4
chr17:73495403-73495803	KIAA0195	(+42939)					4
chr17:74368527-74368927	SPHK1	(-11963)	BP00102:Signal transduction; BP00224:Cell proliferation and differentiation; hsa04020:Calcium signaling pathway; hsa04666:Fc gamma R-mediated phagocytosis				4
chr17:74444190-74444670	SPHK1	(+63740)	BP00102:Signal transduction; BP00224:Cell proliferation and differentiation; hsa04020:Calcium signaling pathway; hsa04666:Fc gamma R-mediated phagocytosis				4
chr17:76930014-76930470	TIMP2	(-8770)					4
chr17:76968606-76969006	TIMP2	(-47334)					4
chr17:78976269-78976669	BAIAP2	(-32478)	hsa04810:Regulation of actin cytoskeleton				4
chr17:79070987-79071657	BAIAP2	(+62375)	hsa04810:Regulation of actin cytoskeleton				4
chr18:5294814-5295214	ZFP161	(+1180)					4
chr18:12282405-12282805	TUBB6	(-25652)	BP00203:Cell cycle; BP00206:Chromosome segregation; BP00282:Mitosis; BP00285:Cell structure and motility; BP00286:Cell structure; BP00287:Cell motility; hsa05130:Pathogenic Escherichia coli infection				4
chr18:12287881-12288281	TUBB6	(-20176)	BP00203:Cell cycle; BP00206:Chromosome segregation; BP00282:Mitosis; BP00285:Cell structure and motility; BP00286:Cell structure; BP00287:Cell motility; hsa05130:Pathogenic Escherichia coli infection				4
chr18:12327785-12328273	TUBB6	(+19772)	BP00203:Cell cycle; BP00206:Chromosome segregation; BP00282:Mitosis; BP00285:Cell structure and motility; BP00286:Cell structure; BP00287:Cell motility; hsa05130:Pathogenic Escherichia coli infection				4
chr18:21106804-21107204	NPC1	(+59577)	hsa04142:Lysosome				4
chr18:42828580-42828980	SLC14A1	(-475312)					4
chr18:43303987-43304404	SLC14A1	(+104)					4
chr18:43307097-43307497	SIGLEC15	(-98248)		SLC14A1	(+3205)		4
chr18:43328687-43329087	SIGLEC15	(-76658)		SLC14A1	(+24795)		4
chr18:43329167-43329647	SIGLEC15	(-76138)		SLC14A1	(+25315)		4
chr18:43330007-43330507	SIGLEC15	(-75288)		SLC14A1	(+26165)		4
chr18:43332517-43332917	SIGLEC15	(-72828)		SLC14A1	(+28625)		4
chr18:43351297-43351697	SIGLEC15	(-54048)		SLC14A1	(+47405)		4
chr18:43354376-43354777	SIGLEC15	(-50968)		SLC14A1	(+50485)		4
chr18:43363267-43363766	SIGLEC15	(-42028)		SLC14A1	(+59425)		4
chr18:43382577-43382977	SIGLEC15	(-22768)		SLC14A1	(+78685)		4
chr18:43421468-43421921	SIGLEC15	(+16150)		EPG5	(+125610)		4
chr18:43424498-43424898	SIGLEC15	(+19153)		EPG5	(+122607)		4
chr18:43427128-43427528	SIGLEC15	(+21783)		EPG5	(+119977)		4
chr18:43534438-43534838	EPG5	(+12667)		SIGLEC15	(+129093)		4
chr18:55470320-55470802	ATP8B1	(-234)					4
chr19:342826-343226	MIER2	(+1765)					4
chr19:343406-343806	MIER2	(+1185)					4
chr19:344819-345219	MIER2	(-228)					4
chr19:1855106-1855828	KLF16	(+8097)					4
chr19:2151376-2151789	AP3D1	(-27)	hsa04142:Lysosome				4
chr19:2151856-2152256	AP3D1	(-500)	hsa04142:Lysosome				4
chr19:2231637-2232093	SF3A2	(-4951)					4
chr19:2232140-2232540	SF3A2	(-4476)					4
chr19:2232737-2233520	SF3A2	(-3687)					4
chr19:2233767-2234167	SF3A2	(-2849)					4
chr19:2236707-2237107	SF3A2	(+91)					4
chr19:3505732-3506148	FZR1	(-17014)	BP00203:Cell cycle; BP00207:Cell cycle control; hsa04110:Cell cycle				4
chr19:3526095-3526495	FZR1	(+3341)	BP00203:Cell cycle; BP00207:Cell cycle control; hsa04110:Cell cycle				4
chr19:3552915-3553315	FZR1	(+30161)	BP00203:Cell cycle; BP00207:Cell cycle control; hsa04110:Cell cycle				4
chr19:3951171-3951571	DAPK3	(+18456)	BP00063:Protein modification; BP00064:Protein phosphorylation; hsa05200:Pathways in cancer; hsa05219:Bladder cancer				4
chr19:3955711-3956111	DAPK3	(+13916)	BP00063:Protein modification; BP00064:Protein phosphorylation; hsa05200:Pathways in cancer; hsa05219:Bladder cancer				4
chr19:3968607-3969007	DAPK3	(+1020)	BP00063:Protein modification; BP00064:Protein phosphorylation; hsa05200:Pathways in cancer; hsa05219:Bladder cancer				4
chr19:3982214-3982614	DAPK3	(-12587)	BP00063:Protein modification; BP00064:Protein phosphorylation; hsa05200:Pathways in cancer; hsa05219:Bladder cancer				4
chr19:4654696-4655287	C19orf10	(+15423)					4
chr19:4852002-4852442	PLIN3	(+15558)					4
chr19:4910934-4911432	UHRF1	(+1673)	BP00203:Cell cycle				4
chr19:4911680-4912362	UHRF1	(+2511)	BP00203:Cell cycle				4
chr19:11491614-11492085	EPOR	(+3168)					4
chr19:11546767-11547171	PRKCSH	(+700)	BP00063:Protein modification; BP00067:Protein glycosylation				4
chr19:15225367-15225767	SYDE1	(+7353)					4
chr19:16435589-16435989	KLF2	(+138)					4
chr19:16439591-16440171	KLF2	(+4230)					4
chr19:17190641-17191041	MYO9B	(+4250)	BP00102:Signal transduction; BP00111:Intracellular signaling cascade; BP00285:Cell structure and motility; BP00286:Cell structure				4
chr19:17218661-17219157	MYO9B	(+32318)	BP00102:Signal transduction; BP00111:Intracellular signaling cascade; BP00285:Cell structure and motility; BP00286:Cell structure				4
chr19:17246073-17246560	MYO9B	(+59726)	BP00102:Signal transduction; BP00111:Intracellular signaling cascade; BP00285:Cell structure and motility; BP00286:Cell structure				4
chr19:39149066-39149636	ACTN4	(+11084)	BP00285:Cell structure and motility; BP00286:Cell structure; hsa04510:Focal adhesion; hsa04810:Regulation of actin cytoskeleton; hsa05322:Systemic lupus erythematosus	CAPN12	(+85763)		4
chr19:39174520-39175256	ACTN4	(+36621)	BP00285:Cell structure and motility; BP00286:Cell structure; hsa04510:Focal adhesion; hsa04810:Regulation of actin cytoskeleton; hsa05322:Systemic lupus erythematosus	CAPN12	(+60226)		4
chr19:39225576-39225976	CAPN12	(+9338)		ACTN4	(+87509)	BP00285:Cell structure and motility; BP00286:Cell structure; hsa04510:Focal adhesion; hsa04810:Regulation of actin cytoskeleton; hsa05322:Systemic lupus erythematosus	4
chr19:41076466-41076866	SHKBP1	(-6091)					4
chr19:41731663-41732408	HNRNPUL1	(-38084)		AXL	(+6928)	BP00063:Protein modification	4
chr19:41734433-41734833	HNRNPUL1	(-35487)		AXL	(+9525)	BP00063:Protein modification	4
chr19:41767507-41767907	HNRNPUL1	(-2413)					4
chr19:45850902-45851302	KLC3	(+7104)		ERCC2	(+22743)		4
chr19:45851552-45851952	KLC3	(+7754)		ERCC2	(+22093)		4
chr19:46012606-46013006	VASP	(+2118)	hsa04510:Focal adhesion				4
chr19:48832427-48833088	TMEM143	(+34428)					4
chr19:48837077-48837477	TMEM143	(+29909)					4
chr19:49594801-49595201	LIN7B	(-22617)	BP00285:Cell structure and motility; BP00286:Cell structure	SNRNP70	(+6536)		4
chr19:49617911-49618441	LIN7B	(+558)	BP00285:Cell structure and motility; BP00286:Cell structure				4
chr19:50412336-50412736	IL4I1	(-12389)					4
chr19:50486780-50487180	SIGLEC11	(-22551)					4
chr19:54692936-54693336	MBOAT7	(+597)					4
chr19:56111291-56111691	FIZ1	(-598)					4
chr20:9048361-9048770	PLCB4	(-239881)					4
chr20:9267081-9267481	PLCB4	(-21166)					4
chr20:9465171-9465571	PLCB4	(+176924)					4
chr20:9467521-9468001	PLCB4	(+179314)					4
chr20:19765241-19765720	RIN2	(-101684)	BP00136:Other intracellular protein traffic				4
chr20:19870128-19870528	RIN2	(+3163)	BP00136:Other intracellular protein traffic				4
chr20:19955641-19956169	RIN2	(+88740)	BP00136:Other intracellular protein traffic				4
chr20:31037248-31037648	ASXL1	(+91301)					4
chr20:36154667-36155140	BLCAP	(+1179)					4
chr20:36155402-36155820	BLCAP	(+472)					4
chr20:52838748-52839148	DOK5	(-253318)					4
chr20:57565966-57566566	TH1L	(+9955)		CTSZ	(+16043)	hsa04142:Lysosome	4
chr20:57568376-57568840	TH1L	(+12297)		CTSZ	(+13701)	hsa04142:Lysosome	4
chr20:62496975-62497388	TPD52L2	(+601)					4
chr21:48078739-48079139	PRMT2	(+23432)	BP00063:Protein modification				4
chr22:18268484-18268884	MICAL3	(+238641)					4
chr22:18506271-18506769	MICAL3	(+805)					4
chr22:20863480-20863984	MED15	(+1846)					4
chr22:20885455-20886501	MED15	(+24092)					4
chr22:20891885-20892285	MED15	(+30199)					4
chr22:20942824-20943245	MED15	(+81149)					4
chr22:20943445-20944274	MED15	(+81974)					4
chr22:22006320-22006720	PPIL2	(-13753)		SDF2L1	(+9978)	BP00063:Protein modification; BP00067:Protein glycosylation	4
chr22:22011660-22012078	PPIL2	(-8404)		SDF2L1	(+15327)	BP00063:Protein modification; BP00067:Protein glycosylation	4
chr22:22272263-22272663	PPM1F	(+34787)	BP00063:Protein modification				4
chr22:29999868-30000268	NF2	(+523)	BP00285:Cell structure and motility; BP00286:Cell structure				4
chr22:30632010-30632410	LIF	(+10586)					4
chr22:30635174-30635774	LIF	(+7322)					4
chr22:30641781-30642181	LIF	(+815)					4
chr22:31477857-31478420	SMTN	(-707)					4
chr22:31500767-31501167	SMTN	(+22121)					4
chr22:31501660-31502060	SMTN	(+23014)					4
chr22:32339975-32340388	YWHAH	(-297)	BP00203:Cell cycle; hsa04110:Cell cycle				4
chr22:32340565-32341238	YWHAH	(+423)	BP00203:Cell cycle; hsa04110:Cell cycle	C22orf24	(+434)		4
chr22:38072582-38072982	NOL12	(-9562)		LGALS1	(+1169)		4
chr22:38172506-38172906	TRIOBP	(+79711)	BP00285:Cell structure and motility; BP00286:Cell structure				4
chr22:38173086-38173550	TRIOBP	(+80323)	BP00285:Cell structure and motility; BP00286:Cell structure				4
chr22:50946497-50946897	LMF2	(-562)					4
chrX:48345923-48346443	PORCN	(-21989)		FTSJ1	(+11634)		4
chrX:118739561-118739961	NKRF	(+85)					4
chrX:153640156-153640652	TAZ	(+527)					4
chr1:2518459-2518867	FAM213B	(+474)					6
chr1:14076106-14076506	KAZN	(-848907)					6
chr1:14116287-14116687	KAZN	(-808726)					6
chr1:14122477-14122877	KAZN	(-802536)					6
chr1:14127510-14127910	KAZN	(-797503)					6
chr1:14925057-14925519	KAZN	(+75)					6
chr1:14925872-14926272	KAZN	(+859)					6
chr1:21058701-21059186	HP1BP3	(+54237)					6
chr1:27071271-27071671	ARID1A	(+48949)	BP00031:Nucleoside, nucleotide and nucleic acid metabolism				6
chr1:27097686-27098086	ARID1A	(+75364)	BP00031:Nucleoside, nucleotide and nucleic acid metabolism				6
chr1:43160589-43160989	YBX1	(+12723)	BP00031:Nucleoside, nucleotide and nucleic acid metabolism				6
chr1:43390518-43390966	SLC2A1	(+34105)	hsa04920:Adipocytokine signaling pathway; hsa05200:Pathways in cancer				6
chr1:43391018-43391514	SLC2A1	(+33581)	hsa04920:Adipocytokine signaling pathway; hsa05200:Pathways in cancer				6
chr1:46712879-46713339	RAD54L	(-258)	BP00031:Nucleoside, nucleotide and nucleic acid metabolism				6
chr1:51442540-51442940	CDKN2C	(+7098)	BP00203:Cell cycle; BP00207:Cell cycle control; hsa04110:Cell cycle				6
chr1:59369101-59369501	JUN	(-119516)	BP00031:Nucleoside, nucleotide and nucleic acid metabolism; BP00203:Cell cycle; BP00207:Cell cycle control; hsa04010:MAPK signaling pathway; hsa04310:Wnt signaling pathway; hsa04662:B cell receptor signaling pathway; hsa04722:Neurotrophin signaling pathway; hsa05200:Pathways in cancer				6
chr1:65906771-65907171	PDE4B	(-351885)	BP00031:Nucleoside, nucleotide and nucleic acid metabolism				6
chr1:66737010-66737410	PDE4B	(+478354)	BP00031:Nucleoside, nucleotide and nucleic acid metabolism				6
chr1:66737590-66737990	PDE4B	(+478934)	BP00031:Nucleoside, nucleotide and nucleic acid metabolism				6
chr1:66797305-66797705	PDE4B	(+538649)	BP00031:Nucleoside, nucleotide and nucleic acid metabolism				6
chr1:66797738-66798278	PDE4B	(+539152)	BP00031:Nucleoside, nucleotide and nucleic acid metabolism				6
chr1:173793021-173793556	DARS2	(-508)					6
chr1:173829172-173829572	DARS2	(+35575)					6
chr1:205669845-205670245	NUCKS1	(+49327)	BP00203:Cell cycle				6
chr1:205680405-205680805	NUCKS1	(+38767)	BP00203:Cell cycle				6
chr1:235280908-235281308	TOMM20	(+11148)					6
chr1:235281558-235281958	TOMM20	(+10498)					6
chr2:10578843-10579243	ODC1	(+9410)					6
chr2:69481042-69481442	ANTXR1	(+240966)					6
chr2:227663447-227663847	IRS1	(-141)	hsa04722:Neurotrophin signaling pathway; hsa04920:Adipocytokine signaling pathway				6
chr2:227673708-227674108	IRS1	(-10402)	hsa04722:Neurotrophin signaling pathway; hsa04920:Adipocytokine signaling pathway				6
chr3:40505964-40506364	RPL14	(+7363)	hsa03010:Ribosome				6
chr3:141031079-141031479	ZBTB38	(-11776)	BP00031:Nucleoside, nucleotide and nucleic acid metabolism				6
chr3:141124953-141125353	ZBTB38	(+82098)	BP00031:Nucleoside, nucleotide and nucleic acid metabolism				6
chr3:141129046-141129446	ZBTB38	(+86191)	BP00031:Nucleoside, nucleotide and nucleic acid metabolism				6
chr4:71858538-71858938	DCK	(-527)	BP00031:Nucleoside, nucleotide and nucleic acid metabolism				6
chr4:174246893-174247293	HMGB2	(+7827)					6
chr4:174247997-174248423	HMGB2	(+6710)					6
chr4:174256245-174256757	HMGB2	(-1581)					6
chr4:186069725-186070125	SLC25A4	(+5508)	BP00031:Nucleoside, nucleotide and nucleic acid metabolism				6
chr5:16661093-16661493	MYO10	(+275092)					6
chr5:16733546-16733946	MYO10	(+202639)					6
chr5:16798106-16798506	MYO10	(+138079)					6
chr5:16809883-16810446	MYO10	(+126220)					6
chr5:16935626-16936043	MYO10	(+550)					6
chr5:65379729-65380129	ERBB2IP	(+157547)					6
chr5:65396102-65396502	ERBB2IP	(+173920)					6
chr5:150473652-150474052	ANXA6	(+63591)					6
chr5:150474102-150474502	ANXA6	(+63141)					6
chr5:150478369-150478769	ANXA6	(+58874)					6
chr5:150531439-150531839	ANXA6	(+5804)					6
chr6:52149247-52149647	MCM3	(+135)	BP00031:Nucleoside, nucleotide and nucleic acid metabolism; BP00203:Cell cycle; hsa04110:Cell cycle				6
chr6:143999513-143999913	PHACTR2	(+611)					6
chr7:32529440-32529840	LSM5	(+383)	BP00031:Nucleoside, nucleotide and nucleic acid metabolism				6
chr8:42129044-42129444	IKBKB	(+424)	hsa04010:MAPK signaling pathway; hsa04662:B cell receptor signaling pathway; hsa04722:Neurotrophin signaling pathway; hsa04920:Adipocytokine signaling pathway; hsa05200:Pathways in cancer				6
chr8:77584987-77585462	ZFHX4	(-8290)	BP00031:Nucleoside, nucleotide and nucleic acid metabolism				6
chr8:77586211-77586611	ZFHX4	(-7104)	BP00031:Nucleoside, nucleotide and nucleic acid metabolism				6
chr8:77589467-77589867	ZFHX4	(-3848)	BP00031:Nucleoside, nucleotide and nucleic acid metabolism				6
chr8:77593822-77594321	ZFHX4	(+557)	BP00031:Nucleoside, nucleotide and nucleic acid metabolism				6
chr8:77714702-77715102	ZFHX4	(+121387)	BP00031:Nucleoside, nucleotide and nucleic acid metabolism				6
chr8:77718272-77718672	ZFHX4	(+124957)	BP00031:Nucleoside, nucleotide and nucleic acid metabolism				6
chr8:77781951-77782351	ZFHX4	(+188636)	BP00031:Nucleoside, nucleotide and nucleic acid metabolism				6
chr8:94929446-94929846	PDP1	(-346)					6
chr8:95907175-95907612	CCNE2	(+88)	BP00203:Cell cycle; BP00207:Cell cycle control; hsa04110:Cell cycle; hsa05200:Pathways in cancer				6
chr8:122621719-122622258	HAS2	(+31641)					6
chr8:123446629-123447029	HAS2	(-793199)					6
chr9:35658695-35659095	CCDC107	(+608)					6
chr9:35662195-35662595	CCDC107	(+4108)					6
chr9:91925909-91926349	CKS2	(+16)					6
chr9:133710291-133710691	ABL1	(-340)	BP00203:Cell cycle; BP00207:Cell cycle control; hsa04110:Cell cycle; hsa04722:Neurotrophin signaling pathway; hsa05200:Pathways in cancer				6
chr9:133717965-133718365	ABL1	(+7334)	BP00203:Cell cycle; BP00207:Cell cycle control; hsa04110:Cell cycle; hsa04722:Neurotrophin signaling pathway; hsa05200:Pathways in cancer				6
chr9:133719185-133719585	ABL1	(+8554)	BP00203:Cell cycle; BP00207:Cell cycle control; hsa04110:Cell cycle; hsa04722:Neurotrophin signaling pathway; hsa05200:Pathways in cancer				6
chr9:133721900-133722300	ABL1	(+11269)	BP00203:Cell cycle; BP00207:Cell cycle control; hsa04110:Cell cycle; hsa04722:Neurotrophin signaling pathway; hsa05200:Pathways in cancer				6
chr10:54073183-54073583	DKK1	(-658)	hsa04310:Wnt signaling pathway				6
chr10:54073892-54074329	DKK1	(+70)	hsa04310:Wnt signaling pathway				6
chr10:54074542-54074942	DKK1	(+701)	hsa04310:Wnt signaling pathway				6
chr10:54074966-54075366	DKK1	(+1125)	hsa04310:Wnt signaling pathway				6
chr10:54077046-54077453	DKK1	(+3209)	hsa04310:Wnt signaling pathway				6
chr10:54077836-54078282	DKK1	(+4018)	hsa04310:Wnt signaling pathway				6
chr10:73508795-73509195	C10orf54	(+24342)					6
chr10:73530520-73530920	C10orf54	(+2617)					6
chr10:73532018-73532418	C10orf54	(+1119)					6
chr11:9595013-9595420	WEE1	(-11)	BP00203:Cell cycle; BP00207:Cell cycle control; hsa04110:Cell cycle				6
chr11:9612076-9612550	WEE1	(+17085)	BP00203:Cell cycle; BP00207:Cell cycle control; hsa04110:Cell cycle				6
chr11:65682593-65682993	DRAP1	(-3935)	BP00031:Nucleoside, nucleotide and nucleic acid metabolism				6
chr11:65683249-65683649	DRAP1	(-3279)	BP00031:Nucleoside, nucleotide and nucleic acid metabolism				6
chr11:67780500-67780900	ALDH3B1	(+2910)					6
chr11:119186330-119186730	MCAM	(+1310)					6
chr11:119187528-119187960	MCAM	(+96)					6
chr11:119189434-119189940	MCAM	(-1847)					6
chr11:122932085-122932485	HSPA8	(+616)	hsa04010:MAPK signaling pathway				6
chr11:122992962-122993362	HSPA8	(-60261)	hsa04010:MAPK signaling pathway				6
chr11:122993570-122993970	HSPA8	(-60869)	hsa04010:MAPK signaling pathway				6
chr11:123024840-123025240	HSPA8	(-92139)	hsa04010:MAPK signaling pathway				6
chr11:123044950-123045350	HSPA8	(-112249)	hsa04010:MAPK signaling pathway				6
chr11:123058682-123059082	HSPA8	(-125981)	hsa04010:MAPK signaling pathway				6
chr11:123063202-123063602	HSPA8	(-130501)	hsa04010:MAPK signaling pathway				6
chr11:123064552-123064952	HSPA8	(-131851)	hsa04010:MAPK signaling pathway				6
chr12:1642925-1643325	FBXL14	(+60206)					6
chr12:1672226-1672626	FBXL14	(+30905)					6
chr12:1685376-1685815	FBXL14	(+17735)					6
chr12:1740296-1740696	WNT5B	(+2084)	hsa04310:Wnt signaling pathway; hsa05200:Pathways in cancer				6
chr12:1744706-1745106	WNT5B	(+6494)	hsa04310:Wnt signaling pathway; hsa05200:Pathways in cancer				6
chr12:52444709-52445109	NR4A1	(-277)	BP00031:Nucleoside, nucleotide and nucleic acid metabolism; hsa04010:MAPK signaling pathway				6
chr12:56360308-56360811	CDK2	(+4)	BP00203:Cell cycle; BP00207:Cell cycle control; hsa04110:Cell cycle; hsa05200:Pathways in cancer				6
chr13:27826359-27826759	RPL21	(+867)	hsa03010:Ribosome				6
chr13:114186621-114187021	TFDP1	(-52235)	BP00031:Nucleoside, nucleotide and nucleic acid metabolism; BP00203:Cell cycle; hsa04110:Cell cycle				6
chr14:24779927-24780327	LTB4R	(-578)					6
chr14:24785443-24785843	LTB4R	(+4938)					6
chr14:24792131-24792531	LTB4R	(+11626)					6
chr14:24837827-24838317	NFATC4	(+1927)	BP00031:Nucleoside, nucleotide and nucleic acid metabolism; hsa04010:MAPK signaling pathway; hsa04310:Wnt signaling pathway; hsa04662:B cell receptor signaling pathway				6
chr14:24848417-24848817	NFATC4	(+12472)	BP00031:Nucleoside, nucleotide and nucleic acid metabolism; hsa04010:MAPK signaling pathway; hsa04310:Wnt signaling pathway; hsa04662:B cell receptor signaling pathway				6
chr14:50048797-50049197	RPS29	(+4097)	hsa03010:Ribosome				6
chr14:54863559-54864004	CDKN3	(+109)	BP00203:Cell cycle				6
chr15:40674999-40675789	C15orf23	(+472)					6
chr15:40683469-40683869	C15orf23	(+8747)					6
chr15:66999941-67000341	SMAD6	(+5467)	BP00031:Nucleoside, nucleotide and nucleic acid metabolism				6
chr15:67002081-67002481	SMAD6	(+7607)	BP00031:Nucleoside, nucleotide and nucleic acid metabolism				6
chr15:67003525-67003941	SMAD6	(+9059)	BP00031:Nucleoside, nucleotide and nucleic acid metabolism				6
chr15:67052431-67052831	SMAD6	(+57957)	BP00031:Nucleoside, nucleotide and nucleic acid metabolism				6
chr15:67055711-67056111	SMAD6	(+61237)	BP00031:Nucleoside, nucleotide and nucleic acid metabolism				6
chr15:67061221-67061621	SMAD6	(+66747)	BP00031:Nucleoside, nucleotide and nucleic acid metabolism				6
chr15:67063621-67064021	SMAD6	(+69147)	BP00031:Nucleoside, nucleotide and nucleic acid metabolism				6
chr15:67077190-67078005	SMAD6	(+82924)	BP00031:Nucleoside, nucleotide and nucleic acid metabolism				6
chr15:67078081-67078661	SMAD6	(+83697)	BP00031:Nucleoside, nucleotide and nucleic acid metabolism				6
chr15:67079331-67079931	SMAD6	(+84957)	BP00031:Nucleoside, nucleotide and nucleic acid metabolism				6
chr15:67228328-67228908	SMAD6	(+233944)	BP00031:Nucleoside, nucleotide and nucleic acid metabolism				6
chr16:17262970-17263370	XYLT1	(+301568)					6
chr16:17424835-17425235	XYLT1	(+139703)					6
chr16:17527366-17527766	XYLT1	(+37172)					6
chr16:17565325-17565725	XYLT1	(-787)					6
chr16:18812117-18812517	ARL6IP1	(+540)					6
chr16:85355476-85355950	KIAA0182	(-291211)	BP00031:Nucleoside, nucleotide and nucleic acid metabolism				6
chr16:85549370-85549770	KIAA0182	(-97354)	BP00031:Nucleoside, nucleotide and nucleic acid metabolism				6
chr16:85557040-85557440	KIAA0182	(-89684)	BP00031:Nucleoside, nucleotide and nucleic acid metabolism				6
chr16:85647690-85648090	KIAA0182	(+966)	BP00031:Nucleoside, nucleotide and nucleic acid metabolism				6
chr16:89571918-89572339	SPG7	(-2676)					6
chr16:89661606-89662006	CPNE7	(+19630)					6
chr16:89663546-89663946	CPNE7	(+21570)					6
chr17:37009257-37009657	RPL23	(+596)	hsa03010:Ribosome				6
chr17:38192210-38192610	MED24	(+18479)	BP00031:Nucleoside, nucleotide and nucleic acid metabolism				6
chr17:56173144-56173544	DYNLL2	(+12564)					6
chr17:73149325-73149725	HN1	(+1250)					6
chr17:73150702-73151102	HN1	(-127)					6
chr19:55911003-55911403	RPL28	(+13903)	hsa03010:Ribosome				6
chr21:16329311-16329711	NRIP1	(+107615)	BP00031:Nucleoside, nucleotide and nucleic acid metabolism				6
chr21:16330081-16330481	NRIP1	(+106845)	BP00031:Nucleoside, nucleotide and nucleic acid metabolism				6
chr21:16330631-16331281	NRIP1	(+106170)	BP00031:Nucleoside, nucleotide and nucleic acid metabolism				6
chrY:16634263-16634734	NLGN4Y	(-1127)					6
chr1:1746611-1747011	GNB1	(+75715)	BP00102:Signal transduction				8
chr1:3229382-3229782	ARHGEF16	(-141565)					8
chr1:3392697-3393097	ARHGEF16	(+21750)		MEGF6	(+135162)	BP00102:Signal transduction; BP00120:Cell adhesion-mediated signaling; BP00129:Endocytosis; BP00193:Developmental processes; BP00274:Cell communication; BP00275:Extracellular matrix protein-mediated signaling	8
chr1:3395427-3395827	ARHGEF16	(+24480)		MEGF6	(+132432)	BP00102:Signal transduction; BP00120:Cell adhesion-mediated signaling; BP00129:Endocytosis; BP00193:Developmental processes; BP00274:Cell communication; BP00275:Extracellular matrix protein-mediated signaling	8
chr1:3396227-3397347	ARHGEF16	(+25640)		MEGF6	(+131272)	BP00102:Signal transduction; BP00120:Cell adhesion-mediated signaling; BP00129:Endocytosis; BP00193:Developmental processes; BP00274:Cell communication; BP00275:Extracellular matrix protein-mediated signaling	8
chr1:3397697-3398877	ARHGEF16	(+27140)		MEGF6	(+129772)	BP00102:Signal transduction; BP00120:Cell adhesion-mediated signaling; BP00129:Endocytosis; BP00193:Developmental processes; BP00274:Cell communication; BP00275:Extracellular matrix protein-mediated signaling	8
chr1:3398987-3399387	ARHGEF16	(+28040)		MEGF6	(+128872)	BP00102:Signal transduction; BP00120:Cell adhesion-mediated signaling; BP00129:Endocytosis; BP00193:Developmental processes; BP00274:Cell communication; BP00275:Extracellular matrix protein-mediated signaling	8
chr1:3401687-3402087	ARHGEF16	(+30740)		MEGF6	(+126172)	BP00102:Signal transduction; BP00120:Cell adhesion-mediated signaling; BP00129:Endocytosis; BP00193:Developmental processes; BP00274:Cell communication; BP00275:Extracellular matrix protein-mediated signaling	8
chr1:3418360-3418858	ARHGEF16	(+47462)		MEGF6	(+109450)	BP00102:Signal transduction; BP00120:Cell adhesion-mediated signaling; BP00129:Endocytosis; BP00193:Developmental processes; BP00274:Cell communication; BP00275:Extracellular matrix protein-mediated signaling	8
chr1:3420728-3421230	ARHGEF16	(+49832)		MEGF6	(+107080)	BP00102:Signal transduction; BP00120:Cell adhesion-mediated signaling; BP00129:Endocytosis; BP00193:Developmental processes; BP00274:Cell communication; BP00275:Extracellular matrix protein-mediated signaling	8
chr1:3446747-3447267	ARHGEF16	(+75860)		MEGF6	(+81052)	BP00102:Signal transduction; BP00120:Cell adhesion-mediated signaling; BP00129:Endocytosis; BP00193:Developmental processes; BP00274:Cell communication; BP00275:Extracellular matrix protein-mediated signaling	8
chr1:3447758-3448177	ARHGEF16	(+76821)		MEGF6	(+80091)	BP00102:Signal transduction; BP00120:Cell adhesion-mediated signaling; BP00129:Endocytosis; BP00193:Developmental processes; BP00274:Cell communication; BP00275:Extracellular matrix protein-mediated signaling	8
chr1:3459667-3460067	MEGF6	(+68192)	BP00102:Signal transduction; BP00120:Cell adhesion-mediated signaling; BP00129:Endocytosis; BP00193:Developmental processes; BP00274:Cell communication; BP00275:Extracellular matrix protein-mediated signaling	ARHGEF16	(+88720)		8
chr1:3460617-3461017	MEGF6	(+67242)	BP00102:Signal transduction; BP00120:Cell adhesion-mediated signaling; BP00129:Endocytosis; BP00193:Developmental processes; BP00274:Cell communication; BP00275:Extracellular matrix protein-mediated signaling	ARHGEF16	(+89670)		8
chr1:3464567-3464967	MEGF6	(+63292)	BP00102:Signal transduction; BP00120:Cell adhesion-mediated signaling; BP00129:Endocytosis; BP00193:Developmental processes; BP00274:Cell communication; BP00275:Extracellular matrix protein-mediated signaling	ARHGEF16	(+93620)		8
chr1:6551524-6551924	PLEKHG5	(+5760)	BP00016:Amino acid transport; BP00102:Signal transduction; BP00124:Cell adhesion; BP00129:Endocytosis; BP00203:Cell cycle; BP00285:Cell structure and motility				8
chr1:7843397-7844171	PER3	(-930)	BP00102:Signal transduction; BP00274:Cell communication				8
chr1:7844321-7844721	PER3	(-193)	BP00102:Signal transduction; BP00274:Cell communication				8
chr1:17337169-17337569	ATP13A2	(+1054)	BP00291:Calcium ion homeostasis				8
chr1:17494668-17495068	PADI1	(-36753)	BP00063:Protein modification				8
chr1:17516336-17516856	PADI1	(-15025)	BP00063:Protein modification				8
chr1:17558755-17559155	PADI1	(+27334)	BP00063:Protein modification				8
chr1:17944685-17945143	ARHGEF10L	(+78584)					8
chr1:26608099-26608509	UBXN11	(+24891)					8
chr1:26608949-26609489	UBXN11	(+23976)					8
chr1:26611187-26611727	UBXN11	(+21738)					8
chr1:26612089-26612529	UBXN11	(+20886)					8
chr1:26633209-26633609	UBXN11	(-214)					8
chr1:32115992-32116392	COL16A1	(+53576)	BP00102:Signal transduction; BP00124:Cell adhesion; BP00274:Cell communication; BP00285:Cell structure and motility; BP00286:Cell structure				8
chr1:36558915-36559315	ADPRHL2	(+4662)	BP00063:Protein modification	COL8A2	(+6735)	BP00285:Cell structure and motility; BP00286:Cell structure	8
chr1:36559695-36560095	ADPRHL2	(+5442)	BP00063:Protein modification	COL8A2	(+5955)	BP00285:Cell structure and motility; BP00286:Cell structure	8
chr1:36599209-36599636	COL8A2	(-33573)	BP00285:Cell structure and motility; BP00286:Cell structure				8
chr1:36600709-36601109	COL8A2	(-35059)	BP00285:Cell structure and motility; BP00286:Cell structure				8
chr1:36803719-36804119	STK40	(+47566)	BP00063:Protein modification; BP00064:Protein phosphorylation				8
chr1:36816635-36817035	STK40	(+34650)	BP00063:Protein modification; BP00064:Protein phosphorylation				8
chr1:36817069-36817469	STK40	(+34216)	BP00063:Protein modification; BP00064:Protein phosphorylation				8
chr1:39670779-39671179	MACF1	(-125962)	BP00207:Cell cycle control				8
chr1:39864382-39864808	MACF1	(+67654)	BP00207:Cell cycle control				8
chr1:39875618-39876018	MACF1	(+78877)	BP00207:Cell cycle control				8
chr1:43996369-43996769	PTPRF	(+22)	BP00063:Protein modification; BP00064:Protein phosphorylation; BP00102:Signal transduction; BP00120:Cell adhesion-mediated signaling; BP00124:Cell adhesion; BP00193:Developmental processes; BP00274:Cell communication; BP00285:Cell structure and motility; hsa04514:Cell adhesion molecules (CAMs)				8
chr1:44441549-44441949	B4GALT2	(-3859)	BP00063:Protein modification				8
chr1:44445276-44445799	B4GALT2	(-70)	BP00063:Protein modification				8
chr1:53611998-53612414	SLC1A7	(-3917)	BP00016:Amino acid transport; BP00102:Signal transduction; BP00274:Cell communication				8
chr1:64128355-64128755	ROR1	(-111135)	BP00063:Protein modification; BP00064:Protein phosphorylation; BP00102:Signal transduction; BP00108:Receptor protein tyrosine kinase signaling pathway				8
chr1:64358382-64358782	ROR1	(+118892)	BP00063:Protein modification; BP00064:Protein phosphorylation; BP00102:Signal transduction; BP00108:Receptor protein tyrosine kinase signaling pathway				8
chr1:64394432-64394832	ROR1	(+154942)	BP00063:Protein modification; BP00064:Protein phosphorylation; BP00102:Signal transduction; BP00108:Receptor protein tyrosine kinase signaling pathway				8
chr1:89488261-89488681	GBP3	(+78)					8
chr1:112937478-112937878	CTTNBP2NL	(-1122)					8
chr1:113044593-113044993	CTTNBP2NL	(+105993)					8
chr1:115732435-115733205	NGF	(+148037)	BP00102:Signal transduction; BP00108:Receptor protein tyrosine kinase signaling pathway; BP00193:Developmental processes; BP00274:Cell communication				8
chr1:115733555-115733955	NGF	(+147102)	BP00102:Signal transduction; BP00108:Receptor protein tyrosine kinase signaling pathway; BP00193:Developmental processes; BP00274:Cell communication				8
chr1:115770496-115770896	NGF	(+110161)	BP00102:Signal transduction; BP00108:Receptor protein tyrosine kinase signaling pathway; BP00193:Developmental processes; BP00274:Cell communication				8
chr1:115782216-115782740	NGF	(+98379)	BP00102:Signal transduction; BP00108:Receptor protein tyrosine kinase signaling pathway; BP00193:Developmental processes; BP00274:Cell communication				8
chr1:115829161-115829561	NGF	(+51496)	BP00102:Signal transduction; BP00108:Receptor protein tyrosine kinase signaling pathway; BP00193:Developmental processes; BP00274:Cell communication				8
chr1:115875543-115875943	NGF	(+5114)	BP00102:Signal transduction; BP00108:Receptor protein tyrosine kinase signaling pathway; BP00193:Developmental processes; BP00274:Cell communication				8
chr1:115877613-115878013	NGF	(+3044)	BP00102:Signal transduction; BP00108:Receptor protein tyrosine kinase signaling pathway; BP00193:Developmental processes; BP00274:Cell communication				8
chr1:115880253-115881011	NGF	(+225)	BP00102:Signal transduction; BP00108:Receptor protein tyrosine kinase signaling pathway; BP00193:Developmental processes; BP00274:Cell communication				8
chr1:116039871-116040271	NGF	(-159214)	BP00102:Signal transduction; BP00108:Receptor protein tyrosine kinase signaling pathway; BP00193:Developmental processes; BP00274:Cell communication				8
chr1:150133860-150134260	PLEKHO1	(+11890)					8
chr1:150134530-150134930	PLEKHO1	(+12560)					8
chr1:150166909-150167309	PLEKHO1	(+44939)					8
chr1:150186260-150186660	PLEKHO1	(+64290)					8
chr1:151961124-151961524	S100A10	(+5390)	BP00193:Developmental processes				8
chr1:151961883-151962364	S100A10	(+4590)	BP00193:Developmental processes				8
chr1:152003131-152003531	S100A10	(-36617)	BP00193:Developmental processes				8
chr1:153575877-153576277	S100A16	(+9437)					8
chr1:154297276-154297749	ATP8B2	(-2763)					8
chr1:154298534-154299022	ATP8B2	(-1498)					8
chr1:154316272-154316672	ATP8B2	(+16196)					8
chr1:154322919-154323319	ATP8B2	(+22843)					8
chr1:154324669-154325069	ATP8B2	(+24593)					8
chr1:156094751-156095151	SEMA4A	(-28371)	BP00102:Signal transduction; BP00108:Receptor protein tyrosine kinase signaling pathway; BP00193:Developmental processes; hsa04360:Axon guidance	LMNA	(+10490)	BP00285:Cell structure and motility; BP00286:Cell structure; hsa05410:Hypertrophic cardiomyopathy (HCM); hsa05412:Arrhythmogenic right ventricular cardiomyopathy (ARVC); hsa05414:Dilated cardiomyopathy	8
chr1:156114911-156115311	SEMA4A	(-8211)	BP00102:Signal transduction; BP00108:Receptor protein tyrosine kinase signaling pathway; BP00193:Developmental processes; hsa04360:Axon guidance	LMNA	(+30650)	BP00285:Cell structure and motility; BP00286:Cell structure; hsa05410:Hypertrophic cardiomyopathy (HCM); hsa05412:Arrhythmogenic right ventricular cardiomyopathy (ARVC); hsa05414:Dilated cardiomyopathy	8
chr1:156115371-156115771	SEMA4A	(-7751)	BP00102:Signal transduction; BP00108:Receptor protein tyrosine kinase signaling pathway; BP00193:Developmental processes; hsa04360:Axon guidance	LMNA	(+31110)	BP00285:Cell structure and motility; BP00286:Cell structure; hsa05410:Hypertrophic cardiomyopathy (HCM); hsa05412:Arrhythmogenic right ventricular cardiomyopathy (ARVC); hsa05414:Dilated cardiomyopathy	8
chr1:156116267-156116867	SEMA4A	(-6755)	BP00102:Signal transduction; BP00108:Receptor protein tyrosine kinase signaling pathway; BP00193:Developmental processes; hsa04360:Axon guidance	LMNA	(+32106)	BP00285:Cell structure and motility; BP00286:Cell structure; hsa05410:Hypertrophic cardiomyopathy (HCM); hsa05412:Arrhythmogenic right ventricular cardiomyopathy (ARVC); hsa05414:Dilated cardiomyopathy	8
chr1:156117427-156117887	SEMA4A	(-5665)	BP00102:Signal transduction; BP00108:Receptor protein tyrosine kinase signaling pathway; BP00193:Developmental processes; hsa04360:Axon guidance	LMNA	(+33196)	BP00285:Cell structure and motility; BP00286:Cell structure; hsa05410:Hypertrophic cardiomyopathy (HCM); hsa05412:Arrhythmogenic right ventricular cardiomyopathy (ARVC); hsa05414:Dilated cardiomyopathy	8
chr1:156863088-156863804	PEAR1	(-77)	BP00129:Endocytosis; BP00193:Developmental processes				8
chr1:156864353-156864908	PEAR1	(+1108)	BP00129:Endocytosis; BP00193:Developmental processes				8
chr1:156866558-156866958	PEAR1	(+3235)	BP00129:Endocytosis; BP00193:Developmental processes				8
chr1:156868133-156868533	PEAR1	(+4810)	BP00129:Endocytosis; BP00193:Developmental processes				8
chr1:156870738-156871138	PEAR1	(+7415)	BP00129:Endocytosis; BP00193:Developmental processes				8
chr1:156890038-156890438	PEAR1	(+26715)	BP00129:Endocytosis; BP00193:Developmental processes				8
chr1:159885394-159885794	CCDC19	(-15688)		TAGLN2	(+9690)	BP00173:Muscle contraction	8
chr1:159893263-159893684	CCDC19	(-23568)		TAGLN2	(+1810)	BP00173:Muscle contraction	8
chr1:161695936-161696336	FCRLB	(+3693)	BP00102:Signal transduction				8
chr1:180171001-180171541	QSOX1	(+47303)	BP00063:Protein modification				8
chr1:180172715-180173115	QSOX1	(+48947)	BP00063:Protein modification				8
chr1:180173301-180173775	QSOX1	(+49570)	BP00063:Protein modification				8
chr1:180176605-180177005	QSOX1	(+52837)	BP00063:Protein modification				8
chr1:185259656-185260555	IVNS1ABP	(+26355)					8
chr1:185264086-185264486	IVNS1ABP	(+22175)					8
chr1:185615502-185615902	IVNS1ABP	(-329241)					8
chr1:198057756-198058256	NEK7	(-68102)	BP00063:Protein modification; BP00064:Protein phosphorylation				8
chr1:198086455-198086893	NEK7	(-39434)	BP00063:Protein modification; BP00064:Protein phosphorylation				8
chr1:198087083-198087903	NEK7	(-38615)	BP00063:Protein modification; BP00064:Protein phosphorylation				8
chr1:198089313-198089713	NEK7	(-36595)	BP00063:Protein modification; BP00064:Protein phosphorylation				8
chr1:198090153-198090753	NEK7	(-35655)	BP00063:Protein modification; BP00064:Protein phosphorylation				8
chr1:198092483-198092883	NEK7	(-33425)	BP00063:Protein modification; BP00064:Protein phosphorylation				8
chr1:198125157-198125716	NEK7	(-671)	BP00063:Protein modification; BP00064:Protein phosphorylation				8
chr1:198127037-198127517	NEK7	(+1169)	BP00063:Protein modification; BP00064:Protein phosphorylation				8
chr1:198127537-198127937	NEK7	(+1629)	BP00063:Protein modification; BP00064:Protein phosphorylation				8
chr1:198128837-198129237	NEK7	(+2929)	BP00063:Protein modification; BP00064:Protein phosphorylation				8
chr1:198148599-198148999	NEK7	(+22691)	BP00063:Protein modification; BP00064:Protein phosphorylation				8
chr1:198227787-198228187	NEK7	(+101879)	BP00063:Protein modification; BP00064:Protein phosphorylation				8
chr1:198237039-198237439	NEK7	(+111131)	BP00063:Protein modification; BP00064:Protein phosphorylation				8
chr1:198258507-198258907	NEK7	(+132599)	BP00063:Protein modification; BP00064:Protein phosphorylation				8
chr1:198294882-198295680	NEK7	(+169173)	BP00063:Protein modification; BP00064:Protein phosphorylation				8
chr1:198295982-198296382	NEK7	(+170074)	BP00063:Protein modification; BP00064:Protein phosphorylation				8
chr1:201235977-201236377	PKP1	(-16403)	BP00102:Signal transduction; BP00124:Cell adhesion; BP00274:Cell communication				8
chr1:201237181-201237581	PKP1	(-15199)	BP00102:Signal transduction; BP00124:Cell adhesion; BP00274:Cell communication				8
chr1:201237707-201238171	PKP1	(-14641)	BP00102:Signal transduction; BP00124:Cell adhesion; BP00274:Cell communication				8
chr1:201475259-201475659	CSRP1	(+508)	BP00193:Developmental processes				8
chr1:203524930-203525330	ATP2B4	(-70785)	BP00291:Calcium ion homeostasis; hsa04020:Calcium signaling pathway				8
chr1:203525360-203525760	ATP2B4	(-70355)	BP00291:Calcium ion homeostasis; hsa04020:Calcium signaling pathway				8
chr1:210009168-210009568	DIEXF	(+8056)					8
chr1:210056536-210056936	DIEXF	(+55424)					8
chr1:210057486-210057886	DIEXF	(+56374)					8
chr1:214505236-214505757	SMYD2	(+50932)		PTPN14	(+219527)	BP00063:Protein modification; BP00193:Developmental processes; BP00285:Cell structure and motility; BP00287:Cell motility	8
chr1:214506567-214506967	SMYD2	(+52202)		PTPN14	(+218257)	BP00063:Protein modification; BP00193:Developmental processes; BP00285:Cell structure and motility; BP00287:Cell motility	8
chr1:214601252-214601652	PTPN14	(+123572)	BP00063:Protein modification; BP00193:Developmental processes; BP00285:Cell structure and motility; BP00287:Cell motility	SMYD2	(+146887)		8
chr1:214618432-214618832	PTPN14	(+106392)	BP00063:Protein modification; BP00193:Developmental processes; BP00285:Cell structure and motility; BP00287:Cell motility	SMYD2	(+164067)		8
chr1:214620382-214620857	PTPN14	(+104404)	BP00063:Protein modification; BP00193:Developmental processes; BP00285:Cell structure and motility; BP00287:Cell motility	SMYD2	(+166055)		8
chr1:223887981-223888381	CAPN2	(-11938)	BP00102:Signal transduction; hsa04510:Focal adhesion				8
chr1:223890321-223890721	CAPN2	(-9598)	BP00102:Signal transduction; hsa04510:Focal adhesion				8
chr1:223895021-223895421	CAPN2	(-4898)	BP00102:Signal transduction; hsa04510:Focal adhesion				8
chr1:223895521-223895921	CAPN2	(-4398)	BP00102:Signal transduction; hsa04510:Focal adhesion				8
chr1:223900701-223901101	CAPN2	(+782)	BP00102:Signal transduction; hsa04510:Focal adhesion				8
chr1:223901331-223901731	CAPN2	(+1412)	BP00102:Signal transduction; hsa04510:Focal adhesion				8
chr1:223965601-223966001	CAPN2	(+65682)	BP00102:Signal transduction; hsa04510:Focal adhesion				8
chr1:223966987-223967387	CAPN2	(+67068)	BP00102:Signal transduction; hsa04510:Focal adhesion				8
chr1:223968071-223968471	CAPN2	(+68152)	BP00102:Signal transduction; hsa04510:Focal adhesion				8
chr1:223968611-223969011	CAPN2	(+68692)	BP00102:Signal transduction; hsa04510:Focal adhesion				8
chr1:243661266-243661666	AKT3	(+345118)	BP00063:Protein modification; BP00064:Protein phosphorylation; BP00193:Developmental processes; BP00207:Cell cycle control; BP00224:Cell proliferation and differentiation; hsa04510:Focal adhesion; hsa04530:Tight junction; hsa04666:Fc gamma R-mediated phagocytosis; hsa05200:Pathways in cancer; hsa05214:Glioma				8
chr1:243962147-243962568	AKT3	(+44226)	BP00063:Protein modification; BP00064:Protein phosphorylation; BP00193:Developmental processes; BP00207:Cell cycle control; BP00224:Cell proliferation and differentiation; hsa04510:Focal adhesion; hsa04530:Tight junction; hsa04666:Fc gamma R-mediated phagocytosis; hsa05200:Pathways in cancer; hsa05214:Glioma				8
chr1:244012723-244013123	AKT3	(-6339)	BP00063:Protein modification; BP00064:Protein phosphorylation; BP00193:Developmental processes; BP00207:Cell cycle control; BP00224:Cell proliferation and differentiation; hsa04510:Focal adhesion; hsa04530:Tight junction; hsa04666:Fc gamma R-mediated phagocytosis; hsa05200:Pathways in cancer; hsa05214:Glioma				8
chr1:244014191-244014591	AKT3	(-7807)	BP00063:Protein modification; BP00064:Protein phosphorylation; BP00193:Developmental processes; BP00207:Cell cycle control; BP00224:Cell proliferation and differentiation; hsa04510:Focal adhesion; hsa04530:Tight junction; hsa04666:Fc gamma R-mediated phagocytosis; hsa05200:Pathways in cancer; hsa05214:Glioma				8
chr2:9252074-9252474	ASAP2	(-94620)	BP00102:Signal transduction; BP00124:Cell adhesion; BP00285:Cell structure and motility; hsa04666:Fc gamma R-mediated phagocytosis				8
chr2:9353608-9354088	ASAP2	(+6954)	BP00102:Signal transduction; BP00124:Cell adhesion; BP00285:Cell structure and motility; hsa04666:Fc gamma R-mediated phagocytosis	ITGB1BP1	(+209795)		8
chr2:9374978-9375378	ASAP2	(+28284)	BP00102:Signal transduction; BP00124:Cell adhesion; BP00285:Cell structure and motility; hsa04666:Fc gamma R-mediated phagocytosis	ITGB1BP1	(+188465)		8
chr2:9389158-9390048	ASAP2	(+42709)	BP00102:Signal transduction; BP00124:Cell adhesion; BP00285:Cell structure and motility; hsa04666:Fc gamma R-mediated phagocytosis	ITGB1BP1	(+174040)		8
chr2:9423818-9424218	ASAP2	(+77124)	BP00102:Signal transduction; BP00124:Cell adhesion; BP00285:Cell structure and motility; hsa04666:Fc gamma R-mediated phagocytosis	ITGB1BP1	(+139625)		8
chr2:9428398-9428938	ASAP2	(+81774)	BP00102:Signal transduction; BP00124:Cell adhesion; BP00285:Cell structure and motility; hsa04666:Fc gamma R-mediated phagocytosis	ITGB1BP1	(+134975)		8
chr2:9450578-9450978	ASAP2	(+103884)	BP00102:Signal transduction; BP00124:Cell adhesion; BP00285:Cell structure and motility; hsa04666:Fc gamma R-mediated phagocytosis	ITGB1BP1	(+112865)		8
chr2:9451008-9451408	ASAP2	(+104314)	BP00102:Signal transduction; BP00124:Cell adhesion; BP00285:Cell structure and motility; hsa04666:Fc gamma R-mediated phagocytosis	ITGB1BP1	(+112435)		8
chr2:9451558-9452088	ASAP2	(+104929)	BP00102:Signal transduction; BP00124:Cell adhesion; BP00285:Cell structure and motility; hsa04666:Fc gamma R-mediated phagocytosis	ITGB1BP1	(+111820)		8
chr2:9530508-9530908	ITGB1BP1	(+32935)		ASAP2	(+183814)	BP00102:Signal transduction; BP00124:Cell adhesion; BP00285:Cell structure and motility; hsa04666:Fc gamma R-mediated phagocytosis	8
chr2:9547518-9547918	ITGB1BP1	(+15925)		ASAP2	(+200824)	BP00102:Signal transduction; BP00124:Cell adhesion; BP00285:Cell structure and motility; hsa04666:Fc gamma R-mediated phagocytosis	8
chr2:46967145-46967545	SOCS5	(+41246)	BP00102:Signal transduction; BP00108:Receptor protein tyrosine kinase signaling pathway; BP00274:Cell communication				8
chr2:46993322-46993722	SOCS5	(+67423)	BP00102:Signal transduction; BP00108:Receptor protein tyrosine kinase signaling pathway; BP00274:Cell communication				8
chr2:46994512-46995302	SOCS5	(+68808)	BP00102:Signal transduction; BP00108:Receptor protein tyrosine kinase signaling pathway; BP00274:Cell communication				8
chr2:46995672-46996072	SOCS5	(+69773)	BP00102:Signal transduction; BP00108:Receptor protein tyrosine kinase signaling pathway; BP00274:Cell communication				8
chr2:47000972-47001372	SOCS5	(+75073)	BP00102:Signal transduction; BP00108:Receptor protein tyrosine kinase signaling pathway; BP00274:Cell communication				8
chr2:47006731-47007131	SOCS5	(+80832)	BP00102:Signal transduction; BP00108:Receptor protein tyrosine kinase signaling pathway; BP00274:Cell communication				8
chr2:47027107-47027547	SOCS5	(+101228)	BP00102:Signal transduction; BP00108:Receptor protein tyrosine kinase signaling pathway; BP00274:Cell communication				8
chr2:47030756-47031536	SOCS5	(+105047)	BP00102:Signal transduction; BP00108:Receptor protein tyrosine kinase signaling pathway; BP00274:Cell communication				8
chr2:47033766-47034166	SOCS5	(+107867)	BP00102:Signal transduction; BP00108:Receptor protein tyrosine kinase signaling pathway; BP00274:Cell communication				8
chr2:47039436-47039946	SOCS5	(+113592)	BP00102:Signal transduction; BP00108:Receptor protein tyrosine kinase signaling pathway; BP00274:Cell communication				8
chr2:47054850-47055250	SOCS5	(+128951)	BP00102:Signal transduction; BP00108:Receptor protein tyrosine kinase signaling pathway; BP00274:Cell communication				8
chr2:47075013-47075413	SOCS5	(+149114)	BP00102:Signal transduction; BP00108:Receptor protein tyrosine kinase signaling pathway; BP00274:Cell communication				8
chr2:47077790-47078190	SOCS5	(+151891)	BP00102:Signal transduction; BP00108:Receptor protein tyrosine kinase signaling pathway; BP00274:Cell communication				8
chr2:47085330-47086377	SOCS5	(+159755)	BP00102:Signal transduction; BP00108:Receptor protein tyrosine kinase signaling pathway; BP00274:Cell communication				8
chr2:47108712-47109112	SOCS5	(+182813)	BP00102:Signal transduction; BP00108:Receptor protein tyrosine kinase signaling pathway; BP00274:Cell communication				8
chr2:47109818-47110362	SOCS5	(+183991)	BP00102:Signal transduction; BP00108:Receptor protein tyrosine kinase signaling pathway; BP00274:Cell communication				8
chr2:47112500-47113022	SOCS5	(+186662)	BP00102:Signal transduction; BP00108:Receptor protein tyrosine kinase signaling pathway; BP00274:Cell communication				8
chr2:47212210-47212709	TTC7A	(+44147)	BP00063:Protein modification; BP00102:Signal transduction; BP00274:Cell communication	CALM2	(+191280)	BP00102:Signal transduction; BP00111:Intracellular signaling cascade; BP00112:Calcium mediated signaling; BP00224:Cell proliferation and differentiation; hsa04020:Calcium signaling pathway; hsa04070:Phosphatidylinositol signaling system; hsa04916:Melanogenesis; hsa05214:Glioma	8
chr2:47212721-47213121	TTC7A	(+44608)	BP00063:Protein modification; BP00102:Signal transduction; BP00274:Cell communication	CALM2	(+190819)	BP00102:Signal transduction; BP00111:Intracellular signaling cascade; BP00112:Calcium mediated signaling; BP00224:Cell proliferation and differentiation; hsa04020:Calcium signaling pathway; hsa04070:Phosphatidylinositol signaling system; hsa04916:Melanogenesis; hsa05214:Glioma	8
chr2:47213590-47214081	TTC7A	(+45523)	BP00063:Protein modification; BP00102:Signal transduction; BP00274:Cell communication	CALM2	(+189904)	BP00102:Signal transduction; BP00111:Intracellular signaling cascade; BP00112:Calcium mediated signaling; BP00224:Cell proliferation and differentiation; hsa04020:Calcium signaling pathway; hsa04070:Phosphatidylinositol signaling system; hsa04916:Melanogenesis; hsa05214:Glioma	8
chr2:47260990-47261556	TTC7A	(+92960)	BP00063:Protein modification; BP00102:Signal transduction; BP00274:Cell communication	CALM2	(+142467)	BP00102:Signal transduction; BP00111:Intracellular signaling cascade; BP00112:Calcium mediated signaling; BP00224:Cell proliferation and differentiation; hsa04020:Calcium signaling pathway; hsa04070:Phosphatidylinositol signaling system; hsa04916:Melanogenesis; hsa05214:Glioma	8
chr2:47271990-47272390	TTC7A	(+103877)	BP00063:Protein modification; BP00102:Signal transduction; BP00274:Cell communication	CALM2	(+131550)	BP00102:Signal transduction; BP00111:Intracellular signaling cascade; BP00112:Calcium mediated signaling; BP00224:Cell proliferation and differentiation; hsa04020:Calcium signaling pathway; hsa04070:Phosphatidylinositol signaling system; hsa04916:Melanogenesis; hsa05214:Glioma	8
chr2:47321956-47322356	CALM2	(+81584)	BP00102:Signal transduction; BP00111:Intracellular signaling cascade; BP00112:Calcium mediated signaling; BP00224:Cell proliferation and differentiation; hsa04020:Calcium signaling pathway; hsa04070:Phosphatidylinositol signaling system; hsa04916:Melanogenesis; hsa05214:Glioma	TTC7A	(+153843)	BP00063:Protein modification; BP00102:Signal transduction; BP00274:Cell communication	8
chr2:54502472-54502872	SPTBN1	(-180782)	BP00285:Cell structure and motility; BP00286:Cell structure				8
chr2:73316523-73316961	RAB11FIP5	(-9595)		RAB11FIP5	(+23404)		8
chr2:73338623-73339023	RAB11FIP5	(-31676)		RAB11FIP5	(+1323)		8
chr2:73404348-73404748	RAB11FIP5	(-64402)					8
chr2:74782064-74782558	LOXL3	(-1249)	BP00124:Cell adhesion; BP00264:Tumor suppressor	DOK1	(+799)	BP00102:Signal transduction; BP00285:Cell structure and motility; BP00287:Cell motility	8
chr2:74785698-74786398	LOXL3	(-4986)	BP00124:Cell adhesion; BP00264:Tumor suppressor	DOK1	(+4536)	BP00102:Signal transduction; BP00285:Cell structure and motility; BP00287:Cell motility	8
chr2:74786939-74787488	DOK1	(+5702)	BP00102:Signal transduction; BP00285:Cell structure and motility; BP00287:Cell motility	C2orf65	(+87950)		8
chr2:74787498-74788004	DOK1	(+6239)	BP00102:Signal transduction; BP00285:Cell structure and motility; BP00287:Cell motility	C2orf65	(+87413)		8
chr2:74795771-74796210	DOK1	(+14479)	BP00102:Signal transduction; BP00285:Cell structure and motility; BP00287:Cell motility	C2orf65	(+79173)		8
chr2:74804676-74805091	DOK1	(+23372)	BP00102:Signal transduction; BP00285:Cell structure and motility; BP00287:Cell motility	C2orf65	(+70280)		8
chr2:74810521-74811146	DOK1	(+29322)	BP00102:Signal transduction; BP00285:Cell structure and motility; BP00287:Cell motility	C2orf65	(+64330)		8
chr2:110859230-110859630	MALL	(+14713)					8
chr2:110873259-110873659	MALL	(+684)					8
chr2:110873879-110874279	MALL	(+64)					8
chr2:113402594-113403005	SLC20A1	(-634)					8
chr2:113403915-113404315	SLC20A1	(+681)					8
chr2:113404445-113404845	SLC20A1	(+1211)					8
chr2:113416435-113416835	SLC20A1	(+13201)					8
chr2:113422285-113422685	SLC20A1	(+19051)					8
chr2:113422773-113423260	SLC20A1	(+19583)					8
chr2:113423925-113424325	SLC20A1	(+20691)					8
chr2:121516531-121517051	GLI2	(-38076)	BP00193:Developmental processes; BP00242:Embryogenesis; hsa05200:Pathways in cancer				8
chr2:121621296-121621696	GLI2	(+66629)	BP00193:Developmental processes; BP00242:Embryogenesis; hsa05200:Pathways in cancer				8
chr2:121695180-121695580	GLI2	(+140513)	BP00193:Developmental processes; BP00242:Embryogenesis; hsa05200:Pathways in cancer				8
chr2:121734051-121734451	GLI2	(+179384)	BP00193:Developmental processes; BP00242:Embryogenesis; hsa05200:Pathways in cancer				8
chr2:128390211-128390611	GPR17	(-13028)	BP00102:Signal transduction	MYO7B	(+97033)		8
chr2:128391308-128391728	GPR17	(-11921)	BP00102:Signal transduction	MYO7B	(+98140)		8
chr2:128395292-128395692	GPR17	(-7947)	BP00102:Signal transduction	MYO7B	(+102114)		8
chr2:151352702-151353102	RND3	(-8693)	BP00102:Signal transduction; BP00285:Cell structure and motility				8
chr2:151383487-151383887	RND3	(-39478)	BP00102:Signal transduction; BP00285:Cell structure and motility				8
chr2:151386067-151386467	RND3	(-42058)	BP00102:Signal transduction; BP00285:Cell structure and motility				8
chr2:163023486-163023886	FAP	(+76359)	BP00102:Signal transduction				8
chr2:163024576-163024976	FAP	(+75269)	BP00102:Signal transduction				8
chr2:163025136-163025536	FAP	(+74709)	BP00102:Signal transduction				8
chr2:163026026-163026426	FAP	(+73819)	BP00102:Signal transduction				8
chr2:163048656-163049056	FAP	(+51189)	BP00102:Signal transduction				8
chr2:163077146-163077546	FAP	(+22699)	BP00102:Signal transduction				8
chr2:163077606-163078006	FAP	(+22239)	BP00102:Signal transduction				8
chr2:163083956-163084356	FAP	(+15889)	BP00102:Signal transduction				8
chr2:163089226-163089626	FAP	(+10619)	BP00102:Signal transduction				8
chr2:163089726-163090126	FAP	(+10119)	BP00102:Signal transduction				8
chr2:163092232-163092632	FAP	(+7613)	BP00102:Signal transduction				8
chr2:163097326-163097726	FAP	(+2519)	BP00102:Signal transduction				8
chr2:163098572-163098972	FAP	(+1273)	BP00102:Signal transduction				8
chr2:163099142-163100122	FAP	(+413)	BP00102:Signal transduction				8
chr2:163100932-163101376	FAP	(-1109)	BP00102:Signal transduction				8
chr2:163118042-163118457	FAP	(-18205)	BP00102:Signal transduction				8
chr2:191514751-191515151	GLS	(-230596)					8
chr2:191656292-191656692	GLS	(-89055)					8
chr2:191723471-191723878	GLS	(-21872)					8
chr2:191723921-191724548	GLS	(-21312)					8
chr2:191724908-191725308	GLS	(-20439)					8
chr2:191746161-191746840	GLS	(+954)					8
chr2:191806459-191806859	GLS	(+61112)					8
chr2:217970245-217970645	TNS1	(+838351)	BP00063:Protein modification; BP00064:Protein phosphorylation; BP00102:Signal transduction; BP00124:Cell adhesion; BP00207:Cell cycle control; BP00224:Cell proliferation and differentiation; BP00264:Tumor suppressor				8
chr2:218660371-218660884	TNS1	(+148168)	BP00063:Protein modification; BP00064:Protein phosphorylation; BP00102:Signal transduction; BP00124:Cell adhesion; BP00207:Cell cycle control; BP00224:Cell proliferation and differentiation; BP00264:Tumor suppressor				8
chr2:218660914-218661314	TNS1	(+147682)	BP00063:Protein modification; BP00064:Protein phosphorylation; BP00102:Signal transduction; BP00124:Cell adhesion; BP00207:Cell cycle control; BP00224:Cell proliferation and differentiation; BP00264:Tumor suppressor				8
chr2:218661914-218662314	TNS1	(+146682)	BP00063:Protein modification; BP00064:Protein phosphorylation; BP00102:Signal transduction; BP00124:Cell adhesion; BP00207:Cell cycle control; BP00224:Cell proliferation and differentiation; BP00264:Tumor suppressor				8
chr2:218776676-218777076	TNS1	(+31920)	BP00063:Protein modification; BP00064:Protein phosphorylation; BP00102:Signal transduction; BP00124:Cell adhesion; BP00207:Cell cycle control; BP00224:Cell proliferation and differentiation; BP00264:Tumor suppressor				8
chr2:218799721-218800121	TNS1	(+8875)	BP00063:Protein modification; BP00064:Protein phosphorylation; BP00102:Signal transduction; BP00124:Cell adhesion; BP00207:Cell cycle control; BP00224:Cell proliferation and differentiation; BP00264:Tumor suppressor				8
chr2:218874801-218875201	TNS1	(-66205)	BP00063:Protein modification; BP00064:Protein phosphorylation; BP00102:Signal transduction; BP00124:Cell adhesion; BP00207:Cell cycle control; BP00224:Cell proliferation and differentiation; BP00264:Tumor suppressor				8
chr2:224834818-224836028	MRPL44	(+13302)					8
chr2:224836088-224837208	MRPL44	(+14527)					8
chr2:224837658-224838058	MRPL44	(+15737)					8
chr2:225667303-225667703	DOCK10	(+239827)	BP00102:Signal transduction; BP00111:Intracellular signaling cascade; BP00119:Other intracellular signaling cascade; BP00129:Endocytosis; BP00285:Cell structure and motility; BP00287:Cell motility				8
chr2:225795968-225796368	DOCK10	(+111162)	BP00102:Signal transduction; BP00111:Intracellular signaling cascade; BP00119:Other intracellular signaling cascade; BP00129:Endocytosis; BP00285:Cell structure and motility; BP00287:Cell motility				8
chr2:225891858-225892258	DOCK10	(+15272)	BP00102:Signal transduction; BP00111:Intracellular signaling cascade; BP00119:Other intracellular signaling cascade; BP00129:Endocytosis; BP00285:Cell structure and motility; BP00287:Cell motility				8
chr2:225899777-225900177	DOCK10	(+7353)	BP00102:Signal transduction; BP00111:Intracellular signaling cascade; BP00119:Other intracellular signaling cascade; BP00129:Endocytosis; BP00285:Cell structure and motility; BP00287:Cell motility				8
chr2:225905807-225906499	DOCK10	(+1177)	BP00102:Signal transduction; BP00111:Intracellular signaling cascade; BP00119:Other intracellular signaling cascade; BP00129:Endocytosis; BP00285:Cell structure and motility; BP00287:Cell motility				8
chr2:225964758-225965914	DOCK10	(-58006)	BP00102:Signal transduction; BP00111:Intracellular signaling cascade; BP00119:Other intracellular signaling cascade; BP00129:Endocytosis; BP00285:Cell structure and motility; BP00287:Cell motility				8
chr2:225968318-225968718	DOCK10	(-61188)	BP00102:Signal transduction; BP00111:Intracellular signaling cascade; BP00119:Other intracellular signaling cascade; BP00129:Endocytosis; BP00285:Cell structure and motility; BP00287:Cell motility				8
chr2:232026391-232026791	ARMC9	(-36751)					8
chr2:232125323-232125723	ARMC9	(+62181)					8
chr2:232191513-232191913	ARMC9	(+128371)					8
chr2:232244453-232244853	ARMC9	(+181311)					8
chr2:238341059-238341997	MLPH	(-54350)					8
chr2:238343545-238343945	MLPH	(-52133)					8
chr2:238384503-238384903	MLPH	(-11175)					8
chr2:239197375-239197775	PER2	(-368)	BP00102:Signal transduction; BP00274:Cell communication				8
chr3:11138234-11138634	HRH1	(-57780)	BP00102:Signal transduction; hsa04020:Calcium signaling pathway				8
chr3:11196929-11197329	HRH1	(+915)	BP00102:Signal transduction; hsa04020:Calcium signaling pathway				8
chr3:11237614-11238014	HRH1	(+41600)	BP00102:Signal transduction; hsa04020:Calcium signaling pathway				8
chr3:39188563-39188984	CSRNP1	(+6328)		TTC21A	(+39622)		8
chr3:39192385-39193014	CSRNP1	(+2402)		TTC21A	(+43548)		8
chr3:39193804-39194204	CSRNP1	(+1098)		TTC21A	(+44852)		8
chr3:42132766-42133166	TRAK1	(+220)	BP00193:Developmental processes				8
chr3:45685722-45686122	LIMD1	(+49599)					8
chr3:45686408-45686808	LIMD1	(+50285)					8
chr3:45688448-45688848	LIMD1	(+52325)					8
chr3:50274298-50274865	GNAI2	(+935)	BP00102:Signal transduction; hsa04360:Axon guidance; hsa04530:Tight junction; hsa04670:Leukocyte transendothelial migration; hsa04916:Melanogenesis				8
chr3:50283998-50284437	GNAI2	(+10571)	BP00102:Signal transduction; hsa04360:Axon guidance; hsa04530:Tight junction; hsa04670:Leukocyte transendothelial migration; hsa04916:Melanogenesis				8
chr3:52080690-52081090	DUSP7	(+9571)	BP00063:Protein modification; BP00064:Protein phosphorylation; BP00102:Signal transduction; BP00111:Intracellular signaling cascade; BP00224:Cell proliferation and differentiation				8
chr3:70878265-70878665	FOXP1	(+415851)	BP00102:Signal transduction; BP00193:Developmental processes; BP00207:Cell cycle control; BP00224:Cell proliferation and differentiation; BP00242:Embryogenesis; BP00274:Cell communication; BP00285:Cell structure and motility; BP00286:Cell structure				8
chr3:70999053-70999453	FOXP1	(+295063)	BP00102:Signal transduction; BP00193:Developmental processes; BP00207:Cell cycle control; BP00224:Cell proliferation and differentiation; BP00242:Embryogenesis; BP00274:Cell communication; BP00285:Cell structure and motility; BP00286:Cell structure				8
chr3:71071847-71072347	FOXP1	(+222219)	BP00102:Signal transduction; BP00193:Developmental processes; BP00207:Cell cycle control; BP00224:Cell proliferation and differentiation; BP00242:Embryogenesis; BP00274:Cell communication; BP00285:Cell structure and motility; BP00286:Cell structure				8
chr3:71105947-71106347	FOXP1	(+188169)	BP00102:Signal transduction; BP00193:Developmental processes; BP00207:Cell cycle control; BP00224:Cell proliferation and differentiation; BP00242:Embryogenesis; BP00274:Cell communication; BP00285:Cell structure and motility; BP00286:Cell structure				8
chr3:71112835-71113387	FOXP1	(+181205)	BP00102:Signal transduction; BP00193:Developmental processes; BP00207:Cell cycle control; BP00224:Cell proliferation and differentiation; BP00242:Embryogenesis; BP00274:Cell communication; BP00285:Cell structure and motility; BP00286:Cell structure				8
chr3:71150227-71150627	FOXP1	(+143889)	BP00102:Signal transduction; BP00193:Developmental processes; BP00207:Cell cycle control; BP00224:Cell proliferation and differentiation; BP00242:Embryogenesis; BP00274:Cell communication; BP00285:Cell structure and motility; BP00286:Cell structure				8
chr3:71151093-71151493	FOXP1	(+143023)	BP00102:Signal transduction; BP00193:Developmental processes; BP00207:Cell cycle control; BP00224:Cell proliferation and differentiation; BP00242:Embryogenesis; BP00274:Cell communication; BP00285:Cell structure and motility; BP00286:Cell structure				8
chr3:71560113-71560513	FOXP1	(-265997)	BP00102:Signal transduction; BP00193:Developmental processes; BP00207:Cell cycle control; BP00224:Cell proliferation and differentiation; BP00242:Embryogenesis; BP00274:Cell communication; BP00285:Cell structure and motility; BP00286:Cell structure				8
chr3:71585413-71585813	FOXP1	(-291297)	BP00102:Signal transduction; BP00193:Developmental processes; BP00207:Cell cycle control; BP00224:Cell proliferation and differentiation; BP00242:Embryogenesis; BP00274:Cell communication; BP00285:Cell structure and motility; BP00286:Cell structure				8
chr3:71586099-71586853	FOXP1	(-292160)	BP00102:Signal transduction; BP00193:Developmental processes; BP00207:Cell cycle control; BP00224:Cell proliferation and differentiation; BP00242:Embryogenesis; BP00274:Cell communication; BP00285:Cell structure and motility; BP00286:Cell structure				8
chr3:71590960-71591360	FOXP1	(-296844)	BP00102:Signal transduction; BP00193:Developmental processes; BP00207:Cell cycle control; BP00224:Cell proliferation and differentiation; BP00242:Embryogenesis; BP00274:Cell communication; BP00285:Cell structure and motility; BP00286:Cell structure				8
chr3:71591587-71592150	FOXP1	(-297553)	BP00102:Signal transduction; BP00193:Developmental processes; BP00207:Cell cycle control; BP00224:Cell proliferation and differentiation; BP00242:Embryogenesis; BP00274:Cell communication; BP00285:Cell structure and motility; BP00286:Cell structure				8
chr3:71600423-71600823	FOXP1	(-306307)	BP00102:Signal transduction; BP00193:Developmental processes; BP00207:Cell cycle control; BP00224:Cell proliferation and differentiation; BP00242:Embryogenesis; BP00274:Cell communication; BP00285:Cell structure and motility; BP00286:Cell structure				8
chr3:71629923-71630323	FOXP1	(-335807)	BP00102:Signal transduction; BP00193:Developmental processes; BP00207:Cell cycle control; BP00224:Cell proliferation and differentiation; BP00242:Embryogenesis; BP00274:Cell communication; BP00285:Cell structure and motility; BP00286:Cell structure				8
chr3:71636950-71637350	FOXP1	(-342834)	BP00102:Signal transduction; BP00193:Developmental processes; BP00207:Cell cycle control; BP00224:Cell proliferation and differentiation; BP00242:Embryogenesis; BP00274:Cell communication; BP00285:Cell structure and motility; BP00286:Cell structure				8
chr3:71637640-71638040	FOXP1	(-343524)	BP00102:Signal transduction; BP00193:Developmental processes; BP00207:Cell cycle control; BP00224:Cell proliferation and differentiation; BP00242:Embryogenesis; BP00274:Cell communication; BP00285:Cell structure and motility; BP00286:Cell structure				8
chr3:71638160-71639220	FOXP1	(-344374)	BP00102:Signal transduction; BP00193:Developmental processes; BP00207:Cell cycle control; BP00224:Cell proliferation and differentiation; BP00242:Embryogenesis; BP00274:Cell communication; BP00285:Cell structure and motility; BP00286:Cell structure				8
chr3:71639330-71639730	FOXP1	(-345214)	BP00102:Signal transduction; BP00193:Developmental processes; BP00207:Cell cycle control; BP00224:Cell proliferation and differentiation; BP00242:Embryogenesis; BP00274:Cell communication; BP00285:Cell structure and motility; BP00286:Cell structure				8
chr3:98509309-98509709	ST3GAL6	(+57937)	BP00063:Protein modification	DCBLD2	(+111024)		8
chr3:98510299-98510699	ST3GAL6	(+58927)	BP00063:Protein modification	DCBLD2	(+110034)		8
chr3:98511529-98511929	ST3GAL6	(+60157)	BP00063:Protein modification	DCBLD2	(+108804)		8
chr3:98587412-98587812	DCBLD2	(+32921)		ST3GAL6	(+136040)	BP00063:Protein modification	8
chr3:98614542-98614942	DCBLD2	(+5791)		ST3GAL6	(+163170)	BP00063:Protein modification	8
chr3:98619772-98620191	DCBLD2	(+551)					8
chr3:105176472-105176872	CBLB	(+411215)	BP00102:Signal transduction; BP00108:Receptor protein tyrosine kinase signaling pathway; hsa05200:Pathways in cancer				8
chr3:105438096-105438496	CBLB	(+149591)	BP00102:Signal transduction; BP00108:Receptor protein tyrosine kinase signaling pathway; hsa05200:Pathways in cancer				8
chr3:105583346-105583746	CBLB	(+4341)	BP00102:Signal transduction; BP00108:Receptor protein tyrosine kinase signaling pathway; hsa05200:Pathways in cancer				8
chr3:106329265-106329665	CBLB	(-741578)	BP00102:Signal transduction; BP00108:Receptor protein tyrosine kinase signaling pathway; hsa05200:Pathways in cancer				8
chr3:106335795-106336315	CBLB	(-748168)	BP00102:Signal transduction; BP00108:Receptor protein tyrosine kinase signaling pathway; hsa05200:Pathways in cancer				8
chr3:106347285-106347685	CBLB	(-759598)	BP00102:Signal transduction; BP00108:Receptor protein tyrosine kinase signaling pathway; hsa05200:Pathways in cancer				8
chr3:106353505-106353905	CBLB	(-765818)	BP00102:Signal transduction; BP00108:Receptor protein tyrosine kinase signaling pathway; hsa05200:Pathways in cancer				8
chr3:106354285-106354685	CBLB	(-766598)	BP00102:Signal transduction; BP00108:Receptor protein tyrosine kinase signaling pathway; hsa05200:Pathways in cancer				8
chr3:106430523-106430923	CBLB	(-842836)	BP00102:Signal transduction; BP00108:Receptor protein tyrosine kinase signaling pathway; hsa05200:Pathways in cancer				8
chr3:106448019-106448739	CBLB	(-860492)	BP00102:Signal transduction; BP00108:Receptor protein tyrosine kinase signaling pathway; hsa05200:Pathways in cancer				8
chr3:106464079-106464479	CBLB	(-876392)	BP00102:Signal transduction; BP00108:Receptor protein tyrosine kinase signaling pathway; hsa05200:Pathways in cancer				8
chr3:106484257-106484951	CBLB	(-896717)	BP00102:Signal transduction; BP00108:Receptor protein tyrosine kinase signaling pathway; hsa05200:Pathways in cancer				8
chr3:106556481-106556881	CBLB	(-968794)	BP00102:Signal transduction; BP00108:Receptor protein tyrosine kinase signaling pathway; hsa05200:Pathways in cancer				8
chr3:106569263-106569671	CBLB	(-981580)	BP00102:Signal transduction; BP00108:Receptor protein tyrosine kinase signaling pathway; hsa05200:Pathways in cancer				8
chr3:106581053-106581453	CBLB	(-993366)	BP00102:Signal transduction; BP00108:Receptor protein tyrosine kinase signaling pathway; hsa05200:Pathways in cancer				8
chr3:111480178-111480658	PHLDB2	(-98150)					8
chr3:111522253-111522653	PHLDB2	(-56115)					8
chr3:111615854-111616254	PHLDB2	(+37486)					8
chr3:111654804-111655204	PHLDB2	(+76436)					8
chr3:111675274-111675674	PHLDB2	(+96906)					8
chr3:111677833-111678233	PHLDB2	(+99465)					8
chr3:111681184-111681584	PHLDB2	(+102816)					8
chr3:112315932-112316332	CCDC80	(+43845)	BP00193:Developmental processes				8
chr3:112316878-112317278	CCDC80	(+42899)	BP00193:Developmental processes				8
chr3:112317808-112318208	CCDC80	(+41969)	BP00193:Developmental processes				8
chr3:112323322-112323722	CCDC80	(+36455)	BP00193:Developmental processes				8
chr3:112324162-112324562	CCDC80	(+35615)	BP00193:Developmental processes				8
chr3:112348409-112348809	CCDC80	(+11368)	BP00193:Developmental processes				8
chr3:112357209-112357609	CCDC80	(+2568)	BP00193:Developmental processes				8
chr3:112357815-112358215	CCDC80	(+1962)	BP00193:Developmental processes				8
chr3:112358505-112358905	CCDC80	(+1272)	BP00193:Developmental processes				8
chr3:112365952-112366352	CCDC80	(-6175)	BP00193:Developmental processes				8
chr3:112368222-112368795	CCDC80	(-8532)	BP00193:Developmental processes				8
chr3:112372265-112372732	CCDC80	(-12522)	BP00193:Developmental processes				8
chr3:112372745-112373181	CCDC80	(-12986)	BP00193:Developmental processes				8
chr3:112391464-112391864	CCDC80	(-31687)	BP00193:Developmental processes				8
chr3:112395774-112396197	CCDC80	(-36009)	BP00193:Developmental processes				8
chr3:112396357-112396757	CCDC80	(-36580)	BP00193:Developmental processes				8
chr3:112400444-112400844	CCDC80	(-40667)	BP00193:Developmental processes				8
chr3:112488978-112489378	CCDC80	(-129201)	BP00193:Developmental processes				8
chr3:122786490-122787426	PDIA5	(+1102)	BP00063:Protein modification				8
chr3:123324764-123325164	MYLK	(+278185)	BP00063:Protein modification; BP00064:Protein phosphorylation; BP00102:Signal transduction; BP00120:Cell adhesion-mediated signaling; BP00173:Muscle contraction; BP00274:Cell communication; BP00275:Extracellular matrix protein-mediated signaling; BP00285:Cell structure and motility; hsa04020:Calcium signaling pathway; hsa04270:Vascular smooth muscle contraction; hsa04510:Focal adhesion; hsa04810:…				8
chr3:123327324-123327782	MYLK	(+275596)	BP00063:Protein modification; BP00064:Protein phosphorylation; BP00102:Signal transduction; BP00120:Cell adhesion-mediated signaling; BP00173:Muscle contraction; BP00274:Cell communication; BP00275:Extracellular matrix protein-mediated signaling; BP00285:Cell structure and motility; hsa04020:Calcium signaling pathway; hsa04270:Vascular smooth muscle contraction; hsa04510:Focal adhesion; hsa04810:…				8
chr3:123347482-123347882	MYLK	(+255467)	BP00063:Protein modification; BP00064:Protein phosphorylation; BP00102:Signal transduction; BP00120:Cell adhesion-mediated signaling; BP00173:Muscle contraction; BP00274:Cell communication; BP00275:Extracellular matrix protein-mediated signaling; BP00285:Cell structure and motility; hsa04020:Calcium signaling pathway; hsa04270:Vascular smooth muscle contraction; hsa04510:Focal adhesion; hsa04810:…				8
chr3:123380434-123381012	MYLK	(+222426)	BP00063:Protein modification; BP00064:Protein phosphorylation; BP00102:Signal transduction; BP00120:Cell adhesion-mediated signaling; BP00173:Muscle contraction; BP00274:Cell communication; BP00275:Extracellular matrix protein-mediated signaling; BP00285:Cell structure and motility; hsa04020:Calcium signaling pathway; hsa04270:Vascular smooth muscle contraction; hsa04510:Focal adhesion; hsa04810:…				8
chr3:123407292-123407712	MYLK	(+195647)	BP00063:Protein modification; BP00064:Protein phosphorylation; BP00102:Signal transduction; BP00120:Cell adhesion-mediated signaling; BP00173:Muscle contraction; BP00274:Cell communication; BP00275:Extracellular matrix protein-mediated signaling; BP00285:Cell structure and motility; hsa04020:Calcium signaling pathway; hsa04270:Vascular smooth muscle contraction; hsa04510:Focal adhesion; hsa04810:…				8
chr3:123458552-123458952	MYLK	(+144397)	BP00063:Protein modification; BP00064:Protein phosphorylation; BP00102:Signal transduction; BP00120:Cell adhesion-mediated signaling; BP00173:Muscle contraction; BP00274:Cell communication; BP00275:Extracellular matrix protein-mediated signaling; BP00285:Cell structure and motility; hsa04020:Calcium signaling pathway; hsa04270:Vascular smooth muscle contraction; hsa04510:Focal adhesion; hsa04810:…				8
chr3:123601287-123601687	MYLK	(+1662)	BP00063:Protein modification; BP00064:Protein phosphorylation; BP00102:Signal transduction; BP00120:Cell adhesion-mediated signaling; BP00173:Muscle contraction; BP00274:Cell communication; BP00275:Extracellular matrix protein-mediated signaling; BP00285:Cell structure and motility; hsa04020:Calcium signaling pathway; hsa04270:Vascular smooth muscle contraction; hsa04510:Focal adhesion; hsa04810:…				8
chr3:123602296-123602696	MYLK	(+653)	BP00063:Protein modification; BP00064:Protein phosphorylation; BP00102:Signal transduction; BP00120:Cell adhesion-mediated signaling; BP00173:Muscle contraction; BP00274:Cell communication; BP00275:Extracellular matrix protein-mediated signaling; BP00285:Cell structure and motility; hsa04020:Calcium signaling pathway; hsa04270:Vascular smooth muscle contraction; hsa04510:Focal adhesion; hsa04810:…				8
chr3:126500583-126501060	PLXNA1	(-206615)	BP00063:Protein modification; BP00064:Protein phosphorylation; BP00102:Signal transduction; BP00108:Receptor protein tyrosine kinase signaling pathway; BP00193:Developmental processes; hsa04360:Axon guidance				8
chr3:126501223-126501720	PLXNA1	(-205965)	BP00063:Protein modification; BP00064:Protein phosphorylation; BP00102:Signal transduction; BP00108:Receptor protein tyrosine kinase signaling pathway; BP00193:Developmental processes; hsa04360:Axon guidance				8
chr3:126701230-126701701	PLXNA1	(-5971)	BP00063:Protein modification; BP00064:Protein phosphorylation; BP00102:Signal transduction; BP00108:Receptor protein tyrosine kinase signaling pathway; BP00193:Developmental processes; hsa04360:Axon guidance				8
chr3:134282972-134283372	KY	(+86692)					8
chr3:134319538-134319938	KY	(+50126)					8
chr3:134359792-134360192	KY	(+9872)					8
chr3:134369243-134370100	KY	(+192)					8
chr3:134370253-134370653	KY	(-589)					8
chr3:134405212-134405612	KY	(-35548)					8
chr3:149257813-149258213	WWTR1	(+117799)	BP00102:Signal transduction				8
chr3:149293543-149294063	WWTR1	(+82009)	BP00102:Signal transduction				8
chr3:149339113-149339513	WWTR1	(+36499)	BP00102:Signal transduction				8
chr3:149375123-149375523	WWTR1	(+489)	BP00102:Signal transduction				8
chr3:151921327-151921788	MBNL1	(-95636)	BP00193:Developmental processes				8
chr3:151922977-151923458	MBNL1	(-93976)	BP00193:Developmental processes				8
chr3:194106997-194107397	GP5	(+12798)	BP00124:Cell adhesion; hsa04640:Hematopoietic cell lineage				8
chr3:194206720-194207120	ATP13A3	(-17952)	BP00291:Calcium ion homeostasis	TMEM44	(+147230)		8
chr3:194247875-194248275	ATP13A3	(-59107)	BP00291:Calcium ion homeostasis	TMEM44	(+106075)		8
chr3:194295380-194296080	ATP13A3	(-106762)	BP00291:Calcium ion homeostasis	TMEM44	(+58420)		8
chr3:196763395-196763795	DLG1	(+261852)	BP00102:Signal transduction				8
chr3:196782638-196783038	DLG1	(+242609)	BP00102:Signal transduction				8
chr3:196810505-196810905	DLG1	(+214742)	BP00102:Signal transduction				8
chr3:196819115-196819515	DLG1	(+206132)	BP00102:Signal transduction				8
chr3:196820988-196821388	DLG1	(+204259)	BP00102:Signal transduction				8
chr3:196886385-196886785	DLG1	(+138862)	BP00102:Signal transduction				8
chr3:196896595-196896995	DLG1	(+128652)	BP00102:Signal transduction				8
chr3:196946345-196946745	DLG1	(+78902)	BP00102:Signal transduction				8
chr3:196961825-196962508	DLG1	(+63280)	BP00102:Signal transduction				8
chr3:197013158-197013685	DLG1	(+12025)	BP00102:Signal transduction				8
chr3:197024235-197024635	DLG1	(+1012)	BP00102:Signal transduction				8
chr4:7753180-7753580	AFAP1	(+188273)					8
chr4:7755302-7755702	AFAP1	(+186151)					8
chr4:7756372-7756772	AFAP1	(+185081)					8
chr4:7756972-7757752	AFAP1	(+184291)					8
chr4:7788450-7788850	AFAP1	(+153003)					8
chr4:7844092-7844892	AFAP1	(+97161)					8
chr4:7845242-7845642	AFAP1	(+96211)					8
chr4:7872722-7873122	AFAP1	(+68731)					8
chr4:7888570-7888970	AFAP1	(+52883)					8
chr4:7892662-7893062	AFAP1	(+48791)					8
chr4:15603040-15603440	FBXL5	(+53795)					8
chr4:15684111-15684651	FAM200B	(+1029)					8
chr4:26370791-26371191	RBPJ	(+48562)					8
chr4:26459750-26460150	RBPJ	(+137521)					8
chr4:38869800-38870528	FAM114A1	(+810)					8
chr4:38874170-38874570	FAM114A1	(+5016)					8
chr4:38921070-38921470	FAM114A1	(+51916)					8
chr4:38931570-38931970	FAM114A1	(+62416)					8
chr4:38950141-38950610	FAM114A1	(+81022)					8
chr4:57886457-57886857	POLR2B	(+41548)		IGFBP7	(+89894)	BP00224:Cell proliferation and differentiation	8
chr4:57888351-57888751	POLR2B	(+43442)		IGFBP7	(+88000)	BP00224:Cell proliferation and differentiation	8
chr4:57889891-57890291	POLR2B	(+44982)		IGFBP7	(+86460)	BP00224:Cell proliferation and differentiation	8
chr4:57955721-57956121	IGFBP7	(+20630)	BP00224:Cell proliferation and differentiation	POLR2B	(+110812)		8
chr4:57975914-57976314	IGFBP7	(+437)	BP00224:Cell proliferation and differentiation				8
chr4:109572533-109572973	OSTC	(+1012)					8
chr4:114880383-114880886	ARSJ	(+20243)					8
chr4:115285825-115286225	ARSJ	(-385147)					8
chr4:119640634-119641034	SEC24D	(+116492)					8
chr4:123685254-123685654	FGF2	(-62409)	BP00102:Signal transduction; BP00111:Intracellular signaling cascade; BP00193:Developmental processes; BP00207:Cell cycle control; BP00224:Cell proliferation and differentiation; BP00274:Cell communication; hsa04810:Regulation of actin cytoskeleton; hsa05200:Pathways in cancer				8
chr4:123685984-123686384	FGF2	(-61679)	BP00102:Signal transduction; BP00111:Intracellular signaling cascade; BP00193:Developmental processes; BP00207:Cell cycle control; BP00224:Cell proliferation and differentiation; BP00274:Cell communication; hsa04810:Regulation of actin cytoskeleton; hsa05200:Pathways in cancer				8
chr4:123686814-123687214	FGF2	(-60849)	BP00102:Signal transduction; BP00111:Intracellular signaling cascade; BP00193:Developmental processes; BP00207:Cell cycle control; BP00224:Cell proliferation and differentiation; BP00274:Cell communication; hsa04810:Regulation of actin cytoskeleton; hsa05200:Pathways in cancer				8
chr4:123704538-123705047	FGF2	(-43070)	BP00102:Signal transduction; BP00111:Intracellular signaling cascade; BP00193:Developmental processes; BP00207:Cell cycle control; BP00224:Cell proliferation and differentiation; BP00274:Cell communication; hsa04810:Regulation of actin cytoskeleton; hsa05200:Pathways in cancer				8
chr4:123749048-123749464	FGF2	(+1393)	BP00102:Signal transduction; BP00111:Intracellular signaling cascade; BP00193:Developmental processes; BP00207:Cell cycle control; BP00224:Cell proliferation and differentiation; BP00274:Cell communication; hsa04810:Regulation of actin cytoskeleton; hsa05200:Pathways in cancer	NUDT6	(+94505)	BP00224:Cell proliferation and differentiation	8
chr4:123822706-123823106	NUDT6	(+20855)	BP00224:Cell proliferation and differentiation	FGF2	(+75043)	BP00102:Signal transduction; BP00111:Intracellular signaling cascade; BP00193:Developmental processes; BP00207:Cell cycle control; BP00224:Cell proliferation and differentiation; BP00274:Cell communication; hsa04810:Regulation of actin cytoskeleton; hsa05200:Pathways in cancer	8
chr4:123824564-123824964	NUDT6	(+18997)	BP00224:Cell proliferation and differentiation	FGF2	(+76901)	BP00102:Signal transduction; BP00111:Intracellular signaling cascade; BP00193:Developmental processes; BP00207:Cell cycle control; BP00224:Cell proliferation and differentiation; BP00274:Cell communication; hsa04810:Regulation of actin cytoskeleton; hsa05200:Pathways in cancer	8
chr4:123825254-123825654	NUDT6	(+18307)	BP00224:Cell proliferation and differentiation	FGF2	(+77591)	BP00102:Signal transduction; BP00111:Intracellular signaling cascade; BP00193:Developmental processes; BP00207:Cell cycle control; BP00224:Cell proliferation and differentiation; BP00274:Cell communication; hsa04810:Regulation of actin cytoskeleton; hsa05200:Pathways in cancer	8
chr4:123826966-123827366	NUDT6	(+16595)	BP00224:Cell proliferation and differentiation	FGF2	(+79303)	BP00102:Signal transduction; BP00111:Intracellular signaling cascade; BP00193:Developmental processes; BP00207:Cell cycle control; BP00224:Cell proliferation and differentiation; BP00274:Cell communication; hsa04810:Regulation of actin cytoskeleton; hsa05200:Pathways in cancer	8
chr4:151020003-151020403	DCLK2	(+20777)	BP00063:Protein modification; BP00064:Protein phosphorylation; BP00285:Cell structure and motility; BP00286:Cell structure				8
chr4:151146183-151146583	DCLK2	(+146957)	BP00063:Protein modification; BP00064:Protein phosphorylation; BP00285:Cell structure and motility; BP00286:Cell structure				8
chr4:151157151-151157551	DCLK2	(+157925)	BP00063:Protein modification; BP00064:Protein phosphorylation; BP00285:Cell structure and motility; BP00286:Cell structure				8
chr4:151157591-151158011	DCLK2	(+158375)	BP00063:Protein modification; BP00064:Protein phosphorylation; BP00285:Cell structure and motility; BP00286:Cell structure				8
chr4:151182611-151183011	DCLK2	(+183385)	BP00063:Protein modification; BP00064:Protein phosphorylation; BP00285:Cell structure and motility; BP00286:Cell structure				8
chr4:151201191-151201591	DCLK2	(+201965)	BP00063:Protein modification; BP00064:Protein phosphorylation; BP00285:Cell structure and motility; BP00286:Cell structure				8
chr4:151201779-151202231	DCLK2	(+202579)	BP00063:Protein modification; BP00064:Protein phosphorylation; BP00285:Cell structure and motility; BP00286:Cell structure				8
chr4:186159855-186160255	SNX25	(+28771)	BP00102:Signal transduction; BP00111:Intracellular signaling cascade; BP00119:Other intracellular signaling cascade; BP00274:Cell communication	LRP2BP	(+140097)		8
chr4:186245071-186245471	LRP2BP	(+54881)		SNX25	(+113987)	BP00102:Signal transduction; BP00111:Intracellular signaling cascade; BP00119:Other intracellular signaling cascade; BP00274:Cell communication	8
chr4:187765395-187765795	FAT1	(-120608)	BP00102:Signal transduction; BP00120:Cell adhesion-mediated signaling; BP00124:Cell adhesion; BP00193:Developmental processes; BP00242:Embryogenesis; BP00274:Cell communication; BP00285:Cell structure and motility; BP00286:Cell structure; BP00287:Cell motility				8
chr4:188400078-188400478	FAT1	(-755291)	BP00102:Signal transduction; BP00120:Cell adhesion-mediated signaling; BP00124:Cell adhesion; BP00193:Developmental processes; BP00242:Embryogenesis; BP00274:Cell communication; BP00285:Cell structure and motility; BP00286:Cell structure; BP00287:Cell motility				8
chr5:10676476-10676876	DAP	(+84711)	BP00102:Signal transduction; BP00111:Intracellular signaling cascade				8
chr5:14701206-14701606	ANKH	(+170481)					8
chr5:14786288-14786688	ANKH	(+85399)					8
chr5:14856716-14857116	ANKH	(+14971)					8
chr5:14900851-14901251	ANKH	(-29164)					8
chr5:14925409-14925809	ANKH	(-53722)					8
chr5:14926049-14926449	ANKH	(-54362)					8
chr5:15007849-15008249	ANKH	(-136162)					8
chr5:15008549-15009173	ANKH	(-136974)					8
chr5:15021566-15021966	ANKH	(-149879)					8
chr5:34053277-34053697	RAI14	(-603109)					8
chr5:34571121-34571521	RAI14	(-85275)					8
chr5:34666495-34666895	RAI14	(+10099)					8
chr5:34789425-34789825	RAI14	(+133029)					8
chr5:39365469-39366407	C9	(-1283)					8
chr5:39368312-39368712	C9	(-3857)					8
chr5:39400842-39401242	C9	(-36387)		DAB2	(+24293)	BP00102:Signal transduction; BP00111:Intracellular signaling cascade	8
chr5:39420987-39421387	C9	(-56532)		DAB2	(+4148)	BP00102:Signal transduction; BP00111:Intracellular signaling cascade	8
chr5:39422827-39423227	C9	(-58372)		DAB2	(+2308)	BP00102:Signal transduction; BP00111:Intracellular signaling cascade	8
chr5:39423332-39423817	C9	(-58920)		DAB2	(+1760)	BP00102:Signal transduction; BP00111:Intracellular signaling cascade	8
chr5:39423877-39424382	C9	(-59475)		DAB2	(+1205)	BP00102:Signal transduction; BP00111:Intracellular signaling cascade	8
chr5:57120472-57120872	PLK2	(+635294)	BP00063:Protein modification; BP00064:Protein phosphorylation; BP00102:Signal transduction; BP00111:Intracellular signaling cascade; BP00193:Developmental processes; BP00224:Cell proliferation and differentiation; BP00242:Embryogenesis				8
chr5:57748316-57748864	PLK2	(+7376)	BP00063:Protein modification; BP00064:Protein phosphorylation; BP00102:Signal transduction; BP00111:Intracellular signaling cascade; BP00193:Developmental processes; BP00224:Cell proliferation and differentiation; BP00242:Embryogenesis				8
chr5:57748874-57749402	PLK2	(+6828)	BP00063:Protein modification; BP00064:Protein phosphorylation; BP00102:Signal transduction; BP00111:Intracellular signaling cascade; BP00193:Developmental processes; BP00224:Cell proliferation and differentiation; BP00242:Embryogenesis				8
chr5:57754636-57755554	PLK2	(+871)	BP00063:Protein modification; BP00064:Protein phosphorylation; BP00102:Signal transduction; BP00111:Intracellular signaling cascade; BP00193:Developmental processes; BP00224:Cell proliferation and differentiation; BP00242:Embryogenesis				8
chr5:64458525-64458925	ADAMTS6	(+318979)	BP00102:Signal transduction; BP00120:Cell adhesion-mediated signaling; BP00274:Cell communication				8
chr5:64486443-64487113	ADAMTS6	(+290926)	BP00102:Signal transduction; BP00120:Cell adhesion-mediated signaling; BP00274:Cell communication				8
chr5:64494023-64494713	ADAMTS6	(+283336)	BP00102:Signal transduction; BP00120:Cell adhesion-mediated signaling; BP00274:Cell communication				8
chr5:64494783-64495203	ADAMTS6	(+282711)	BP00102:Signal transduction; BP00120:Cell adhesion-mediated signaling; BP00274:Cell communication				8
chr5:64495343-64495763	ADAMTS6	(+282151)	BP00102:Signal transduction; BP00120:Cell adhesion-mediated signaling; BP00274:Cell communication				8
chr5:64495803-64496203	ADAMTS6	(+281701)	BP00102:Signal transduction; BP00120:Cell adhesion-mediated signaling; BP00274:Cell communication				8
chr5:64500243-64500643	ADAMTS6	(+277261)	BP00102:Signal transduction; BP00120:Cell adhesion-mediated signaling; BP00274:Cell communication				8
chr5:64505073-64505580	ADAMTS6	(+272377)	BP00102:Signal transduction; BP00120:Cell adhesion-mediated signaling; BP00274:Cell communication				8
chr5:64557933-64558333	ADAMTS6	(+219571)	BP00102:Signal transduction; BP00120:Cell adhesion-mediated signaling; BP00274:Cell communication				8
chr5:64558393-64558793	ADAMTS6	(+219111)	BP00102:Signal transduction; BP00120:Cell adhesion-mediated signaling; BP00274:Cell communication				8
chr5:64587000-64587400	ADAMTS6	(+190504)	BP00102:Signal transduction; BP00120:Cell adhesion-mediated signaling; BP00274:Cell communication				8
chr5:71425380-71425780	MAP1B	(+22462)	BP00285:Cell structure and motility				8
chr5:71437648-71438127	MAP1B	(+34770)	BP00285:Cell structure and motility				8
chr5:71492720-71493120	MAP1B	(+89802)	BP00285:Cell structure and motility				8
chr5:71507130-71507530	MAP1B	(+104212)	BP00285:Cell structure and motility				8
chr5:77821155-77821555	LHFPL2	(+123293)					8
chr5:77843745-77844145	LHFPL2	(+100703)					8
chr5:77890735-77891212	LHFPL2	(+53674)					8
chr5:77943218-77944289	LHFPL2	(+894)					8
chr5:78094991-78095391	LHFPL2	(-150543)					8
chr5:86316034-86316434	RASA1	(-247836)	BP00102:Signal transduction; hsa04360:Axon guidance				8
chr5:86416119-86416852	RASA1	(-147584)	BP00102:Signal transduction; hsa04360:Axon guidance				8
chr5:86564077-86564730	RASA1	(+334)	BP00102:Signal transduction; hsa04360:Axon guidance				8
chr5:86568101-86568501	RASA1	(+4231)	BP00102:Signal transduction; hsa04360:Axon guidance	CCNH	(+140549)	BP00207:Cell cycle control	8
chr5:86568621-86569021	RASA1	(+4751)	BP00102:Signal transduction; hsa04360:Axon guidance	CCNH	(+140029)	BP00207:Cell cycle control	8
chr5:86590140-86590540	RASA1	(+26270)	BP00102:Signal transduction; hsa04360:Axon guidance	CCNH	(+118510)	BP00207:Cell cycle control	8
chr5:86694740-86695490	CCNH	(+13735)	BP00207:Cell cycle control	RASA1	(+131045)	BP00102:Signal transduction; hsa04360:Axon guidance	8
chr5:86696541-86696941	CCNH	(+12109)	BP00207:Cell cycle control	RASA1	(+132671)	BP00102:Signal transduction; hsa04360:Axon guidance	8
chr5:86701790-86702190	CCNH	(+6860)	BP00207:Cell cycle control	RASA1	(+137920)	BP00102:Signal transduction; hsa04360:Axon guidance	8
chr5:121399469-121399948	LOX	(+14346)	BP00124:Cell adhesion; BP00264:Tumor suppressor				8
chr5:121427775-121428175	LOX	(-13920)	BP00124:Cell adhesion; BP00264:Tumor suppressor				8
chr5:121428985-121429505	LOX	(-15190)	BP00124:Cell adhesion; BP00264:Tumor suppressor				8
chr5:136478547-136478947	SPOCK1	(+356271)					8
chr5:136481890-136482630	SPOCK1	(+352758)					8
chr5:139040485-139040926	CXXC5	(+12405)					8
chr5:139126451-139126851	CXXC5	(+98350)					8
chr5:140887502-140887902	PCDHGC5	(+18894)	BP00102:Signal transduction; BP00120:Cell adhesion-mediated signaling; BP00124:Cell adhesion; BP00274:Cell communication				8
chr5:140888102-140888502	PCDHGC5	(+19494)	BP00102:Signal transduction; BP00120:Cell adhesion-mediated signaling; BP00124:Cell adhesion; BP00274:Cell communication				8
chr5:142000940-142001370	FGF1	(+64498)	BP00102:Signal transduction; BP00111:Intracellular signaling cascade; BP00193:Developmental processes; BP00203:Cell cycle; BP00207:Cell cycle control; BP00224:Cell proliferation and differentiation; BP00274:Cell communication; hsa04810:Regulation of actin cytoskeleton; hsa05200:Pathways in cancer				8
chr5:142024163-142024563	FGF1	(+41290)	BP00102:Signal transduction; BP00111:Intracellular signaling cascade; BP00193:Developmental processes; BP00203:Cell cycle; BP00207:Cell cycle control; BP00224:Cell proliferation and differentiation; BP00274:Cell communication; hsa04810:Regulation of actin cytoskeleton; hsa05200:Pathways in cancer				8
chr5:142024693-142025093	FGF1	(+40760)	BP00102:Signal transduction; BP00111:Intracellular signaling cascade; BP00193:Developmental processes; BP00203:Cell cycle; BP00207:Cell cycle control; BP00224:Cell proliferation and differentiation; BP00274:Cell communication; hsa04810:Regulation of actin cytoskeleton; hsa05200:Pathways in cancer				8
chr5:142092776-142093176	FGF1	(-27323)	BP00102:Signal transduction; BP00111:Intracellular signaling cascade; BP00193:Developmental processes; BP00203:Cell cycle; BP00207:Cell cycle control; BP00224:Cell proliferation and differentiation; BP00274:Cell communication; hsa04810:Regulation of actin cytoskeleton; hsa05200:Pathways in cancer				8
chr5:142381574-142381974	NR3C1	(+402271)					8
chr5:142622463-142622863	NR3C1	(+161382)					8
chr5:142622873-142623273	NR3C1	(+160972)					8
chr5:142623363-142624243	NR3C1	(+160242)					8
chr5:142624363-142624763	NR3C1	(+159482)					8
chr5:142732827-142733227	NR3C1	(+51018)					8
chr5:142748448-142748848	NR3C1	(+35397)					8
chr5:142915929-142916329	NR3C1	(-132084)					8
chr5:143536292-143536777	NR3C1	(-752490)					8
chr5:143537252-143537652	NR3C1	(-753407)					8
chr5:149445560-149446450	CSF1R	(+46930)	BP00063:Protein modification; BP00064:Protein phosphorylation; BP00102:Signal transduction; BP00108:Receptor protein tyrosine kinase signaling pathway; BP00193:Developmental processes; BP00224:Cell proliferation and differentiation; BP00242:Embryogenesis; BP00285:Cell structure and motility; BP00287:Cell motility; hsa04640:Hematopoietic cell lineage; hsa05200:Pathways in cancer				8
chr5:149446500-149446900	CSF1R	(+46235)	BP00063:Protein modification; BP00064:Protein phosphorylation; BP00102:Signal transduction; BP00108:Receptor protein tyrosine kinase signaling pathway; BP00193:Developmental processes; BP00224:Cell proliferation and differentiation; BP00242:Embryogenesis; BP00285:Cell structure and motility; BP00287:Cell motility; hsa04640:Hematopoietic cell lineage; hsa05200:Pathways in cancer				8
chr5:149594004-149594404	CAMK2A	(+75199)	BP00063:Protein modification; BP00064:Protein phosphorylation; BP00102:Signal transduction; BP00111:Intracellular signaling cascade; BP00112:Calcium mediated signaling; BP00173:Muscle contraction; BP00193:Developmental processes; hsa04020:Calcium signaling pathway; hsa04916:Melanogenesis; hsa05214:Glioma				8
chr5:149643189-149643589	CAMK2A	(+26014)	BP00063:Protein modification; BP00064:Protein phosphorylation; BP00102:Signal transduction; BP00111:Intracellular signaling cascade; BP00112:Calcium mediated signaling; BP00173:Muscle contraction; BP00193:Developmental processes; hsa04020:Calcium signaling pathway; hsa04916:Melanogenesis; hsa05214:Glioma				8
chr5:149678763-149679163	CAMK2A	(-9560)	BP00063:Protein modification; BP00064:Protein phosphorylation; BP00102:Signal transduction; BP00111:Intracellular signaling cascade; BP00112:Calcium mediated signaling; BP00173:Muscle contraction; BP00193:Developmental processes; hsa04020:Calcium signaling pathway; hsa04916:Melanogenesis; hsa05214:Glioma				8
chr5:150021315-150021715	SYNPO	(+40873)	BP00193:Developmental processes; BP00285:Cell structure and motility; BP00286:Cell structure; BP00287:Cell motility				8
chr5:150021760-150022160	SYNPO	(+41318)	BP00193:Developmental processes; BP00285:Cell structure and motility; BP00286:Cell structure; BP00287:Cell motility				8
chr5:151098087-151098487	SPARC	(-31770)					8
chr5:151119860-151120260	SPARC	(-53543)					8
chr5:151120279-151120844	SPARC	(-54045)					8
chr5:151124584-151124984	SPARC	(-58267)					8
chr5:153569301-153569767	GALNT10	(-761)	BP00063:Protein modification				8
chr5:153570541-153570941	GALNT10	(+446)	BP00063:Protein modification				8
chr5:153600167-153600567	GALNT10	(+30072)	BP00063:Protein modification				8
chr5:153600767-153601167	GALNT10	(+30672)	BP00063:Protein modification				8
chr5:153649931-153650331	GALNT10	(+79836)	BP00063:Protein modification				8
chr5:157002559-157002959	ADAM19	(+24)	BP00102:Signal transduction; BP00120:Cell adhesion-mediated signaling; BP00193:Developmental processes; BP00274:Cell communication				8
chr5:171538091-171538769	STK10	(+76916)	BP00063:Protein modification; BP00064:Protein phosphorylation				8
chr5:171614120-171614520	STK10	(+1026)	BP00063:Protein modification; BP00064:Protein phosphorylation				8
chr5:176921377-176921777	PDLIM7	(+3025)	BP00193:Developmental processes; BP00285:Cell structure and motility; BP00287:Cell motility				8
chr5:176922365-176922767	PDLIM7	(+2036)	BP00193:Developmental processes; BP00285:Cell structure and motility; BP00287:Cell motility				8
chr5:176923615-176924067	PDLIM7	(+761)	BP00193:Developmental processes; BP00285:Cell structure and motility; BP00287:Cell motility				8
chr6:3717798-3718198	PXDC1	(+34248)					8
chr6:3718368-3718768	PXDC1	(+33678)					8
chr6:3719797-3720197	PXDC1	(+32249)					8
chr6:7468681-7469081	DSP	(-72989)	hsa05412:Arrhythmogenic right ventricular cardiomyopathy (ARVC)				8
chr6:16332924-16333324	ATXN1	(+428597)					8
chr6:16339160-16339560	ATXN1	(+422361)					8
chr6:16683933-16684333	ATXN1	(+77588)					8
chr6:16713123-16713523	ATXN1	(+48398)					8
chr6:16741733-16742133	ATXN1	(+19788)					8
chr6:16752683-16753083	ATXN1	(+8838)					8
chr6:16762013-16762513	ATXN1	(-542)					8
chr6:16762833-16763233	ATXN1	(-1312)					8
chr6:16849836-16850236	ATXN1	(-88315)					8
chr6:17393692-17394092	CAP2	(+156)	BP00102:Signal transduction; BP00111:Intracellular signaling cascade; BP00119:Other intracellular signaling cascade; BP00274:Cell communication; BP00285:Cell structure and motility				8
chr6:17418181-17418971	CAP2	(+24840)	BP00102:Signal transduction; BP00111:Intracellular signaling cascade; BP00119:Other intracellular signaling cascade; BP00274:Cell communication; BP00285:Cell structure and motility				8
chr6:25137733-25138133	CMAHP	(+118)					8
chr6:25166550-25166950	CMAHP	(-28699)					8
chr6:25169860-25170260	CMAHP	(-32009)					8
chr6:25193937-25194337	CMAHP	(-56086)					8
chr6:30650350-30650851	PPP1R18	(+4492)					8
chr6:30653871-30654271	PPP1R18	(+1022)					8
chr6:30710326-30711126	FLOT1	(-273)	BP00224:Cell proliferation and differentiation				8
chr6:30711416-30711816	FLOT1	(-1163)	BP00224:Cell proliferation and differentiation	IER3	(+711)		8
chr6:30720279-30720767	IER3	(-8196)					8
chr6:30737116-30737516	IER3	(-24989)					8
chr6:30749443-30749843	IER3	(-37316)					8
chr6:30787970-30788390	IER3	(-75853)					8
chr6:31702006-31702406	DDAH2	(-4167)	BP00224:Cell proliferation and differentiation				8
chr6:31702582-31703266	DDAH2	(-4885)	BP00224:Cell proliferation and differentiation				8
chr6:33288151-33288551	ZBTB22	(-2632)					8
chr6:33581725-33582125	ITPR3	(-7231)	BP00102:Signal transduction; BP00111:Intracellular signaling cascade; BP00112:Calcium mediated signaling; BP00173:Muscle contraction; BP00285:Cell structure and motility; BP00287:Cell motility; hsa04020:Calcium signaling pathway; hsa04070:Phosphatidylinositol signaling system				8
chr6:33589450-33589850	ITPR3	(+494)	BP00102:Signal transduction; BP00111:Intracellular signaling cascade; BP00112:Calcium mediated signaling; BP00173:Muscle contraction; BP00285:Cell structure and motility; BP00287:Cell motility; hsa04020:Calcium signaling pathway; hsa04070:Phosphatidylinositol signaling system				8
chr6:33595660-33596060	ITPR3	(+6704)	BP00102:Signal transduction; BP00111:Intracellular signaling cascade; BP00112:Calcium mediated signaling; BP00173:Muscle contraction; BP00285:Cell structure and motility; BP00287:Cell motility; hsa04020:Calcium signaling pathway; hsa04070:Phosphatidylinositol signaling system	C6orf125	(+83644)		8
chr6:33602120-33602520	ITPR3	(+13164)	BP00102:Signal transduction; BP00111:Intracellular signaling cascade; BP00112:Calcium mediated signaling; BP00173:Muscle contraction; BP00285:Cell structure and motility; BP00287:Cell motility; hsa04020:Calcium signaling pathway; hsa04070:Phosphatidylinositol signaling system	C6orf125	(+77184)		8
chr6:33626035-33626435	ITPR3	(+37079)	BP00102:Signal transduction; BP00111:Intracellular signaling cascade; BP00112:Calcium mediated signaling; BP00173:Muscle contraction; BP00285:Cell structure and motility; BP00287:Cell motility; hsa04020:Calcium signaling pathway; hsa04070:Phosphatidylinositol signaling system	C6orf125	(+53269)		8
chr6:33668270-33668670	C6orf125	(+11034)		ITPR3	(+79314)	BP00102:Signal transduction; BP00111:Intracellular signaling cascade; BP00112:Calcium mediated signaling; BP00173:Muscle contraction; BP00285:Cell structure and motility; BP00287:Cell motility; hsa04020:Calcium signaling pathway; hsa04070:Phosphatidylinositol signaling system	8
chr6:33671960-33672360	C6orf125	(+7344)		ITPR3	(+83004)	BP00102:Signal transduction; BP00111:Intracellular signaling cascade; BP00112:Calcium mediated signaling; BP00173:Muscle contraction; BP00285:Cell structure and motility; BP00287:Cell motility; hsa04020:Calcium signaling pathway; hsa04070:Phosphatidylinositol signaling system	8
chr6:33673930-33674530	C6orf125	(+5274)		ITPR3	(+85074)	BP00102:Signal transduction; BP00111:Intracellular signaling cascade; BP00112:Calcium mediated signaling; BP00173:Muscle contraction; BP00285:Cell structure and motility; BP00287:Cell motility; hsa04020:Calcium signaling pathway; hsa04070:Phosphatidylinositol signaling system	8
chr6:41649777-41650177	TFEB	(+41487)					8
chr6:41701971-41702371	TFEB	(-10707)		TFEB	(+1826)		8
chr6:44190910-44191650	SLC29A1	(-16)	BP00224:Cell proliferation and differentiation				8
chr6:44192000-44192400	SLC29A1	(+904)	BP00224:Cell proliferation and differentiation				8
chr6:56313598-56313998	DST	(+193896)	BP00124:Cell adhesion; BP00203:Cell cycle; BP00207:Cell cycle control; BP00285:Cell structure and motility				8
chr6:56446308-56446708	DST	(+61186)	BP00124:Cell adhesion; BP00203:Cell cycle; BP00207:Cell cycle control; BP00285:Cell structure and motility				8
chr6:56614533-56614933	DST	(-107039)	BP00124:Cell adhesion; BP00203:Cell cycle; BP00207:Cell cycle control; BP00285:Cell structure and motility				8
chr6:56682828-56683228	DST	(-175334)	BP00124:Cell adhesion; BP00203:Cell cycle; BP00207:Cell cycle control; BP00285:Cell structure and motility				8
chr6:56707408-56707808	DST	(-199914)	BP00124:Cell adhesion; BP00203:Cell cycle; BP00207:Cell cycle control; BP00285:Cell structure and motility				8
chr6:116718626-116719026	DSE	(+117543)					8
chr6:116727166-116727622	DSE	(+126111)					8
chr6:116756502-116756902	DSE	(+155419)					8
chr6:152447892-152448292	SYNE1	(+510442)					8
chr6:152518062-152518462	SYNE1	(+440272)					8
chr6:152557992-152558392	SYNE1	(+400342)					8
chr6:152574402-152574802	SYNE1	(+383932)					8
chr6:152593094-152593572	SYNE1	(+365201)					8
chr6:152702172-152702599	SYNE1	(+256148)					8
chr6:152702781-152703181	SYNE1	(+255553)					8
chr6:158312443-158312843	SYNJ2	(-90245)	hsa04070:Phosphatidylinositol signaling system				8
chr6:158383789-158384189	SYNJ2	(-18899)	hsa04070:Phosphatidylinositol signaling system				8
chr6:158402735-158403137	SYNJ2	(+48)	hsa04070:Phosphatidylinositol signaling system				8
chr6:158447205-158447927	SYNJ2	(+44678)	hsa04070:Phosphatidylinositol signaling system	SERAC1	(+141746)		8
chr6:158448105-158448505	SYNJ2	(+45417)	hsa04070:Phosphatidylinositol signaling system	SERAC1	(+141007)		8
chr6:158452310-158452710	SYNJ2	(+49622)	hsa04070:Phosphatidylinositol signaling system	SERAC1	(+136802)		8
chr6:158452838-158453238	SYNJ2	(+50150)	hsa04070:Phosphatidylinositol signaling system	SERAC1	(+136274)		8
chr6:158461800-158462200	SYNJ2	(+59112)	hsa04070:Phosphatidylinositol signaling system	SERAC1	(+127312)		8
chr6:158477595-158478157	SYNJ2	(+74988)	hsa04070:Phosphatidylinositol signaling system	SERAC1	(+111436)		8
chr6:158478215-158478687	SYNJ2	(+75563)	hsa04070:Phosphatidylinositol signaling system	SERAC1	(+110861)		8
chr6:158481317-158481755	SYNJ2	(+78648)	hsa04070:Phosphatidylinositol signaling system	SERAC1	(+107776)		8
chr6:158481927-158482467	SYNJ2	(+79309)	hsa04070:Phosphatidylinositol signaling system	SERAC1	(+107115)		8
chr6:158502027-158502427	SERAC1	(+87085)		SYNJ2	(+99339)	hsa04070:Phosphatidylinositol signaling system	8
chr6:158532035-158532435	SERAC1	(+57077)		SYNJ2	(+129347)	hsa04070:Phosphatidylinositol signaling system	8
chr6:158532925-158533325	SERAC1	(+56187)		SYNJ2	(+130237)	hsa04070:Phosphatidylinositol signaling system	8
chr6:158533695-158534095	SERAC1	(+55417)		SYNJ2	(+131007)	hsa04070:Phosphatidylinositol signaling system	8
chr6:158534315-158534715	SERAC1	(+54797)		SYNJ2	(+131627)	hsa04070:Phosphatidylinositol signaling system	8
chr6:158534805-158535205	SERAC1	(+54307)		SYNJ2	(+132117)	hsa04070:Phosphatidylinositol signaling system	8
chr6:158536345-158537092	SERAC1	(+52593)		SYNJ2	(+133831)	hsa04070:Phosphatidylinositol signaling system	8
chr6:158538085-158538485	SERAC1	(+51027)		SYNJ2	(+135397)	hsa04070:Phosphatidylinositol signaling system	8
chr7:1127597-1128055	GPER	(+103)	BP00102:Signal transduction				8
chr7:1577428-1577859	MAFK	(+7276)	BP00224:Cell proliferation and differentiation	TMEM184A	(+18422)		8
chr7:1701960-1702480	TMEM184A	(-106154)		ELFN1	(-46578)		8
chr7:1704410-1704810	TMEM184A	(-108544)		ELFN1	(-44188)		8
chr7:1709623-1710023	TMEM184A	(-113757)		ELFN1	(-38975)		8
chr7:1979174-1979574	ELFN1	(+230576)					8
chr7:6296217-6296617	CYTH3	(+15825)					8
chr7:6310677-6311077	CYTH3	(+1365)					8
chr7:22600980-22601380	STEAP1B	(-61279)					8
chr7:22603180-22603762	STEAP1B	(-63570)					8
chr7:22604350-22604750	STEAP1B	(-64649)					8
chr7:22629230-22629630	STEAP1B	(-89529)					8
chr7:24826502-24826948	OSBPL3	(+193035)					8
chr7:24860916-24861402	OSBPL3	(+158601)					8
chr7:25010413-25010813	OSBPL3	(+9147)					8
chr7:25020707-25021366	OSBPL3	(-1277)					8
chr7:32108874-32109274	PDE1C	(+229309)	BP00102:Signal transduction; hsa04020:Calcium signaling pathway				8
chr7:32109584-32109984	PDE1C	(+228599)	BP00102:Signal transduction; hsa04020:Calcium signaling pathway				8
chr7:39748839-39749239	RALA	(+85887)	BP00102:Signal transduction; BP00193:Developmental processes; BP00242:Embryogenesis; BP00285:Cell structure and motility; BP00287:Cell motility; hsa05200:Pathways in cancer				8
chr7:39749319-39749996	RALA	(+86506)	BP00102:Signal transduction; BP00193:Developmental processes; BP00242:Embryogenesis; BP00285:Cell structure and motility; BP00287:Cell motility; hsa05200:Pathways in cancer				8
chr7:39750386-39750786	RALA	(+87434)	BP00102:Signal transduction; BP00193:Developmental processes; BP00242:Embryogenesis; BP00285:Cell structure and motility; BP00287:Cell motility; hsa05200:Pathways in cancer				8
chr7:41722534-41722934	INHBA	(+19972)	BP00102:Signal transduction; BP00193:Developmental processes; BP00224:Cell proliferation and differentiation				8
chr7:41732908-41733308	INHBA	(+9598)	BP00102:Signal transduction; BP00193:Developmental processes; BP00224:Cell proliferation and differentiation				8
chr7:41735194-41735594	INHBA	(+7312)	BP00102:Signal transduction; BP00193:Developmental processes; BP00224:Cell proliferation and differentiation				8
chr7:41735668-41736248	INHBA	(+6748)	BP00102:Signal transduction; BP00193:Developmental processes; BP00224:Cell proliferation and differentiation				8
chr7:41737988-41738414	INHBA	(+4505)	BP00102:Signal transduction; BP00193:Developmental processes; BP00224:Cell proliferation and differentiation				8
chr7:41738458-41738858	INHBA	(+4048)	BP00102:Signal transduction; BP00193:Developmental processes; BP00224:Cell proliferation and differentiation				8
chr7:41739094-41739588	INHBA	(+3365)	BP00102:Signal transduction; BP00193:Developmental processes; BP00224:Cell proliferation and differentiation				8
chr7:41740388-41741318	INHBA	(+1853)	BP00102:Signal transduction; BP00193:Developmental processes; BP00224:Cell proliferation and differentiation				8
chr7:41742444-41742853	INHBA	(+57)	BP00102:Signal transduction; BP00193:Developmental processes; BP00224:Cell proliferation and differentiation				8
chr7:41918593-41918993	INHBA	(-176087)	BP00102:Signal transduction; BP00193:Developmental processes; BP00224:Cell proliferation and differentiation				8
chr7:41920013-41920413	INHBA	(-177507)	BP00102:Signal transduction; BP00193:Developmental processes; BP00224:Cell proliferation and differentiation				8
chr7:41925273-41925673	INHBA	(-182767)	BP00102:Signal transduction; BP00193:Developmental processes; BP00224:Cell proliferation and differentiation				8
chr7:41925703-41926103	INHBA	(-183197)	BP00102:Signal transduction; BP00193:Developmental processes; BP00224:Cell proliferation and differentiation				8
chr7:41926533-41926933	INHBA	(-184027)	BP00102:Signal transduction; BP00193:Developmental processes; BP00224:Cell proliferation and differentiation				8
chr7:41951827-41952227	INHBA	(-209321)	BP00102:Signal transduction; BP00193:Developmental processes; BP00224:Cell proliferation and differentiation				8
chr7:41955080-41955840	INHBA	(-212754)	BP00102:Signal transduction; BP00193:Developmental processes; BP00224:Cell proliferation and differentiation				8
chr7:41955960-41956377	INHBA	(-213463)	BP00102:Signal transduction; BP00193:Developmental processes; BP00224:Cell proliferation and differentiation				8
chr7:44127075-44127475	AEBP1	(-16685)					8
chr7:44143825-44144225	AEBP1	(+65)					8
chr7:44144269-44145249	AEBP1	(+799)					8
chr7:44152451-44152875	AEBP1	(+8703)		POLD2	(+10484)		8
chr7:44153365-44154145	POLD2	(+9392)		AEBP1	(+9795)		8
chr7:45949140-45949540	IGFBP3	(+11531)	BP00102:Signal transduction; BP00274:Cell communication; BP00275:Extracellular matrix protein-mediated signaling				8
chr7:45949870-45950270	IGFBP3	(+10801)	BP00102:Signal transduction; BP00274:Cell communication; BP00275:Extracellular matrix protein-mediated signaling				8
chr7:45950750-45951150	IGFBP3	(+9921)	BP00102:Signal transduction; BP00274:Cell communication; BP00275:Extracellular matrix protein-mediated signaling				8
chr7:45960619-45961045	IGFBP3	(+39)	BP00102:Signal transduction; BP00274:Cell communication; BP00275:Extracellular matrix protein-mediated signaling				8
chr7:45983636-45984036	IGFBP3	(-22965)	BP00102:Signal transduction; BP00274:Cell communication; BP00275:Extracellular matrix protein-mediated signaling				8
chr7:46018005-46018405	IGFBP3	(-57334)	BP00102:Signal transduction; BP00274:Cell communication; BP00275:Extracellular matrix protein-mediated signaling				8
chr7:46184770-46185170	IGFBP3	(-224099)	BP00102:Signal transduction; BP00274:Cell communication; BP00275:Extracellular matrix protein-mediated signaling				8
chr7:46186270-46186670	IGFBP3	(-225599)	BP00102:Signal transduction; BP00274:Cell communication; BP00275:Extracellular matrix protein-mediated signaling				8
chr7:46526398-46526798	IGFBP3	(-565727)	BP00102:Signal transduction; BP00274:Cell communication; BP00275:Extracellular matrix protein-mediated signaling				8
chr7:46803503-46803903	IGFBP3	(-842832)	BP00102:Signal transduction; BP00274:Cell communication; BP00275:Extracellular matrix protein-mediated signaling				8
chr7:50657089-50657489	GRB10	(+142776)	BP00102:Signal transduction				8
chr7:50797604-50798004	GRB10	(+2261)	BP00102:Signal transduction				8
chr7:50798144-50798544	GRB10	(+1721)	BP00102:Signal transduction				8
chr7:66281238-66281638	RABGEF1	(+76455)	BP00129:Endocytosis; BP00136:Other intracellular protein traffic				8
chr7:73132462-73132862	STX1A	(+1355)					8
chr7:92263960-92264360	CDK6	(+201781)	BP00063:Protein modification; BP00064:Protein phosphorylation; BP00207:Cell cycle control; hsa05200:Pathways in cancer; hsa05214:Glioma				8
chr7:92461800-92462200	CDK6	(+3941)	BP00063:Protein modification; BP00064:Protein phosphorylation; BP00207:Cell cycle control; hsa05200:Pathways in cancer; hsa05214:Glioma				8
chr7:92464369-92464769	CDK6	(+1372)	BP00063:Protein modification; BP00064:Protein phosphorylation; BP00207:Cell cycle control; hsa05200:Pathways in cancer; hsa05214:Glioma				8
chr7:92466350-92466750	CDK6	(-609)	BP00063:Protein modification; BP00064:Protein phosphorylation; BP00207:Cell cycle control; hsa05200:Pathways in cancer; hsa05214:Glioma				8
chr7:92726516-92726916	CDK6	(-260775)	BP00063:Protein modification; BP00064:Protein phosphorylation; BP00207:Cell cycle control; hsa05200:Pathways in cancer; hsa05214:Glioma				8
chr7:92745114-92745514	CDK6	(-279373)	BP00063:Protein modification; BP00064:Protein phosphorylation; BP00207:Cell cycle control; hsa05200:Pathways in cancer; hsa05214:Glioma				8
chr7:100771565-100771965	SERPINE1	(+1386)					8
chr7:100773535-100773935	SERPINE1	(+3356)					8
chr7:100775235-100775635	SERPINE1	(+5056)					8
chr7:100782925-100783325	SERPINE1	(+12746)					8
chr7:115850918-115851318	TES	(+571)	BP00193:Developmental processes; BP00264:Tumor suppressor; BP00285:Cell structure and motility; BP00286:Cell structure; BP00287:Cell motility				8
chr7:115852303-115852703	TES	(+1956)	BP00193:Developmental processes; BP00264:Tumor suppressor; BP00285:Cell structure and motility; BP00286:Cell structure; BP00287:Cell motility				8
chr7:115862589-115862989	TES	(+12242)	BP00193:Developmental processes; BP00264:Tumor suppressor; BP00285:Cell structure and motility; BP00286:Cell structure; BP00287:Cell motility				8
chr7:115900068-115900468	TES	(+49721)	BP00193:Developmental processes; BP00264:Tumor suppressor; BP00285:Cell structure and motility; BP00286:Cell structure; BP00287:Cell motility				8
chr7:115900959-115901523	TES	(+50694)	BP00193:Developmental processes; BP00264:Tumor suppressor; BP00285:Cell structure and motility; BP00286:Cell structure; BP00287:Cell motility				8
chr7:116095060-116095460	TES	(+244713)	BP00193:Developmental processes; BP00264:Tumor suppressor; BP00285:Cell structure and motility; BP00286:Cell structure; BP00287:Cell motility				8
chr7:116144641-116145041	CAV1	(-19998)	BP00102:Signal transduction; BP00129:Endocytosis; hsa04510:Focal adhesion				8
chr7:116148891-116149291	CAV1	(-15748)	BP00102:Signal transduction; BP00129:Endocytosis; hsa04510:Focal adhesion				8
chr7:116150091-116150491	CAV1	(-14548)	BP00102:Signal transduction; BP00129:Endocytosis; hsa04510:Focal adhesion				8
chr7:116191533-116191933	CAV1	(+26894)	BP00102:Signal transduction; BP00129:Endocytosis; hsa04510:Focal adhesion				8
chr7:116216871-116217631	CAV1	(+52412)	BP00102:Signal transduction; BP00129:Endocytosis; hsa04510:Focal adhesion				8
chr7:128470772-128471172	FLNC	(+489)	BP00285:Cell structure and motility; BP00286:Cell structure; BP00287:Cell motility; hsa04510:Focal adhesion				8
chr7:128471432-128471917	FLNC	(+1192)	BP00285:Cell structure and motility; BP00286:Cell structure; BP00287:Cell motility; hsa04510:Focal adhesion				8
chr7:128476022-128476422	FLNC	(+5739)	BP00285:Cell structure and motility; BP00286:Cell structure; BP00287:Cell motility; hsa04510:Focal adhesion				8
chr7:128480942-128481342	FLNC	(+10659)	BP00285:Cell structure and motility; BP00286:Cell structure; BP00287:Cell motility; hsa04510:Focal adhesion				8
chr7:130131694-130132094	MEST	(-5)					8
chr7:130132151-130132551	MEST	(+452)					8
chr7:137223225-137223625	DGKI	(+308184)	BP00102:Signal transduction; BP00111:Intracellular signaling cascade; BP00119:Other intracellular signaling cascade; hsa04070:Phosphatidylinositol signaling system				8
chr7:137352476-137352876	DGKI	(+178933)	BP00102:Signal transduction; BP00111:Intracellular signaling cascade; BP00119:Other intracellular signaling cascade; hsa04070:Phosphatidylinositol signaling system				8
chr7:137353126-137353526	DGKI	(+178283)	BP00102:Signal transduction; BP00111:Intracellular signaling cascade; BP00119:Other intracellular signaling cascade; hsa04070:Phosphatidylinositol signaling system				8
chr7:137355046-137355446	DGKI	(+176363)	BP00102:Signal transduction; BP00111:Intracellular signaling cascade; BP00119:Other intracellular signaling cascade; hsa04070:Phosphatidylinositol signaling system				8
chr7:137367332-137367732	DGKI	(+164077)	BP00102:Signal transduction; BP00111:Intracellular signaling cascade; BP00119:Other intracellular signaling cascade; hsa04070:Phosphatidylinositol signaling system				8
chr7:137441768-137442168	DGKI	(+89641)	BP00102:Signal transduction; BP00111:Intracellular signaling cascade; BP00119:Other intracellular signaling cascade; hsa04070:Phosphatidylinositol signaling system				8
chr7:137456584-137456984	DGKI	(+74825)	BP00102:Signal transduction; BP00111:Intracellular signaling cascade; BP00119:Other intracellular signaling cascade; hsa04070:Phosphatidylinositol signaling system				8
chr7:137457604-137458004	DGKI	(+73805)	BP00102:Signal transduction; BP00111:Intracellular signaling cascade; BP00119:Other intracellular signaling cascade; hsa04070:Phosphatidylinositol signaling system				8
chr7:137474961-137475361	DGKI	(+56448)	BP00102:Signal transduction; BP00111:Intracellular signaling cascade; BP00119:Other intracellular signaling cascade; hsa04070:Phosphatidylinositol signaling system				8
chr7:137477271-137477671	DGKI	(+54138)	BP00102:Signal transduction; BP00111:Intracellular signaling cascade; BP00119:Other intracellular signaling cascade; hsa04070:Phosphatidylinositol signaling system				8
chr7:137562694-137563190	DGKI	(-31333)	BP00102:Signal transduction; BP00111:Intracellular signaling cascade; BP00119:Other intracellular signaling cascade; hsa04070:Phosphatidylinositol signaling system	CREB3L2	(+123905)	hsa04916:Melanogenesis	8
chr7:137563884-137564284	DGKI	(-32475)	BP00102:Signal transduction; BP00111:Intracellular signaling cascade; BP00119:Other intracellular signaling cascade; hsa04070:Phosphatidylinositol signaling system	CREB3L2	(+122763)	hsa04916:Melanogenesis	8
chr7:137649004-137649404	DGKI	(-117595)	BP00102:Signal transduction; BP00111:Intracellular signaling cascade; BP00119:Other intracellular signaling cascade; hsa04070:Phosphatidylinositol signaling system	CREB3L2	(+37643)	hsa04916:Melanogenesis	8
chr7:137654994-137655394	DGKI	(-123585)	BP00102:Signal transduction; BP00111:Intracellular signaling cascade; BP00119:Other intracellular signaling cascade; hsa04070:Phosphatidylinositol signaling system	CREB3L2	(+31653)	hsa04916:Melanogenesis	8
chr8:1735119-1735519	ARHGEF10	(-36830)					8
chr8:12938485-12938885	DLC1	(+433744)	BP00102:Signal transduction				8
chr8:12989255-12989655	DLC1	(+382974)	BP00102:Signal transduction				8
chr8:12989825-12990225	DLC1	(+382404)	BP00102:Signal transduction				8
chr8:13007291-13007691	DLC1	(+364938)	BP00102:Signal transduction				8
chr8:13122838-13123238	DLC1	(+249391)	BP00102:Signal transduction				8
chr8:13133107-13133507	DLC1	(+239122)	BP00102:Signal transduction				8
chr8:13210773-13211173	DLC1	(+161456)	BP00102:Signal transduction				8
chr8:18940263-18940663	SH2D4A	(-231024)					8
chr8:18940773-18941173	SH2D4A	(-230514)					8
chr8:18992030-18992461	SH2D4A	(-179241)					8
chr8:18993070-18993470	SH2D4A	(-178217)					8
chr8:18998692-18999194	SH2D4A	(-172544)					8
chr8:19029047-19029447	SH2D4A	(-142240)					8
chr8:19066880-19067280	SH2D4A	(-104407)					8
chr8:19170379-19170779	SH2D4A	(-908)					8
chr8:23149081-23149495	R3HCC1	(+3676)		LOXL2	(+112434)	BP00124:Cell adhesion; BP00264:Tumor suppressor	8
chr8:23150105-23150505	R3HCC1	(+4693)		LOXL2	(+111417)	BP00124:Cell adhesion; BP00264:Tumor suppressor	8
chr8:23201785-23202357	R3HCC1	(+56459)		LOXL2	(+59651)	BP00124:Cell adhesion; BP00264:Tumor suppressor	8
chr8:23202545-23202945	R3HCC1	(+57133)		LOXL2	(+58977)	BP00124:Cell adhesion; BP00264:Tumor suppressor	8
chr8:23225519-23225919	LOXL2	(+36003)	BP00124:Cell adhesion; BP00264:Tumor suppressor	R3HCC1	(+80107)		8
chr8:23256311-23256711	LOXL2	(+5211)	BP00124:Cell adhesion; BP00264:Tumor suppressor	R3HCC1	(+110899)		8
chr8:32098390-32098790	NRG1	(-307138)	BP00102:Signal transduction; BP00108:Receptor protein tyrosine kinase signaling pathway; BP00193:Developmental processes; BP00224:Cell proliferation and differentiation; BP00274:Cell communication				8
chr8:32404677-32405106	NRG1	(-836)	BP00102:Signal transduction; BP00108:Receptor protein tyrosine kinase signaling pathway; BP00193:Developmental processes; BP00224:Cell proliferation and differentiation; BP00274:Cell communication				8
chr8:32405137-32406097	NRG1	(-111)	BP00102:Signal transduction; BP00108:Receptor protein tyrosine kinase signaling pathway; BP00193:Developmental processes; BP00224:Cell proliferation and differentiation; BP00274:Cell communication				8
chr8:32406187-32406633	NRG1	(+682)	BP00102:Signal transduction; BP00108:Receptor protein tyrosine kinase signaling pathway; BP00193:Developmental processes; BP00224:Cell proliferation and differentiation; BP00274:Cell communication				8
chr8:32466686-32467086	NRG1	(+61158)	BP00102:Signal transduction; BP00108:Receptor protein tyrosine kinase signaling pathway; BP00193:Developmental processes; BP00224:Cell proliferation and differentiation; BP00274:Cell communication				8
chr8:32507657-32508057	NRG1	(+102129)	BP00102:Signal transduction; BP00108:Receptor protein tyrosine kinase signaling pathway; BP00193:Developmental processes; BP00224:Cell proliferation and differentiation; BP00274:Cell communication				8
chr8:32531156-32531556	NRG1	(+125628)	BP00102:Signal transduction; BP00108:Receptor protein tyrosine kinase signaling pathway; BP00193:Developmental processes; BP00224:Cell proliferation and differentiation; BP00274:Cell communication				8
chr8:32552236-32552636	NRG1	(+146708)	BP00102:Signal transduction; BP00108:Receptor protein tyrosine kinase signaling pathway; BP00193:Developmental processes; BP00224:Cell proliferation and differentiation; BP00274:Cell communication				8
chr8:32558807-32559207	NRG1	(+153279)	BP00102:Signal transduction; BP00108:Receptor protein tyrosine kinase signaling pathway; BP00193:Developmental processes; BP00224:Cell proliferation and differentiation; BP00274:Cell communication				8
chr8:32631036-32631436	NRG1	(+225508)	BP00102:Signal transduction; BP00108:Receptor protein tyrosine kinase signaling pathway; BP00193:Developmental processes; BP00224:Cell proliferation and differentiation; BP00274:Cell communication				8
chr8:93113550-93114064	RUNX1T1	(-5925)	hsa05200:Pathways in cancer				8
chr8:101801134-101801534	YWHAZ	(+163887)	BP00102:Signal transduction; hsa05130:Pathogenic Escherichia coli infection				8
chr8:101965562-101965962	YWHAZ	(-541)	BP00102:Signal transduction; hsa05130:Pathogenic Escherichia coli infection				8
chr8:102138881-102139281	YWHAZ	(-173860)	BP00102:Signal transduction; hsa05130:Pathogenic Escherichia coli infection				8
chr8:102161691-102162091	YWHAZ	(-196670)	BP00102:Signal transduction; hsa05130:Pathogenic Escherichia coli infection				8
chr8:102168077-102168477	YWHAZ	(-203056)	BP00102:Signal transduction; hsa05130:Pathogenic Escherichia coli infection				8
chr8:102201302-102201702	YWHAZ	(-236281)	BP00102:Signal transduction; hsa05130:Pathogenic Escherichia coli infection				8
chr8:145582431-145582882	GPR172A	(+381)	BP00102:Signal transduction				8
chr9:6383565-6384031	UHRF2	(-29353)	BP00224:Cell proliferation and differentiation				8
chr9:6436216-6436616	UHRF2	(+23265)	BP00224:Cell proliferation and differentiation				8
chr9:6511663-6512063	UHRF2	(+98712)	BP00224:Cell proliferation and differentiation				8
chr9:6530253-6530653	UHRF2	(+117302)	BP00224:Cell proliferation and differentiation				8
chr9:6552758-6553158	UHRF2	(+139807)	BP00224:Cell proliferation and differentiation				8
chr9:6565326-6565726	UHRF2	(+152375)	BP00224:Cell proliferation and differentiation				8
chr9:6566336-6566736	UHRF2	(+153385)	BP00224:Cell proliferation and differentiation				8
chr9:6566851-6567251	UHRF2	(+153900)	BP00224:Cell proliferation and differentiation				8
chr9:35111586-35112058	FAM214B	(+4071)					8
chr9:35112127-35112578	FAM214B	(+3540)					8
chr9:35114252-35114666	FAM214B	(+1434)					8
chr9:35518705-35519105	RUSC2	(+28898)					8
chr9:35538135-35538911	RUSC2	(+48516)					8
chr9:36040327-36040727	RECK	(+3617)					8
chr9:36074878-36075278	RECK	(+38168)					8
chr9:37913591-37913991	SHB	(+155419)					8
chr9:38002228-38002628	SHB	(+66782)					8
chr9:38067357-38067788	SHB	(+1637)					8
chr9:38068168-38068568	SHB	(+842)					8
chr9:75786926-75787364	ANXA1	(+20364)	BP00102:Signal transduction; BP00285:Cell structure and motility; BP00287:Cell motility				8
chr9:75787732-75788224	ANXA1	(+21197)	BP00102:Signal transduction; BP00285:Cell structure and motility; BP00287:Cell motility				8
chr9:100977232-100977632	TBC1D2	(+40571)					8
chr9:100985362-100985805	TBC1D2	(+32419)					8
chr9:101011173-101011621	TBC1D2	(+6606)					8
chr9:101013941-101014341	TBC1D2	(+3862)					8
chr9:101017401-101017875	TBC1D2	(+365)					8
chr9:110251573-110251973	KLF4	(+274)	BP00193:Developmental processes				8
chr9:110400254-110400700	KLF4	(-148430)	BP00193:Developmental processes				8
chr9:110401120-110401520	KLF4	(-149273)	BP00193:Developmental processes				8
chr9:124506371-124506771	DAB2IP	(+177172)					8
chr9:130710836-130711236	DPM2	(-10273)					8
chr9:130730891-130731416	DPM2	(-30391)					8
chr9:130741711-130742111	DPM2	(-41148)					8
chr9:131016453-131016853	GOLGA2	(+21615)		DNM1	(+50990)	BP00129:Endocytosis; BP00285:Cell structure and motility; BP00286:Cell structure; hsa04666:Fc gamma R-mediated phagocytosis	8
chr9:131183379-131183779	CERCAM	(+820)	BP00124:Cell adhesion				8
chr9:131313137-131313585	SPTAN1	(-1476)	hsa04530:Tight junction				8
chr9:131901507-131901969	PPP2R4	(+28510)	BP00063:Protein modification				8
chr9:131903027-131903436	PPP2R4	(+30004)	BP00063:Protein modification				8
chr9:131904307-131904707	PPP2R4	(+31279)	BP00063:Protein modification				8
chr9:131905367-131905767	PPP2R4	(+32339)	BP00063:Protein modification				8
chr9:131908167-131908567	PPP2R4	(+35139)	BP00063:Protein modification				8
chr9:139446605-139447005	NOTCH1	(-6567)	BP00102:Signal transduction; BP00120:Cell adhesion-mediated signaling; BP00193:Developmental processes; BP00224:Cell proliferation and differentiation; BP00274:Cell communication; BP00285:Cell structure and motility; BP00287:Cell motility				8
chr9:139462387-139462787	NOTCH1	(-22349)	BP00102:Signal transduction; BP00120:Cell adhesion-mediated signaling; BP00193:Developmental processes; BP00224:Cell proliferation and differentiation; BP00274:Cell communication; BP00285:Cell structure and motility; BP00287:Cell motility				8
chr9:139890674-139891270	CLIC3	(+52)					8
chr9:139892040-139892440	CLIC3	(-1216)					8
chr10:17257194-17257594	VIM	(-12864)	BP00193:Developmental processes; BP00285:Cell structure and motility; BP00286:Cell structure				8
chr10:17274065-17274645	VIM	(+4097)	BP00193:Developmental processes; BP00285:Cell structure and motility; BP00286:Cell structure				8
chr10:17278085-17278545	VIM	(+8057)	BP00193:Developmental processes; BP00285:Cell structure and motility; BP00286:Cell structure				8
chr10:17390644-17391044	VIM	(+120586)	BP00193:Developmental processes; BP00285:Cell structure and motility; BP00286:Cell structure				8
chr10:33179445-33179965	ITGB1	(+67588)	BP00102:Signal transduction; BP00120:Cell adhesion-mediated signaling; BP00124:Cell adhesion; BP00274:Cell communication; BP00275:Extracellular matrix protein-mediated signaling; BP00285:Cell structure and motility; BP00287:Cell motility; hsa04360:Axon guidance; hsa04510:Focal adhesion; hsa04514:Cell adhesion molecules (CAMs); hsa04670:Leukocyte transendothelial migration; hsa04810:Regulation of …				8
chr10:33215292-33215940	ITGB1	(+31677)	BP00102:Signal transduction; BP00120:Cell adhesion-mediated signaling; BP00124:Cell adhesion; BP00274:Cell communication; BP00275:Extracellular matrix protein-mediated signaling; BP00285:Cell structure and motility; BP00287:Cell motility; hsa04360:Axon guidance; hsa04510:Focal adhesion; hsa04514:Cell adhesion molecules (CAMs); hsa04670:Leukocyte transendothelial migration; hsa04810:Regulation of …				8
chr10:33270035-33270544	ITGB1	(-22997)	BP00102:Signal transduction; BP00120:Cell adhesion-mediated signaling; BP00124:Cell adhesion; BP00274:Cell communication; BP00275:Extracellular matrix protein-mediated signaling; BP00285:Cell structure and motility; BP00287:Cell motility; hsa04360:Axon guidance; hsa04510:Focal adhesion; hsa04514:Cell adhesion molecules (CAMs); hsa04670:Leukocyte transendothelial migration; hsa04810:Regulation of …	NRP1	(+353543)	BP00102:Signal transduction; BP00193:Developmental processes; hsa04360:Axon guidance	8
chr10:33272184-33272584	ITGB1	(-25091)	BP00102:Signal transduction; BP00120:Cell adhesion-mediated signaling; BP00124:Cell adhesion; BP00274:Cell communication; BP00275:Extracellular matrix protein-mediated signaling; BP00285:Cell structure and motility; BP00287:Cell motility; hsa04360:Axon guidance; hsa04510:Focal adhesion; hsa04514:Cell adhesion molecules (CAMs); hsa04670:Leukocyte transendothelial migration; hsa04810:Regulation of …	NRP1	(+351449)	BP00102:Signal transduction; BP00193:Developmental processes; hsa04360:Axon guidance	8
chr10:33463494-33463894	ITGB1	(-216401)	BP00102:Signal transduction; BP00120:Cell adhesion-mediated signaling; BP00124:Cell adhesion; BP00274:Cell communication; BP00275:Extracellular matrix protein-mediated signaling; BP00285:Cell structure and motility; BP00287:Cell motility; hsa04360:Axon guidance; hsa04510:Focal adhesion; hsa04514:Cell adhesion molecules (CAMs); hsa04670:Leukocyte transendothelial migration; hsa04810:Regulation of …	NRP1	(+160139)	BP00102:Signal transduction; BP00193:Developmental processes; hsa04360:Axon guidance	8
chr10:33568524-33568924	ITGB1	(-321431)	BP00102:Signal transduction; BP00120:Cell adhesion-mediated signaling; BP00124:Cell adhesion; BP00274:Cell communication; BP00275:Extracellular matrix protein-mediated signaling; BP00285:Cell structure and motility; BP00287:Cell motility; hsa04360:Axon guidance; hsa04510:Focal adhesion; hsa04514:Cell adhesion molecules (CAMs); hsa04670:Leukocyte transendothelial migration; hsa04810:Regulation of …	NRP1	(+55109)	BP00102:Signal transduction; BP00193:Developmental processes; hsa04360:Axon guidance	8
chr10:35924411-35924811	FZD8	(+5751)	hsa04916:Melanogenesis; hsa05200:Pathways in cancer				8
chr10:36638481-36638881	FZD8	(-708319)	hsa04916:Melanogenesis; hsa05200:Pathways in cancer				8
chr10:36778649-36779049	FZD8	(-848487)	hsa04916:Melanogenesis; hsa05200:Pathways in cancer				8
chr10:36779359-36779759	FZD8	(-849197)	hsa04916:Melanogenesis; hsa05200:Pathways in cancer				8
chr10:36783299-36783699	FZD8	(-853137)	hsa04916:Melanogenesis; hsa05200:Pathways in cancer				8
chr10:44385660-44386330	CXCL12	(+494550)	hsa04360:Axon guidance; hsa04670:Leukocyte transendothelial migration				8
chr10:44387410-44387810	CXCL12	(+492935)	hsa04360:Axon guidance; hsa04670:Leukocyte transendothelial migration				8
chr10:44864497-44864897	CXCL12	(+15848)	hsa04360:Axon guidance; hsa04670:Leukocyte transendothelial migration				8
chr10:44880025-44880425	CXCL12	(+320)	hsa04360:Axon guidance; hsa04670:Leukocyte transendothelial migration				8
chr10:45065125-45065599	CXCL12	(-184817)	hsa04360:Axon guidance; hsa04670:Leukocyte transendothelial migration				8
chr10:45357398-45357798	CXCL12	(-477053)	hsa04360:Axon guidance; hsa04670:Leukocyte transendothelial migration				8
chr10:45359468-45359868	CXCL12	(-479123)	hsa04360:Axon guidance; hsa04670:Leukocyte transendothelial migration				8
chr10:45359904-45360498	CXCL12	(-479656)	hsa04360:Axon guidance; hsa04670:Leukocyte transendothelial migration				8
chr10:49705256-49705656	ARHGAP22	(+107682)					8
chr10:49797479-49797926	ARHGAP22	(+15435)					8
chr10:49815189-49815589	ARHGAP22	(-2251)					8
chr10:49863437-49863911	ARHGAP22	(-50536)					8
chr10:50656722-50657122	ERCC6	(+90225)					8
chr10:50693032-50693432	ERCC6	(+53915)					8
chr10:50743012-50743472	ERCC6	(+3905)					8
chr10:50746042-50746832	ERCC6	(+710)					8
chr10:50747452-50747934	ERCC6	(-546)					8
chr10:50757998-50758703	ERCC6	(-11204)					8
chr10:75666615-75667036	PLAU	(-4036)	BP00102:Signal transduction; BP00274:Cell communication; BP00285:Cell structure and motility; BP00287:Cell motility				8
chr10:75671098-75671765	PLAU	(+570)	BP00102:Signal transduction; BP00274:Cell communication; BP00285:Cell structure and motility; BP00287:Cell motility				8
chr10:75672878-75673278	PLAU	(+2216)	BP00102:Signal transduction; BP00274:Cell communication; BP00285:Cell structure and motility; BP00287:Cell motility				8
chr10:75677355-75677755	PLAU	(+6693)	BP00102:Signal transduction; BP00274:Cell communication; BP00285:Cell structure and motility; BP00287:Cell motility				8
chr10:75725621-75726142	PLAU	(+55020)	BP00102:Signal transduction; BP00274:Cell communication; BP00285:Cell structure and motility; BP00287:Cell motility				8
chr10:78923660-78924149	KCNMA1	(+473672)	BP00173:Muscle contraction				8
chr10:79050090-79050490	KCNMA1	(+347287)	BP00173:Muscle contraction				8
chr10:79050510-79051100	KCNMA1	(+346772)	BP00173:Muscle contraction				8
chr10:79110450-79110960	KCNMA1	(+286872)	BP00173:Muscle contraction				8
chr10:79111020-79111460	KCNMA1	(+286337)	BP00173:Muscle contraction				8
chr10:79115780-79116180	KCNMA1	(+281597)	BP00173:Muscle contraction				8
chr10:79117460-79117860	KCNMA1	(+279917)	BP00173:Muscle contraction				8
chr10:79150960-79151360	KCNMA1	(+246417)	BP00173:Muscle contraction				8
chr10:79151470-79151870	KCNMA1	(+245907)	BP00173:Muscle contraction				8
chr10:79152510-79152910	KCNMA1	(+244867)	BP00173:Muscle contraction				8
chr10:79177460-79177860	KCNMA1	(+219917)	BP00173:Muscle contraction				8
chr10:79178040-79178440	KCNMA1	(+219337)	BP00173:Muscle contraction				8
chr10:79178830-79179230	KCNMA1	(+218547)	BP00173:Muscle contraction				8
chr10:79225670-79226070	KCNMA1	(+171707)	BP00173:Muscle contraction				8
chr10:79228590-79228990	KCNMA1	(+168787)	BP00173:Muscle contraction				8
chr10:79261210-79261610	KCNMA1	(+136167)	BP00173:Muscle contraction				8
chr10:79265170-79265920	KCNMA1	(+132032)	BP00173:Muscle contraction				8
chr10:79324650-79325050	KCNMA1	(+72727)	BP00173:Muscle contraction				8
chr10:79352070-79352470	KCNMA1	(+45307)	BP00173:Muscle contraction				8
chr10:79365370-79365770	KCNMA1	(+32007)	BP00173:Muscle contraction				8
chr10:79396600-79397000	KCNMA1	(+777)	BP00173:Muscle contraction				8
[truncated: 3,054 more rows]

## Sheet: by Gene
Gene Lists Associated with Gene Ontology Analysis, Related to Figure 1
RNAPII Enhancers were mapped to nearby genes using GREAT (McLean et al., 2010). RNAPII occupancy was scored for each gene as a function of cell density and DMI treatment and genes showing correlated changes between an RNAPII enhancer and the entire gene locus were submitted to DAVID (Dennis et al., 2003) for Gene Ontology (GO) analysis (Panther and KEGG Pathways). Spreadsheets list enhancers mapp…
Gene Symbol	Enhancers	Clusters	GO Terms
ABCA1	chr9:107753588-107754134	14
ABCC2	chr10:101519891-101520576,chr10:101528341-101528741,chr10:101535704-101536104,chr10:101536294-101536694,chr10:101569984-101570384,chr10:101603004-101603552,chr10:101605373-101605794	15	BP00148:Immunity and defense
ABCC3	chr17:48712114-48712538,chr17:48723234-48723634,chr17:48737978-48738378,chr17:48738598-48738998,chr17:48758718-48759488,chr17:48764128-48764528	13	BP00146:Extracellular transport and import
ABCC6	chr16:16195993-16196393	13	BP00146:Extracellular transport and import
ABHD2	chr15:89746819-89747219,chr15:89747649-89748049,chr15:89748099-89748499	4
ABI3BP	chr3:100530988-100531388,chr3:100708638-100709038,chr3:100710578-100710978,chr3:100755523-100755923,chr3:100784685-100785085	10
ABL1	chr9:133710291-133710691,chr9:133717965-133718365,chr9:133719185-133719585,chr9:133721900-133722300	6	BP00203:Cell cycle; BP00207:Cell cycle control; hsa04110:Cell cycle; hsa04722:Neurotrophin signaling pathway; hsa05200:Pathways in cancer
ABL2	chr1:179055920-179056320,chr1:179056859-179057259	4	BP00063:Protein modification; BP00203:Cell cycle; BP00207:Cell cycle control; BP00285:Cell structure and motility; BP00287:Cell motility
ABR	chr17:1013267-1013667,chr17:1014555-1014967	4
ACACB	chr12:109536475-109536875,chr12:109592070-109592784,chr12:109592894-109593294,chr12:109616814-109617214	15	BP00001:Carbohydrate metabolism; BP00019:Lipid, fatty acid and steroid metabolism; BP00020:Fatty acid metabolism; hsa00620:Pyruvate metabolism; hsa04910:Insulin signaling pathway; hsa04920:Adipocytokine signaling pathway
ACAN	chr15:89248289-89248689	1
ACAP3	chr1:1240056-1240456	1
ACOT12	chr5:80932066-80932466,chr5:81012873-81013273,chr5:81014253-81014653	15	BP00019:Lipid, fatty acid and steroid metabolism; BP00020:Fatty acid metabolism; hsa00620:Pyruvate metabolism
ACPT	chr19:51298070-51298470,chr19:51298850-51299250	1
ACRC	chrX:70783644-70784044,chrX:70806914-70807314,chrX:70836773-70837173	10,9
ACSL1	chr4:185664333-185664733,chr4:185667483-185667883,chr4:185672243-185672643,chr4:185677409-185677833,chr4:185729843-185730243,chr4:185746113-185746513	15	BP00019:Lipid, fatty acid and steroid metabolism; BP00020:Fatty acid metabolism; hsa03320:PPAR signaling pathway; hsa04920:Adipocytokine signaling pathway
ACSL3	chr2:223775277-223775677,chr2:223796407-223796807,chr2:223812409-223812809,chr2:223814227-223814627	13	hsa03320:PPAR signaling pathway
ACSL6	chr5:131029455-131029855	15	BP00019:Lipid, fatty acid and steroid metabolism; BP00020:Fatty acid metabolism; hsa03320:PPAR signaling pathway; hsa04920:Adipocytokine signaling pathway
ACTA2	chr10:90728417-90728817	9	BP00285:Cell structure and motility; BP00286:Cell structure; hsa04270:Vascular smooth muscle contraction
ACTC1	chr15:35087606-35088006,chr15:35102862-35103262	1
ACTG1	chr17:79474417-79474817	8	BP00129:Endocytosis; BP00285:Cell structure and motility; BP00286:Cell structure; hsa04510:Focal adhesion; hsa04530:Tight junction; hsa04670:Leukocyte transendothelial migration; hsa04810:Regulation of actin cytoskeleton; hsa05130:Pathogenic Escherichia coli infection; hsa05412:Arrhythmogenic right ventricular cardiomyopathy (ARVC); hsa05414:Dilated cardiomyopathy
ACTN4	chr19:39149066-39149636,chr19:39174520-39175256	4	BP00285:Cell structure and motility; BP00286:Cell structure; hsa04510:Focal adhesion; hsa04810:Regulation of actin cytoskeleton; hsa05322:Systemic lupus erythematosus
ACTR1B	chr2:98279388-98280011	4	BP00203:Cell cycle; BP00282:Mitosis; BP00285:Cell structure and motility; BP00286:Cell structure
ADAM12	chr10:127911210-127911610,chr10:127911805-127912205,chr10:127916419-127917143,chr10:127932263-127932663,chr10:127932669-127933083,chr10:127933279-127933909,chr10:127935805-127936205,chr10:128029839-128030239,chr10:128074807-128075447,chr10:128076087-128076537	8	BP00102:Signal transduction; BP00120:Cell adhesion-mediated signaling; BP00124:Cell adhesion; BP00224:Cell proliferation and differentiation; BP00274:Cell communication
ADAM19	chr5:157002559-157002959	8	BP00102:Signal transduction; BP00120:Cell adhesion-mediated signaling; BP00193:Developmental processes; BP00274:Cell communication
ADAMTS1	chr21:28211182-28211642,chr21:28212262-28212862,chr21:28213262-28213662,chr21:28213952-28214352,chr21:28214402-28214802	1
ADAMTS10	chr19:8654820-8655220,chr19:8657209-8657620,chr19:8675180-8675662	10	BP00102:Signal transduction; BP00274:Cell communication
ADAMTS12	chr5:33891910-33892465	4
ADAMTS15	chr11:130318289-130318781,chr11:130348138-130348538	15	BP00102:Signal transduction
ADAMTS2	chr5:178507687-178508391,chr5:178511561-178512047,chr5:178575472-178575872,chr5:178617725-178618125,chr5:178769806-178770306,chr5:178771136-178771715,chr5:178805578-178805978	14	BP00102:Signal transduction; BP00274:Cell communication
ADAMTS5	chr21:28299810-28300210,chr21:28305470-28305870,chr21:28335960-28336360,chr21:28336634-28337075,chr21:28338260-28338775,chr21:28954993-28955514,chr21:28959304-28959704,chr21:28962603-28963003,chr21:29065788-29066188	8	BP00102:Signal transduction; BP00120:Cell adhesion-mediated signaling; BP00274:Cell communication
ADAMTS6	chr5:64458525-64458925,chr5:64486443-64487113,chr5:64494023-64494713,chr5:64494783-64495203,chr5:64495343-64495763,chr5:64495803-64496203,chr5:64500243-64500643,chr5:64505073-64505580,chr5:64557933-64558333,chr5:64558393-64558793,chr5:64587000-64587400	8	BP00102:Signal transduction; BP00120:Cell adhesion-mediated signaling; BP00274:Cell communication
ADAMTS9	chr3:64671508-64671908,chr3:64673708-64674126	13	BP00102:Signal transduction
ADAMTSL1	chr9:18674840-18675240,chr9:18861926-18862326	4
ADAMTSL5	chr19:1507792-1508247	9
ADARB1	chr21:46378884-46379284,chr21:46379564-46379964,chr21:46461445-46461845,chr21:46475890-46476290,chr21:46496065-46496465,chr21:46570715-46571115,chr21:46583385-46583785,chr21:46584295-46584695,chr21:46645875-46646275,chr21:46646825-46647255,chr21:46647555-46648125,chr21:46648595-46648995	14
ADCY4	chr14:24798126-24798526,chr14:24798956-24799468,chr14:24802818-24803426,chr14:24803988-24804437	3	hsa04114:Oocyte meiosis; hsa04914:Progesterone-mediated oocyte maturation
ADCY7	chr16:50187938-50188338,chr16:50279356-50279794,chr16:50285454-50285854	8	hsa04020:Calcium signaling pathway; hsa04916:Melanogenesis; hsa05414:Dilated cardiomyopathy
ADM	chr11:10326453-10326892,chr11:10328257-10328657,chr11:10328937-10329337,chr11:10329422-10329933	14	BP00193:Developmental processes
ADM2	chr22:50919759-50920169,chr22:50920189-50920611	10
ADPRHL2	chr1:36558915-36559315,chr1:36559695-36560095	8	BP00063:Protein modification
ADRA1D	chr20:4202469-4202869	15	BP00102:Signal transduction; BP00103:Cell surface receptor mediated signal transduction; BP00179:Apoptosis; BP00285:Cell structure and motility
ADRBK1	chr11:67008294-67008721,chr11:67044924-67045324	4	BP00063:Protein modification
AEBP1	chr7:44127075-44127475,chr7:44143825-44144225,chr7:44144269-44145249,chr7:44152451-44152875	8
AFAP1	chr4:7753180-7753580,chr4:7755302-7755702,chr4:7756372-7756772,chr4:7756972-7757752,chr4:7788450-7788850,chr4:7844092-7844892,chr4:7845242-7845642,chr4:7872722-7873122,chr4:7888570-7888970,chr4:7892662-7893062	8
AGAP11	chr10:88728028-88728468,chr10:88730378-88730848	8	BP00102:Signal transduction; BP00124:Cell adhesion; BP00285:Cell structure and motility
AGFG2	chr7:100142489-100142898,chr7:100167162-100167562	13	BP00102:Signal transduction; BP00103:Cell surface receptor mediated signal transduction; BP00285:Cell structure and motility
AGRN	chr1:954745-955205	9	BP00275:Extracellular matrix protein-mediated signaling; hsa04512:ECM-receptor interaction
AHNAK	chr11:62207692-62208155,chr11:62211175-62211575	4
AHNAK2	chr14:105401525-105401925,chr14:105436521-105437361,chr14:105439921-105440321	8
AHR	chr7:17827544-17827944	9
AJUBA	chr14:23450769-23451275	4
AKAP12	chr6:151645122-151645522	15
AKNA	chr9:117099252-117099652,chr9:117111435-117111835,chr9:117118182-117118582,chr9:117145769-117146195,chr9:117147699-117148099,chr9:117148965-117149365,chr9:117149405-117149822	12,15
AKR1B1	chr7:134124586-134125120,chr7:134133439-134133839,chr7:134143230-134143630	15	BP00289:Other metabolism; hsa00620:Pyruvate metabolism
AKR1B15	chr7:134250277-134250677	15	BP00289:Other metabolism
AKR1C2	chr10:4986017-4986417,chr10:5027245-5027645,chr10:5030695-5031095,chr10:5040885-5041285,chr10:5043175-5043575,chr10:5044375-5044775	13	hsa00140:Steroid hormone biosynthesis; hsa00980:Metabolism of xenobiotics by cytochrome P450
AKR1C3	chr10:5075657-5076057,chr10:5112976-5113376,chr10:5113496-5113960,chr10:5136405-5136858,chr10:5136864-5137415,chr10:5137885-5138374,chr10:5145375-5145775,chr10:5148255-5148655,chr10:5150175-5150575,chr10:5151285-5151685	13,15	BP00289:Other metabolism; hsa00140:Steroid hormone biosynthesis; hsa00980:Metabolism of xenobiotics by cytochrome P450
AKT3	chr1:243661266-243661666,chr1:243962147-243962568,chr1:244012723-244013123,chr1:244014191-244014591	8	BP00063:Protein modification; BP00064:Protein phosphorylation; BP00193:Developmental processes; BP00207:Cell cycle control; BP00224:Cell proliferation and differentiation; hsa04510:Focal adhesion; hsa04530:Tight junction; hsa04666:Fc gamma R-mediated phagocytosis; hsa05200:Pathways in cancer; hsa05214:Glioma
ALDH1A3	chr15:101431640-101432040	10
ALDH1L2	chr12:105407522-105407942,chr12:105410532-105410968,chr12:105411342-105411742,chr12:105477328-105477792	10
ALDH3A2	chr17:19558199-19558599	15	BP00289:Other metabolism; hsa00620:Pyruvate metabolism
ALDH3B1	chr11:67780500-67780900	6
ALOX15B	chr17:7916229-7916629,chr17:7920029-7920429,chr17:7942232-7942639,chr17:7944379-7944779,chr17:7959552-7959952	15	BP00019:Lipid, fatty acid and steroid metabolism; BP00148:Immunity and defense
AMIGO2	chr12:47468660-47469060,chr12:47469150-47469550,chr12:47471320-47471720,chr12:47472610-47473010,chr12:47473127-47473630,chr12:47473977-47474880	8	BP00102:Signal transduction; BP00193:Developmental processes
ANGPT1	chr8:108208510-108208910,chr8:108235329-108235729,chr8:108237314-108238394,chr8:108276194-108276594,chr8:108285117-108285517,chr8:108297937-108298337,chr8:108344841-108345241,chr8:108377037-108377437,chr8:108433534-108433934,chr8:108456190-108456590,chr8:108467847-108468247,chr8:108468397-108468800,chr8:108494905-108495305,chr8:108507660-108508060,chr8:108508175-108508575,chr8:108509436-108509900…	13	BP00102:Signal transduction; BP00103:Cell surface receptor mediated signal transduction; BP00108:Receptor protein tyrosine kinase signaling pathway; BP00193:Developmental processes; BP00248:Mesoderm development
ANGPTL2	chr9:129848437-129848837,chr9:129856257-129856777	15
ANGPTL4	chr19:8428880-8429700	13	hsa03320:PPAR signaling pathway
ANKH	chr5:14701206-14701606,chr5:14786288-14786688,chr5:14856716-14857116,chr5:14900851-14901251,chr5:14925409-14925809,chr5:14926049-14926449,chr5:15007849-15008249,chr5:15008549-15009173,chr5:15021566-15021966	8
ANKRD1	chr10:92671008-92671408,chr10:92672598-92673158,chr10:92675308-92675708,chr10:92676218-92676618	4
ANKRD11	chr16:89392518-89392918	8
ANLN	chr7:36429331-36430191	3
ANP32B	chr9:100781274-100781674	4
ANPEP	chr15:90326797-90327257,chr15:90327291-90327691,chr15:90355538-90355951	13	hsa00480:Glutathione metabolism
ANTXR1	chr2:69481042-69481442	6
ANXA1	chr9:75786926-75787364,chr9:75787732-75788224	8	BP00102:Signal transduction; BP00285:Cell structure and motility; BP00287:Cell motility
ANXA11	chr10:81904364-81904764,chr10:81954294-81954694,chr10:81966940-81967444	4,8
ANXA2	chr9:33523934-33524334	1
ANXA6	chr5:150473652-150474052,chr5:150474102-150474502,chr5:150478369-150478769,chr5:150531439-150531839	6
AOC2	chr17:40996480-40996880	15	BP00148:Immunity and defense
AOX1	chr2:201450525-201451057,chr2:201452767-201453167,chr2:201480827-201481227,chr2:201482487-201482887,chr2:201520455-201520955,chr2:201521475-201521875,chr2:201541345-201541843,chr2:201552600-201553000,chr2:201554420-201554820,chr2:201559740-201560140	13	hsa00760:Nicotinate and nicotinamide metabolism
AP2M1	chr3:183894876-183895276	9
AP3D1	chr19:2151376-2151789,chr19:2151856-2152256	4	hsa04142:Lysosome
AP3M2	chr8:42037318-42037718	9
APCDD1	chr18:10009811-10010251	15
APCDD1L	chr20:57099739-57100139,chr20:57117092-57117612	9
APEX2	chrX:55035107-55035507	9
APOL2	chr22:36635056-36635756	15
APOL3	chr22:36552684-36553084	15	BP00019:Lipid, fatty acid and steroid metabolism
APOL6	chr22:36034440-36034968,chr22:36044699-36045245	10
APOLD1	chr12:12879602-12880013	1
ARHGAP17	chr16:24950572-24950972,chr16:25000008-25000408,chr16:25060207-25060616,chr16:25117764-25118164	4	BP00285:Cell structure and motility; BP00286:Cell structure
ARHGAP22	chr10:49646909-49647309,chr10:49647689-49648089,chr10:49648609-49649149,chr10:49650679-49651079,chr10:49705256-49705656,chr10:49797479-49797926,chr10:49812926-49813416,chr10:49815189-49815589,chr10:49863437-49863911,chr10:49863967-49864411	4,8
ARHGAP23	chr17:36585195-36585617,chr17:36610637-36611037,chr17:36665735-36666135,chr17:36667095-36667495	4
ARHGAP24	chr4:86602440-86602840,chr4:86699774-86700219,chr4:86700389-86700794,chr4:86728675-86729075,chr4:86743573-86743973,chr4:86881978-86882378	10
ARHGAP6	chrX:11445942-11446342	15	BP00102:Signal transduction
ARHGEF10	chr8:1735119-1735519	8
ARHGEF10L	chr1:17880737-17881137,chr1:17914788-17915188,chr1:17944685-17945143	4,8
ARHGEF16	chr1:3229382-3229782,chr1:3392697-3393097,chr1:3395427-3395827,chr1:3396227-3397347,chr1:3397697-3398877,chr1:3398987-3399387,chr1:3401687-3402087,chr1:3418360-3418858,chr1:3420728-3421230,chr1:3446747-3447267,chr1:3447758-3448177	8
ARHGEF17	chr11:73035879-73036279	4
ARHGEF19	chr1:16529480-16529880,chr1:16533064-16533911,chr1:16543669-16544399	15
ARHGEF2	chr1:155951253-155951653,chr1:155952886-155953503	10	BP00013:Amino acid metabolism; BP00016:Amino acid transport; BP00102:Signal transduction; BP00124:Cell adhesion
ARID1A	chr1:27071271-27071671,chr1:27097686-27098086,chr1:27097971-27098392	1,6	BP00031:Nucleoside, nucleotide and nucleic acid metabolism
ARID5B	chr10:63662269-63663019,chr10:63751873-63752273,chr10:63810624-63811084	14
ARL4C	chr2:235286786-235287186	11
ARL6IP1	chr16:18812117-18812517	6
ARMC9	chr2:232026391-232026791,chr2:232125323-232125723,chr2:232191513-232191913,chr2:232244453-232244853	8
ARMCX2	chrX:100909853-100910253,chrX:100913214-100913614	9
ARNT2	chr15:80696434-80696836,chr15:80747313-80747713,chr15:80772262-80772662,chr15:80823623-80824023,chr15:80842045-80842445,chr15:80842327-80842815	4,8	hsa05200:Pathways in cancer; hsa05211:Renal cell carcinoma
ARPC5	chr1:183569416-183569816,chr1:183603682-183604082	9	BP00285:Cell structure and motility; BP00287:Cell motility; hsa04810:Regulation of actin cytoskeleton
ARSJ	chr4:114880383-114880886,chr4:114883936-114884336,chr4:115285825-115286225	4,8
ARVCF	chr22:19973977-19974377,chr22:20009628-20010028	8	BP00102:Signal transduction; BP00124:Cell adhesion; BP00274:Cell communication
ASAP2	chr2:9252074-9252474,chr2:9353608-9354088,chr2:9374978-9375378,chr2:9389158-9390048,chr2:9423818-9424218,chr2:9428398-9428938,chr2:9450578-9450978,chr2:9451008-9451408,chr2:9451558-9452088	8	BP00102:Signal transduction; BP00124:Cell adhesion; BP00285:Cell structure and motility; hsa04666:Fc gamma R-mediated phagocytosis
ASB13	chr10:5708244-5708644	15
ASNS	chr7:97479101-97479501	10	BP00013:Amino acid metabolism; BP00014:Amino acid biosynthesis; hsa00250:Alanine, aspartate and glutamate metabolism
ASXL1	chr20:31037248-31037648	4
ATOH8	chr2:85936082-85936482,chr2:86065669-86066069,chr2:86113861-86114265	15
ATP10A	chr15:25913823-25914223,chr15:25915083-25915623,chr15:25954323-25954723,chr15:26045933-26046333	9
ATP13A2	chr1:17337169-17337569	8	BP00291:Calcium ion homeostasis
ATP13A3	chr3:194206720-194207120,chr3:194247875-194248275,chr3:194295380-194296080	8	BP00291:Calcium ion homeostasis
ATP1B3	chr3:141619229-141619629,chr3:141648209-141648609	15
ATP2B3	chrX:152761674-152762074,chrX:152774934-152776614,chrX:152777009-152777409	8	BP00291:Calcium ion homeostasis; hsa04020:Calcium signaling pathway
ATP2B4	chr1:203481822-203482222,chr1:203524930-203525330,chr1:203525360-203525760,chr1:203525430-203525830	4,8	BP00291:Calcium ion homeostasis; hsa04020:Calcium signaling pathway
ATP6V0E2	chr7:149570648-149571385	4
ATP8B1	chr18:55470320-55470802	4
ATP8B2	chr1:154297276-154297749,chr1:154298534-154299022,chr1:154316272-154316672,chr1:154322919-154323319,chr1:154324669-154325069	8
ATP8B4	chr15:50169988-50170388,chr15:50428419-50428819	14
ATXN1	chr6:16332924-16333324,chr6:16339160-16339560,chr6:16683933-16684333,chr6:16713123-16713523,chr6:16741373-16741843,chr6:16741733-16742133,chr6:16752683-16753083,chr6:16760753-16761813,chr6:16762013-16762513,chr6:16762833-16763233,chr6:16849836-16850236	8,9
AURKA	chr20:54942785-54943185,chr20:54943460-54943860	3	BP00203:Cell cycle; hsa04114:Oocyte meiosis
AXIN2	chr17:63523451-63523851,chr17:63523980-63524381,chr17:63557005-63557405	13	BP00193:Developmental processes; hsa04310:Wnt signaling pathway; hsa05213:Endometrial cancer
B3GALT2	chr1:193239411-193239811	4	BP00063:Protein modification; BP00067:Protein glycosylation
B4GALT2	chr1:44441549-44441949,chr1:44445276-44445799	8	BP00063:Protein modification
B4GALT5	chr20:48246626-48247026,chr20:48248676-48249076,chr20:48266316-48266716	14
BACH1	chr21:30520824-30521224,chr21:30554276-30554696,chr21:30672144-30672598,chr21:30674964-30675364	8
BAIAP2	chr17:78976269-78976669,chr17:79070987-79071657	4	hsa04810:Regulation of actin cytoskeleton
BAZ2A	chr12:56916433-56916833,chr12:56998633-56999033	4	BP00273:Chromatin packaging and remodeling
BCAP29	chr7:107220591-107220991	4
BCAR1	chr16:75286868-75287268	8	BP00124:Cell adhesion; BP00224:Cell proliferation and differentiation; BP00285:Cell structure and motility; hsa04510:Focal adhesion; hsa04670:Leukocyte transendothelial migration; hsa04810:Regulation of actin cytoskeleton
BCAR3	chr1:94023482-94023882,chr1:94125454-94125854,chr1:94145675-94146075	1
BCAT1	chr12:25089764-25090164,chr12:25090304-25090724,chr12:25099916-25100316	8
BCL2L11	chr2:111878015-111878745,chr2:111879345-111880388,chr2:111880525-111880968,chr2:111884955-111885355,chr2:111889715-111890115,chr2:111915475-111915875,chr2:111925085-111925485	15	BP00179:Apoptosis
BCL3	chr19:45240784-45241233,chr19:45241324-45241724	13
BCL6	chr3:187437346-187438676,chr3:187455109-187455949,chr3:187456149-187456549,chr3:187457434-187458209,chr3:187458619-187459019,chr3:187459269-187459669,chr3:187459894-187460315,chr3:187462486-187462925	15
BDKRB1	chr14:96722364-96722764,chr14:96830231-96830631	4	hsa04810:Regulation of actin cytoskeleton
BDNF	chr11:27670585-27670985,chr11:27671835-27672471,chr11:27720289-27721756,chr11:27722024-27722424,chr11:27722866-27723266	1,3	hsa04010:MAPK signaling pathway
BEST1	chr11:61722423-61722883,chr11:61722473-61722873,chr11:61723113-61723513,chr11:61728936-61729533,chr11:61729744-61730144,chr11:61730406-61730983	13,15
BGN	chrX:152742335-152742735,chrX:152760299-152760714	8	BP00102:Signal transduction; BP00120:Cell adhesion-mediated signaling; BP00193:Developmental processes; BP00274:Cell communication
BHLHE40	chr3:5021867-5022375,chr3:5023089-5023669,chr3:5024839-5025239,chr3:5025649-5026049,chr3:5027595-5028027,chr3:5028372-5028795,chr3:5067520-5067920	10	BP00193:Developmental processes
BICC1	chr10:60271514-60271925,chr10:60322580-60322980,chr10:60326450-60326850,chr10:60336760-60337240,chr10:60359793-60360193,chr10:60398224-60398624,chr10:60421064-60421464,chr10:60556016-60556416,chr10:60591923-60592323,chr10:60593543-60593943,chr10:60596973-60597589	14	BP00193:Developmental processes
BIRC2	chr11:102218117-102218517,chr11:102218668-102219157,chr11:102225157-102225557,chr11:102231817-102232217,chr11:102276887-102277287	1
BLCAP	chr20:36154667-36155140,chr20:36155402-36155820	4
BLID	chr11:122029728-122030128,chr11:122073675-122074075	4
BLOC1S2	chr10:102045359-102045759	8
BLVRB	chr19:40970340-40970740	8
BMP1	chr8:22024876-22025319	10	BP00102:Signal transduction; BP00122:Ligand-mediated signaling; BP00193:Developmental processes; BP00201:Skeletal development; BP00248:Mesoderm development; BP00274:Cell communication
BMPER	chr7:33914277-33914677,chr7:33943974-33944574,chr7:33950271-33950671,chr7:33957971-33958371,chr7:33961021-33961421,chr7:33972321-33972721,chr7:34135808-34136208,chr7:34175740-34176140	15
BNC1	chr15:83956171-83956612	4
BNIP3L	chr8:26241434-26241924,chr8:26252624-26253024,chr8:26279616-26280016,chr8:26279828-26280228	13,14
BPGM	chr7:134303527-134303988,chr7:134304278-134304678	10
BRCA1	chr17:41277139-41277543	1
BRD8	chr5:137513525-137514059	4
BRD9	chr5:875815-876215,chr5:892845-893285	1
BRF2	chr8:37655595-37655995,chr8:37700835-37701235,chr8:37701425-37701825	9
BRI3	chr7:97929791-97930331	4
BRIP1	chr17:59940577-59941311	1
BRSK2	chr11:1468293-1468693,chr11:1474943-1475437,chr11:1475703-1476103,chr11:1479867-1480267	13	BP00064:Protein phosphorylation
BST1	chr4:15692071-15692601,chr4:15692864-15693534,chr4:15697121-15697521,chr4:15704535-15704935	4
BTBD11	chr12:107712004-107712452,chr12:107713772-107714172	13
BTG1	chr12:91616971-91617371,chr12:92535361-92536097,chr12:92538034-92538434,chr12:92539807-92540251	15	BP00102:Signal transduction
BTG2	chr1:203275481-203276098,chr1:203291836-203292236	13	BP00102:Signal transduction; BP00111:Intracellular signaling cascade; BP00114:MAPKKK cascade; BP00207:Cell cycle control
BUB1	chr2:111436114-111436662	1	hsa04110:Cell cycle
BUB3	chr10:124914027-124914466,chr10:124925706-124926106	1	hsa04110:Cell cycle
C10orf10	chr10:45473958-45474411,chr10:45476678-45477078	15
C10orf26	chr10:104504377-104504898,chr10:104505285-104505685,chr10:104535167-104535567,chr10:104536260-104536660,chr10:104542699-104543287	13
C10orf54	chr10:73508795-73509195,chr10:73530520-73530920,chr10:73532018-73532418	6
C11orf24	chr11:68038563-68039041	8
C14orf102	chr14:90747651-90748051	4
C15orf23	chr15:40674999-40675789,chr15:40683469-40683869	6
C17orf76-AS1	chr17:16321741-16322141	1
C17orf79	chr17:30001201-30001601,chr17:30185665-30186065	1
C19orf10	chr19:4654696-4655287	4
C1QTNF1	chr17:77022820-77023220,chr17:77023380-77023780,chr17:77024300-77024700,chr17:77028220-77028620,chr17:77029950-77030350	15	BP00148:Immunity and defense; BP00153:Complement-mediated immunity
C1QTNF5	chr11:119211390-119211790	8
C1R	chr12:7244834-7245258	15	BP00148:Immunity and defense; BP00153:Complement-mediated immunity; hsa04610:Complement and coagulation cascades
C1S	chr12:7175145-7175545	15	BP00148:Immunity and defense; BP00153:Complement-mediated immunity; hsa04610:Complement and coagulation cascades
C21orf63	chr21:33784761-33785290	13
C3orf52	chr3:111805119-111805519	4
C5orf62	chr5:150153686-150154086,chr5:150158740-150159140,chr5:150159582-150160040,chr5:150160460-150160860,chr5:150161152-150161600,chr5:150161920-150162320,chr5:150162660-150163060,chr5:150163170-150163570,chr5:150168846-150169246,chr5:150169826-150170226,chr5:150178020-150178420,chr5:150180562-150181202	13
C6orf1	chr6:34212062-34212462,chr6:34214465-34214865	4
C6orf125	chr6:33668270-33668670,chr6:33671960-33672360,chr6:33673930-33674530	8
C7orf58	chr7:120722987-120723387,chr7:120724977-120725377	4
C7orf63	chr7:89875676-89876076	14
C7orf69	chr7:47674834-47675234,chr7:47688051-47688451	10
C9	chr5:39365469-39366407,chr5:39368312-39368712,chr5:39400842-39401242,chr5:39420987-39421387,chr5:39422827-39423227,chr5:39423332-39423817,chr5:39423877-39424382	8
C9orf3	chr9:97685585-97685985	9
C9orf47	chr9:91346754-91347154,chr9:91347164-91347564,chr9:91361334-91361734,chr9:91364484-91364884,chr9:91441924-91442324,chr9:91442444-91442844	15
CACNA1G	chr17:48637870-48638299	13	hsa04930:Type II diabetes mellitus
CALD1	chr7:134375052-134375592,chr7:134415024-134415424	9	BP00285:Cell structure and motility; BP00286:Cell structure; hsa04270:Vascular smooth muscle contraction
CALM2	chr2:47321956-47322356	8	BP00102:Signal transduction; BP00111:Intracellular signaling cascade; BP00112:Calcium mediated signaling; BP00224:Cell proliferation and differentiation; hsa04020:Calcium signaling pathway; hsa04070:Phosphatidylinositol signaling system; hsa04916:Melanogenesis; hsa05214:Glioma
CALM3	chr19:47113312-47113712,chr19:47113742-47114142,chr19:47120151-47120551,chr19:47120731-47121131	8	BP00102:Signal transduction; BP00111:Intracellular signaling cascade; BP00112:Calcium mediated signaling; BP00224:Cell proliferation and differentiation; hsa04020:Calcium signaling pathway; hsa04070:Phosphatidylinositol signaling system; hsa04916:Melanogenesis; hsa05214:Glioma
CAMK2A	chr5:149594004-149594404,chr5:149643189-149643589,chr5:149678763-149679163	8	BP00063:Protein modification; BP00064:Protein phosphorylation; BP00102:Signal transduction; BP00111:Intracellular signaling cascade; BP00112:Calcium mediated signaling; BP00173:Muscle contraction; BP00193:Developmental processes; hsa04020:Calcium signaling pathway; hsa04916:Melanogenesis; hsa05214:Glioma
CAMK2G	chr10:75646854-75647293	9	BP00064:Protein phosphorylation
CAMKK1	chr17:3795227-3795721	8	BP00063:Protein modification; BP00064:Protein phosphorylation; BP00102:Signal transduction; BP00111:Intracellular signaling cascade; BP00112:Calcium mediated signaling
CAP2	chr6:17393692-17394092,chr6:17418181-17418971	8	BP00102:Signal transduction; BP00111:Intracellular signaling cascade; BP00119:Other intracellular signaling cascade; BP00274:Cell communication; BP00285:Cell structure and motility
CAPG	chr2:85619597-85619997,chr2:85640851-85641251	4	BP00285:Cell structure and motility; BP00286:Cell structure
CAPN12	chr19:39225576-39225976	4
CAPN2	chr1:223887981-223888381,chr1:223888781-223889181,chr1:223890321-223890721,chr1:223895021-223895421,chr1:223895521-223895921,chr1:223900701-223901101,chr1:223901331-223901731,chr1:223914735-223915135,chr1:223944501-223944977,chr1:223959247-223959647,chr1:223959937-223960337,chr1:223965601-223966001,chr1:223966047-223966447,chr1:223966987-223967387,chr1:223968071-223968471,chr1:223968611-223969011	4,8	BP00102:Signal transduction; hsa04510:Focal adhesion
CAPRIN2	chr12:30947673-30948073,chr12:30948104-30948872,chr12:30949764-30950182,chr12:30960314-30960714	8
CARS	chr11:3041245-3041645	11	BP00060:Protein metabolism and modification; hsa00970:Aminoacyl-tRNA biosynthesis
CASC5	chr15:40886104-40886736	1
CAV1	chr7:116144641-116145041,chr7:116148891-116149291,chr7:116150091-116150491,chr7:116191533-116191933,chr7:116216871-116217631	8	BP00102:Signal transduction; BP00129:Endocytosis; hsa04510:Focal adhesion
CAV2	chr7:115866599-115866999,chr7:115900958-115901358,chr7:115957091-115957491,chr7:116139286-116139701	4	hsa04510:Focal adhesion
CAV3	chr3:8801204-8801604	4	hsa04510:Focal adhesion
CBLB	chr3:105176472-105176872,chr3:105438096-105438496,chr3:105583346-105583746,chr3:106329265-106329665,chr3:106335795-106336315,chr3:106347285-106347685,chr3:106353505-106353905,chr3:106354285-106354685,chr3:106430523-106430923,chr3:106448019-106448739,chr3:106464079-106464479,chr3:106484257-106484951,chr3:106556481-106556881,chr3:106569263-106569671,chr3:106581053-106581453	8	BP00102:Signal transduction; BP00108:Receptor protein tyrosine kinase signaling pathway; hsa05200:Pathways in cancer
CBS	chr21:44473860-44474260	10	BP00013:Amino acid metabolism; BP00014:Amino acid biosynthesis; hsa00260:Glycine, serine and threonine metabolism
CBX5	chr12:54652128-54652528,chr12:54653078-54653498	8
CCBE1	chr18:57094923-57095323,chr18:57293912-57294312,chr18:57364341-57364741,chr18:57386603-57387003,chr18:57455218-57455618	1
CCDC107	chr9:35658695-35659095,chr9:35662195-35662595	6
CCDC19	chr1:159885394-159885794,chr1:159893263-159893684	8
CCDC80	chr3:112315932-112316332,chr3:112316878-112317278,chr3:112317808-112318208,chr3:112323322-112323722,chr3:112324162-112324562,chr3:112348409-112348809,chr3:112357209-112357609,chr3:112357815-112358215,chr3:112358505-112358905,chr3:112365952-112366352,chr3:112368222-112368795,chr3:112372265-112372732,chr3:112372745-112373181,chr3:112391464-112391864,chr3:112395774-112396197,chr3:112396357-112396757…	8	BP00193:Developmental processes
CCL2	chr17:32582120-32582520,chr17:32582599-32582999,chr17:32583389-32583789,chr17:32584039-32585049	10	BP00102:Signal transduction; BP00122:Ligand-mediated signaling; BP00274:Cell communication; hsa04060:Cytokine-cytokine receptor interaction
CCNA2	chr4:122733919-122734319,chr4:122735449-122735849	3	BP00203:Cell cycle; BP00207:Cell cycle control; hsa04110:Cell cycle; hsa04914:Progesterone-mediated oocyte maturation
CCNB1	chr5:68462854-68463254	3	BP00203:Cell cycle; BP00207:Cell cycle control; hsa04110:Cell cycle; hsa04114:Oocyte meiosis; hsa04914:Progesterone-mediated oocyte maturation
CCND1	chr11:69066059-69066750,chr11:69069488-69069940,chr11:69166852-69167252,chr11:69234761-69235161,chr11:69258614-69259014,chr11:69333054-69333456,chr11:69456745-69457374,chr11:69457905-69458334	4	BP00203:Cell cycle; BP00207:Cell cycle control; BP00282:Mitosis; hsa04110:Cell cycle; hsa04510:Focal adhesion; hsa05200:Pathways in cancer; hsa05219:Bladder cancer
CCNE2	chr8:95907175-95907612	6	BP00203:Cell cycle; BP00207:Cell cycle control; hsa04110:Cell cycle; hsa05200:Pathways in cancer
CCNH	chr5:86694740-86695490,chr5:86696541-86696941,chr5:86701790-86702190	8	BP00207:Cell cycle control
CCPG1	chr15:55636319-55636719,chr15:55639899-55640299,chr15:55644879-55645279,chr15:55694989-55695389,chr15:55695649-55696049	10	BP00193:Developmental processes
CCR7	chr17:38688752-38689152,chr17:38698386-38698786,chr17:38699052-38699452,chr17:38705855-38706359,chr17:38706745-38707155,chr17:38707555-38707955,chr17:38708789-38709229,chr17:38709322-38709822,chr17:38710055-38710542	13	BP00102:Signal transduction; BP00103:Cell surface receptor mediated signal transduction; BP00107:Cytokine and chemokine mediated signaling pathway
CD276	chr15:73977062-73977832	8	hsa04514:Cell adhesion molecules (CAMs)
CD44	chr11:35104009-35104409,chr11:35104939-35105339,chr11:35132762-35133162,chr11:35161053-35161553,chr11:35180074-35180474,chr11:35200690-35201090,chr11:35214010-35214410,chr11:35254429-35254829,chr11:35255079-35255479	1,4
CD59	chr11:33691698-33692098,chr11:33713455-33713855,chr11:33723012-33723645,chr11:33738479-33739039,chr11:33758232-33758632	4
CD9	chr12:6309207-6309800	4	BP00285:Cell structure and motility; BP00287:Cell motility
CDC20	chr1:43826522-43826922	4	BP00203:Cell cycle; BP00207:Cell cycle control; hsa04110:Cell cycle; hsa04114:Oocyte meiosis
CDC25A	chr3:48229650-48230068	1	hsa04110:Cell cycle
CDC42	chr1:22352107-22352507	4	BP00285:Cell structure and motility; hsa04510:Focal adhesion; hsa04810:Regulation of actin cytoskeleton; hsa05130:Pathogenic Escherichia coli infection; hsa05200:Pathways in cancer; hsa05211:Renal cell carcinoma
CDC45	chr22:19467268-19467741,chr22:19510735-19511135	3	BP00203:Cell cycle; hsa04110:Cell cycle
CDCA2	chr8:25316581-25317021,chr8:25374246-25374646	3
CDCA8	chr1:38158040-38158448,chr1:38176724-38177124	3
CDH11	chr16:64944100-64944500	4
CDH13	chr16:82662442-82662842,chr16:82693872-82694372,chr16:82728324-82728724,chr16:82728984-82729384	10	BP00102:Signal transduction; BP00124:Cell adhesion; BP00274:Cell communication; BP00281:Oncogenesis
CDH2	chr18:25559301-25559701,chr18:25643292-25643692,chr18:25645582-25645982,chr18:25692112-25692512,chr18:25695012-25695511	8	BP00102:Signal transduction; BP00120:Cell adhesion-mediated signaling; BP00124:Cell adhesion; BP00274:Cell communication; hsa04514:Cell adhesion molecules (CAMs); hsa05412:Arrhythmogenic right ventricular cardiomyopathy (ARVC)
CDIPT	chr16:29868230-29868630	15	BP00019:Lipid, fatty acid and steroid metabolism
CDK1	chr10:62702581-62703007	4	BP00063:Protein modification; BP00203:Cell cycle; BP00207:Cell cycle control; BP00282:Mitosis; hsa04110:Cell cycle
CDK15	chr2:202662797-202663197,chr2:202672168-202672568	4	BP00063:Protein modification; BP00203:Cell cycle; BP00207:Cell cycle control; BP00282:Mitosis
CDK2	chr12:56360308-56360811	6	BP00203:Cell cycle; BP00207:Cell cycle control; hsa04110:Cell cycle; hsa05200:Pathways in cancer
CDK6	chr7:92263960-92264360,chr7:92461800-92462200,chr7:92464369-92464769,chr7:92466350-92466750,chr7:92726516-92726916,chr7:92745114-92745514	8	BP00063:Protein modification; BP00064:Protein phosphorylation; BP00207:Cell cycle control; hsa05200:Pathways in cancer; hsa05214:Glioma
CDKN2B	chr9:22000917-22001339,chr9:22001437-22001837,chr9:22002007-22002407,chr9:22002987-22003387,chr9:22003497-22003897,chr9:22004737-22005507,chr9:22005667-22006067,chr9:22006087-22006487,chr9:22216256-22216656	10	BP00281:Oncogenesis
CDKN2C	chr1:51442540-51442940	6	BP00203:Cell cycle; BP00207:Cell cycle control; hsa04110:Cell cycle
CDKN3	chr14:54863559-54864004	6	BP00203:Cell cycle
CDO1	chr5:115137674-115138074,chr5:115152088-115152908	15
CEBPA	chr19:33793130-33793530,chr19:33793736-33794136	15	BP00179:Apoptosis
CEBPD	chr8:48281881-48282522,chr8:48341154-48341554,chr8:48437529-48437929,chr8:48540195-48540610,chr8:48572846-48573289,chr8:48646611-48647011,chr8:48647674-48648121,chr8:48648354-48648754,chr8:48650261-48650922	13
CELSR3	chr3:48682374-48682774	13	BP00101:Sulfur metabolism; BP00102:Signal transduction; BP00103:Cell surface receptor mediated signal transduction; BP00146:Extracellular transport and import; BP00193:Developmental processes
CENPE	chr4:104119230-104119705	1
CENPF	chr1:214776208-214776862,chr1:214777848-214778248,chr1:215130870-215131350,chr1:215246402-215246802	3
CENPH	chr5:68485040-68485440	4
CENPI	chrX:100352751-100353151	1
CENPN	chr16:81040703-81041114	1
CENPT	chr16:67881345-67881775	4
CEP170	chr1:243416762-243417162,chr1:243417192-243417592,chr1:243418822-243419241,chr1:243419542-243419942	1,4
CEP57	chr11:95523328-95523728	4
CEP95	chr17:62525260-62525660,chr17:62529130-62529530,chr17:62529700-62530100,chr17:62534827-62535227	4
CERCAM	chr9:131183379-131183779	8	BP00124:Cell adhesion
CFD	chr19:859528-859929	15	BP00148:Immunity and defense; BP00153:Complement-mediated immunity; hsa04610:Complement and coagulation cascades
CFL2	chr14:35183037-35183451	8	BP00285:Cell structure and motility; BP00286:Cell structure; hsa04360:Axon guidance; hsa04666:Fc gamma R-mediated phagocytosis; hsa04810:Regulation of actin cytoskeleton
CFLAR	chr2:201983001-201983574,chr2:201992114-201992557,chr2:202017714-202018114	13
CHAC1	chr15:41250003-41250403	10
CHI3L2	chr1:111733503-111733903	15	BP00001:Carbohydrate metabolism
CHID1	chr11:892745-893145	4	BP00009:Other polysaccharide metabolism
CHMP6	chr17:78806876-78807387,chr17:78807926-78808326,chr17:78977453-78977853	8
CHRDL1	chrX:109984611-109985011,chrX:110038781-110039203	13	BP00193:Developmental processes
CHRNA2	chr8:27320243-27320643	14	BP00102:Signal transduction; BP00274:Cell communication
CHRNG	chr2:233404056-233404456	15	BP00102:Signal transduction
CHST6	chr16:75543401-75543801	11
CHST7	chrX:46433035-46433486,chrX:46458519-46458919	13
CIC	chr19:42785250-42785678	8
CIDEC	chr3:9904430-9904830	15	BP00179:Apoptosis
CIT	chr12:120241162-120241562	1
CKAP2L	chr2:113522209-113522609	4
CKAP4	chr12:106642071-106642471	8
CKAP5	chr11:46760241-46760641	1
CKS2	chr9:91925909-91926349	6
CLDN14	chr21:37802173-37802883,chr21:37803093-37803494,chr21:37809354-37809754,chr21:37850740-37851140,chr21:37872263-37872674,chr21:37923959-37924375	8	BP00285:Cell structure and motility; BP00286:Cell structure; hsa04514:Cell adhesion molecules (CAMs); hsa04530:Tight junction; hsa04670:Leukocyte transendothelial migration
CLDN4	chr7:73245201-73245601,chr7:73256121-73256521	4	BP00285:Cell structure and motility; BP00286:Cell structure
CLIC3	chr9:139890674-139891270,chr9:139892040-139892440	8
CLIP1	chr12:122867483-122867883,chr12:122883993-122884575,chr12:122884873-122885334	8	BP00285:Cell structure and motility; BP00286:Cell structure
CLMN	chr14:95651790-95652190	15
CLMP	chr11:123300168-123300568,chr11:123300868-123301368,chr11:123301611-123302038	1
CLN8	chr8:1712428-1712828	9
CLTA	chr9:36191659-36192059	4	hsa04142:Lysosome
CLTC	chr17:57776111-57776546	4	hsa04142:Lysosome
CLTCL1	chr22:19277279-19277679	9
CMAHP	chr6:25137733-25138133,chr6:25166550-25166950,chr6:25169860-25170260,chr6:25193937-25194337	8
CMKLR1	chr12:108732824-108733224	10	BP00102:Signal transduction; BP00193:Developmental processes; BP00201:Skeletal development; BP00248:Mesoderm development
CMTM4	chr16:66641935-66642335,chr16:66690558-66690958,chr16:66694555-66695028	15
CMTM8	chr3:32218856-32219256,chr3:32280022-32280422	13
CNST	chr1:246730608-246731018	4
COL11A1	chr1:103497806-103498206,chr1:103521749-103522149,chr1:103540859-103541259,chr1:103542049-103542449,chr1:103571209-103571609,chr1:103571769-103572169,chr1:103574189-103574654	14	BP00193:Developmental processes
COL14A1	chr8:120893054-120893454,chr8:121137105-121137642,chr8:121166082-121166482,chr8:121217704-121218104	10	BP00102:Signal transduction; BP00124:Cell adhesion; BP00193:Developmental processes; BP00201:Skeletal development; BP00248:Mesoderm development; BP00274:Cell communication; BP00286:Cell structure
COL15A1	chr9:101610939-101611339,chr9:101760728-101761128	10	BP00286:Cell structure
COL16A1	chr1:32115992-32116392	8	BP00102:Signal transduction; BP00124:Cell adhesion; BP00274:Cell communication; BP00285:Cell structure and motility; BP00286:Cell structure
COL1A2	chr7:93976705-93977105,chr7:93977135-93977535,chr7:93978095-93978495,chr7:94003002-94003402,chr7:94062138-94062538	10	BP00124:Cell adhesion; BP00286:Cell structure; hsa04510:Focal adhesion; hsa04512:ECM-receptor interaction
COL3A1	chr2:189651794-189652325,chr2:189653190-189653590,chr2:189840318-189840798,chr2:189841154-189841554,chr2:189880834-189881234,chr2:189929108-189929508	10,12	BP00124:Cell adhesion; BP00285:Cell structure and motility; BP00286:Cell structure; hsa04510:Focal adhesion; hsa04512:ECM-receptor interaction
COL5A1	chr9:137394685-137395085,chr9:137418040-137418440,chr9:137516553-137516953	9	hsa04510:Focal adhesion; hsa04512:ECM-receptor interaction
COL6A3	chr2:238165039-238165439,chr2:238227562-238228335,chr2:238229821-238230221	12	BP00124:Cell adhesion; BP00285:Cell structure and motility; hsa04510:Focal adhesion; hsa04512:ECM-receptor interaction
COL8A1	chr3:98967022-98967422,chr3:99222250-99222650,chr3:99227066-99227466,chr3:99227556-99227956,chr3:99227966-99228366,chr3:99295490-99295890,chr3:99357279-99357727,chr3:99357969-99358819,chr3:99377897-99378297,chr3:99411497-99411897,chr3:99451327-99451847,chr3:99459926-99460326,chr3:99470363-99470763,chr3:99471453-99471853,chr3:99474266-99474666,chr3:99499863-99500263,chr3:99519916-99520576,chr3:995…	14	BP00102:Signal transduction; BP00274:Cell communication
COL8A2	chr1:36561325-36561725,chr1:36566105-36566505,chr1:36574575-36574975,chr1:36599209-36599636,chr1:36600709-36601109	8,9	BP00285:Cell structure and motility; BP00286:Cell structure
COMP	chr19:18892840-18893240,chr19:18900812-18901369,chr19:18901822-18902280	13	BP00193:Developmental processes; hsa04350:TGF-beta signaling pathway
COPS8	chr2:238030976-238031438,chr2:238064513-238064913,chr2:238065151-238065553,chr2:238116524-238117284,chr2:238136439-238137161,chr2:238142571-238142971,chr2:238150103-238150583,chr2:238152562-238152962,chr2:238153043-238153692,chr2:238186321-238186721,chr2:238187051-238187516,chr2:238187991-238188391,chr2:238221932-238222332,chr2:238223002-238223402,chr2:238320482-238321031	15
COQ10A	chr12:56651294-56651694	4
CORO1C	chr12:109032493-109032893,chr12:109034851-109035251,chr12:109085357-109085757,chr12:109090484-109090884,chr12:109219938-109220479,chr12:109231930-109232449,chr12:109248689-109249089	4	BP00203:Cell cycle; BP00282:Mitosis; BP00285:Cell structure and motility; BP00286:Cell structure; BP00287:Cell motility
CORO6	chr17:27940465-27940953,chr17:27941975-27942375,chr17:27949615-27950062,chr17:27950705-27951105,chr17:27951955-27952355,chr17:27966649-27967049,chr17:28087859-28088259,chr17:28088418-28088818	15	BP00102:Signal transduction; BP00277:Phagocytosis; BP00285:Cell structure and motility
CPA4	chr7:129932874-129933274,chr7:129933457-129933857	4
CPEB1	chr15:83235345-83235745	10	BP00193:Developmental processes
CPEB2	chr4:15074594-15074994	9
CPNE7	chr16:89661606-89662006,chr16:89663546-89663946	6
CPZ	chr4:8594313-8594713,chr4:8608977-8609377	10
CRABP2	chr1:156675111-156675511,chr1:156676106-156676506,chr1:156676601-156677002	10	BP00102:Signal transduction; BP00193:Developmental processes; BP00274:Cell communication
CRAT	chr9:131863277-131863677	4
CREB3L1	chr11:46258722-46259193,chr11:46264033-46264602,chr11:46271073-46271473,chr11:46299668-46300265,chr11:46301124-46301578,chr11:46306988-46307424,chr11:46313085-46313485,chr11:46344768-46345168,chr11:46345888-46346288	8	hsa04916:Melanogenesis
CRELD1	chr3:9974220-9974620,chr3:9974877-9975277,chr3:9984387-9984787	15
CRHR2	chr7:30687341-30687812,chr7:30688561-30689092,chr7:30699891-30700291,chr7:30700361-30700761,chr7:30703020-30703420	10	BP00102:Signal transduction
CRIM1	chr2:36660430-36660830	4
CRIP1	chr14:105942142-105942674,chr14:105942802-105943304,chr14:105954202-105954603,chr14:105955932-105956842,chr14:105956992-105958122	8	BP00193:Developmental processes
CRISPLD2	chr16:84808508-84808908,chr16:84853443-84854223,chr16:84862752-84863152,chr16:84869883-84870283,chr16:84941114-84941514,chr16:84944084-84944484	13
CRYAB	chr11:111784519-111785094	4
CRYM	chr16:21312588-21313071,chr16:21314248-21314695	8,9
CSF1	chr1:110414849-110415249	13	BP00102:Signal transduction; BP00103:Cell surface receptor mediated signal transduction; BP00107:Cytokine and chemokine mediated signaling pathway; BP00193:Developmental processes; BP00248:Mesoderm development
CSF1R	chr5:149445560-149446450,chr5:149446500-149446900	8	BP00063:Protein modification; BP00064:Protein phosphorylation; BP00102:Signal transduction; BP00108:Receptor protein tyrosine kinase signaling pathway; BP00193:Developmental processes; BP00224:Cell proliferation and differentiation; BP00242:Embryogenesis; BP00285:Cell structure and motility; BP00287:Cell motility; hsa04640:Hematopoietic cell lineage; hsa05200:Pathways in cancer
CSK	chr15:75079811-75080211,chr15:75096599-75096999	4	BP00063:Protein modification; BP00203:Cell cycle; BP00207:Cell cycle control; hsa04810:Regulation of actin cytoskeleton
CSPG4	chr15:75965925-75966325	1
CSRNP1	chr3:39188563-39188984,chr3:39192385-39193014,chr3:39193804-39194204	8
CSRP1	chr1:201475259-201475659,chr1:201562241-201562641,chr1:201568051-201568451,chr1:201571911-201572311,chr1:201594471-201594871	8,9	BP00193:Developmental processes
CTBS	chr1:85069608-85070008	9
CTGF	chr6:132268696-132269096,chr6:132435562-132435962	9	BP00275:Extracellular matrix protein-mediated signaling
CTHRC1	chr8:104385320-104385812	9
CTIF	chr18:46233205-46233605	9
CTNNAL1	chr9:111774633-111775248	4	BP00285:Cell structure and motility; BP00286:Cell structure; BP00287:Cell motility
CTNNB1	chr3:40918849-40919397,chr3:41241489-41241909,chr3:41242129-41242769,chr3:41250308-41250708,chr3:41255429-41255829,chr3:41283639-41284039,chr3:41284349-41284749,chr3:41285029-41287048,chr3:41287289-41287689,chr3:41288059-41288459,chr3:41288964-41289364	13	BP00102:Signal transduction; hsa04310:Wnt signaling pathway; hsa05213:Endometrial cancer
CTPS	chr1:41446160-41446720	1	hsa00240:Pyrimidine metabolism
CTSD	chr11:1848395-1848905	15
CTTN	chr11:70127161-70127561,chr11:70245368-70246199,chr11:70283173-70283573	4,8	BP00285:Cell structure and motility; hsa04530:Tight junction; hsa05130:Pathogenic Escherichia coli infection
CTTNBP2NL	chr1:112937478-112937878,chr1:113044593-113044993	8
CTU2	chr16:88772689-88773109,chr16:88773358-88773758,chr16:88840218-88840619	8
CUTA	chr6:33384446-33384846	4
CXCL1	chr4:74734903-74735406,chr4:74735811-74736291,chr4:74737386-74737851,chr4:74738011-74738411	14	BP00102:Signal transduction; BP00103:Cell surface receptor mediated signal transduction; BP00107:Cytokine and chemokine mediated signaling pathway; BP00111:Intracellular signaling cascade; BP00112:Calcium mediated signaling; BP00115:NF-kappaB cascade; BP00122:Ligand-mediated signaling; BP00155:Macrophage-mediated immunity; BP00224:Cell proliferation and differentiation; BP00274:Cell communication…
CXCL12	chr10:44385660-44386330,chr10:44387410-44387810,chr10:44864497-44864897,chr10:44880025-44880425,chr10:45065125-45065599,chr10:45357398-45357798,chr10:45359468-45359868,chr10:45359904-45360498	8	hsa04360:Axon guidance; hsa04670:Leukocyte transendothelial migration
CXCL16	chr17:4642581-4642987	13
CXCL3	chr4:74904428-74904828	14	BP00102:Signal transduction; BP00103:Cell surface receptor mediated signal transduction; BP00107:Cytokine and chemokine mediated signaling pathway; BP00111:Intracellular signaling cascade; BP00112:Calcium mediated signaling; BP00115:NF-kappaB cascade; BP00122:Ligand-mediated signaling; BP00155:Macrophage-mediated immunity; BP00224:Cell proliferation and differentiation; BP00274:Cell communication…
CXCR5	chr11:118758494-118758894	10	BP00102:Signal transduction; BP00193:Developmental processes; hsa04060:Cytokine-cytokine receptor interaction
CXCR7	chr2:237478277-237478724,chr2:237492117-237492637,chr2:237570278-237570678	13	BP00102:Signal transduction; BP00103:Cell surface receptor mediated signal transduction
CXXC5	chr5:139030433-139031076,chr5:139040485-139040926,chr5:139077113-139077513,chr5:139126451-139126851,chr5:139127258-139127658,chr5:139145220-139145620,chr5:139167181-139167581	8,9
CYB561	chr17:61458127-61458527,chr17:61512455-61512955,chr17:61515315-61515715	13
CYGB	chr17:74523550-74524110	12
CYP17A1	chr10:104556035-104556660,chr10:104566325-104566725,chr10:104574385-104574785,chr10:104575105-104575505,chr10:104575589-104576017,chr10:104578367-104578767,chr10:104581289-104581689,chr10:104596977-104597377	13	hsa00140:Steroid hormone biosynthesis
CYP1B1	chr2:38320152-38320552,chr2:38343492-38343892,chr2:38397505-38397905,chr2:38398174-38398574	13	hsa00140:Steroid hormone biosynthesis; hsa00980:Metabolism of xenobiotics by cytochrome P450
CYR61	chr1:86094333-86094733	9	BP00285:Cell structure and motility; BP00287:Cell motility
CYTH3	chr7:6296217-6296617,chr7:6310677-6311077	8
DAAM2	chr6:39760091-39760491,chr6:39760639-39761137,chr6:39780401-39780861,chr6:39789631-39790229,chr6:39791039-39791439	13	hsa04310:Wnt signaling pathway
DAB2IP	chr9:124506371-124506771	8
DACT1	chr14:59332416-59332816,chr14:59332916-59333316,chr14:59343418-59343818,chr14:59421849-59422249	10
DAGLA	chr11:61513993-61514448	8
DAP	chr5:10676476-10676876	8	BP00102:Signal transduction; BP00111:Intracellular signaling cascade
DAPK3	chr19:3951171-3951571,chr19:3955711-3956111,chr19:3968607-3969007,chr19:3969434-3969861,chr19:3982214-3982614	4,8	BP00063:Protein modification; BP00064:Protein phosphorylation; hsa05200:Pathways in cancer; hsa05219:Bladder cancer
DARS2	chr1:173793021-173793556,chr1:173829172-173829572	6
DBC1	chr9:122131436-122132190	13
DBN1	chr5:176902587-176903047,chr5:176903487-176903887	9	BP00285:Cell structure and motility; BP00286:Cell structure
DBNDD2	chr20:44034566-44035348	8	BP00193:Developmental processes
DCBLD2	chr3:98587412-98587812,chr3:98614542-98614942,chr3:98619772-98620191	8
DCK	chr4:71858538-71858938	6	BP00031:Nucleoside, nucleotide and nucleic acid metabolism
DCLK2	chr4:151020003-151020403,chr4:151146183-151146583,chr4:151157151-151157551,chr4:151157591-151158011,chr4:151182611-151183011,chr4:151201191-151201591,chr4:151201779-151202231	8	BP00063:Protein modification; BP00064:Protein phosphorylation; BP00285:Cell structure and motility; BP00286:Cell structure
DCN	chr12:91536967-91537467,chr12:91537687-91538087,chr12:91553867-91554267,chr12:91556607-91557377,chr12:91571931-91572427,chr12:91572767-91573461,chr12:91574551-91575357,chr12:91576337-91576761,chr12:91613151-91613684,chr12:91618469-91619589,chr12:92535247-92535647,chr12:92536041-92536441	13	BP00102:Signal transduction; BP00193:Developmental processes; BP00248:Mesoderm development; hsa04350:TGF-beta signaling pathway
DCTN1	chr2:74607144-74607584	4
DCUN1D3	chr16:20855098-20855498,chr16:20856558-20856958	13
DDAH1	chr1:85795302-85796086	4
DDAH2	chr6:31702006-31702406,chr6:31702582-31703266	8	BP00224:Cell proliferation and differentiation
DDIT3	chr12:57910960-57911360,chr12:57912680-57913080	11
DDIT4	chr10:73989161-73989647,chr10:74008534-74008934,chr10:74014679-74015079,chr10:74075626-74076226	13
DDIT4L	chr4:101110973-101111871	13
DDX41	chr5:176956797-176957197	9
DEK	chr6:18221166-18221566	1
DEPDC1	chr1:68962489-68962919	3
DEPDC7	chr11:33037654-33038054	1
DEPTOR	chr8:121079266-121079666,chr8:121082256-121082656	14
DGAT2	chr11:75479595-75480056,chr11:75482436-75482836	15	BP00019:Lipid, fatty acid and steroid metabolism; BP00020:Fatty acid metabolism
DGKI	chr7:137223225-137223625,chr7:137352476-137352876,chr7:137353126-137353526,chr7:137355046-137355446,chr7:137367332-137367732,chr7:137441768-137442168,chr7:137456584-137456984,chr7:137457604-137458004,chr7:137474961-137475361,chr7:137477271-137477671,chr7:137562694-137563190,chr7:137563884-137564284,chr7:137649004-137649404,chr7:137654994-137655394	8	BP00102:Signal transduction; BP00111:Intracellular signaling cascade; BP00119:Other intracellular signaling cascade; hsa04070:Phosphatidylinositol signaling system
DGKZ	chr11:46317244-46317654	4
DHCR24	chr1:55311476-55311876,chr1:55312516-55312916,chr1:55349291-55349691	13
DHRS1	chr14:24768117-24768856	4
DHRS3	chr1:12508156-12508556,chr1:12518466-12518866,chr1:12585591-12585991,chr1:12600199-12600599,chr1:12653734-12654271,chr1:12675501-12675901	13,15	BP00289:Other metabolism
DIEXF	chr1:210009168-210009568,chr1:210056536-210056936,chr1:210057486-210057886	8
DIP2C	chr10:644587-644987,chr10:850575-850975,chr10:852344-852744	4
DIRAS1	chr19:2719834-2720234	10	BP00102:Signal transduction
DKK1	chr10:54073183-54073583,chr10:54073892-54074329,chr10:54074542-54074942,chr10:54074966-54075366,chr10:54077046-54077453,chr10:54077836-54078282	6	hsa04310:Wnt signaling pathway
DKK3	chr11:11983263-11983663,chr11:11997773-11998411,chr11:11998601-11999287,chr11:12101429-12101829,chr11:12101889-12102289,chr11:12107157-12107557,chr11:12107680-12108120,chr11:12108337-12108737,chr11:12108937-12109337,chr11:12109497-12109897	8
DLC1	chr8:12937846-12938246,chr8:12938485-12938885,chr8:12989255-12989655,chr8:12989825-12990225,chr8:13007291-13007691,chr8:13051598-13051998,chr8:13115458-13115858,chr8:13122838-13123238,chr8:13133107-13133507,chr8:13133168-13133568,chr8:13210773-13211173,chr8:13224297-13224799	4,8	BP00102:Signal transduction
DLD	chr7:107558566-107558966,chr7:107560346-107560746,chr7:107560796-107561313,chr7:107579442-107579842	15	hsa00620:Pyruvate metabolism
DLG1	chr3:196763395-196763795,chr3:196782638-196783038,chr3:196810505-196810905,chr3:196819115-196819515,chr3:196820988-196821388,chr3:196886385-196886785,chr3:196896595-196896995,chr3:196946345-196946745,chr3:196961825-196962508,chr3:197013158-197013685,chr3:197024235-197024635	8	BP00102:Signal transduction
DLG3	chrX:69671953-69672359	9
DLG5	chr10:79473231-79473631,chr10:79547431-79547831,chr10:79601711-79602111,chr10:79603051-79603451,chr10:79616951-79617351,chr10:79628991-79629391,chr10:79632351-79632751,chr10:79633401-79633881,chr10:79647471-79647877,chr10:79647921-79648321,chr10:79672417-79672817	13,15	BP00285:Cell structure and motility
DLX5	chr7:96647151-96648009,chr7:96648076-96648476,chr7:96649899-96650299,chr7:96650399-96650799,chr7:96651206-96651606,chr7:96651859-96652259	15
DNAJC6	chr1:65713611-65714011,chr1:65730247-65730734	13	BP00064:Protein phosphorylation
DNMBP	chr10:101632200-101632909,chr10:101634320-101634720,chr10:101736826-101737226	1,4
DNMT1	chr19:10304430-10304830	1
DNTTIP2	chr1:94373189-94373809	13
DOCK10	chr2:225667303-225667703,chr2:225795968-225796368,chr2:225891858-225892258,chr2:225899777-225900177,chr2:225905807-225906499,chr2:225964758-225965914,chr2:225968318-225968718	8	BP00102:Signal transduction; BP00111:Intracellular signaling cascade; BP00119:Other intracellular signaling cascade; BP00129:Endocytosis; BP00285:Cell structure and motility; BP00287:Cell motility
DOCK5	chr8:25101951-25102351	3
DOK1	chr2:74786939-74787488,chr2:74787498-74788004,chr2:74795771-74796210,chr2:74804676-74805091,chr2:74810521-74811146	8	BP00102:Signal transduction; BP00285:Cell structure and motility; BP00287:Cell motility
DOK5	chr20:52838748-52839148	4
DOT1L	chr19:2167195-2167595,chr19:2186133-2186533,chr19:2208353-2208753	1
DPAGT1	chr11:118971916-118972316	4	BP00009:Other polysaccharide metabolism; BP00063:Protein modification; BP00067:Protein glycosylation
DPF1	chr19:38700392-38700832,chr19:38701078-38701478	1
DPM2	chr9:130710836-130711236,chr9:130730891-130731416,chr9:130741711-130742111	8
DPP9	chr19:4683536-4683936	1
DPYSL3	chr5:146863428-146863828	9
DRAP1	chr11:65682593-65682993,chr11:65683249-65683649	6	BP00031:Nucleoside, nucleotide and nucleic acid metabolism
DSE	chr6:116718626-116719026,chr6:116727166-116727622,chr6:116756502-116756902	8
DSP	chr6:7468681-7469081	8	hsa05412:Arrhythmogenic right ventricular cardiomyopathy (ARVC)
DST	chr6:56313598-56313998,chr6:56313673-56314073,chr6:56381173-56381573,chr6:56400708-56401108,chr6:56419663-56420063,chr6:56420313-56420713,chr6:56446308-56446708,chr6:56476463-56476920,chr6:56557850-56558250,chr6:56592403-56592803,chr6:56614533-56614933,chr6:56682828-56683228,chr6:56707408-56707808,chr6:56707789-56708209	4,8,9	BP00124:Cell adhesion; BP00203:Cell cycle; BP00207:Cell cycle control; BP00285:Cell structure and motility
DSTN	chr20:17538741-17539141	9	BP00285:Cell structure and motility; BP00286:Cell structure
DTL	chr1:212208936-212209336	1
DUSP1	chr5:172193163-172193874,chr5:172194519-172194919,chr5:172195773-172196173,chr5:172227041-172227521	13	BP00064:Protein phosphorylation; BP00102:Signal transduction; BP00111:Intracellular signaling cascade; BP00114:MAPKKK cascade; BP00193:Developmental processes; BP00207:Cell cycle control; BP00248:Mesoderm development
DUSP2	chr2:96810931-96811340	1	hsa04010:MAPK signaling pathway
DUSP3	chr17:41843698-41844098	8	BP00063:Protein modification; BP00102:Signal transduction; BP00111:Intracellular signaling cascade; BP00119:Other intracellular signaling cascade
DUSP4	chr8:29207936-29208498	13	BP00064:Protein phosphorylation; BP00102:Signal transduction; BP00111:Intracellular signaling cascade; BP00114:MAPKKK cascade; BP00193:Developmental processes; BP00207:Cell cycle control; BP00248:Mesoderm development
DUSP6	chr12:89619612-89620012,chr12:89744956-89745356	9	BP00064:Protein phosphorylation
DUSP7	chr3:52080690-52081090	8	BP00063:Protein modification; BP00064:Protein phosphorylation; BP00102:Signal transduction; BP00111:Intracellular signaling cascade; BP00224:Cell proliferation and differentiation
DVL1	chr1:1283362-1283782	4	hsa05200:Pathways in cancer
DYNC1H1	chr14:102432060-102432460,chr14:102523253-102523653	8	BP00193:Developmental processes; BP00224:Cell proliferation and differentiation; BP00285:Cell structure and motility; BP00286:Cell structure
DYNLL2	chr17:56173144-56173544	6
DYRK2	chr12:68043835-68044235	9	BP00064:Protein phosphorylation
DZIP1L	chr3:137834010-137834727	4
E2F7	chr12:77413892-77414292,chr12:77459047-77459882	8	BP00102:Signal transduction; BP00193:Developmental processes; BP00207:Cell cycle control; BP00224:Cell proliferation and differentiation
EBF1	chr5:158117840-158118240,chr5:158118770-158119170,chr5:158119410-158119810,chr5:158202330-158202730,chr5:158292700-158293100,chr5:158404791-158405191,chr5:158461361-158461761,chr5:158477461-158477958,chr5:158478440-158478891,chr5:158479281-158479841,chr5:158521891-158522470,chr5:158523731-158524131,chr5:158525901-158526301,chr5:158527871-158528781,chr5:158529531-158529931,chr5:158531711-158532111…	13
ECM1	chr1:150487662-150488119	4
ECM2	chr9:95268316-95268716	11
ECT2	chr3:172468577-172468977	1
EDN1	chr6:12290383-12290845,chr6:12296288-12296688	3
EFHD2	chr1:15733695-15734095	1
EFNA1	chr1:155100249-155100669	15
EFTUD1	chr15:82374677-82375077,chr15:82409554-82409954,chr15:82415191-82415591,chr15:82415601-82416001,chr15:82425100-82425500,chr15:82452138-82452538	8
EGFR	chr7:55169742-55170142,chr7:55232032-55232432,chr7:55253732-55254132,chr7:55275032-55275432,chr7:55276042-55276442	1	hsa04010:MAPK signaling pathway; hsa04520:Adherens junction
EGR2	chr10:64577524-64577924	10	BP00193:Developmental processes
EHD1	chr11:64616854-64617392,chr11:64631795-64632195	8	BP00129:Endocytosis
EHD4	chr15:42264855-42265255	9
EID3	chr12:104750205-104750898	13
EIF4EBP1	chr8:37888504-37888984	11	BP00060:Protein metabolism and modification
ELAC2	chr17:12893182-12893582,chr17:13465448-13465848	4
ELF4	chrX:129194781-129195181,chrX:129197311-129197711	8	BP00102:Signal transduction; BP00111:Intracellular signaling cascade; BP00193:Developmental processes
ELFN1	chr7:1979174-1979574	8
ELL2	chr5:95671943-95672343	15
ELN	chr7:73442389-73442796	3
ELOVL1	chr1:43829390-43829790,chr1:43832773-43833463	3,4
EME1	chr17:48456861-48457261,chr17:48457561-48458220	4
EMP3	chr19:48829037-48829442,chr19:48836022-48836527	8	BP00193:Developmental processes; BP00224:Cell proliferation and differentiation; BP00264:Tumor suppressor
ENAH	chr1:225632491-225632891,chr1:225662774-225663174,chr1:225670174-225670644,chr1:225671244-225671764,chr1:225671834-225672324,chr1:225673234-225674294,chr1:225678394-225678794,chr1:225696144-225696544,chr1:225699464-225699864,chr1:225703604-225704004,chr1:225705224-225705624,chr1:225715314-225715714,chr1:225731504-225731904,chr1:225790464-225790864	14
ENO3	chr17:4851229-4851629	4
EPG5	chr18:43534438-43534838	4
EPHA2	chr1:16471642-16472042,chr1:16473180-16473580	1
EPHB1	chr3:134515176-134515576	15	BP00102:Signal transduction; BP00103:Cell surface receptor mediated signal transduction
EPHX1	chr1:226034351-226034751,chr1:226036338-226036738	13	hsa00980:Metabolism of xenobiotics by cytochrome P450
EPOR	chr19:11491614-11492085	4
EPRS	chr1:220162627-220163027	10	BP00074:Amino acid activation; hsa00970:Aminoacyl-tRNA biosynthesis
ERBB2IP	chr5:65379729-65380129,chr5:65396102-65396502	6
ERCC6	chr10:50656722-50657122,chr10:50693032-50693432,chr10:50743012-50743472,chr10:50746042-50746832,chr10:50747452-50747934,chr10:50757998-50758703	8
ESCO2	chr8:27500740-27501140,chr8:27530660-27531060	4	BP00203:Cell cycle; BP00206:Chromosome segregation; BP00282:Mitosis
ESM1	chr5:54281189-54281637	1
ESPL1	chr12:53662160-53662560	1	hsa04110:Cell cycle
ETV4	chr17:41607824-41608244,chr17:41669025-41669425	8	BP00193:Developmental processes
ETV5	chr3:185678046-185678446	9
EXT1	chr8:118822942-118823342,chr8:118843582-118843982,chr8:119119558-119119958,chr8:119945397-119945797	4	BP00009:Other polysaccharide metabolism; BP00063:Protein modification; BP00067:Protein glycosylation
EYA1	chr8:72273871-72274420	13	BP00193:Developmental processes
EYA2	chr20:45523040-45523473,chr20:45523533-45524441,chr20:45525813-45526523,chr20:45534093-45534493,chr20:45543561-45543961,chr20:45565343-45565743,chr20:45566003-45566441,chr20:45583185-45583681,chr20:45592303-45592731,chr20:45669471-45669871,chr20:45691431-45691831,chr20:45700371-45700771,chr20:45747511-45747971,chr20:45762441-45762841,chr20:45824231-45824631,chr20:45825001-45825401,chr20:45960159-…	13	BP00193:Developmental processes
EZR	chr6:159184098-159184498,chr6:159290806-159291206	1
F3	chr1:94993165-94993825,chr1:94993955-94994355	15	BP00102:Signal transduction; BP00148:Immunity and defense; hsa04610:Complement and coagulation cascades
FADD	chr11:69981508-69981908,chr11:70049923-70050375	4	hsa05200:Pathways in cancer
FADS1	chr11:61567193-61567652,chr11:61568943-61569343,chr11:61570123-61570523,chr11:61581810-61582292	15	hsa01040:Biosynthesis of unsaturated fatty acids
FADS2	chr11:61623719-61624119,chr11:61636279-61636679,chr11:61637229-61637773,chr11:61638409-61639143	13	hsa01040:Biosynthesis of unsaturated fatty acids; hsa03320:PPAR signaling pathway
FADS3	chr11:61639369-61639843,chr11:61640272-61640672,chr11:61650762-61651162	15
FAM110A	chr20:814206-814606	1
FAM111A	chr11:58909526-58909926	4
FAM114A1	chr4:38869800-38870528,chr4:38870408-38870808,chr4:38874170-38874570,chr4:38921070-38921470,chr4:38931570-38931970,chr4:38950141-38950610	8,9
FAM129A	chr1:184942586-184943080,chr1:184943336-184943760	10	BP00281:Oncogenesis
FAM132B	chr2:239064569-239064969,chr2:239066239-239066779,chr2:239067829-239068229,chr2:239068339-239068839,chr2:239078379-239078866	10	BP00286:Cell structure
FAM134B	chr5:16627513-16627913,chr5:16656868-16657268	15
FAM159A	chr1:53134315-53134715	13
FAM176A	chr2:75784592-75784992,chr2:75786201-75786665,chr2:75787927-75788327	4
FAM180A	chr7:135428977-135429446	4
FAM200B	chr4:15684111-15684651	8
FAM20A	chr17:66562547-66562947,chr17:66573232-66573632,chr17:66595307-66595742,chr17:66595847-66596322,chr17:66596512-66597017,chr17:66597132-66597532	15
FAM213B	chr1:2518459-2518867	6
FAM214B	chr9:35111586-35112058,chr9:35112127-35112578,chr9:35114252-35114666	8
FAM65A	chr16:67555149-67555549	4
FAM65B	chr6:24831967-24832410,chr6:24911326-24911726,chr6:25006991-25007391,chr6:25010361-25011161,chr6:25010898-25011298	13,14
FAM82A1	chr2:38291989-38292449,chr2:38292599-38292999,chr2:38297959-38298359,chr2:38300779-38301179	14
FANK1	chr10:127693399-127693833,chr10:127694823-127695223,chr10:127751079-127751479,chr10:127751813-127752213,chr10:127752709-127753109,chr10:127769509-127769909,chr10:127791852-127792332	8
FAP	chr2:163023486-163023886,chr2:163024576-163024976,chr2:163025136-163025536,chr2:163026026-163026426,chr2:163048656-163049056,chr2:163077146-163077546,chr2:163077606-163078006,chr2:163083956-163084356,chr2:163089226-163089626,chr2:163089726-163090126,chr2:163092232-163092632,chr2:163097326-163097726,chr2:163098572-163098972,chr2:163099142-163100122,chr2:163100932-163101376,chr2:163118042-163118457	8	BP00102:Signal transduction
FASN	chr17:80034325-80034725	13
FAT1	chr4:187765395-187765795,chr4:188400078-188400478	8	BP00102:Signal transduction; BP00120:Cell adhesion-mediated signaling; BP00124:Cell adhesion; BP00193:Developmental processes; BP00242:Embryogenesis; BP00274:Cell communication; BP00285:Cell structure and motility; BP00286:Cell structure; BP00287:Cell motility
FBLIM1	chr1:16076051-16076451,chr1:16113490-16113890	4	BP00285:Cell structure and motility; BP00286:Cell structure; BP00287:Cell motility
FBLN1	chr22:45850021-45850721,chr22:45864750-45865330,chr22:45898198-45898598,chr22:45899345-45899911,chr22:45900548-45901205,chr22:45907671-45908071,chr22:45912838-45913238,chr22:45928638-45929038,chr22:45933631-45934031,chr22:45948478-45949037,chr22:45981001-45981401	13,15	BP00102:Signal transduction; BP00193:Developmental processes; BP00248:Mesoderm development
FBXL14	chr12:1642925-1643325,chr12:1672226-1672626,chr12:1685376-1685815	6
FBXL18	chr7:5468549-5468949	9
FBXL5	chr4:15589425-15589825,chr4:15603040-15603440,chr4:15655110-15655510,chr4:15655590-15655990	4,8
FBXL6	chr8:145582555-145582955	4
FBXO32	chr8:124507907-124508307,chr8:124525254-124525654,chr8:124529306-124529706,chr8:124552327-124552727,chr8:124553294-124553701	15
FBXO5	chr6:153304384-153304784,chr6:153305113-153305538	4
FCRLB	chr1:161695936-161696336	8	BP00102:Signal transduction
FEM1B	chr15:68575794-68576194,chr15:68576494-68577254,chr15:68577388-68577928,chr15:68578434-68578834,chr15:68579538-68579938	10
FEN1	chr11:61571263-61571783	13
FER1L4	chr20:34189318-34189718	14
FERMT2	chr14:53302160-53302560	8
FEZ2	chr2:36649445-36649845,chr2:36743345-36743745,chr2:36780675-36781075	3
FGF1	chr5:142000940-142001370,chr5:142024163-142024563,chr5:142024693-142025093,chr5:142092776-142093176	8	BP00102:Signal transduction; BP00111:Intracellular signaling cascade; BP00193:Developmental processes; BP00203:Cell cycle; BP00207:Cell cycle control; BP00224:Cell proliferation and differentiation; BP00274:Cell communication; hsa04810:Regulation of actin cytoskeleton; hsa05200:Pathways in cancer
FGF2	chr4:123685254-123685654,chr4:123685984-123686384,chr4:123686814-123687214,chr4:123704538-123705047,chr4:123749048-123749464	8	BP00102:Signal transduction; BP00111:Intracellular signaling cascade; BP00193:Developmental processes; BP00207:Cell cycle control; BP00224:Cell proliferation and differentiation; BP00274:Cell communication; hsa04810:Regulation of actin cytoskeleton; hsa05200:Pathways in cancer
FGF5	chr4:81186742-81187232,chr4:81187462-81187950,chr4:81187985-81188385,chr4:81189162-81190112,chr4:81215590-81215990,chr4:81216550-81216950	1	hsa04010:MAPK signaling pathway
FGF7	chr15:49715284-49715700,chr15:49716295-49716794,chr15:49731245-49731645,chr15:49771064-49771464,chr15:49791710-49792110,chr15:49792850-49793250,chr15:49794060-49794460,chr15:49796804-49797204,chr15:49912358-49912812,chr15:49913902-49914342,chr15:49915222-49915622	14	BP00102:Signal transduction; BP00103:Cell surface receptor mediated signal transduction; BP00111:Intracellular signaling cascade; BP00122:Ligand-mediated signaling; BP00193:Developmental processes; BP00224:Cell proliferation and differentiation; BP00274:Cell communication
FHL1	chrX:135275588-135275988,chrX:135278988-135279388,chrX:135290726-135291126	13,14	BP00193:Developmental processes; BP00248:Mesoderm development
FIBP	chr11:65656424-65657052	1
FILIP1L	chr3:99563686-99564086	1
FIZ1	chr19:56111291-56111691	4
FJX1	chr11:35639799-35640199	8
FKBP2	chr11:64009763-64010163	8
FKBP5	chr6:35535573-35535973	15	BP00102:Signal transduction; BP00148:Immunity and defense
FLCN	chr17:17139760-17140160	4	hsa05211:Renal cell carcinoma
FLG	chr1:152273345-152273745	4	BP00285:Cell structure and motility; BP00286:Cell structure
FLII	chr17:18139015-18139415,chr17:18139915-18140315,chr17:18145613-18146013,chr17:18161178-18161578,chr17:18164373-18164773	4,8	BP00193:Developmental processes; BP00242:Embryogenesis
FLNC	chr7:128470772-128471172,chr7:128471432-128471917,chr7:128476022-128476422,chr7:128480942-128481342	8	BP00285:Cell structure and motility; BP00286:Cell structure; BP00287:Cell motility; hsa04510:Focal adhesion
FLOT1	chr6:30710326-30711126,chr6:30711416-30711816	8	BP00224:Cell proliferation and differentiation
FMN2	chr1:240411336-240411916,chr1:240437466-240437866,chr1:240445746-240446146,chr1:240515026-240515426	1
FMNL3	chr12:50030521-50030940,chr12:50100033-50100433	9	BP00285:Cell structure and motility; BP00287:Cell motility
FMO6P	chr1:171110462-171111313,chr1:171111922-171112322	13
FN1	chr2:216220509-216220909,chr2:216236649-216237129,chr2:216266679-216267079,chr2:216279429-216279829,chr2:216325506-216325906,chr2:216326126-216326526,chr2:216522614-216523088,chr2:216523293-216523714,chr2:216557907-216558509,chr2:216565159-216565737,chr2:216637900-216638420,chr2:216746425-216746825,chr2:216749495-216749895	9	BP00275:Extracellular matrix protein-mediated signaling; BP00285:Cell structure and motility; BP00286:Cell structure; hsa04510:Focal adhesion; hsa04512:ECM-receptor interaction; hsa04810:Regulation of actin cytoskeleton
FNDC1	chr6:159591879-159592361,chr6:159592613-159593013,chr6:159593031-159593431,chr6:159600891-159601301,chr6:159615579-159615979,chr6:159623839-159624239,chr6:159627981-159628381,chr6:159653919-159654319,chr6:159667389-159667789	14
FNDC3B	chr3:171919099-171919579,chr3:172096609-172097009	9
FONG	chr2:200715382-200715797	14
FOS	chr14:75745362-75745762	15	BP00148:Immunity and defense
FOSL2	chr2:28565509-28565909,chr2:28618170-28618570	13
FOXO1	chr13:40635739-40636139,chr13:40810475-40810875,chr13:40976369-40976769,chr13:41171375-41171775,chr13:41176795-41177195,chr13:41240475-41240875	15	BP00001:Carbohydrate metabolism; BP00102:Signal transduction; BP00103:Cell surface receptor mediated signal transduction; BP00110:Other receptor mediated signaling pathway; BP00285:Cell structure and motility; hsa04910:Insulin signaling pathway
FOXO3	chr6:108881129-108881529,chr6:108943804-108944204,chr6:108944260-108944660,chr6:108974940-108975444	13	BP00102:Signal transduction; BP00103:Cell surface receptor mediated signal transduction; BP00193:Developmental processes; BP00207:Cell cycle control; BP00248:Mesoderm development; hsa05213:Endometrial cancer
FOXP1	chr3:70878265-70878665,chr3:70999053-70999453,chr3:71071847-71072347,chr3:71105947-71106347,chr3:71112835-71113387,chr3:71150227-71150627,chr3:71151093-71151493,chr3:71560113-71560513,chr3:71585413-71585813,chr3:71586099-71586853,chr3:71590960-71591360,chr3:71591587-71592150,chr3:71600423-71600823,chr3:71629923-71630323,chr3:71636950-71637350,chr3:71637640-71638040,chr3:71638160-71639220,chr3:716…	8	BP00102:Signal transduction; BP00193:Developmental processes; BP00207:Cell cycle control; BP00224:Cell proliferation and differentiation; BP00242:Embryogenesis; BP00274:Cell communication; BP00285:Cell structure and motility; BP00286:Cell structure
FOXS1	chr20:30425784-30426184,chr20:30428734-30429134,chr20:30430677-30431284,chr20:30433147-30433574	10	BP00102:Signal transduction; BP00193:Developmental processes; BP00248:Mesoderm development; BP00274:Cell communication; BP00286:Cell structure
FPGS	chr9:130565916-130566394,chr9:130578296-130578696	1,4
FRMD6	chr14:52013306-52013706,chr14:52021248-52022008,chr14:52187122-52187522	8
FST	chr5:52778421-52779027	4
FTH1	chr11:61733026-61733426,chr11:61734266-61734666,chr11:61792858-61793258	13
FTSJ1	chrX:48345835-48346235	8
FUS	chr16:31191716-31192165	4
FXYD5	chr19:35661180-35661780,chr19:35663270-35663670	8
FYN	chr6:112045359-112045759,chr6:112066359-112066759,chr6:112069139-112069539,chr6:112096869-112097269,chr6:112126409-112126809,chr6:112163239-112163639,chr6:112183826-112184226,chr6:112192716-112193116,chr6:112193746-112194146,chr6:112194446-112194846	13,14	BP00064:Protein phosphorylation; BP00102:Signal transduction; BP00111:Intracellular signaling cascade; BP00193:Developmental processes; BP00207:Cell cycle control; BP00224:Cell proliferation and differentiation; BP00248:Mesoderm development
FZD1	chr7:90895394-90896059,chr7:90899399-90899799,chr7:90901439-90901839,chr7:90902059-90902459	14
FZD8	chr10:35924411-35924811,chr10:36638481-36638881,chr10:36778649-36779049,chr10:36779359-36779759,chr10:36783299-36783699	8	hsa04916:Melanogenesis; hsa05200:Pathways in cancer
FZR1	chr19:3505732-3506148,chr19:3526095-3526495,chr19:3552915-3553315	4	BP00203:Cell cycle; BP00207:Cell cycle control; hsa04110:Cell cycle
GABARAPL1	chr12:10365289-10365786	15	BP00285:Cell structure and motility
GADD45B	chr19:2477726-2478126,chr19:2544002-2544402,chr19:2634490-2635010	13	BP00102:Signal transduction; BP00111:Intracellular signaling cascade; BP00114:MAPKKK cascade; BP00207:Cell cycle control
GALE	chr1:24126016-24126422	4
GALNT10	chr5:153569301-153569767,chr5:153570541-153570941,chr5:153600167-153600567,chr5:153600767-153601167,chr5:153649931-153650331	8	BP00063:Protein modification
GALNT5	chr2:158114053-158114476	4	BP00009:Other polysaccharide metabolism; BP00063:Protein modification; BP00067:Protein glycosylation
GALNT6	chr12:51785252-51785652,chr12:51787984-51788422	1,4	BP00009:Other polysaccharide metabolism; BP00063:Protein modification; BP00067:Protein glycosylation
GALNTL2	chr3:16165887-16166287,chr3:16177634-16178177,chr3:16216628-16217028,chr3:16275788-16276188	15	BP00001:Carbohydrate metabolism
GARS	chr7:30635597-30636169,chr7:30643072-30643472,chr7:30644672-30645072,chr7:30649692-30650092,chr7:30668927-30669327,chr7:30675572-30675972,chr7:30685262-30685662,chr7:30686432-30686991	10	BP00074:Amino acid activation; hsa00970:Aminoacyl-tRNA biosynthesis
GAS1	chr9:89410723-89411137,chr9:89557755-89558732,chr9:89560295-89560695,chr9:89560825-89562055,chr9:89562205-89563075,chr9:89563375-89563775,chr9:89593809-89594209,chr9:89597489-89597923,chr9:89597973-89598373,chr9:89598649-89599123,chr9:89678072-89678632,chr9:89738696-89739096,chr9:89894426-89894966,chr9:89895043-89895476	13
GAS2L3	chr12:100967264-100967664	1
GATA2	chr3:128207912-128208312	1
GATA6	chr18:19749355-19749766,chr18:19749946-19751036,chr18:19751155-19751555,chr18:19765181-19765581,chr18:19768551-19768951,chr18:19785561-19785961	8	BP00193:Developmental processes
GBA	chr1:155194521-155194921,chr1:155214548-155215007	4,9	hsa04142:Lysosome
GBP3	chr1:89488261-89488681	8
GCLC	chr6:53357891-53358391,chr6:53361171-53361571,chr6:53379591-53379991,chr6:53389095-53389495,chr6:53411955-53412355	13,14	BP00079:Sulfur redox metabolism; BP00101:Sulfur metabolism; hsa00480:Glutathione metabolism
GCLM	chr1:94429249-94429720	13	BP00079:Sulfur redox metabolism; BP00101:Sulfur metabolism; hsa00480:Glutathione metabolism
GDF15	chr19:18496788-18497256,chr19:18497559-18497959,chr19:18499276-18499676,chr19:18500796-18501489	10	BP00193:Developmental processes; BP00201:Skeletal development; BP00248:Mesoderm development
GDNF	chr5:37810243-37810742,chr5:37810913-37811313,chr5:37811353-37811753,chr5:37811993-37812393,chr5:37825323-37825723,chr5:37838163-37838563,chr5:37839852-37840253	1
GFPT1	chr2:69535183-69535583,chr2:69542073-69542473,chr2:69612623-69613023	10,9	hsa00250:Alanine, aspartate and glutamate metabolism
GINS1	chr20:25388089-25388592	1
GIP	chr17:47039104-47039504,chr17:47049855-47050255	8
GJC1	chr17:42906965-42907388	1
GK5	chr3:141873697-141874097,chr3:141891344-141891744,chr3:141928891-141929291,chr3:141943708-141944108	13
GLCCI1	chr7:8008770-8009170,chr7:8085210-8085610	13
GLDC	chr9:6498616-6499016,chr9:6511646-6512046,chr9:6528093-6528493	4
GLI2	chr2:121516531-121517051,chr2:121621296-121621696,chr2:121695180-121695580,chr2:121734051-121734451	8	BP00193:Developmental processes; BP00242:Embryogenesis; hsa05200:Pathways in cancer
GLIPR1	chr12:75874379-75874789	4
GLIS3	chr9:3864173-3864573,chr9:3874632-3875032,chr9:3880642-3881042,chr9:3916689-3917293,chr9:4214291-4214691,chr9:4247911-4248311,chr9:4298311-4298765,chr9:4299311-4299731	13
GLRX	chr5:95144211-95144611,chr5:95147806-95148353,chr5:95148394-95148794,chr5:95171176-95171876,chr5:95172042-95172442,chr5:95194346-95194991,chr5:95194542-95194942,chr5:95199016-95199521,chr5:95213981-95214381,chr5:95215366-95215766,chr5:95217566-95217966,chr5:95244046-95244446,chr5:95294171-95294571,chr5:95294751-95295481,chr5:95294826-95295226,chr5:95295311-95295711,chr5:95296426-95296846	13,15	BP00079:Sulfur redox metabolism; BP00101:Sulfur metabolism
GLS	chr2:191514751-191515151,chr2:191656292-191656692,chr2:191723471-191723878,chr2:191723921-191724548,chr2:191724908-191725308,chr2:191746161-191746840,chr2:191806459-191806859	8
GLT25D2	chr1:183775388-183775788,chr1:183925541-183925941	15
GLUL	chr1:182350836-182351596,chr1:182360217-182360659	13
GM2A	chr5:150593595-150593995,chr5:150602712-150603112	15
GNAI2	chr3:50274298-50274865,chr3:50283998-50284437	8	BP00102:Signal transduction; hsa04360:Axon guidance; hsa04530:Tight junction; hsa04670:Leukocyte transendothelial migration; hsa04916:Melanogenesis
GNB1	chr1:1746611-1747011	8	BP00102:Signal transduction
GNG13	chr16:850237-850637	3
GOLGA2	chr9:131016453-131016853,chr9:131028053-131028453,chr9:131029453-131029853,chr9:131030463-131030863	4,8
GOLGA3	chr12:133401655-133402055,chr12:133404434-133404894	4,8
GORASP2	chr2:171812495-171812895	9
GOT1	chr10:101154175-101154935	10	BP00013:Amino acid metabolism; hsa00250:Alanine, aspartate and glutamate metabolism
GP5	chr3:194106997-194107397	8	BP00124:Cell adhesion; hsa04640:Hematopoietic cell lineage
GPC1	chr2:241190614-241191014,chr2:241327172-241327572,chr2:241372796-241373210,chr2:241373389-241373926,chr2:241374069-241374830,chr2:241377370-241377770,chr2:241403520-241403920,chr2:241404010-241404410,chr2:241404520-241404920,chr2:241407460-241408790,chr2:241408796-241409276,chr2:241411460-241411860	15
GPD1L	chr3:32148029-32148431,chr3:32218596-32218996	15	BP00019:Lipid, fatty acid and steroid metabolism
GPER	chr7:1127597-1128055	8	BP00102:Signal transduction
GPNMB	chr7:23286193-23286656,chr7:23287147-23287547	4
GPR1	chr2:207076561-207076967,chr2:207077875-207078301	9	BP00285:Cell structure and motility; BP00287:Cell motility
GPR143	chrX:9434099-9434499	13
GPR162	chr12:6937158-6937558	8
GPR17	chr2:128390211-128390611,chr2:128391308-128391728,chr2:128395292-128395692	8	BP00102:Signal transduction
GPR172A	chr8:145582431-145582882	8	BP00102:Signal transduction
GPR176	chr15:40211015-40211456	4
GPR68	chr14:91709894-91710377,chr14:91709967-91710367,chr14:91710774-91711295,chr14:91719473-91719873	4,8	BP00102:Signal transduction
GPRC5A	chr12:12972488-12972888,chr12:13030495-13030895,chr12:13043970-13044716	1
GPT2	chr16:46917200-46917600,chr16:46966720-46967120	10	BP00013:Amino acid metabolism; hsa00250:Alanine, aspartate and glutamate metabolism
GPX3	chr5:150400616-150401016,chr5:150401156-150402246	15	BP00019:Lipid, fatty acid and steroid metabolism; BP00148:Immunity and defense
GRB10	chr7:50657089-50657489,chr7:50797604-50798004,chr7:50798144-50798544	8	BP00102:Signal transduction
GREM2	chr1:240585076-240585476,chr1:240672476-240673076	1
GRIP2	chr3:14533324-14533724,chr3:14534064-14534464,chr3:14534654-14535054,chr3:14535774-14536174	13
GSN	chr9:124049684-124050084,chr9:124057605-124058005,chr9:124091085-124091485	15	BP00285:Cell structure and motility
GSR	chr8:30580600-30581000	15	BP00289:Other metabolism
GTF3A	chr13:27936168-27936568,chr13:27998711-27999130,chr13:27999850-28000250	4
GTPBP2	chr6:43576081-43576481	9
H2AFV	chr7:44887059-44887459,chr7:44887889-44888319,chr7:44915998-44916398	4	BP00273:Chromatin packaging and remodeling; hsa05322:Systemic lupus erythematosus
H6PD	chr1:9203229-9203629,chr1:9300917-9301317,chr1:9302467-9302867	15	BP00001:Carbohydrate metabolism
HAPLN1	chr5:82939649-82940049,chr5:82949409-82949809,chr5:83221543-83221943,chr5:83251703-83252103,chr5:83430882-83431282,chr5:83530989-83531389	4
HAS1	chr19:52211036-52211436,chr19:52212806-52213206,chr19:52214946-52215346,chr19:52226997-52227446,chr19:52228046-52228446,chr19:52241212-52241612,chr19:52253837-52254237	13
HAS2	chr8:122621719-122622258,chr8:123446629-123447029	6
HAUS8	chr19:17186001-17186401,chr19:17186891-17187291	1
HCFC1	chrX:153218888-153219288,chrX:153238336-153238736	1
HDAC4	chr2:239782075-239782475,chr2:239783755-239784155,chr2:239793285-239793685,chr2:239965816-239966216,chr2:239968716-239969116,chr2:239998606-239999006,chr2:240009496-240009916,chr2:240020086-240020486,chr2:240037356-240037756,chr2:240038786-240039186,chr2:240039576-240039976,chr2:240083886-240084286,chr2:240152752-240153152,chr2:240168062-240168462,chr2:240171952-240172352,chr2:240175172-240175572…	13,15	BP00179:Apoptosis; BP00207:Cell cycle control
HELLS	chr10:96305437-96305841	1
HERC4	chr10:69675000-69675400,chr10:69774409-69774809,chr10:69807293-69807693	1
HERPUD1	chr16:56981702-56982102	11
HEY2	chr6:126070677-126071077	11
HIF1A	chr14:61943587-61944097,chr14:61944380-61944780,chr14:61978691-61979129,chr14:62010098-62010498,chr14:62035570-62035970,chr14:62036690-62037540,chr14:62070677-62071503,chr14:62087203-62087757,chr14:62128374-62128774	13	BP00193:Developmental processes
HILS1	chr17:48251023-48251423,chr17:48258579-48258979,chr17:48270363-48270763	10
HIP1	chr7:75192271-75192671,chr7:75201861-75202575,chr7:75254551-75254951,chr7:75317769-75318329,chr7:75340889-75341289,chr7:75367981-75368413	13
HIPK2	chr7:139244102-139244848,chr7:139260133-139260533,chr7:139280573-139281013,chr7:139425012-139425412,chr7:139474302-139474852,chr7:139475645-139476102	13	BP00064:Protein phosphorylation
HIST1H1A	chr6:26020873-26021374,chr6:26021694-26022133	1
HIST1H1B	chr6:27835073-27835516	4	BP00273:Chromatin packaging and remodeling
HIST1H2AE	chr6:26216636-26217376	1	hsa05322:Systemic lupus erythematosus
HIST1H2AL	chr6:27833263-27833663,chr6:27833881-27834573	4	BP00273:Chromatin packaging and remodeling; hsa05322:Systemic lupus erythematosus
HIST1H2BB	chr6:26043717-26044416,chr6:26045972-26046372	4	hsa05322:Systemic lupus erythematosus
HIST1H2BC	chr6:26123209-26123719	1	hsa05322:Systemic lupus erythematosus
HIST1H2BI	chr6:26271343-26271753	4	hsa05322:Systemic lupus erythematosus
HIST1H2BJ	chr6:27100664-27101064	4	hsa05322:Systemic lupus erythematosus
HIST1H2BM	chr6:27781599-27781999,chr6:27782685-27783085	4	hsa05322:Systemic lupus erythematosus
HIST1H2BO	chr6:27861591-27861991,chr6:27862191-27862591	3
HIST1H3A	chr6:26017743-26018174	1	hsa05322:Systemic lupus erythematosus
HIST1H3B	chr6:26031504-26031904,chr6:26033134-26033534	4	BP00273:Chromatin packaging and remodeling; hsa05322:Systemic lupus erythematosus
HIST1H3C	chr6:26043706-26044282,chr6:26045447-26045887	1	hsa05322:Systemic lupus erythematosus
HIST1H3D	chr6:26197242-26197664,chr6:26199272-26200002	1	hsa05322:Systemic lupus erythematosus
HIST1H3G	chr6:26272972-26273383	4	BP00273:Chromatin packaging and remodeling; hsa05322:Systemic lupus erythematosus
HIST1H3H	chr6:27774903-27775303	1	hsa05322:Systemic lupus erythematosus
HIST1H3J	chr6:27857591-27857991,chr6:27858347-27858751,chr6:27860081-27860481,chr6:27861033-27861461,chr6:27862901-27863301	1,4	BP00273:Chromatin packaging and remodeling; hsa05322:Systemic lupus erythematosus
HIST1H4A	chr6:26021674-26022074,chr6:26022184-26022584	4	BP00273:Chromatin packaging and remodeling; hsa05322:Systemic lupus erythematosus
HIST1H4H	chr6:26286458-26286904,chr6:26286499-26286899,chr6:26313171-26313571,chr6:26322914-26323314	1,4	BP00273:Chromatin packaging and remodeling; hsa05322:Systemic lupus erythematosus
HK2	chr2:75060681-75061081,chr2:75087518-75087918,chr2:75136071-75136638,chr2:75143508-75143908	13	hsa04930:Type II diabetes mellitus
HMCN1	chr1:185942131-185942531	10	BP00124:Cell adhesion; BP00193:Developmental processes
HMGA1	chr6:34191478-34191878	4	BP00203:Cell cycle; BP00206:Chromosome segregation; BP00282:Mitosis
HMGA2	chr12:65782705-65783105,chr12:65864733-65865236,chr12:65959253-65959653,chr12:66135583-66136193,chr12:66218541-66219040,chr12:66219690-66220410	4	BP00203:Cell cycle; BP00206:Chromosome segregation; BP00282:Mitosis
HMGB2	chr4:174246893-174247293,chr4:174247997-174248423,chr4:174254571-174254971,chr4:174256245-174256757	4,6
HN1	chr17:73149325-73149725,chr17:73150702-73151102	6
HN1L	chr16:1728454-1728854	4
HNRNPUL1	chr19:41731663-41732408,chr19:41734433-41734833,chr19:41767507-41767907	4
HP1BP3	chr1:21058701-21059186	6
HRH1	chr3:11138234-11138634,chr3:11196929-11197329,chr3:11237614-11238014	8	BP00102:Signal transduction; hsa04020:Calcium signaling pathway
HS6ST1	chr2:129057724-129058124	13
HSD11B1	chr1:209878045-209878445	15	BP00289:Other metabolism
HSD3B7	chr16:31000891-31001291,chr16:31009303-31009709	8	BP00193:Developmental processes
HSP90AA1	chr14:102746430-102747200	3	hsa04914:Progesterone-mediated oocyte maturation
HSPA5	chr9:127997091-127997640	11	BP00060:Protein metabolism and modification
HSPA8	chr11:122932085-122932485,chr11:122932152-122932552,chr11:122961362-122961762,chr11:122992962-122993362,chr11:122993570-122993970,chr11:123024840-123025240,chr11:123044950-123045350,chr11:123058682-123059082,chr11:123063202-123063602,chr11:123064552-123064952	1,6	hsa04010:MAPK signaling pathway
HSPA9	chr5:137909647-137910047	9
HSPB2	chr11:111783700-111784304,chr11:111784939-111785339,chr11:111789509-111789909	8
HSPB8	chr12:119617194-119617594,chr12:119618214-119618614	1
HTR6	chr1:19971177-19971577,chr1:19971614-19972014,chr1:19986114-19986598,chr1:19990925-19991325	15	BP00102:Signal transduction; BP00103:Cell surface receptor mediated signal transduction
HTRA4	chr8:38759694-38760154,chr8:38763654-38764054,chr8:38771016-38771416,chr8:38782698-38783098,chr8:38783376-38783776,chr8:38793989-38794448,chr8:38823646-38824080,chr8:38831590-38831990	14	BP00102:Signal transduction; BP00111:Intracellular signaling cascade; BP00193:Developmental processes; BP00224:Cell proliferation and differentiation; BP00274:Cell communication
ID4	chr6:19838056-19838499,chr6:19839039-19839439,chr6:19841416-19841816,chr6:19842566-19843149	13	hsa04350:TGF-beta signaling pathway
IER3	chr6:30720279-30720767,chr6:30737116-30737516,chr6:30749443-30749843,chr6:30787970-30788390	8
IFI16	chr1:158970228-158970744,chr1:158982378-158982778	12
IFIT1	chr10:91152204-91152663	9
IFIT3	chr10:91087628-91088028	8
IFNGR1	chr6:137539681-137540081,chr6:137561023-137561423	13	BP00102:Signal transduction; BP00103:Cell surface receptor mediated signal transduction; BP00107:Cytokine and chemokine mediated signaling pathway; BP00111:Intracellular signaling cascade; BP00114:MAPKKK cascade; hsa04630:Jak-STAT signaling pathway
IGF2	chr11:2118311-2118849,chr11:2149586-2149986,chr11:2158236-2158665	14	BP00102:Signal transduction; BP00103:Cell surface receptor mediated signal transduction; BP00122:Ligand-mediated signaling; BP00193:Developmental processes; BP00224:Cell proliferation and differentiation; BP00274:Cell communication
IGFBP2	chr2:217530463-217530863,chr2:217535473-217535873	13	BP00102:Signal transduction; BP00270:Growth factor homeostasis
IGFBP3	chr7:45949140-45949540,chr7:45949870-45950270,chr7:45950750-45951150,chr7:45960619-45961045,chr7:45983636-45984036,chr7:46018005-46018405,chr7:46184770-46185170,chr7:46186270-46186670,chr7:46526398-46526798,chr7:46803503-46803903	8	BP00102:Signal transduction; BP00274:Cell communication; BP00275:Extracellular matrix protein-mediated signaling
IGFBP4	chr17:38599994-38600394,chr17:38601484-38601884,chr17:38616304-38616704,chr17:38619387-38619787,chr17:38622614-38623167,chr17:38623597-38624064,chr17:38625864-38626264,chr17:38626514-38626914,chr17:38627154-38627554,chr17:38627644-38628044	13	BP00102:Signal transduction; BP00270:Growth factor homeostasis
IGFBP5	chr2:217535953-217536353,chr2:217537673-217538073,chr2:217557823-217558223,chr2:217558903-217559623,chr2:217560037-217560453	15	BP00102:Signal transduction; BP00275:Extracellular matrix protein-mediated signaling
IGFBP6	chr12:53491495-53491961	8	BP00102:Signal transduction; BP00274:Cell communication; BP00275:Extracellular matrix protein-mediated signaling
IGFBP7	chr4:57955721-57956121,chr4:57975914-57976314	8	BP00224:Cell proliferation and differentiation
IKBKB	chr8:42129044-42129444	6	hsa04010:MAPK signaling pathway; hsa04662:B cell receptor signaling pathway; hsa04722:Neurotrophin signaling pathway; hsa04920:Adipocytokine signaling pathway; hsa05200:Pathways in cancer
IL11	chr19:55875340-55876020,chr19:55881110-55881510,chr19:55881520-55882244	8	hsa04640:Hematopoietic cell lineage
IL16	chr15:81456669-81457069,chr15:81474922-81475333	14
IL17RC	chr3:9956748-9957222,chr3:9957978-9958378,chr3:9958528-9959027	15
IL18R1	chr2:102972075-102972475	15	BP00102:Signal transduction; BP00103:Cell surface receptor mediated signal transduction; BP00107:Cytokine and chemokine mediated signaling pathway
IL1R1	chr2:102640844-102641244,chr2:102641334-102641734,chr2:102653404-102653804,chr2:102666162-102666562,chr2:102666642-102667042,chr2:102679591-102679991,chr2:102680006-102681096,chr2:102686692-102687210,chr2:102738707-102739107,chr2:102758850-102759484	15	BP00102:Signal transduction; BP00103:Cell surface receptor mediated signal transduction; BP00107:Cytokine and chemokine mediated signaling pathway; BP00148:Immunity and defense
IL1R2	chr2:102471212-102471612,chr2:102527552-102527952,chr2:102529842-102530242,chr2:102534795-102535195,chr2:102535265-102535665,chr2:102572942-102573342,chr2:102573902-102574302,chr2:102577333-102577822,chr2:102577823-102578223,chr2:102578433-102578882,chr2:102642034-102642614,chr2:102642854-102643254,chr2:102643564-102643964,chr2:102649084-102649738,chr2:102649868-102650308,chr2:102650468-102650868…	13,15	BP00102:Signal transduction; BP00103:Cell surface receptor mediated signal transduction; BP00107:Cytokine and chemokine mediated signaling pathway
IL1RL2	chr2:102804238-102804638,chr2:102843970-102844370	15	BP00102:Signal transduction; BP00103:Cell surface receptor mediated signal transduction; BP00107:Cytokine and chemokine mediated signaling pathway; BP00148:Immunity and defense
IL21R	chr16:27376860-27377460,chr16:27378120-27378600	8
IL22RA2	chr6:137514523-137514943,chr6:137516440-137516840,chr6:137516970-137517370	13	BP00102:Signal transduction; BP00103:Cell surface receptor mediated signal transduction; BP00107:Cytokine and chemokine mediated signaling pathway; hsa04630:Jak-STAT signaling pathway
IL4I1	chr19:50412336-50412736	4
IL6	chr7:22609520-22609920,chr7:22629870-22630270,chr7:22702226-22702626,chr7:22702816-22703216,chr7:22707066-22707466,chr7:22757955-22758715,chr7:22766366-22767196,chr7:22770925-22771325,chr7:22772105-22772505,chr7:22861057-22861457	10	BP00102:Signal transduction; BP00122:Ligand-mediated signaling; BP00274:Cell communication; hsa04060:Cytokine-cytokine receptor interaction
IL6ST	chr5:55776494-55776921	11
ILF3	chr19:10772983-10773383	1
IMPA2	chr18:11946942-11947342,chr18:12038253-12038653,chr18:12038713-12039223	14
INCENP	chr11:61891307-61892103,chr11:61917842-61918242	1
INF2	chr14:105147043-105147676	4
INHBA	chr7:41722534-41722934,chr7:41732908-41733308,chr7:41735194-41735594,chr7:41735668-41736248,chr7:41737988-41738414,chr7:41738458-41738858,chr7:41739094-41739588,chr7:41740388-41741318,chr7:41742444-41742853,chr7:41918593-41918993,chr7:41920013-41920413,chr7:41925273-41925673,chr7:41925703-41926103,chr7:41926533-41926933,chr7:41951827-41952227,chr7:41955080-41955840,chr7:41955960-41956377	8	BP00102:Signal transduction; BP00193:Developmental processes; BP00224:Cell proliferation and differentiation
INO80	chr15:41264420-41264841	4	BP00273:Chromatin packaging and remodeling
INPP5A	chr10:134234880-134235280	4
INSIG1	chr7:155065065-155065465,chr7:155102354-155102754,chr7:155104362-155104762	13
IPO5	chr13:98639041-98639441,chr13:98646951-98647351	8
IPO7	chr11:9432755-9433535	1
IQGAP1	chr15:90905375-90905775,chr15:90906055-90906455,chr15:90992941-90993341	8	BP00102:Signal transduction; BP00111:Intracellular signaling cascade; BP00207:Cell cycle control; hsa04810:Regulation of actin cytoskeleton
IRF1	chr5:131773443-131773875,chr5:131775095-131775495,chr5:131793086-131793486,chr5:131814900-131815300,chr5:131815680-131816080	10	BP00281:Oncogenesis
IRS1	chr2:227663447-227663847,chr2:227673708-227674108	6	hsa04722:Neurotrophin signaling pathway; hsa04920:Adipocytokine signaling pathway
IRS2	chr13:110402105-110402853,chr13:110402855-110403933	13	BP00102:Signal transduction; BP00103:Cell surface receptor mediated signal transduction; BP00107:Cytokine and chemokine mediated signaling pathway; BP00111:Intracellular signaling cascade; BP00114:MAPKKK cascade; hsa04930:Type II diabetes mellitus
ISG20	chr15:89180016-89180501	4
ISLR	chr15:74465135-74465619,chr15:74469290-74469690,chr15:74471699-74472325	10	BP00102:Signal transduction
ITGA10	chr1:145542502-145542913,chr1:145543341-145543865,chr1:145549071-145549471,chr1:145549951-145550455	15
ITGA11	chr15:68717167-68717567,chr15:68722057-68722528,chr15:68723308-68723737,chr15:68723747-68724147,chr15:68757007-68757407,chr15:68770619-68771019,chr15:68771192-68771592,chr15:68771863-68772263,chr15:68772639-68773039,chr15:68816897-68817361,chr15:68817497-68817897,chr15:68818101-68818697,chr15:68828420-68829437,chr15:68845160-68845560	10	BP00124:Cell adhesion; hsa04510:Focal adhesion; hsa04512:ECM-receptor interaction
ITGA2	chr5:52100972-52101372	4	hsa04510:Focal adhesion; hsa04810:Regulation of actin cytoskeleton; hsa05200:Pathways in cancer; hsa05410:Hypertrophic cardiomyopathy (HCM); hsa05414:Dilated cardiomyopathy
ITGA3	chr17:48132823-48133687,chr17:48133787-48134187,chr17:48134237-48134637,chr17:48138437-48138837,chr17:48140037-48140437	8	BP00124:Cell adhesion; hsa04510:Focal adhesion; hsa04640:Hematopoietic cell lineage; hsa04810:Regulation of actin cytoskeleton; hsa05200:Pathways in cancer; hsa05412:Arrhythmogenic right ventricular cardiomyopathy (ARVC); hsa05414:Dilated cardiomyopathy
ITGB1	chr10:33179441-33179841,chr10:33179445-33179965,chr10:33180185-33180791,chr10:33182288-33182831,chr10:33208712-33209112,chr10:33215292-33215940,chr10:33247815-33248472,chr10:33250875-33251342,chr10:33270035-33270544,chr10:33272184-33272584,chr10:33294229-33294769,chr10:33463494-33463894,chr10:33536319-33536719,chr10:33562299-33562754,chr10:33568524-33568924,chr10:33604379-33604779	4,8	BP00102:Signal transduction; BP00120:Cell adhesion-mediated signaling; BP00124:Cell adhesion; BP00274:Cell communication; BP00275:Extracellular matrix protein-mediated signaling; BP00285:Cell structure and motility; BP00287:Cell motility; hsa04360:Axon guidance; hsa04510:Focal adhesion; hsa04514:Cell adhesion molecules (CAMs); hsa04670:Leukocyte transendothelial migration; hsa04810:Regulation of …
ITGB1BP1	chr2:9530508-9530908,chr2:9547518-9547918	8
ITGB3	chr17:45330903-45331543,chr17:45335153-45335553,chr17:45354202-45354602,chr17:45356852-45357252	8,9	BP00102:Signal transduction; BP00120:Cell adhesion-mediated signaling; BP00124:Cell adhesion; BP00274:Cell communication; BP00285:Cell structure and motility; BP00287:Cell motility; hsa04510:Focal adhesion; hsa04512:ECM-receptor interaction; hsa04640:Hematopoietic cell lineage; hsa04810:Regulation of actin cytoskeleton; hsa05412:Arrhythmogenic right ventricular cardiomyopathy (ARVC); hsa05414:Dil…
ITPKC	chr19:41223107-41223538,chr19:41224867-41225267	15
ITPR3	chr6:33581725-33582125,chr6:33589450-33589850,chr6:33595660-33596060,chr6:33602120-33602520,chr6:33626035-33626435	8	BP00102:Signal transduction; BP00111:Intracellular signaling cascade; BP00112:Calcium mediated signaling; BP00173:Muscle contraction; BP00285:Cell structure and motility; BP00287:Cell motility; hsa04020:Calcium signaling pathway; hsa04070:Phosphatidylinositol signaling system
IVNS1ABP	chr1:185259656-185260555,chr1:185261876-185262276,chr1:185264086-185264486,chr1:185615502-185615902	4,8
JAG1	chr20:10427695-10428095,chr20:10575079-10575479,chr20:10600358-10600758,chr20:10603228-10603918,chr20:10617022-10617422,chr20:10617642-10618042,chr20:10651426-10651826,chr20:10652175-10652664,chr20:10653274-10653826,chr20:10653865-10654265,chr20:11125626-11126026	10	BP00193:Developmental processes
JAK2	chr9:4986249-4986649,chr9:5111913-5112313	12	BP00285:Cell structure and motility
JDP2	chr14:75904249-75904649,chr14:75946709-75947473	10	BP00281:Oncogenesis
JUN	chr1:59369101-59369501	6	BP00031:Nucleoside, nucleotide and nucleic acid metabolism; BP00203:Cell cycle; BP00207:Cell cycle control; hsa04010:MAPK signaling pathway; hsa04310:Wnt signaling pathway; hsa04662:B cell receptor signaling pathway; hsa04722:Neurotrophin signaling pathway; hsa05200:Pathways in cancer
KANK1	chr9:694617-695034	4
KATNB1	chr16:57789497-57789977,chr16:57820439-57820839	8
KAZALD1	chr10:102801782-102802573,chr10:102826984-102827447	8	BP00224:Cell proliferation and differentiation
KAZN	chr1:14076106-14076506,chr1:14116287-14116687,chr1:14122477-14122877,chr1:14127510-14127910,chr1:14925057-14925519,chr1:14925872-14926272	6
KCNA7	chr19:49575171-49575571	8
KCNE4	chr2:223770687-223771087,chr2:223921524-223921924,chr2:223936735-223937135,chr2:223964980-223965380	14
KCNG1	chr20:49628739-49629139	11
KCNH1	chr1:211307179-211307579	13	BP00102:Signal transduction
KCNK2	chr1:215016410-215016810,chr1:215130774-215131211,chr1:215162633-215163033,chr1:215178670-215179270,chr1:215221890-215222290	4
KCNK7	chr11:65362415-65363175	8
KCNMA1	chr10:78923660-78924149,chr10:79050090-79050490,chr10:79050510-79051100,chr10:79110450-79110960,chr10:79111020-79111460,chr10:79115780-79116180,chr10:79117460-79117860,chr10:79150960-79151360,chr10:79151470-79151870,chr10:79152510-79152910,chr10:79177460-79177860,chr10:79178040-79178440,chr10:79178830-79179230,chr10:79225670-79226070,chr10:79228590-79228990,chr10:79261210-79261610,chr10:79265170-…	8	BP00173:Muscle contraction
KCNN4	chr19:44284821-44285221,chr19:44285281-44285681,chr19:44288561-44288961,chr19:44289341-44289741	8
KCTD12	chr13:77452124-77452524,chr13:77453664-77454204,chr13:77455954-77456354,chr13:77457464-77457864,chr13:77457934-77458661,chr13:77459281-77459857,chr13:77460027-77460471	14
KCTD15	chr19:34300668-34301068	10
KCTD4	chr13:45768253-45768653,chr13:45885324-45886094	1
KIAA0100	chr17:26973198-26973598	4
KIAA0101	chr15:64673411-64673815	3
KIAA0182	chr16:85355476-85355950,chr16:85549370-85549770,chr16:85557040-85557440,chr16:85647690-85648090	6	BP00031:Nucleoside, nucleotide and nucleic acid metabolism
KIAA0195	chr17:73495403-73495803	4
KIAA0247	chr14:70186055-70186535	13
KIAA0284	chr14:105292489-105292999	4
KIAA0368	chr9:114134618-114135018,chr9:114178878-114179278,chr9:114183078-114183478,chr9:114213938-114214338,chr9:114220138-114220538,chr9:114245031-114245711	15
KIAA0415	chr7:4722820-4723220	9
KIAA0513	chr16:85051527-85051927,chr16:85096378-85096778,chr16:85127906-85128306,chr16:85236079-85236558	15
KIAA1199	chr15:81071522-81071965,chr15:81081630-81082030,chr15:81092932-81093332,chr15:81225430-81225842,chr15:81244320-81244720	4
KIAA1609	chr16:84511793-84512193	1
KIF11	chr10:94416022-94416422	1
KIF18A	chr11:28129402-28129802	1
KIF18B	chr17:43000887-43001287,chr17:43001307-43001707	3
KIF2C	chr1:45187169-45187613	3
KIF7	chr15:90158049-90158799,chr15:90162889-90163562,chr15:90190472-90190872	15	BP00285:Cell structure and motility
KIFC3	chr16:57791147-57791547,chr16:57820189-57820589,chr16:57835218-57835689	1,4	BP00285:Cell structure and motility; BP00286:Cell structure
KLC3	chr19:45850902-45851302,chr19:45851552-45851952	4
KLF10	chr8:103740698-103741098,chr8:103741608-103742008	9
KLF15	chr3:126061798-126062198,chr3:126073517-126073917,chr3:126073948-126074348,chr3:126074747-126075218,chr3:126159329-126159729	15
KLF16	chr19:1855106-1855828	4
KLF2	chr19:16435589-16435989,chr19:16439591-16440171	4
KLF4	chr9:110251573-110251973,chr9:110400254-110400700,chr9:110401120-110401520	8	BP00193:Developmental processes
KLF6	chr10:3977357-3977757,chr10:4077265-4077665,chr10:4289265-4289665	9
KLF9	chr9:72992601-72993001,chr9:72993211-72993611,chr9:72997770-72998170,chr9:73028930-73029351,chr9:73033095-73033495,chr9:73036155-73036555,chr9:73095529-73095929,chr9:73182394-73182794	13
KLHL25	chr15:86163213-86163792,chr15:86163823-86164223,chr15:86167646-86168046,chr15:86233002-86233402,chr15:86245509-86245909,chr15:86245939-86246339,chr15:86247149-86247549,chr15:86250239-86250639,chr15:86259769-86260169,chr15:86270139-86270539,chr15:86293741-86294141,chr15:86302969-86303369	15	BP00285:Cell structure and motility
KLRD1	chr12:10367125-10367525,chr12:10376056-10376456,chr12:10376536-10376945,chr12:10380466-10380866,chr12:10387886-10388286	15	BP00102:Signal transduction; BP00148:Immunity and defense
KRR1	chr12:75904719-75905119	4
KRT18	chr12:53342736-53343136,chr12:53343376-53343776	8	BP00285:Cell structure and motility; BP00286:Cell structure; hsa05130:Pathogenic Escherichia coli infection
KRT7	chr12:52595972-52596581,chr12:52626873-52627273,chr12:52627483-52627883	8	BP00193:Developmental processes; BP00285:Cell structure and motility; BP00286:Cell structure
KRT8	chr12:53273238-53273638	8	BP00193:Developmental processes; BP00285:Cell structure and motility; BP00286:Cell structure
KRT80	chr12:52541227-52541627,chr12:52579770-52580170,chr12:52583530-52583930,chr12:52584550-52584950	4	BP00285:Cell structure and motility; BP00286:Cell structure
KY	chr3:134282972-134283372,chr3:134319538-134319938,chr3:134359792-134360192,chr3:134369243-134370100,chr3:134370253-134370653,chr3:134405212-134405612	8
L3MBTL2	chr22:41601138-41601538,chr22:41613611-41614103	9
LACTB	chr15:63349019-63349419,chr15:63365752-63366244,chr15:63426687-63427087,chr15:63427852-63428336	8
LAMA2	chr6:129204110-129204510	15	BP00102:Signal transduction; BP00275:Extracellular matrix protein-mediated signaling
LAMB1	chr7:107607113-107607513,chr7:107608933-107609333,chr7:107612306-107612706,chr7:107638593-107638993,chr7:107641936-107643173,chr7:107643363-107643772	15	BP00102:Signal transduction; BP00275:Extracellular matrix protein-mediated signaling
LAMB3	chr1:209822217-209822802	12	BP00124:Cell adhesion; hsa04510:Focal adhesion; hsa04512:ECM-receptor interaction
LARP6	chr15:71145634-71146034,chr15:71146868-71147304,chr15:71148934-71149478	10
LATS2	chr13:21544690-21545128,chr13:21571748-21572148,chr13:21588428-21588880,chr13:21588920-21589320	4,8	BP00063:Protein modification; BP00064:Protein phosphorylation; BP00102:Signal transduction; BP00111:Intracellular signaling cascade; BP00119:Other intracellular signaling cascade; BP00203:Cell cycle; BP00207:Cell cycle control; BP00224:Cell proliferation and differentiation
LCNL1	chr9:139871837-139872237,chr9:139872527-139872927	10
LEP	chr7:127881233-127881633	14	BP00102:Signal transduction; BP00103:Cell surface receptor mediated signal transduction; BP00107:Cytokine and chemokine mediated signaling pathway
LEPREL1	chr3:189837819-189838219	1
LEPROT	chr1:65887191-65887591,chr1:65887751-65888377,chr1:65889901-65890441,chr1:65895591-65896007,chr1:65896457-65896857,chr1:65991154-65991668,chr1:65992904-65993304,chr1:65993374-65993774,chr1:66048271-66048671,chr1:66050071-66050471,chr1:66104246-66104646,chr1:66104666-66105127,chr1:66105396-66106136,chr1:66117844-66118244	13	BP00102:Signal transduction; BP00103:Cell surface receptor mediated signal transduction; BP00107:Cytokine and chemokine mediated signaling pathway
LGR4	chr11:27180330-27180730,chr11:27234196-27234596,chr11:27234776-27235248,chr11:27239436-27239836,chr11:27255105-27255505,chr11:27255532-27255932,chr11:27256026-27256426,chr11:27260782-27261285,chr11:27263232-27263632,chr11:27270162-27270942,chr11:27384058-27384458,chr11:27400528-27400928,chr11:27430868-27431268	10
LHFPL2	chr5:77821155-77821555,chr5:77843745-77844145,chr5:77890735-77891212,chr5:77943218-77944289,chr5:78094991-78095391	8
LIF	chr22:30632010-30632410,chr22:30635174-30635774,chr22:30641781-30642181	4
LIFR	chr5:38472070-38473090,chr5:38483890-38484290,chr5:38498060-38498460,chr5:38500830-38501230,chr5:38504980-38505380,chr5:38542270-38542670,chr5:38783455-38783855,chr5:38809783-38810183	15	BP00102:Signal transduction; BP00103:Cell surface receptor mediated signal transduction; BP00107:Cytokine and chemokine mediated signaling pathway; BP00148:Immunity and defense
LIG1	chr19:48673284-48673716	1	hsa03030:DNA replication
LIMA1	chr12:50635771-50636921,chr12:50640612-50641051	8	BP00285:Cell structure and motility; BP00286:Cell structure; BP00287:Cell motility
LIMD1	chr3:45685722-45686122,chr3:45686408-45686808,chr3:45688448-45688848	8
LIMK1	chr7:73448227-73448627	1
LIN7B	chr19:49594801-49595201,chr19:49617911-49618441	4	BP00285:Cell structure and motility; BP00286:Cell structure
LINGO3	chr19:2306445-2306845	13	BP00102:Signal transduction; BP00103:Cell surface receptor mediated signal transduction; BP00193:Developmental processes
LMCD1	chr3:8544472-8544872,chr3:8550456-8550936,chr3:8601322-8601965,chr3:8602132-8602892,chr3:8603815-8604292,chr3:8604862-8605262	14
LMF2	chr22:50946497-50946897	4
LMNA	chr1:156076391-156076791	4	BP00285:Cell structure and motility; BP00286:Cell structure; hsa05410:Hypertrophic cardiomyopathy (HCM); hsa05412:Arrhythmogenic right ventricular cardiomyopathy (ARVC); hsa05414:Dilated cardiomyopathy
LMNB1	chr5:126112134-126112534,chr5:126112552-126113134,chr5:126113359-126114449,chr5:126139897-126140297	3
LMO7	chr13:76209886-76210286,chr13:76212616-76213016,chr13:76437697-76438134,chr13:76438786-76439186,chr13:76440753-76441244,chr13:76460193-76460593	4
LOX	chr5:121399469-121399948,chr5:121427775-121428175,chr5:121428985-121429505	8	BP00124:Cell adhesion; BP00264:Tumor suppressor
LOXL1	chr15:74191719-74192119,chr15:74221152-74221552,chr15:74249012-74249462	8	BP00124:Cell adhesion; BP00264:Tumor suppressor
LOXL2	chr8:23225519-23225919,chr8:23256311-23256711	8	BP00124:Cell adhesion; BP00264:Tumor suppressor
LOXL3	chr2:74782064-74782558,chr2:74785698-74786398	8	BP00124:Cell adhesion; BP00264:Tumor suppressor
LOXL4	chr10:100027671-100028071,chr10:100153941-100154341	8	BP00124:Cell adhesion; BP00264:Tumor suppressor
LPAR1	chr9:113507679-113508079,chr9:113514649-113515049,chr9:113516019-113516419,chr9:113664946-113665346,chr9:113716526-113716926,chr9:113724256-113724656,chr9:113729991-113730391,chr9:113736746-113737146,chr9:113741186-113741586,chr9:113799377-113799777,chr9:113799997-113800397,chr9:114061465-114061865	15	BP00102:Signal transduction; BP00103:Cell surface receptor mediated signal transduction
LPAR6	chr13:48977259-48977659	13	BP00102:Signal transduction; BP00103:Cell surface receptor mediated signal transduction
LPCAT4	chr15:34658427-34659153	4
LPXN	chr11:58291823-58292223,chr11:58343076-58343476	1
LRFN4	chr11:66611958-66612358,chr11:66627838-66628238	15	BP00102:Signal transduction; BP00103:Cell surface receptor mediated signal transduction; BP00110:Other receptor mediated signaling pathway
LRIG3	chr12:59254044-59254444,chr12:59256554-59256954,chr12:59272484-59272884,chr12:59311634-59312034,chr12:59313950-59314438	15	BP00102:Signal transduction; BP00103:Cell surface receptor mediated signal transduction; BP00110:Other receptor mediated signaling pathway
LRP12	chr8:105655410-105655810	4
LRP2BP	chr4:186245071-186245471,chr4:186280885-186281285	4,8
LRP4	chr11:47179067-47179467	15
LRRC17	chr7:102512581-102512981	10	BP00102:Signal transduction; BP00193:Developmental processes
LRRC32	chr11:76381518-76381988	9
LSAMP	chr3:115523975-115524455	10	BP00124:Cell adhesion; BP00193:Developmental processes
LSM5	chr7:32529440-32529840	6	BP00031:Nucleoside, nucleotide and nucleic acid metabolism
LTB4R	chr14:24779927-24780327,chr14:24785443-24785843,chr14:24792131-24792531	6
LTBP2	chr14:74981247-74981647,chr14:75103069-75103469	8	BP00102:Signal transduction; BP00193:Developmental processes; BP00274:Cell communication
LYRM5	chr12:25353722-25354122,chr12:25355222-25355770	4
LZTS2	chr10:102756721-102757121,chr10:102758301-102758701,chr10:102767851-102768271	4,8
MACF1	chr1:39595895-39596295,chr1:39670779-39671179,chr1:39864382-39864808,chr1:39875618-39876018	8,9	BP00207:Cell cycle control
MAD1L1	chr7:1938891-1939291,chr7:1952264-1952664,chr7:1980014-1980491,chr7:2011500-2011900	4	BP00203:Cell cycle; BP00282:Mitosis; hsa04110:Cell cycle
MAF	chr16:79627027-79627427	15
MAFF	chr22:38610152-38610632,chr22:38636932-38637332	8	BP00224:Cell proliferation and differentiation
MAFK	chr7:1577428-1577859	8	BP00224:Cell proliferation and differentiation
MALL	chr2:110859230-110859630,chr2:110873259-110873659,chr2:110873879-110874279	8
MAN1A1	chr6:119671544-119671961	13
MAP1B	chr5:71425380-71425780,chr5:71437648-71438127,chr5:71492720-71493120,chr5:71507130-71507530	8	BP00285:Cell structure and motility
MAP1S	chr19:17832540-17832940,chr19:17838790-17839190	8	BP00285:Cell structure and motility
MAP2K3	chr17:21189512-21190213,chr17:21218813-21219213,chr17:21219232-21219632	1	hsa04010:MAPK signaling pathway
MAP2K6	chr17:67410550-67411008,chr17:67476508-67476908,chr17:67481188-67481588,chr17:67498317-67498717	15	BP00289:Other metabolism
MAP3K14	chr17:43338993-43339393,chr17:43339573-43339973,chr17:43394681-43395142,chr17:43398363-43398802,chr17:43419122-43419559	8	BP00063:Protein modification; BP00064:Protein phosphorylation
MAP3K5	chr6:136871706-136872106,chr6:137084752-137085152	15	BP00289:Other metabolism
MAP4	chr3:47888736-47889136	9	BP00285:Cell structure and motility; BP00286:Cell structure
MAP7	chr6:136871152-136871672	13	BP00193:Developmental processes
MAPK11	chr22:50708780-50709180,chr22:50708977-50709377,chr22:50710007-50710472	10,9	BP00064:Protein phosphorylation; BP00102:Signal transduction
MAPKAPK2	chr1:206861035-206861435,chr1:206879545-206879945,chr1:206880255-206880655,chr1:206915705-206916105,chr1:206922795-206923235	15	BP00102:Signal transduction; BP00148:Immunity and defense
MARCKS	chr6:113953508-113953908,chr6:114179368-114179768,chr6:114180198-114180736,chr6:114181002-114181406,chr6:114186308-114186802	9
MBNL1	chr3:151921327-151921788,chr3:151922977-151923458	8	BP00193:Developmental processes
MBOAT2	chr2:9331716-9332116	4
MBOAT7	chr19:54692936-54693336	4
MBP	chr18:74813232-74813632,chr18:74813852-74814252,chr18:74814442-74814842,chr18:74815428-74815828,chr18:74815872-74816272	8	BP00285:Cell structure and motility; BP00286:Cell structure
MCAM	chr11:119186330-119186730,chr11:119187528-119187960,chr11:119189434-119189940	6
MCFD2	chr2:47109720-47110120,chr2:47129678-47130078	4	BP00136:Other intracellular protein traffic
MCM10	chr10:13203118-13203788	1
MCM3	chr6:52149247-52149647	6	BP00031:Nucleoside, nucleotide and nucleic acid metabolism; BP00203:Cell cycle; hsa04110:Cell cycle
MCM4	chr8:48873748-48874148	1	hsa03030:DNA replication; hsa04110:Cell cycle
MDM2	chr12:69208825-69209225,chr12:69221695-69222095	11
ME3	chr11:86195583-86195983,chr11:86339225-86339625,chr11:86452946-86453346,chr11:86454228-86454628	9
MED15	chr22:20863480-20863984,chr22:20885455-20886501,chr22:20891885-20892285,chr22:20942824-20943245,chr22:20943445-20944274	4
MED24	chr17:38192210-38192610	6	BP00031:Nucleoside, nucleotide and nucleic acid metabolism
MED9	chr17:17261629-17262029,chr17:17304849-17305249,chr17:17336427-17336827	15
MEG3	chr14:101293324-101293724	8
MEGF6	chr1:3459667-3460067,chr1:3460617-3461017,chr1:3464567-3464967	8	BP00102:Signal transduction; BP00120:Cell adhesion-mediated signaling; BP00129:Endocytosis; BP00193:Developmental processes; BP00274:Cell communication; BP00275:Extracellular matrix protein-mediated signaling
MEIS1	chr2:66661261-66661661,chr2:66671731-66672131,chr2:66739281-66739681,chr2:66749281-66749681,chr2:66764771-66765171,chr2:66766891-66767291,chr2:66802870-66803440,chr2:66803971-66804371,chr2:66804541-66804941,chr2:66808841-66809241	14	BP00193:Developmental processes; BP00224:Cell proliferation and differentiation
MESDC2	chr15:81072912-81073312,chr15:81081532-81081932,chr15:81091480-81091880,chr15:81144930-81145330,chr15:81169632-81170032,chr15:81197390-81197790,chr15:81245242-81245642	8	BP00193:Developmental processes
MEST	chr7:130131694-130132094,chr7:130132151-130132551	8
MET	chr7:116311952-116312552,chr7:116312343-116312760,chr7:116327781-116328263,chr7:116356803-116357203,chr7:116413232-116413632,chr7:116438442-116438842,chr7:116442398-116442798,chr7:116442918-116443318	1,4	BP00063:Protein modification; BP00203:Cell cycle; BP00207:Cell cycle control; BP00285:Cell structure and motility; BP00287:Cell motility; hsa04510:Focal adhesion; hsa04520:Adherens junction; hsa05200:Pathways in cancer; hsa05211:Renal cell carcinoma
METRNL	chr17:81038995-81039395,chr17:81040919-81041574,chr17:81057999-81058399,chr17:81067239-81067745,chr17:81150731-81151131,chr17:81151361-81151761	8
METTL7A	chr12:51317978-51318705	15
MEX3C	chr18:48577372-48577772,chr18:48702711-48703111	9
MFAP2	chr1:17296687-17297087,chr1:17297497-17297897,chr1:17306767-17307167	10
MFAP5	chr12:8792032-8792432,chr12:8796211-8796611	4	BP00285:Cell structure and motility
MFSD2A	chr1:40434966-40435366	15
MGLL	chr3:127453655-127454097,chr3:127458897-127459297,chr3:127466927-127467327,chr3:127487383-127487787,chr3:127494387-127494787,chr3:127541200-127541617	1
MGST1	chr12:16501808-16502208,chr12:16518538-16518938	13	hsa00480:Glutathione metabolism; hsa00980:Metabolism of xenobiotics by cytochrome P450
MICAL2	chr11:12131640-12132114,chr11:12132572-12133010	8	BP00193:Developmental processes
MICAL3	chr22:18268484-18268884,chr22:18506271-18506769	4
MICALCL	chr11:12133304-12133704,chr11:12204040-12204620,chr11:12217391-12217791,chr11:12245944-12246380,chr11:12288370-12288770,chr11:12288890-12289290,chr11:12291090-12291490,chr11:12309408-12309808	8
MICB	chr6:31387734-31388134,chr6:31461660-31462060,chr6:31463312-31463712	1
MIER2	chr19:342826-343226,chr19:343406-343806,chr19:344819-345219	4
MKI67	chr10:129894961-129895361	4
MLF1IP	chr4:185654417-185654817,chr4:185654975-185655459	1
MLPH	chr2:238341059-238341997,chr2:238343545-238343945,chr2:238384503-238384903	8
MMD	chr17:53468672-53469072,chr17:53498187-53498587,chr17:53498617-53499017,chr17:53796312-53796712	15	BP00019:Lipid, fatty acid and steroid metabolism; BP00020:Fatty acid metabolism; BP00102:Signal transduction; BP00103:Cell surface receptor mediated signal transduction; BP00148:Immunity and defense
MME	chr3:154688357-154688927,chr3:154783462-154783862,chr3:154797556-154798005,chr3:154798475-154798875,chr3:154813566-154813966,chr3:154820255-154820655,chr3:154827236-154827636,chr3:154877046-154877446,chr3:154880816-154881216,chr3:154900696-154901096,chr3:154903687-154904106,chr3:154905326-154906476,chr3:154907207-154907826,chr3:154909056-154909456,chr3:154950163-154950602	13	BP00102:Signal transduction; BP00103:Cell surface receptor mediated signal transduction
MMP2	chr16:55504419-55504819,chr16:55529069-55529469	1
MMP28	chr17:34091241-34091641,chr17:34122404-34122804	12
MN1	chr22:27509208-27509608,chr22:27598436-27598836,chr22:27620366-27620766,chr22:28114064-28114464	9
MOCS1	chr6:39871898-39872298	13
MOK	chr14:102692332-102692732,chr14:102692802-102693202,chr14:102701495-102701895	1,4
MORC4	chrX:106242271-106242671	8
MPP3	chr17:41909981-41910395	4
MPRIP	chr17:16924549-16924949,chr17:17094743-17095143	4	BP00285:Cell structure and motility; BP00286:Cell structure
MRAP	chr21:33717816-33718216	15
MRC2	chr17:60730310-60731358	8	BP00129:Endocytosis
MRGPRF	chr11:68780441-68780891	8
MRP63	chr13:21750117-21750555	1
MRPL18	chr6:160211015-160211415	4
MRPL44	chr2:224834818-224836028,chr2:224836088-224837208,chr2:224837658-224838058	8
MRPS6	chr21:35521494-35521894,chr21:35590255-35590655	15
MSC	chr8:72742876-72743976,chr8:72751646-72752046,chr8:72752219-72752999,chr8:72753636-72754116,chr8:72755236-72755636,chr8:72766566-72766966,chr8:72769946-72770646,chr8:72776006-72776406,chr8:72875877-72876277	10
MSRB3	chr12:65673110-65673513,chr12:65720813-65721213,chr12:65760968-65761368,chr12:65959813-65960319,chr12:65997564-65998334,chr12:65998344-65998744,chr12:66006164-66006564,chr12:66025663-66026117,chr12:66037473-66037913,chr12:66050785-66051185,chr12:66051352-66051845	8	BP00063:Protein modification
MT1E	chr16:56651178-56651643,chr16:56659507-56659938,chr16:56661107-56661507	13,15
MT1M	chr16:56665929-56666329,chr16:56666349-56666749	15
MT1X	chr16:56716199-56716599	15
MT2A	chr16:56642440-56642840	13
MTHFD1L	chr6:151223033-151223433,chr6:151427749-151428149	9
MTHFD2	chr2:74449800-74450200,chr2:74450360-74450760,chr2:74452580-74452980	10
MXD3	chr5:176738607-176739027,chr5:176739207-176739607,chr5:176754556-176755001	1,4
MYBL1	chr8:67419635-67420035,chr8:67434296-67434717,chr8:67434956-67435417,chr8:67467967-67468367,chr8:67524749-67525149,chr8:67525219-67525649	1,4	BP00203:Cell cycle; BP00207:Cell cycle control
MYBPHL	chr1:109841475-109842006,chr1:109842325-109842725,chr1:109847946-109848346,chr1:109849427-109849836,chr1:109938827-109939227	14
MYC	chr8:128747319-128747799,chr8:129552494-129552894	13	BP00207:Cell cycle control; hsa04310:Wnt signaling pathway; hsa04350:TGF-beta signaling pathway; hsa04630:Jak-STAT signaling pathway; hsa05213:Endometrial cancer; hsa05221:Acute myeloid leukemia
MYL12B	chr18:3250679-3251079,chr18:3251279-3251679,chr18:3262874-3263274	8	BP00173:Muscle contraction; BP00193:Developmental processes; BP00285:Cell structure and motility; hsa04510:Focal adhesion; hsa04530:Tight junction; hsa04670:Leukocyte transendothelial migration; hsa04810:Regulation of actin cytoskeleton
MYLIP	chr6:16139631-16140031,chr6:16149621-16150021	13
MYLK	chr3:123324764-123325164,chr3:123327324-123327782,chr3:123347482-123347882,chr3:123359144-123359544,chr3:123372074-123372574,chr3:123372584-123372984,chr3:123380434-123381012,chr3:123407292-123407712,chr3:123420034-123420444,chr3:123452742-123453142,chr3:123453361-123453761,chr3:123458552-123458952,chr3:123535577-123535977,chr3:123601287-123601687,chr3:123602296-123602696	4,8,9	BP00063:Protein modification; BP00064:Protein phosphorylation; BP00102:Signal transduction; BP00120:Cell adhesion-mediated signaling; BP00173:Muscle contraction; BP00274:Cell communication; BP00275:Extracellular matrix protein-mediated signaling; BP00285:Cell structure and motility; hsa04020:Calcium signaling pathway; hsa04270:Vascular smooth muscle contraction; hsa04510:Focal adhesion; hsa04810:…
MYO10	chr5:16661093-16661493,chr5:16733546-16733946,chr5:16798106-16798506,chr5:16809883-16810446,chr5:16935626-16936043	6
MYO19	chr17:34889996-34890396	4	BP00285:Cell structure and motility; BP00286:Cell structure; BP00287:Cell motility
MYO1B	chr2:192036889-192037289,chr2:192110729-192111129,chr2:192111427-192111893,chr2:192295967-192296422,chr2:192298142-192298542	4
MYO1C	chr17:1364532-1364932,chr17:1366042-1366442,chr17:1366592-1366992,chr17:1390142-1390568,chr17:1391520-1391938	4
MYO9B	chr19:17190641-17191041,chr19:17218661-17219157,chr19:17246073-17246560,chr19:17246493-17246893	4,8	BP00102:Signal transduction; BP00111:Intracellular signaling cascade; BP00285:Cell structure and motility; BP00286:Cell structure
MYOF	chr10:95136155-95136555,chr10:95168376-95168776,chr10:95240436-95240836,chr10:95240984-95241384,chr10:95241416-95241816	8	BP00173:Muscle contraction
NAA40	chr11:63706359-63706773	4
NAMPT	chr7:105883545-105884003,chr7:105884333-105884733,chr7:105898023-105898423	13	BP00102:Signal transduction; hsa00760:Nicotinate and nicotinamide metabolism
NAT8L	chr4:2225928-2226328	13
NAV1	chr1:201509484-201509884,chr1:201739151-201739631	9
NAV2	chr11:19390360-19390760,chr11:19454351-19454751,chr11:19840629-19841029,chr11:19988021-19988421,chr11:20111086-20111486,chr11:20123346-20123746	15
NAV3	chr12:78391957-78392357,chr12:78435267-78435667,chr12:78524267-78524667,chr12:78528267-78528667	1
NCAPD2	chr12:6603002-6603402	1
NCAPG	chr4:17848901-17849301,chr4:18022226-18022626	1
NCAPG2	chr7:158497191-158497619	1
NCEH1	chr3:172349232-172349632	1
NCOA7	chr6:126101351-126101784,chr6:126101951-126102433,chr6:126139737-126140137	11
NDRG1	chr8:134239541-134239941,chr8:134245481-134245881,chr8:134247035-134247515,chr8:134276449-134276849,chr8:134308122-134308522	13
NDUFS8	chr11:67798516-67798916	4
NEK10	chr3:27131782-27132182,chr3:27132552-27132952,chr3:27133702-27134102,chr3:27138332-27138732,chr3:27139132-27139532,chr3:27175662-27176062	10
NEK2	chr1:211834089-211834489,chr1:211848728-211849185	1,3
NEK7	chr1:198057756-198058256,chr1:198086455-198086893,chr1:198087083-198087903,chr1:198089313-198089713,chr1:198090153-198090753,chr1:198092483-198092883,chr1:198125157-198125716,chr1:198127037-198127517,chr1:198127537-198127937,chr1:198128837-198129237,chr1:198148599-198148999,chr1:198227787-198228187,chr1:198237039-198237439,chr1:198258507-198258907,chr1:198294882-198295680,chr1:198295982-198296382	8	BP00063:Protein modification; BP00064:Protein phosphorylation
NELF	chr9:140342242-140342642,chr9:140351012-140351479	13
NEURL1B	chr5:172067823-172068235	1
NF2	chr22:29999868-30000268	4	BP00285:Cell structure and motility; BP00286:Cell structure
NFATC4	chr14:24837827-24838317,chr14:24848417-24848817	6	BP00031:Nucleoside, nucleotide and nucleic acid metabolism; hsa04010:MAPK signaling pathway; hsa04310:Wnt signaling pathway; hsa04662:B cell receptor signaling pathway
NFIL3	chr9:94168030-94168486,chr9:94182865-94183265,chr9:94183675-94184075,chr9:94185125-94185915,chr9:94186236-94187016,chr9:94579202-94579602,chr9:94580002-94580402	13
NFKBIA	chr14:35805511-35805911,chr14:35811451-35812021,chr14:35854813-35855270,chr14:35869678-35870306	13	BP00102:Signal transduction; BP00111:Intracellular signaling cascade
NGF	chr1:115732435-115733205,chr1:115733555-115733955,chr1:115770496-115770896,chr1:115782216-115782740,chr1:115829161-115829561,chr1:115875543-115875943,chr1:115877613-115878013,chr1:115880253-115881011,chr1:116039871-116040271	8	BP00102:Signal transduction; BP00108:Receptor protein tyrosine kinase signaling pathway; BP00193:Developmental processes; BP00274:Cell communication
NID1	chr1:236162783-236163183,chr1:236182533-236182933,chr1:236183653-236184053,chr1:236184633-236185033,chr1:236187533-236187933,chr1:236192633-236193033,chr1:236228159-236228577	15
NIPSNAP3B	chr9:107688839-107689241	13
NKD2	chr5:1004684-1005155,chr5:1056761-1057161,chr5:956822-957222	13	hsa04310:Wnt signaling pathway
NKRF	chrX:118739561-118739961	4
NLGN4Y	chrY:16634263-16634734	6
NLRP1	chr17:5403146-5403546,chr17:5487092-5487492	8
NLRP10	chr11:7986726-7987126	8
NMI	chr2:152159321-152159721	10	BP00102:Signal transduction
NMNAT2	chr1:183237628-183238028,chr1:183241677-183242208,chr1:183248018-183248418,chr1:183248938-183249338,chr1:183250718-183251118	9
NNMT	chr11:114025484-114025884,chr11:114030944-114031344,chr11:114031484-114031884,chr11:114033264-114033760,chr11:114034244-114034920,chr11:114037494-114037894,chr11:114049834-114050234,chr11:114050430-114050830,chr11:114056254-114056654,chr11:114063494-114063894,chr11:114067910-114068310,chr11:114068410-114068810,chr11:114068930-114069830,chr11:114077884-114078284,chr11:114113070-114113470,chr11:114…	13	hsa00760:Nicotinate and nicotinamide metabolism
NOG	chr17:54670927-54671456,chr17:54673726-54674126	14	BP00193:Developmental processes
NOL12	chr22:38072582-38072982	4
NOTCH1	chr9:139446605-139447005,chr9:139462387-139462787	8	BP00102:Signal transduction; BP00120:Cell adhesion-mediated signaling; BP00193:Developmental processes; BP00224:Cell proliferation and differentiation; BP00274:Cell communication; BP00285:Cell structure and motility; BP00287:Cell motility
NOTCH3	chr19:15306225-15306758,chr19:15306845-15307245	11
NPAS2	chr2:101595079-101595479	14
NPC1	chr18:21106804-21107204	4	hsa04142:Lysosome
NPFF	chr12:53900117-53900517,chr12:53900767-53901167	4
NPR3	chr5:32709032-32709432,chr5:32710112-32711697,chr5:32711834-32713387,chr5:32713587-32714147,chr5:32714852-32715252,chr5:32715632-32716032,chr5:32716312-32716812,chr5:32802952-32803372,chr5:32803462-32803862,chr5:32804282-32804682,chr5:32811187-32811587	13
NR1D1	chr17:38248174-38248574,chr17:38248589-38248989	15
NR3C1	chr5:142381574-142381974,chr5:142622463-142622863,chr5:142622873-142623273,chr5:142623363-142624243,chr5:142624363-142624763,chr5:142732827-142733227,chr5:142748448-142748848,chr5:142749597-142749997,chr5:142915929-142916329,chr5:143536292-143536777,chr5:143536997-143537397,chr5:143537252-143537652	4,8
NR4A1	chr12:52444709-52445109	6	BP00031:Nucleoside, nucleotide and nucleic acid metabolism; hsa04010:MAPK signaling pathway
NRCAM	chr7:107949246-107949646	13	BP00102:Signal transduction; BP00193:Developmental processes
NREP	chr5:111016798-111017198,chr5:111017378-111017778,chr5:111055583-111055983,chr5:111056123-111056523,chr5:111091603-111092331,chr5:111116893-111117293,chr5:111265292-111265692,chr5:111265852-111266252,chr5:111266272-111266672,chr5:111267772-111268172,chr5:111268522-111268922,chr5:111284182-111284582,chr5:111289192-111289592,chr5:111304322-111304722,chr5:111312122-111312622,chr5:111332808-111333208	10
NRG1	chr8:32098390-32098790,chr8:32404677-32405106,chr8:32405137-32406097,chr8:32406187-32406633,chr8:32466686-32467086,chr8:32507657-32508057,chr8:32531156-32531556,chr8:32552236-32552636,chr8:32558807-32559207,chr8:32579187-32579636,chr8:32608097-32608497,chr8:32631036-32631436	4,8	BP00102:Signal transduction; BP00108:Receptor protein tyrosine kinase signaling pathway; BP00193:Developmental processes; BP00224:Cell proliferation and differentiation; BP00274:Cell communication
NRIP1	chr21:16329311-16329711,chr21:16330081-16330481,chr21:16330631-16331281	6	BP00031:Nucleoside, nucleotide and nucleic acid metabolism
NRM	chr6:30658221-30658749	4
NRXN2	chr11:64376184-64376584,chr11:64377350-64377944,chr11:64415761-64416161,chr11:64416831-64417231,chr11:64420581-64421121,chr11:64422261-64422741,chr11:64423322-64423722,chr11:64427126-64427672,chr11:64428091-64428512	8	BP00102:Signal transduction; BP00120:Cell adhesion-mediated signaling; BP00124:Cell adhesion; BP00274:Cell communication; hsa04514:Cell adhesion molecules (CAMs)
NSUN7	chr4:40765351-40765751	10
NT5E	chr6:86159565-86160028,chr6:86174358-86174758,chr6:86206749-86207149	4
NTM	chr11:131769225-131769625,chr11:131780905-131781305,chr11:131894527-131895008,chr11:131922185-131922585,chr11:131923995-131924395,chr11:131924545-131925009,chr11:131942445-131943145	4,8	BP00124:Cell adhesion; BP00193:Developmental processes
NTN4	chr12:96047915-96048315,chr12:96083371-96083771,chr12:96094066-96094466,chr12:96133861-96134261,chr12:96180885-96181285,chr12:96183225-96184181,chr12:96184260-96184711,chr12:96199388-96199843,chr12:96199953-96200353	8	BP00102:Signal transduction; BP00193:Developmental processes; BP00274:Cell communication; BP00275:Extracellular matrix protein-mediated signaling; hsa04360:Axon guidance
NUAK1	chr12:105711164-105711564,chr12:105724806-105725206,chr12:106423996-106424396,chr12:106454140-106454661,chr12:106454700-106455241,chr12:106455343-106455743,chr12:106530091-106530491,chr12:106531101-106532141,chr12:106628552-106629011,chr12:106629244-106629684,chr12:106630442-106630941	8	BP00063:Protein modification; BP00064:Protein phosphorylation
NUCKS1	chr1:205669845-205670245,chr1:205680405-205680805	6	BP00203:Cell cycle
NUDT16	chr3:131105461-131105861,chr3:131106151-131107010,chr3:131175988-131176388	15
NUDT6	chr4:123822706-123823106,chr4:123824564-123824964,chr4:123825254-123825654,chr4:123826966-123827366	8	BP00224:Cell proliferation and differentiation
NUPR1	chr16:28545523-28545963	10
OBFC1	chr10:105675585-105675985,chr10:105676405-105676805,chr10:105676968-105677368	15
ODC1	chr2:10578843-10579243	6
OLFM3	chr1:103392836-103393276,chr1:103423156-103423556	14	BP00102:Signal transduction; BP00103:Cell surface receptor mediated signal transduction; BP00193:Developmental processes
OLFML3	chr1:114522453-114523233,chr1:114523610-114524380,chr1:114524523-114525129,chr1:114525920-114526320	13	BP00102:Signal transduction; BP00103:Cell surface receptor mediated signal transduction
OPA3	chr19:46011553-46012263	8
OPN1SW	chr7:128414317-128414717,chr7:128417153-128417671,chr7:128423243-128423657	4
OPRM1	chr6:154732004-154732404	14	BP00102:Signal transduction; BP00103:Cell surface receptor mediated signal transduction
ORC6	chr16:46723409-46723901	3
OSBPL3	chr7:24826502-24826948,chr7:24860916-24861402,chr7:25010413-25010813,chr7:25020707-25021366	8
OSBPL5	chr11:3105482-3105882,chr11:3106337-3106966,chr11:3107286-3107962,chr11:3136630-3137030,chr11:3181460-3182162,chr11:3182402-3182802,chr11:3190655-3191292	13
OSMR	chr5:38641031-38641661,chr5:38803893-38804293,chr5:38816333-38816733,chr5:38847903-38848303,chr5:38871213-38871613,chr5:38893004-38893404,chr5:38895133-38895533,chr5:38911201-38911601,chr5:38914103-38914503,chr5:38940609-38941009,chr5:38962743-38963143	13,15	BP00102:Signal transduction; BP00103:Cell surface receptor mediated signal transduction; BP00107:Cytokine and chemokine mediated signaling pathway; hsa04630:Jak-STAT signaling pathway
OSR1	chr2:19548316-19548716,chr2:19549192-19549592,chr2:19549902-19550472,chr2:19557390-19557892,chr2:19808042-19808442,chr2:19916652-19917452,chr2:19995893-19996293,chr2:20071859-20072259	15
OSR2	chr8:99956501-99956921	13	BP00193:Developmental processes
OSTC	chr4:109572533-109572973	8
OVGP1	chr1:111970005-111970405	15	BP00001:Carbohydrate metabolism
P2RY6	chr11:72975416-72975816	9
P4HTM	chr3:49027856-49028411	4	BP00063:Protein modification
PACSIN3	chr11:47207036-47207496	1
PADI1	chr1:17494668-17495068,chr1:17516336-17516856,chr1:17558755-17559155	8	BP00063:Protein modification
PAFAH1B3	chr19:42806351-42806818	8
PALM	chr19:709913-710313	10	BP00102:Signal transduction
PAPD7	chr5:6713088-6713528,chr5:6759708-6760108	4	BP00203:Cell cycle
PAPPA	chr9:118916059-118916571,chr9:118916889-118917289,chr9:118917449-118917849,chr9:118919099-118919721,chr9:118919761-118920161,chr9:118970831-118971231,chr9:118996437-118996837,chr9:119021766-119022166,chr9:119025746-119026146,chr9:119041741-119042141,chr9:119050799-119051276,chr9:119072262-119072662,chr9:119098642-119099042,chr9:119099351-119099751,chr9:119127282-119127682,chr9:119142922-119143322…	13	BP00193:Developmental processes
PATL1	chr11:59400872-59401272,chr11:59435602-59436002	9
PBK	chr8:27695119-27695614	1
PC	chr11:66675074-66675474,chr11:66726140-66726540,chr11:66737652-66738052	15	BP00001:Carbohydrate metabolism; hsa00620:Pyruvate metabolism
PCDH1	chr5:141200889-141201589	10	BP00102:Signal transduction; BP00124:Cell adhesion; BP00193:Developmental processes; BP00274:Cell communication
PCDHGC5	chr5:140887502-140887902,chr5:140888102-140888502	8	BP00102:Signal transduction; BP00120:Cell adhesion-mediated signaling; BP00124:Cell adhesion; BP00274:Cell communication
PCID2	chr13:113861755-113862155	9
PCK2	chr14:24562890-24563322,chr14:24564062-24564462,chr14:24564532-24564932,chr14:24574512-24574912,chr14:24576620-24577020	10
PCNA	chr20:5099888-5100288	1	hsa03030:DNA replication; hsa04110:Cell cycle
PDCD4	chr10:112661961-112662613	11	BP00060:Protein metabolism and modification
PDE1C	chr7:32108874-32109274,chr7:32109584-32109984	8	BP00102:Signal transduction; hsa04020:Calcium signaling pathway
PDE4B	chr1:65906771-65907171,chr1:66737010-66737410,chr1:66737590-66737990,chr1:66797305-66797705,chr1:66797738-66798278	6	BP00031:Nucleoside, nucleotide and nucleic acid metabolism
PDE4D	chr5:58218679-58219079,chr5:58263510-58264140,chr5:58264160-58264560,chr5:58265130-58265530,chr5:58334984-58335821,chr5:58422309-58422709,chr5:58423589-58423989	14	BP00102:Signal transduction
PDE7B	chr6:136172651-136173061,chr6:136173939-136175009,chr6:136175429-136175829,chr6:136191159-136191559,chr6:136195699-136196099,chr6:136222841-136223241,chr6:136241659-136242619,chr6:136243291-136243691,chr6:136251429-136251829,chr6:136276699-136277099,chr6:136277251-136277651,chr6:136291269-136291759,chr6:136371525-136371925,chr6:136435925-136436325,chr6:136475664-136476064,chr6:136495054-136495454…	13	BP00102:Signal transduction
PDGFA	chr7:194878-195278,chr7:534965-535365,chr7:535675-536075,chr7:557475-557875,chr7:562065-562465	10	BP00102:Signal transduction; BP00122:Ligand-mediated signaling; BP00274:Cell communication; BP00286:Cell structure; hsa04060:Cytokine-cytokine receptor interaction; hsa04510:Focal adhesion
PDGFC	chr4:157695590-157695990,chr4:157893017-157893446	4	hsa04510:Focal adhesion; hsa04810:Regulation of actin cytoskeleton
PDGFRA	chr4:55099189-55099589,chr4:55099829-55100679	15	BP00102:Signal transduction; BP00103:Cell surface receptor mediated signal transduction; BP00148:Immunity and defense; BP00285:Cell structure and motility
PDIA5	chr3:122786490-122787426	8	BP00063:Protein modification
PDK4	chr7:95237905-95238305	15
PDLIM1	chr10:96992742-96993142,chr10:97050477-97050877	15	BP00285:Cell structure and motility
PDLIM2	chr8:22419265-22419837	9	BP00285:Cell structure and motility; BP00286:Cell structure; BP00287:Cell motility
PDLIM5	chr4:95427935-95428335,chr4:95592139-95592539,chr4:95594239-95594639,chr4:95598175-95598575,chr4:95598889-95599289	1
PDLIM7	chr5:176921377-176921777,chr5:176922365-176922767,chr5:176923615-176924067	8	BP00193:Developmental processes; BP00285:Cell structure and motility; BP00287:Cell motility
PDP1	chr8:94929446-94929846	6
PDXK	chr21:45087427-45087827,chr21:45188499-45188899	15
PDZD11	chrX:69509488-69509888	1
PDZD7	chr10:102790783-102791183,chr10:102790816-102791232,chr10:102792026-102792702	4,8
PDZRN3	chr3:73425685-73426085,chr3:73427152-73427745,chr3:73427755-73428155,chr3:73525474-73525874,chr3:73650162-73650562,chr3:73673080-73673540,chr3:73674450-73674902	13	BP00102:Signal transduction; BP00111:Intracellular signaling cascade
PEA15	chr1:160175859-160176424,chr1:160188634-160189034	4
PEAK1	chr15:77393793-77394193,chr15:77449898-77450298,chr15:77559509-77559909	9
PEAR1	chr1:156863088-156863804,chr1:156864353-156864908,chr1:156866558-156866958,chr1:156868133-156868533,chr1:156870738-156871138,chr1:156890038-156890438	8	BP00129:Endocytosis; BP00193:Developmental processes
PER1	chr17:8045878-8046278,chr17:8054882-8055348,chr17:8055448-8055888,chr17:8056838-8057238,chr17:8057368-8057862,chr17:8059412-8059832	13	BP00102:Signal transduction
PER2	chr2:239194425-239194825,chr2:239195225-239195625,chr2:239196365-239196765,chr2:239197375-239197775	10,8	BP00102:Signal transduction; BP00274:Cell communication
PER3	chr1:7843397-7844171,chr1:7844321-7844721	8	BP00102:Signal transduction; BP00274:Cell communication
PEX5L	chr3:179518995-179519395	15
PGD	chr1:10460453-10460853,chr1:10481361-10481761	13	hsa00480:Glutathione metabolism
PGK1	chrX:77360076-77360476	14
PGM3	chr6:83875216-83875616	9
PHACTR2	chr6:143999513-143999913	6
PHC2	chr1:33785865-33786988,chr1:33812585-33813080,chr1:33813190-33813590,chr1:33814075-33814475,chr1:33814590-33815295	13	BP00193:Developmental processes; BP00248:Mesoderm development
PHF19	chr9:123639334-123639854	1
PHF2	chr9:96442897-96443297	4
PHGDH	chr1:120254923-120255707,chr1:120255977-120256377,chr1:120287497-120287897,chr1:120288137-120288537,chr1:120289077-120289477	10	BP00013:Amino acid metabolism; BP00014:Amino acid biosynthesis; hsa00260:Glycine, serine and threonine metabolism
PHKA1	chrX:71840208-71840608,chrX:71934347-71934747	15	BP00001:Carbohydrate metabolism; hsa04910:Insulin signaling pathway
PHLDB2	chr3:111480178-111480658,chr3:111522253-111522653,chr3:111615854-111616254,chr3:111654804-111655204,chr3:111675274-111675674,chr3:111677833-111678233,chr3:111681184-111681584	8
PIEZO1	chr16:88833898-88834298,chr16:88851088-88851509	4
PIGB	chr15:55638457-55638857	11	BP00060:Protein metabolism and modification
PIK3R1	chr5:67070025-67070425,chr5:67466800-67467200,chr5:67547722-67548122,chr5:67584061-67584552,chr5:67598486-67598886,chr5:67599351-67599751,chr5:67599906-67600306	13	BP00102:Signal transduction; BP00111:Intracellular signaling cascade; hsa04630:Jak-STAT signaling pathway; hsa04930:Type II diabetes mellitus; hsa05213:Endometrial cancer; hsa05221:Acute myeloid leukemia
PIM1	chr6:37045716-37046116,chr6:37139583-37139983	13	hsa04630:Jak-STAT signaling pathway; hsa05221:Acute myeloid leukemia
PIP5KL1	chr9:130690291-130690691,chr9:130690734-130691654,chr9:130693504-130693904	9
PITPNC1	chr17:65374634-65375059,chr17:65487060-65487544,chr17:65696077-65696617	13
PITPNM3	chr17:6355189-6355589,chr17:6458610-6459010	1
PKD1	chr16:2137909-2138309	9
PKDCC	chr2:42286877-42287277	15
PKM2	chr15:72509503-72509903,chr15:72524430-72524892	4
PKN1	chr19:14545525-14545988	8	BP00063:Protein modification; BP00064:Protein phosphorylation
PKP1	chr1:201235977-201236377,chr1:201237181-201237581,chr1:201237707-201238171	8	BP00102:Signal transduction; BP00124:Cell adhesion; BP00274:Cell communication
PKP3	chr11:393224-393624	8	BP00102:Signal transduction; BP00124:Cell adhesion; BP00274:Cell communication
PLAT	chr8:42033888-42034288,chr8:42037688-42038088,chr8:42063211-42063611,chr8:42064851-42065306	1,4
PLAU	chr10:75666615-75667036,chr10:75671098-75671765,chr10:75672878-75673278,chr10:75677355-75677755,chr10:75725621-75726142	8	BP00102:Signal transduction; BP00274:Cell communication; BP00285:Cell structure and motility; BP00287:Cell motility
PLCB4	chr20:9048361-9048770,chr20:9267081-9267481,chr20:9465171-9465571,chr20:9467521-9468001	4
PLCH2	chr1:2383287-2383687	4
PLEKHA2	chr8:38759174-38759634	14
PLEKHG4	chr16:67291611-67292011,chr16:67304322-67304722,chr16:67311372-67311772,chr16:67311902-67312342,chr16:67312652-67313052,chr16:67313332-67313732	8
PLEKHG5	chr1:6551487-6551887,chr1:6551524-6551924	4,8	BP00016:Amino acid transport; BP00102:Signal transduction; BP00124:Cell adhesion; BP00129:Endocytosis; BP00203:Cell cycle; BP00285:Cell structure and motility
PLEKHG6	chr12:6339816-6340386,chr12:6427297-6428077	15	BP00102:Signal transduction; BP00179:Apoptosis; BP00277:Phagocytosis; BP00285:Cell structure and motility
PLEKHO1	chr1:150133860-150134260,chr1:150134530-150134930,chr1:150166909-150167309,chr1:150186260-150186660	8
PLIN1	chr15:90222352-90222752	15	BP00019:Lipid, fatty acid and steroid metabolism; BP00027:Regulation of lipid, fatty acid and steroid metabolism; hsa03320:PPAR signaling pathway
PLIN2	chr9:19114084-19114484,chr9:19114747-19115257,chr9:19123344-19123744	15	BP00019:Lipid, fatty acid and steroid metabolism; BP00027:Regulation of lipid, fatty acid and steroid metabolism
PLIN3	chr19:4852002-4852442	4
PLIN4	chr19:4516585-4516985,chr19:4518215-4518615	15
PLK2	chr5:57120472-57120872,chr5:57748316-57748864,chr5:57748874-57749402,chr5:57754636-57755554	8	BP00063:Protein modification; BP00064:Protein phosphorylation; BP00102:Signal transduction; BP00111:Intracellular signaling cascade; BP00193:Developmental processes; BP00224:Cell proliferation and differentiation; BP00242:Embryogenesis
PLK3	chr1:45274797-45275492,chr1:45285782-45286227	9	BP00064:Protein phosphorylation
PLOD2	chr3:145762509-145762909,chr3:145835349-145835749	9
PLS3	chrX:114796752-114797152,chrX:114849231-114849649	8	BP00285:Cell structure and motility; BP00286:Cell structure
PLXNA1	chr3:126500583-126501060,chr3:126501223-126501720,chr3:126701230-126701701	8	BP00063:Protein modification; BP00064:Protein phosphorylation; BP00102:Signal transduction; BP00108:Receptor protein tyrosine kinase signaling pathway; BP00193:Developmental processes; hsa04360:Axon guidance
PLXNA4	chr7:132086646-132087238,chr7:132087268-132088218	13	BP00064:Protein phosphorylation; BP00102:Signal transduction; BP00103:Cell surface receptor mediated signal transduction; BP00108:Receptor protein tyrosine kinase signaling pathway; BP00193:Developmental processes
PLXND1	chr3:129442667-129443067	13	BP00064:Protein phosphorylation; BP00102:Signal transduction; BP00103:Cell surface receptor mediated signal transduction; BP00108:Receptor protein tyrosine kinase signaling pathway; BP00193:Developmental processes
PNRC1	chr6:89744956-89745356,chr6:89796223-89796920	13
POC1A	chr3:52124221-52124621	1
PODXL	chr7:131241046-131241846	1
POLD2	chr7:44151775-44152175,chr7:44153365-44154145	8,9
POLDIP2	chr17:26674391-26675007,chr17:26675061-26675461,chr17:26676011-26676411,chr17:26677301-26677701	4
POLL	chr10:103335561-103335961	4	BP00203:Cell cycle
POLR2B	chr4:57886457-57886857,chr4:57888351-57888751,chr4:57889891-57890291	8
POPDC3	chr6:105627550-105627962	13	BP00193:Developmental processes; BP00248:Mesoderm development
PORCN	chrX:48345923-48346443	4
POSTN	chr13:37799792-37800332,chr13:37880751-37881151,chr13:37960484-37960884,chr13:37978177-37978577,chr13:38020341-38020741,chr13:38059755-38060155,chr13:38060215-38060615,chr13:38063185-38063645,chr13:38067205-38067769,chr13:38171745-38172145	10	BP00124:Cell adhesion; BP00193:Developmental processes; BP00248:Mesoderm development
POU2F2	chr19:42617722-42618122	8	BP00193:Developmental processes
PPAP2B	chr1:56957306-56957706,chr1:57043896-57044296,chr1:57044416-57044816	14	BP00102:Signal transduction; BP00103:Cell surface receptor mediated signal transduction
PPARG	chr3:12392056-12392456,chr3:12392826-12393226	15	BP00001:Carbohydrate metabolism; BP00019:Lipid, fatty acid and steroid metabolism; BP00027:Regulation of lipid, fatty acid and steroid metabolism; BP00102:Signal transduction; BP00148:Immunity and defense; hsa03320:PPAR signaling pathway
PPARGC1A	chr4:23890499-23890899,chr4:24105251-24105651,chr4:24107131-24107531,chr4:24449358-24449758	15	BP00019:Lipid, fatty acid and steroid metabolism; BP00027:Regulation of lipid, fatty acid and steroid metabolism; hsa04910:Insulin signaling pathway; hsa04920:Adipocytokine signaling pathway
PPFIBP1	chr12:27702595-27702995,chr12:27727097-27727497	4,8
PPIL2	chr22:22006320-22006720,chr22:22011660-22012078	4
PPM1F	chr22:22272263-22272663	4	BP00063:Protein modification
PPM1G	chr2:27632956-27633356	4	BP00063:Protein modification
PPP1CB	chr2:28887884-28888357,chr2:28939284-28939684,chr2:28940224-28940624,chr2:28975125-28975527	15	BP00001:Carbohydrate metabolism; BP00179:Apoptosis; BP00285:Cell structure and motility; hsa04910:Insulin signaling pathway
PPP1R12A	chr12:80176068-80176468,chr12:80222860-80223260,chr12:80330420-80330820	4,9	BP00063:Protein modification; BP00064:Protein phosphorylation; hsa04270:Vascular smooth muscle contraction; hsa04510:Focal adhesion; hsa04810:Regulation of actin cytoskeleton
PPP1R13L	chr19:45888677-45889077	8	BP00207:Cell cycle control; BP00224:Cell proliferation and differentiation
PPP1R14A	chr19:38742345-38742793,chr19:38743803-38744203,chr19:38746755-38747183	14
PPP1R14B	chr11:64013273-64013700,chr11:64016243-64016643	8	BP00063:Protein modification; BP00064:Protein phosphorylation
PPP1R18	chr6:30650350-30650851,chr6:30653871-30654271	8
PPP1R3C	chr10:93391641-93392140	14
PPP2R1B	chr11:111577931-111578331,chr11:111601739-111602139	13	hsa04310:Wnt signaling pathway; hsa04350:TGF-beta signaling pathway
PPP2R4	chr9:131901507-131901969,chr9:131903027-131903436,chr9:131904307-131904707,chr9:131905367-131905767,chr9:131908167-131908567	8	BP00063:Protein modification
PPP2R5C	chr14:102276400-102276887,chr14:102395410-102395810	4	BP00063:Protein modification
PRDM1	chr6:106258285-106258685	15
PRDM16	chr1:3230212-3230612	4
PRDM8	chr4:81104571-81104971,chr4:81159294-81159739	4
PRIM1	chr12:57145836-57146244	1	hsa00240:Pyrimidine metabolism; hsa03030:DNA replication
PRKAR1A	chr17:66508900-66509611,chr17:66529604-66530004,chr17:66530924-66531324,chr17:66532684-66533084,chr17:66535644-66536044,chr17:66536184-66536664,chr17:66538844-66539317	15	BP00102:Signal transduction; hsa04910:Insulin signaling pathway
PRKCA	chr17:64463039-64463612,chr17:64808224-64808624	8	BP00063:Protein modification; BP00064:Protein phosphorylation; BP00102:Signal transduction; BP00111:Intracellular signaling cascade; BP00112:Calcium mediated signaling; BP00224:Cell proliferation and differentiation; hsa04020:Calcium signaling pathway; hsa04070:Phosphatidylinositol signaling system; hsa04510:Focal adhesion; hsa04530:Tight junction; hsa04666:Fc gamma R-mediated phagocytosis; hsa04…
PRKCDBP	chr11:6340193-6340677,chr11:6341093-6341493,chr11:6342047-6342447	8
PRKCH	chr14:61937617-61938017,chr14:61938287-61939067,chr14:62035810-62036210,chr14:62036420-62036874,chr14:62076147-62076547,chr14:62082977-62083377	14	BP00064:Protein phosphorylation; BP00102:Signal transduction; BP00111:Intracellular signaling cascade; BP00112:Calcium mediated signaling; BP00224:Cell proliferation and differentiation
PRKCSH	chr19:11546767-11547171	4	BP00063:Protein modification; BP00067:Protein glycosylation
PRMT2	chr21:48078739-48079139	4	BP00063:Protein modification
PRNP	chr20:4666629-4667029,chr20:4683539-4683939	9
PRPSAP1	chr17:74349322-74349722	9
PRSS12	chr4:119200200-119200600,chr4:119201796-119202396,chr4:119202010-119202410,chr4:119203096-119203496,chr4:119273930-119274330,chr4:119273964-119274364	1,4
PRSS23	chr11:86433153-86433553,chr11:86453776-86454176,chr11:86495324-86495724,chr11:86496214-86496774,chr11:86510759-86511159,chr11:86511655-86512055,chr11:86512335-86512735,chr11:86512765-86513165,chr11:86572916-86573316,chr11:86630101-86630501	10
PRUNE2	chr9:79475925-79476325,chr9:79508485-79508885,chr9:79521125-79521525	13
PSAT1	chr9:80911111-80911516,chr9:80945961-80946361,chr9:80946431-80946831,chr9:80947371-80947771	10	BP00013:Amino acid metabolism; BP00014:Amino acid biosynthesis; hsa00260:Glycine, serine and threonine metabolism
PTGDR	chr14:52707887-52708287,chr14:52733562-52733962,chr14:52734112-52734512,chr14:52735342-52735742,chr14:52751363-52751763,chr14:52753543-52753943	10	BP00102:Signal transduction
PTGER1	chr19:14585973-14586373,chr19:14586418-14586818	8	BP00102:Signal transduction; BP00173:Muscle contraction; hsa04020:Calcium signaling pathway
PTGFR	chr1:78695055-78695538,chr1:78956487-78956940,chr1:78957217-78957690,chr1:78991157-78991557,chr1:79007547-79008147	15	BP00102:Signal transduction; BP00103:Cell surface receptor mediated signal transduction
PTGIS	chr20:48119790-48120190,chr20:48178853-48179253,chr20:48190543-48190943,chr20:48196893-48197293	8
PTHLH	chr12:27996959-27997359,chr12:28121972-28122732,chr12:28122882-28123282	10	BP00193:Developmental processes; BP00201:Skeletal development; BP00248:Mesoderm development
PTPDC1	chr9:96902092-96902492	9	BP00064:Protein phosphorylation
PTPN14	chr1:214601252-214601652,chr1:214618432-214618832,chr1:214620382-214620857	8	BP00063:Protein modification; BP00193:Developmental processes; BP00285:Cell structure and motility; BP00287:Cell motility
PTPRC	chr1:198651528-198651928	4	BP00063:Protein modification
PTPRF	chr1:43996369-43996769	8	BP00063:Protein modification; BP00064:Protein phosphorylation; BP00102:Signal transduction; BP00120:Cell adhesion-mediated signaling; BP00124:Cell adhesion; BP00193:Developmental processes; BP00274:Cell communication; BP00285:Cell structure and motility; hsa04514:Cell adhesion molecules (CAMs)
PTPRG	chr3:61547948-61548348,chr3:61548493-61548893,chr3:61548973-61549373,chr3:61549643-61550043,chr3:61550033-61550823,chr3:61568902-61569302,chr3:61621491-61621891,chr3:61630972-61631372,chr3:61634181-61634581,chr3:61648242-61648642,chr3:61668762-61669162,chr3:61670022-61670422,chr3:61671092-61671492,chr3:61674232-61674632,chr3:61728652-61729052,chr3:61733572-61733972,chr3:61751116-61751516,chr3:617…	13,15	BP00064:Protein phosphorylation; BP00102:Signal transduction; BP00103:Cell surface receptor mediated signal transduction; BP00193:Developmental processes
PTPRJ	chr11:48102805-48103251	1	hsa04520:Adherens junction
PTRF	chr17:40552166-40552566	8
PTX3	chr3:156978965-156979678,chr3:157013979-157014379,chr3:157154480-157154918,chr3:157157158-157157558,chr3:157160298-157160898,chr3:157162020-157162472,chr3:157163568-157163968	13
PVR	chr19:45150492-45150892,chr19:45160288-45160688,chr19:45166402-45166802,chr19:45168118-45168558,chr19:45168858-45169352	8	BP00102:Signal transduction; BP00120:Cell adhesion-mediated signaling; BP00274:Cell communication; hsa04514:Cell adhesion molecules (CAMs)
PXDC1	chr6:3717798-3718198,chr6:3718368-3718768,chr6:3719797-3720197	8
PXN	chr12:120668472-120668872,chr12:120668548-120668963,chr12:120669093-120669553,chr12:120672575-120673053,chr12:120676378-120676778,chr12:120700802-120701265	1,4	BP00285:Cell structure and motility; BP00287:Cell motility; hsa04510:Focal adhesion; hsa04810:Regulation of actin cytoskeleton
PYCR1	chr17:79888946-79889346,chr17:79889621-79890090	10	BP00013:Amino acid metabolism; BP00014:Amino acid biosynthesis
PYGB	chr20:25227730-25228130,chr20:25230146-25230546,chr20:25272886-25273286,chr20:25280296-25280740,chr20:25281022-25281580,chr20:25281996-25282622	15	BP00001:Carbohydrate metabolism; hsa04910:Insulin signaling pathway
QSOX1	chr1:180171001-180171541,chr1:180172715-180173115,chr1:180173301-180173775,chr1:180176605-180177005	8	BP00063:Protein modification
R3HCC1	chr8:23149081-23149495,chr8:23150105-23150505,chr8:23201785-23202357,chr8:23202545-23202945	8
RAB11FIP5	chr2:73316523-73316961,chr2:73332821-73333221,chr2:73338623-73339023,chr2:73404301-73404775,chr2:73404348-73404748	4,8
RAB20	chr13:111211969-111212369,chr13:111213011-111213671,chr13:111213749-111214511	13	BP00102:Signal transduction; BP00111:Intracellular signaling cascade
RAB31	chr18:9684461-9684861,chr18:9685221-9685621,chr18:9708216-9708616,chr18:9709184-9709815,chr18:9711844-9712244,chr18:9721786-9722251,chr18:9742315-9742715,chr18:9787526-9787926,chr18:9827996-9828396,chr18:9866057-9866734,chr18:9866924-9867324	15	BP00102:Signal transduction
RAB40A	chrX:102772568-102772968	13	BP00102:Signal transduction; BP00111:Intracellular signaling cascade
RABEP2	chr16:28914143-28914543	4
RABGEF1	chr7:66281018-66281418,chr7:66281238-66281638	4,8	BP00129:Endocytosis; BP00136:Other intracellular protein traffic
RACGAP1	chr12:50418960-50419387	1
RAD51AP1	chr12:4647870-4648322	3
RAD54L	chr1:46712879-46713339	6	BP00031:Nucleoside, nucleotide and nucleic acid metabolism
RAI14	chr5:34053277-34053697,chr5:34571121-34571521,chr5:34666495-34666895,chr5:34789425-34789825	8
RALA	chr7:39748839-39749239,chr7:39749319-39749996,chr7:39750386-39750786	8	BP00102:Signal transduction; BP00193:Developmental processes; BP00242:Embryogenesis; BP00285:Cell structure and motility; BP00287:Cell motility; hsa05200:Pathways in cancer
RANGAP1	chr22:41681457-41681886,chr22:41684417-41684817	1
RAPGEF3	chr12:48130960-48131360	1
RASA1	chr5:86316034-86316434,chr5:86416119-86416852,chr5:86564077-86564730,chr5:86568101-86568501,chr5:86568621-86569021,chr5:86590140-86590540	8	BP00102:Signal transduction; hsa04360:Axon guidance
RASD1	chr17:17396850-17397347,chr17:17398210-17398634	15	BP00102:Signal transduction
RASL10B	chr17:34053060-34053460,chr17:34062516-34062916,chr17:34063176-34063576,chr17:34068396-34068796	13	BP00102:Signal transduction; BP00103:Cell surface receptor mediated signal transduction
RASSF1	chr3:50378349-50378749	4	hsa05200:Pathways in cancer; hsa05219:Bladder cancer
RASSF4	chr10:45445666-45446066,chr10:45453466-45453866	15	BP00102:Signal transduction; BP00179:Apoptosis
RASSF7	chr11:563420-563820,chr11:564072-564472,chr11:567862-568262	14
RBM43	chr2:151768254-151768654	9
RBMS1	chr2:161244449-161244849,chr2:161277049-161277449	14
RBPJ	chr4:26328384-26328784,chr4:26370791-26371191,chr4:26459750-26460150	4,8
RCE1	chr11:66610146-66610559,chr11:66611106-66611506	15
RCL1	chr9:4792403-4793195,chr9:4833910-4834310,chr9:4837540-4837940,chr9:4838390-4838790,chr9:4847550-4847950,chr9:4849260-4849660,chr9:4850680-4851080,chr9:4855650-4856121,chr9:4893554-4893954	15
RDH5	chr12:56110095-56110495	4
RECK	chr9:36040327-36040727,chr9:36074878-36075278	8
REEP4	chr8:21998741-21999141	4
REV3L	chr6:111617175-111617575,chr6:111802755-111803347,chr6:111803358-111803838,chr6:111911258-111911781,chr6:111912761-111913161,chr6:111913441-111913841,chr6:111923141-111923571,chr6:111924121-111924521	13
RFX8	chr2:102090841-102091241,chr2:102091290-102091784	4
RGMB	chr5:98109930-98110362,chr5:98131993-98132496	4
RGS19	chr20:62695696-62696096	8	BP00102:Signal transduction
RGS2	chr1:192777972-192778817,chr1:192781827-192782447	15	BP00102:Signal transduction; BP00103:Cell surface receptor mediated signal transduction
RGS3	chr9:116327521-116327921	9
RGS4	chr1:162954561-162955331	4
RHBDF2	chr17:74489202-74489602	8
RHOC	chr1:113243339-113243739,chr1:113247439-113248169	4	BP00285:Cell structure and motility
RHOQ	chr2:46781433-46781833	12	BP00285:Cell structure and motility
RIN1	chr11:66103227-66103627	1
RIN2	chr20:19765241-19765720,chr20:19870128-19870528,chr20:19955641-19956169	4	BP00136:Other intracellular protein traffic
RIN3	chr14:92977787-92978187,chr14:92979524-92980027,chr14:92980447-92980861,chr14:93114084-93114484,chr14:93160909-93161309,chr14:93164231-93164631	8	BP00129:Endocytosis
RIPK4	chr21:43187028-43187428	9	BP00064:Protein phosphorylation
RND3	chr2:151352702-151353102,chr2:151383487-151383887,chr2:151386067-151386467	8	BP00102:Signal transduction; BP00285:Cell structure and motility
RNF166	chr16:88761749-88762149	4
RNF167	chr17:4846179-4846579	4
RNF215	chr22:30777352-30777752	15
RNF26	chr11:119208260-119208924	4	BP00063:Protein modification
RNF32	chr7:156459667-156460067	14
ROR1	chr1:64128355-64128755,chr1:64358382-64358782,chr1:64394432-64394832	8	BP00063:Protein modification; BP00064:Protein phosphorylation; BP00102:Signal transduction; BP00108:Receptor protein tyrosine kinase signaling pathway
ROR2	chr9:94483091-94483491,chr9:94533272-94533672,chr9:94564752-94565152,chr9:94712171-94712571	13,15	BP00064:Protein phosphorylation; BP00102:Signal transduction; BP00103:Cell surface receptor mediated signal transduction; BP00108:Receptor protein tyrosine kinase signaling pathway
RORA	chr15:61520203-61520607	13	BP00102:Signal transduction; BP00193:Developmental processes
ROS1	chr6:117744958-117745358,chr6:117763209-117763609	13	BP00064:Protein phosphorylation; BP00102:Signal transduction; BP00103:Cell surface receptor mediated signal transduction; BP00108:Receptor protein tyrosine kinase signaling pathway; BP00193:Developmental processes
RPL14	chr3:40505964-40506364	6	hsa03010:Ribosome
RPL21	chr13:27826359-27826759	6	hsa03010:Ribosome
RPL23	chr17:37009257-37009657	6	hsa03010:Ribosome
RPL28	chr19:55911003-55911403	6	hsa03010:Ribosome
RPS29	chr14:50048797-50049197	6	hsa03010:Ribosome
RPS6KA4	chr11:64122718-64123118,chr11:64140401-64141008	4	BP00063:Protein modification; BP00203:Cell cycle
RRM1	chr11:4116214-4116614	1	hsa00240:Pyrimidine metabolism
RRM2	chr2:10260252-10261107,chr2:10422666-10423066	4
RTL1	chr14:101468014-101468414,chr14:101539608-101540008,chr14:101541244-101541644	8
RTN4RL1	chr17:1811468-1811868,chr17:1926966-1927366	15	BP00102:Signal transduction; BP00103:Cell surface receptor mediated signal transduction; BP00110:Other receptor mediated signaling pathway
RTN4RL2	chr11:57244176-57244576	15	BP00102:Signal transduction; BP00103:Cell surface receptor mediated signal transduction; BP00110:Other receptor mediated signaling pathway
RUNX1T1	chr8:93113550-93114064,chr8:93114890-93115290	8,9	hsa05200:Pathways in cancer
RUSC2	chr9:35518705-35519105,chr9:35538135-35538911	8
RYBP	chr3:72420137-72420537,chr3:72422757-72423157	14
S100A10	chr1:151961124-151961524,chr1:151961883-151962364,chr1:152003131-152003531	8	BP00193:Developmental processes
S100A16	chr1:153575877-153576277	8
S100A2	chr1:153538199-153538662,chr1:153581228-153581926	4
S1PR1	chr1:101701876-101702308,chr1:101702316-101702716,chr1:101702919-101703319,chr1:101704125-101704629	15	BP00102:Signal transduction; BP00103:Cell surface receptor mediated signal transduction
SACS	chr13:23946507-23946907	8
SALL4	chr20:50417782-50418182,chr20:50601385-50601785,chr20:50621333-50621733	10	BP00193:Developmental processes
SAMD9	chr7:92747104-92747544	11
SAMHD1	chr20:35515250-35515650,chr20:35517490-35517890	15	BP00148:Immunity and defense
SAMSN1	chr21:16430438-16430838	14
SAP25	chr7:100154005-100154459,chr7:100167742-100168142,chr7:100168842-100169402	15
SAP30	chr4:174292945-174293345	15
SARS	chr1:109757305-109757749,chr1:109784566-109784966	10	BP00074:Amino acid activation; hsa00970:Aminoacyl-tRNA biosynthesis
SARS2	chr19:39408459-39408859	1
SASH3	chrX:128926921-128927321,chrX:128927811-128928215	15
SAT1	chrX:23801663-23802063,chrX:23804893-23805413	15	BP00289:Other metabolism
SAV1	chr14:51091838-51092238,chr14:51182829-51183229,chr14:51229893-51230362,chr14:51230432-51230832,chr14:51230833-51231233,chr14:51239003-51239403,chr14:51240293-51240693,chr14:51241513-51241913,chr14:51242143-51242543	13,15	BP00102:Signal transduction
SCAMP1	chr5:77812341-77812741	10
SCARA5	chr8:27805809-27806209	15
SCD	chr10:102100865-102101265,chr10:102106583-102107163	13	hsa01040:Biosynthesis of unsaturated fatty acids; hsa03320:PPAR signaling pathway
SCFD2	chr4:54172680-54173080,chr4:54331793-54332193	4
SCG5	chr15:32933784-32934184	1
SCN8A	chr12:51984971-51985371,chr12:51985431-51985831,chr12:51985981-51986407,chr12:52080445-52080845,chr12:52115379-52115779,chr12:52207712-52208112,chr12:52207757-52208157	8,9
SCNN1A	chr12:6456597-6457060,chr12:6485617-6486507	13
SDC1	chr2:20473809-20474209	4	BP00285:Cell structure and motility
SDC2	chr8:97350064-97350464,chr8:97627047-97627447	10	BP00124:Cell adhesion; BP00193:Developmental processes; BP00201:Skeletal development; BP00248:Mesoderm development; hsa04512:ECM-receptor interaction
SEC14L2	chr22:30793430-30794380,chr22:30818336-30818736,chr22:30820536-30820970,chr22:30821613-30822040,chr22:30825532-30825932	15	BP00019:Lipid, fatty acid and steroid metabolism
SEC16A	chr9:139391197-139391597	4
SEC24D	chr4:119640634-119641034	8
SEC61B	chr9:101984803-101985203	4
SELPLG	chr12:109029313-109029713,chr12:109033363-109034091,chr12:109035591-109035991,chr12:109047725-109048125,chr12:109048275-109048675	1
SEMA4A	chr1:156094751-156095151,chr1:156094773-156095173,chr1:156095941-156096461,chr1:156099871-156100373,chr1:156113471-156113871,chr1:156114591-156114991,chr1:156114911-156115311,chr1:156115371-156115771,chr1:156116267-156116867,chr1:156117427-156117887	4,8	BP00102:Signal transduction; BP00108:Receptor protein tyrosine kinase signaling pathway; BP00193:Developmental processes; hsa04360:Axon guidance
SEMA7A	chr15:74677534-74677934,chr15:74753515-74753915	1,4
SERAC1	chr6:158502027-158502427,chr6:158532035-158532435,chr6:158532925-158533325,chr6:158533695-158534095,chr6:158534315-158534715,chr6:158534805-158535205,chr6:158536345-158537092,chr6:158538085-158538485	8
SERF2	chr15:44084794-44085576,chr15:44089196-44089634	4
SERINC2	chr1:31883262-31883662,chr1:31908289-31908689	1,3
SERPINA3	chr14:95068172-95068572	12
SERPINB2	chr18:61554787-61555187	1
SERPINE1	chr7:100771565-100771965,chr7:100773535-100773935,chr7:100775235-100775635,chr7:100782925-100783325	8
SERPINF1	chr17:1665214-1665614,chr17:1666336-1666736,chr17:1667506-1667906,chr17:1685726-1686126,chr17:1686954-1687409	15
SERPING1	chr11:57365316-57365852,chr11:57374199-57374599	15	hsa04610:Complement and coagulation cascades
SESN1	chr6:109198638-109199038	13	BP00207:Cell cycle control
SESN2	chr1:28575845-28576245,chr1:28613507-28613907,chr1:28613925-28614367	10
SESN3	chr11:94963308-94963708	14
SF3A2	chr19:2231637-2232093,chr19:2232140-2232540,chr19:2232737-2233520,chr19:2233767-2234167,chr19:2236707-2237107	4
SFXN3	chr10:102800843-102801332	4
SGIP1	chr1:66840599-66840999,chr1:66943149-66943897,chr1:66998837-66999309,chr1:66999114-66999514	1,4
SH2B3	chr12:111847128-111847546,chr12:111851251-111851651	8	BP00102:Signal transduction; BP00108:Receptor protein tyrosine kinase signaling pathway; BP00111:Intracellular signaling cascade; BP00112:Calcium mediated signaling; BP00119:Other intracellular signaling cascade; BP00285:Cell structure and motility; BP00286:Cell structure
SH2D4A	chr8:18940263-18940663,chr8:18940773-18941173,chr8:18992030-18992461,chr8:18993070-18993470,chr8:18998692-18999194,chr8:19029047-19029447,chr8:19066880-19067280,chr8:19170379-19170779	8
SH3PXD2B	chr5:171839586-171840383,chr5:171845431-171845831,chr5:171860401-171860801,chr5:171879871-171880456,chr5:171881063-171881463	15	BP00102:Signal transduction
SH3RF1	chr4:170079499-170079899	4
SH3RF3	chr2:109746079-109746479,chr2:109762619-109763019,chr2:109781639-109782039,chr2:109812049-109812449,chr2:109911472-109911872,chr2:109941196-109941596,chr2:109947538-109947938,chr2:109948196-109948600,chr2:110051044-110051444,chr2:110052944-110053344,chr2:110055304-110055704,chr2:110089474-110089874,chr2:110263607-110264135,chr2:110267717-110268117	14
SHB	chr9:37913591-37913991,chr9:38002228-38002628,chr9:38067357-38067788,chr9:38068168-38068568	8
SHCBP1	chr16:46654970-46655397	1
SHKBP1	chr19:41075773-41076553,chr19:41076466-41076866,chr19:41089364-41089764	4,8
SHMT1	chr17:18266586-18266986	1
SHMT2	chr12:57624400-57624800,chr12:57628980-57629380,chr12:57632164-57632564,chr12:57633004-57633404,chr12:57634020-57634424	10,11	BP00013:Amino acid metabolism; hsa00260:Glycine, serine and threonine metabolism
SIGIRR	chr11:416842-417242	8
SIGLEC11	chr19:50486780-50487180	4
SIGLEC15	chr18:43307097-43307497,chr18:43328687-43329087,chr18:43329167-43329647,chr18:43330007-43330507,chr18:43332517-43332917,chr18:43351297-43351697,chr18:43354376-43354777,chr18:43363267-43363766,chr18:43382577-43382977,chr18:43421468-43421921,chr18:43424498-43424898,chr18:43427128-43427528	4
SIK2	chr11:111473101-111473501,chr11:111473569-111473969,chr11:111495461-111495999,chr11:111542769-111543169	13	BP00064:Protein phosphorylation; BP00207:Cell cycle control
SIPA1L1	chr14:71708901-71709301,chr14:71995878-71996278,chr14:71999378-71999778,chr14:72109626-72110026,chr14:72209315-72209715	4,9
SIPA1L3	chr19:38422842-38423242	1
SIRPA	chr20:1789888-1790302,chr20:1791898-1792322,chr20:1840911-1841311,chr20:1842291-1842761,chr20:1866838-1867238,chr20:1869191-1869591	8	BP00102:Signal transduction
SIX1	chr14:61109123-61109523,chr14:61109564-61109964,chr14:61110184-61110584,chr14:61113283-61114334	15
SKA2	chr17:57231670-57232103,chr17:57232144-57232730	1
SLA	chr8:134088620-134089020	13	BP00102:Signal transduction; BP00103:Cell surface receptor mediated signal transduction; BP00108:Receptor protein tyrosine kinase signaling pathway
SLC12A6	chr15:34519695-34520095,chr15:34530925-34531325,chr15:34531395-34531795,chr15:34629202-34629602,chr15:34629932-34630332	8
SLC14A1	chr18:42828580-42828980,chr18:43303987-43304404	4
SLC16A6	chr17:66286710-66287110,chr17:66373582-66373982,chr17:66374210-66374872,chr17:66374952-66375352,chr17:66394998-66395398,chr17:66451872-66452272	13
SLC17A9	chr20:61600142-61600542,chr20:61600572-61600972	8
SLC19A2	chr1:169429626-169430186,chr1:169430326-169430726,chr1:169454422-169454846	13
SLC1A4	chr2:65244998-65245398,chr2:65251688-65252088	10,9	BP00013:Amino acid metabolism; BP00016:Amino acid transport; BP00102:Signal transduction; BP00122:Ligand-mediated signaling; BP00274:Cell communication
SLC1A5	chr19:47276267-47276667,chr19:47279895-47280295,chr19:47287827-47288227	11
SLC1A7	chr1:53611998-53612414	8	BP00016:Amino acid transport; BP00102:Signal transduction; BP00274:Cell communication
SLC20A1	chr2:113402594-113403005,chr2:113403915-113404315,chr2:113404445-113404845,chr2:113416435-113416835,chr2:113422285-113422685,chr2:113422773-113423260,chr2:113423925-113424325	8
SLC22A15	chr1:116519390-116519790,chr1:116520080-116520517,chr1:116610207-116610607,chr1:116619359-116619759,chr1:116620219-116620619,chr1:116652998-116653398,chr1:116653678-116654078	10
SLC22A2	chr6:160647022-160647422	10
SLC22A23	chr6:3295518-3295918,chr6:3341616-3342016,chr6:3355808-3356251,chr6:3356338-3356821,chr6:3360851-3361251,chr6:3390601-3391001,chr6:3456117-3456517	15
SLC25A18	chr22:18049919-18050319	15
SLC25A4	chr4:186069725-186070125	6	BP00031:Nucleoside, nucleotide and nucleic acid metabolism
SLC26A9	chr1:205900136-205900536,chr1:205902946-205903346,chr1:205920489-205920889	15
SLC29A1	chr6:44190910-44191650,chr6:44192000-44192400	8	BP00224:Cell proliferation and differentiation
SLC2A1	chr1:43390518-43390966,chr1:43391018-43391514	6	hsa04920:Adipocytokine signaling pathway; hsa05200:Pathways in cancer
SLC31A1	chr9:115984773-115985173	10
SLC38A1	chr12:46575174-46575918	9
SLC38A4	chr12:47167668-47168068,chr12:47219498-47219933	13
SLC38A5	chrX:48326476-48326948	9
SLC39A13	chr11:47430493-47430893	4
SLC44A1	chr9:108163956-108164599	13
SLC47A2	chr17:19580059-19580459	13
SLC4A11	chr20:3219561-3219961,chr20:3220176-3220576,chr20:3293756-3294156	15	BP00285:Cell structure and motility
SLC4A4	chr4:72052327-72052758,chr4:72053387-72053787,chr4:72209357-72209757,chr4:72219197-72219597,chr4:72443908-72444308	1
SLC4A5	chr2:74441886-74442286,chr2:74448590-74448990	11,12
SLC5A10	chr17:18907144-18907587	4
SLC5A3	chr21:35216554-35216954	15	BP00001:Carbohydrate metabolism; BP00289:Other metabolism
SLC6A6	chr3:14498290-14498690	13	BP00146:Extracellular transport and import
SLC6A9	chr1:44458519-44458919,chr1:44459459-44459859,chr1:44460419-44460819,chr1:44460904-44461304	10	BP00013:Amino acid metabolism; BP00016:Amino acid transport
SLC7A1	chr13:30079674-30080075,chr13:30080684-30081084,chr13:30081514-30082164,chr13:30082210-30082744,chr13:30162954-30163354,chr13:30168865-30169394	8	BP00016:Amino acid transport
SLC7A11	chr4:139162304-139162704	14
SLC7A5	chr16:87840302-87840702,chr16:87883749-87884149	8	BP00016:Amino acid transport
SLC8A1	chr2:40261285-40261685,chr2:40328113-40328513,chr2:40627771-40628171	4	hsa05410:Hypertrophic cardiomyopathy (HCM); hsa05414:Dilated cardiomyopathy
SLFNL1	chr1:41483050-41483450	1
SMAD3	chr15:67336494-67336894,chr15:67417472-67417872	8	BP00102:Signal transduction; BP00111:Intracellular signaling cascade; BP00119:Other intracellular signaling cascade; BP00193:Developmental processes; BP00274:Cell communication; hsa05200:Pathways in cancer
SMAD6	chr15:66999941-67000341,chr15:67002081-67002481,chr15:67003525-67003941,chr15:67052431-67052831,chr15:67055711-67056111,chr15:67061221-67061621,chr15:67063621-67064021,chr15:67077190-67078005,chr15:67078081-67078661,chr15:67079331-67079931,chr15:67228328-67228908	6	BP00031:Nucleoside, nucleotide and nucleic acid metabolism
SMAD7	chr18:46276305-46276705,chr18:46354355-46354800,chr18:46355035-46355435,chr18:46360220-46360620,chr18:46377205-46377655,chr18:46557468-46557868	9
SMAGP	chr12:51663861-51664955	4
SMARCD2	chr17:61918969-61919410	15
SMC2	chr9:106856494-106857164	1
SMC4	chr3:160117853-160118361,chr3:160118426-160118826,chr3:160153432-160153906	4	BP00203:Cell cycle; BP00206:Chromosome segregation; BP00273:Chromatin packaging and remodeling; BP00282:Mitosis
SMG9	chr19:44257961-44258841,chr19:44267541-44267941,chr19:44269171-44269571	8
SMOX	chr20:4173056-4174116,chr20:4175129-4175529,chr20:4175816-4176216	15	BP00289:Other metabolism
SMS	chrX:21961810-21962210	1
SMTN	chr22:31477857-31478420,chr22:31500767-31501167,chr22:31501660-31502060	4
SMURF2	chr17:62583594-62583994,chr17:62584164-62584564,chr17:62656160-62656560,chr17:62658449-62658870	4
SMYD2	chr1:214505236-214505757,chr1:214506567-214506967	8
SMYD4	chr17:1685654-1686054,chr17:1686549-1686949	13
SNAI2	chr8:49831250-49831668,chr8:49832070-49832470,chr8:49832806-49833326	13
SNCAIP	chr5:121647779-121648179,chr5:121648289-121648689,chr5:121836093-121836493	15
SNED1	chr2:241987823-241988223,chr2:242002412-242002900,chr2:242003023-242003463	15	BP00102:Signal transduction; BP00148:Immunity and defense; BP00285:Cell structure and motility
SNX25	chr4:186159855-186160255	8	BP00102:Signal transduction; BP00111:Intracellular signaling cascade; BP00119:Other intracellular signaling cascade; BP00274:Cell communication
SOAT2	chr12:53492466-53492892,chr12:53492962-53493362,chr12:53497142-53497602	8
SOCS5	chr2:46927632-46928032,chr2:46928192-46928592,chr2:46931292-46931692,chr2:46967145-46967545,chr2:46993322-46993722,chr2:46994512-46995302,chr2:46995672-46996072,chr2:46999552-46999952,chr2:47000972-47001372,chr2:47006731-47007131,chr2:47027107-47027547,chr2:47029586-47029986,chr2:47030756-47031536,chr2:47033766-47034166,chr2:47039436-47039946,chr2:47054850-47055250,chr2:47075013-47075413,chr2:470…	8,9	BP00102:Signal transduction; BP00108:Receptor protein tyrosine kinase signaling pathway; BP00274:Cell communication
SOD2	chr6:160033099-160033659,chr6:160085408-160085808,chr6:160086788-160087188,chr6:160098111-160098511,chr6:160114019-160114421	15	BP00148:Immunity and defense
SOLH	chr16:578576-579001	4
SORBS2	chr4:186504154-186504554,chr4:186522410-186522810,chr4:186563866-186564266,chr4:186564976-186565376,chr4:186577656-186578058,chr4:186578338-186578738,chr4:186589847-186590247,chr4:186631759-186632198,chr4:186632388-186632788,chr4:186658842-186659339,chr4:186694593-186695047	13
SOX5	chr12:24714995-24715426,chr12:24715946-24716346	15
SP100	chr2:231282960-231283360,chr2:231287430-231287830,chr2:231288420-231288820,chr2:231312060-231312460,chr2:231328370-231328770,chr2:231345040-231345440	15
SPARC	chr5:151098087-151098487,chr5:151119860-151120260,chr5:151120279-151120844,chr5:151124584-151124984	8
SPC24	chr19:11253867-11254291,chr19:11266212-11266623	1
SPDYA	chr2:28976059-28976505,chr2:29020717-29021117,chr2:29033552-29034009,chr2:29038567-29038967	15	BP00001:Carbohydrate metabolism; BP00179:Apoptosis; BP00285:Cell structure and motility; hsa04910:Insulin signaling pathway
SPG7	chr16:89571918-89572339	6
SPHK1	chr17:74368527-74368927,chr17:74379152-74379572,chr17:74444190-74444670	4,8	BP00102:Signal transduction; BP00224:Cell proliferation and differentiation; hsa04020:Calcium signaling pathway; hsa04666:Fc gamma R-mediated phagocytosis
SPIN1	chr9:91073764-91074164,chr9:91075544-91075944,chr9:91091344-91091744,chr9:91091904-91092304,chr9:91149919-91150348,chr9:91152279-91152679	1,4
SPOCD1	chr1:32254507-32254907,chr1:32264017-32264437	4
SPOCK1	chr5:136478547-136478947,chr5:136481890-136482630	8
SPOCK2	chr10:73736783-73737183,chr10:73766384-73766784,chr10:73848667-73849067	14,15
SPRY1	chr4:124319928-124320328	15	BP00102:Signal transduction; BP00103:Cell surface receptor mediated signal transduction
SPRY4	chr5:141703695-141704095,chr5:141706976-141707376,chr5:142024674-142025074	4
SPTAN1	chr9:131313137-131313585	8	hsa04530:Tight junction
SPTBN1	chr2:54502472-54502872,chr2:54557191-54557770,chr2:54563693-54564093	4,8	BP00285:Cell structure and motility; BP00286:Cell structure
SQRDL	chr15:45987317-45987717,chr15:45996567-45997129	14
SREK1	chr5:65349485-65349885	4
SRFBP1	chr5:121400687-121401146,chr5:121409646-121410046	4
SRGAP1	chr12:64575030-64575517	8	BP00102:Signal transduction; BP00111:Intracellular signaling cascade; BP00124:Cell adhesion; BP00224:Cell proliferation and differentiation; BP00285:Cell structure and motility; hsa04360:Axon guidance
SRPX	chrX:38003922-38004322,chrX:38040522-38040942,chrX:38069922-38070322,chrX:38079240-38079702	15
SSBP2	chr5:80697034-80697434,chr5:80787163-80787563,chr5:81045094-81045533,chr5:81046614-81047055	13
SSC5D	chr19:55999586-55999986,chr19:56030909-56031309	8
SSH1	chr12:109219369-109219769	8	BP00063:Protein modification; BP00064:Protein phosphorylation; BP00102:Signal transduction; BP00111:Intracellular signaling cascade; BP00119:Other intracellular signaling cascade; BP00193:Developmental processes; BP00285:Cell structure and motility; hsa04810:Regulation of actin cytoskeleton
SSR3	chr3:156253019-156253979,chr3:156254324-156254880,chr3:156256370-156256770,chr3:156271809-156272209,chr3:156272320-156272730	4	BP00136:Other intracellular protein traffic
SSX2IP	chr1:85108076-85108476,chr1:85131628-85132028,chr1:85155851-85156251	10	BP00124:Cell adhesion
ST3GAL4	chr11:126292293-126292693,chr11:126301533-126301933,chr11:126333103-126333523,chr11:126515090-126515490	1
ST3GAL6	chr3:98509309-98509709,chr3:98510299-98510699,chr3:98511529-98511929	8	BP00063:Protein modification
ST8SIA1	chr12:22428871-22429271,chr12:22435203-22435603,chr12:22487314-22488108	10,11	BP00060:Protein metabolism and modification
STARD8	chrX:67919917-67920317	1
STAT5A	chr17:40461095-40461495,chr17:40463335-40463898,chr17:40531218-40531618,chr17:40539278-40539678	13,15	BP00102:Signal transduction; BP00111:Intracellular signaling cascade; BP00148:Immunity and defense; BP00179:Apoptosis; BP00193:Developmental processes; BP00248:Mesoderm development; hsa04630:Jak-STAT signaling pathway; hsa05221:Acute myeloid leukemia
STC2	chr5:172719277-172719677,chr5:172742591-172743061,chr5:172744381-172744781,chr5:172746284-172746684,chr5:172884106-172884506,chr5:172885876-172886276,chr5:172901896-172902296,chr5:173023004-173023404	14	BP00102:Signal transduction; BP00103:Cell surface receptor mediated signal transduction
STEAP1	chr7:89783618-89784018	14
STEAP1B	chr7:22600980-22601380,chr7:22603180-22603762,chr7:22604350-22604750,chr7:22629230-22629630	8
STEAP3	chr2:119981270-119981710,chr2:119989452-119989852	4
STK10	chr5:171538091-171538769,chr5:171614120-171614520	8	BP00063:Protein modification; BP00064:Protein phosphorylation
STK24	chr13:99064088-99064488,chr13:99092084-99092484,chr13:99094634-99095034,chr13:99096114-99096514,chr13:99096594-99096994,chr13:99097036-99097504,chr13:99136344-99136834,chr13:99148354-99148754,chr13:99166404-99166804,chr13:99176216-99176616,chr13:99224684-99225094	15	BP00289:Other metabolism
STK38L	chr12:27330440-27330840,chr12:27331990-27332390,chr12:27332540-27332959,chr12:27338146-27338836,chr12:27347466-27347866,chr12:27398083-27398483,chr12:27398967-27399367,chr12:27399647-27400047,chr12:27431133-27431533,chr12:27446193-27446593	8	BP00063:Protein modification; BP00064:Protein phosphorylation; BP00102:Signal transduction; BP00111:Intracellular signaling cascade; BP00119:Other intracellular signaling cascade; BP00207:Cell cycle control; BP00285:Cell structure and motility; BP00286:Cell structure
STK40	chr1:36803719-36804119,chr1:36816635-36817035,chr1:36817069-36817469	8	BP00063:Protein modification; BP00064:Protein phosphorylation
STMN1	chr1:26221749-26222149,chr1:26231691-26232091	1	hsa04010:MAPK signaling pathway
STOM	chr9:124125225-124125625,chr9:124131905-124132323	15	BP00285:Cell structure and motility
STOML1	chr15:74274613-74275013,chr15:74275730-74276130	1
STRA6	chr15:74492570-74492970	10
STX1A	chr7:73132462-73132862	8
STXBP5	chr6:147478149-147478549,chr6:147528419-147528819,chr6:147539513-147540093,chr6:147543363-147543763,chr6:147544903-147545303,chr6:147577743-147578143,chr6:147589293-147589693,chr6:147619813-147620213,chr6:147620423-147620823,chr6:147622433-147622833,chr6:147663243-147663643,chr6:147687503-147687903,chr6:147722933-147723333	15
SULF2	chr20:46132414-46132814	13	BP00101:Sulfur metabolism
SUSD1	chr9:114812319-114812719,chr9:114821519-114821919	9
SUV420H1	chr11:67929036-67929436	8
SYDE1	chr19:15225367-15225767	4
SYNE1	chr6:152447892-152448292,chr6:152518062-152518462,chr6:152557992-152558392,chr6:152574402-152574802,chr6:152593094-152593572,chr6:152606184-152606584,chr6:152702172-152702599,chr6:152702781-152703181	4,8
SYNJ2	chr6:158312443-158312843,chr6:158383789-158384189,chr6:158402735-158403137,chr6:158447205-158447927,chr6:158448105-158448505,chr6:158452310-158452710,chr6:158452838-158453238,chr6:158461800-158462200,chr6:158477595-158478157,chr6:158478215-158478687,chr6:158481317-158481755,chr6:158481927-158482467	8	hsa04070:Phosphatidylinositol signaling system
SYNPO	chr5:150021315-150021715,chr5:150021490-150021890,chr5:150021760-150022160,chr5:150022155-150022640	8,9	BP00193:Developmental processes; BP00285:Cell structure and motility; BP00286:Cell structure; BP00287:Cell motility
SYT5	chr19:55684041-55684528,chr19:55690438-55691688	8
SYT7	chr11:61366924-61367324	10
TACC2	chr10:123872070-123872470	4
TACC3	chr4:1723076-1723476,chr4:1747816-1748216	1
TACR2	chr10:71087293-71087693	9	BP00285:Cell structure and motility; BP00287:Cell motility
TAF9B	chrX:77388644-77389044,chrX:77392254-77392654	14
TANC2	chr17:61044054-61044534,chr17:61045694-61046114	13
TARS	chr5:33032774-33033174	9
TAZ	chrX:153640156-153640652	4
TBC1D10A	chr22:30683243-30683643,chr22:30683967-30684748,chr22:30685253-30685963,chr22:30686101-30687227,chr22:30697808-30698688,chr22:30699748-30700148,chr22:30701668-30702068,chr22:30720347-30720747,chr22:30721007-30721503	15
TBC1D16	chr17:77975318-77975718	15
TBC1D2	chr9:100977232-100977632,chr9:100985362-100985805,chr9:101011173-101011621,chr9:101013941-101014341,chr9:101017401-101017875	8
TBL1X	chrX:9498820-9499220	14
TBX15	chr1:119445369-119445769,chr1:119492049-119492451,chr1:119516261-119516661,chr1:119530758-119531158,chr1:119531451-119531851,chr1:119644072-119644472	13	BP00193:Developmental processes
TBX2	chr17:59488023-59488491	14	BP00193:Developmental processes
TCEA1	chr8:54851523-54851976,chr8:54932164-54932619,chr8:54932949-54933349	10
TCEA3	chr1:23721248-23722047,chr1:23805563-23806048	15
TCF19	chr6:31126174-31126654	1
TCF4	chr18:52613368-52613768,chr18:53815426-53816216,chr18:53835526-53836196,chr18:54070174-54070574	8
TCF7L1	chr2:85389858-85390258,chr2:85476169-85476569,chr2:85491519-85491919,chr2:85525859-85526259	1	hsa04520:Adherens junction
TCTN2	chr12:124144783-124145183	9
TCTN3	chr10:97421518-97421918	15
TDP1	chr14:90420743-90421525,chr14:90422073-90422532,chr14:90422652-90423118	1,4
TEF	chr22:41760934-41761334,chr22:41776979-41777532	9
TENC1	chr12:53444614-53445134	15	BP00102:Signal transduction; BP00285:Cell structure and motility
TES	chr7:115850918-115851318,chr7:115852303-115852703,chr7:115862589-115862989,chr7:115900068-115900468,chr7:115900959-115901523,chr7:116095060-116095460	8	BP00193:Developmental processes; BP00264:Tumor suppressor; BP00285:Cell structure and motility; BP00286:Cell structure; BP00287:Cell motility
TET3	chr2:74229411-74229811,chr2:74230681-74231081	10
TFDP1	chr13:114185831-114186231,chr13:114186621-114187021,chr13:114238606-114239061,chr13:114265576-114265976	1,6	BP00031:Nucleoside, nucleotide and nucleic acid metabolism; BP00203:Cell cycle; hsa04110:Cell cycle
TFEB	chr6:41649777-41650177,chr6:41701971-41702371	8
TFG	chr3:100472324-100472724,chr3:100474024-100474544	9
TG	chr8:133870367-133870767,chr8:133888045-133888445,chr8:133888859-133889259	13	BP00102:Signal transduction
TGFB1I1	chr16:31484006-31484409	8	BP00285:Cell structure and motility; BP00287:Cell motility
TGFB3	chr14:76289552-76289952,chr14:76335031-76335431,chr14:76342930-76343330,chr14:76343530-76343930,chr14:76350530-76350930	10	BP00102:Signal transduction; BP00193:Developmental processes; hsa04060:Cytokine-cytokine receptor interaction
TGFBR3	chr1:92184566-92184966,chr1:92207637-92208037,chr1:92246816-92247216,chr1:92260937-92261337,chr1:92270237-92270637,chr1:92287487-92287887,chr1:92292876-92293276,chr1:92296256-92296656,chr1:92311396-92311796,chr1:92351045-92351445	13	BP00102:Signal transduction; BP00103:Cell surface receptor mediated signal transduction; BP00107:Cytokine and chemokine mediated signaling pathway
TGIF1	chr18:3593625-3594753,chr18:3602755-3603155,chr18:3603392-3604155,chr18:3604485-3604905,chr18:3652745-3653145	9
TH1L	chr20:57565966-57566566,chr20:57568376-57568840	4
THADA	chr2:43495406-43495806,chr2:43496056-43496456,chr2:43500506-43500906,chr2:43551415-43552485,chr2:43682803-43683203,chr2:43713612-43714046	15
THBS2	chr6:169356548-169356948,chr6:169470418-169470888,chr6:169557514-169557914,chr6:169563157-169563664,chr6:169563734-169564134,chr6:169590097-169590497,chr6:169605418-169606168,chr6:169648488-169648888	10	BP00193:Developmental processes; hsa04510:Focal adhesion; hsa04512:ECM-receptor interaction
THOC6	chr16:3070722-3071122,chr16:3071372-3071772	8
THRA	chr17:38219458-38219974,chr17:38231214-38231614	13,15	BP00102:Signal transduction; BP00193:Developmental processes
THSD1	chr13:52922150-52922552	8
TIMM8A	chrX:100603602-100604036	1
TIMP2	chr17:76879886-76880312,chr17:76930014-76930470,chr17:76968606-76969006	1,4
TIMP4	chr3:12189781-12190181,chr3:12190481-12190881,chr3:12196941-12197521,chr3:12329828-12330228	15
TIPARP	chr3:156393005-156393405,chr3:156435068-156435468,chr3:156436688-156437128,chr3:156440888-156441288,chr3:156445178-156445578,chr3:156793897-156794297,chr3:156794917-156795317,chr3:156795577-156795977,chr3:156799427-156799868,chr3:156800387-156800787,chr3:156805787-156806187,chr3:156846230-156846630	13,15
TJP2	chr9:71788519-71788919	1
TK1	chr17:76167578-76167978,chr17:76171706-76172106,chr17:76182822-76183222	3
TLE6	chr19:2983007-2983523,chr19:2983897-2984297	13	BP00193:Developmental processes
TM4SF1	chr3:149085299-149085795,chr3:149086009-149086435,chr3:149091295-149091695,chr3:149184616-149185016	4
TM6SF1	chr15:83874761-83875161	9
TMC7	chr16:18995101-18995584	8
TMED3	chr15:79604068-79604468	9
TMEM100	chr17:53809282-53809697	12
TMEM106C	chr12:48357209-48357609	8
TMEM119	chr12:108991566-108992117,chr12:109014244-109014644	15
TMEM135	chr11:87038201-87038601	13
TMEM143	chr19:48832427-48833088,chr19:48837077-48837477	4
TMEM150C	chr4:83522295-83522695,chr4:83717824-83718224,chr4:83718694-83719094	15
TMEM164	chrX:109246187-109246614	13
TMEM173	chr5:138861632-138862321	4
TMEM18	chr2:933266-933666,chr2:933906-934306	1
TMEM184A	chr7:1701960-1702480,chr7:1704410-1704810,chr7:1709623-1710023	8
TMEM200A	chr6:130686669-130687297	4
TMEM214	chr2:27265205-27265605	4
TMEM237	chr2:202508578-202509052,chr2:202517261-202517661	9
TMEM44	chr3:194353560-194353960,chr3:194354141-194354610	4
TMEM63A	chr1:226001227-226001676,chr1:226033251-226033731	15
TMEM64	chr8:91620565-91620965	15
TMEM92	chr17:48295327-48295727,chr17:48296617-48297017,chr17:48347785-48348303,chr17:48350975-48351375,chr17:48351565-48351965,chr17:48352205-48352605,chr17:48352665-48353065,chr17:48366835-48367235,chr17:48382337-48382737	10
TMTC1	chr12:29878717-29879117,chr12:29935540-29936320,chr12:29936681-29937120	13	BP00102:Signal transduction
TNC	chr9:117779066-117780276,chr9:117780303-117780703,chr9:117780903-117781303,chr9:117820946-117821346,chr9:117878226-117878753	15	BP00102:Signal transduction; BP00275:Extracellular matrix protein-mediated signaling
TNFAIP2	chr14:103604470-103604870	8	BP00193:Developmental processes
TNFRSF19	chr13:24153091-24153643,chr13:24185163-24185563,chr13:24185873-24186273,chr13:24190173-24190573,chr13:24252049-24252449,chr13:24274482-24274882,chr13:24279822-24280222	14	BP00102:Signal transduction; BP00103:Cell surface receptor mediated signal transduction; BP00107:Cytokine and chemokine mediated signaling pathway; BP00111:Intracellular signaling cascade; BP00115:NF-kappaB cascade; BP00122:Ligand-mediated signaling; BP00155:Macrophage-mediated immunity; BP00193:Developmental processes; BP00274:Cell communication; BP00288:Granulocyte-mediated immunity
TNFRSF21	chr6:47193184-47193584,chr6:47277406-47277806	15	BP00102:Signal transduction; BP00103:Cell surface receptor mediated signal transduction; BP00110:Other receptor mediated signaling pathway; BP00179:Apoptosis
TNFSF10	chr3:172230112-172230512,chr3:172234582-172234982	10	BP00102:Signal transduction; BP00122:Ligand-mediated signaling; BP00274:Cell communication; hsa04060:Cytokine-cytokine receptor interaction
TNFSF9	chr19:6516432-6517212,chr19:6528249-6528649	8
TNK2	chr3:195622790-195623190	4	BP00063:Protein modification
TNNT3	chr11:1889776-1890229,chr11:1891512-1891912,chr11:1938806-1939206	11
TNS1	chr2:217970245-217970645,chr2:218660371-218660884,chr2:218660914-218661314,chr2:218661914-218662314,chr2:218776676-218777076,chr2:218799721-218800121,chr2:218874801-218875201	8	BP00063:Protein modification; BP00064:Protein phosphorylation; BP00102:Signal transduction; BP00124:Cell adhesion; BP00207:Cell cycle control; BP00224:Cell proliferation and differentiation; BP00264:Tumor suppressor
TNS3	chr7:47310119-47310519,chr7:47322389-47322789,chr7:47399949-47400349,chr7:47474259-47474659,chr7:47498769-47499169,chr7:47611286-47611686,chr7:47810810-47811210,chr7:47823355-47823755	10	BP00102:Signal transduction; BP00124:Cell adhesion; BP00281:Oncogenesis
TNS4	chr17:38696832-38697232	15	BP00102:Signal transduction
TOMM20	chr1:235280908-235281308,chr1:235281558-235281958	6
TOMM7	chr7:22850587-22850987,chr7:22894319-22894719,chr7:22895031-22895431	9
TOP2A	chr17:38573849-38574679	3	BP00203:Cell cycle
TPCN1	chr12:113660829-113661229,chr12:113729655-113730055	10
TPD52L2	chr20:62496975-62497388	4
TPM1	chr15:63143167-63143567	4	BP00285:Cell structure and motility; BP00286:Cell structure; BP00287:Cell motility; hsa05410:Hypertrophic cardiomyopathy (HCM); hsa05414:Dilated cardiomyopathy
TPM3	chr1:154154714-154155174	4	BP00285:Cell structure and motility; BP00286:Cell structure; BP00287:Cell motility; hsa05200:Pathways in cancer; hsa05410:Hypertrophic cardiomyopathy (HCM); hsa05414:Dilated cardiomyopathy
TPP1	chr11:6639450-6639850	4	hsa04142:Lysosome
TPST1	chr7:65703676-65704076,chr7:65705294-65705694,chr7:65744756-65745156,chr7:65773129-65773529,chr7:65791339-65791739	13
TPST2	chr22:26920695-26921095,chr22:26948688-26949188	8	BP00063:Protein modification
TRAF3IP2	chr6:111875741-111876141,chr6:111880929-111881329,chr6:111897439-111897839,chr6:111912859-111913259,chr6:111946848-111947248,chr6:111949428-111949963,chr6:111968146-111968546,chr6:111978779-111979179,chr6:111978816-111979216,chr6:111984916-111985519,chr6:111985629-111986029,chr6:111987699-111988139,chr6:111989709-111990109,chr6:112021266-112021819,chr6:112031289-112031689,chr6:112034029-112034429…	13,15
TRAK1	chr3:42132766-42133166	8	BP00193:Developmental processes
TRAPPC3	chr1:36580695-36581195	4
TRIB3	chr20:361481-362701,chr20:379979-380408,chr20:381281-381681	10	BP00102:Signal transduction
TRIM59	chr3:160151881-160152461,chr3:160152831-160153231,chr3:160153411-160153811,chr3:160167651-160168162	1
TRIO	chr5:14185589-14186158,chr5:14186881-14187281,chr5:14265601-14266001,chr5:14498381-14498781	1
TRIOBP	chr22:38172506-38172906,chr22:38173086-38173550	4	BP00285:Cell structure and motility; BP00286:Cell structure
TRNP1	chr1:27326117-27326517	14
TROAP	chr12:49715840-49716240,chr12:49716899-49717357	3
TRPC4	chr13:38443592-38443992	1
TRPV2	chr17:16318755-16319155	4
TSC22D1	chr13:45042297-45042717,chr13:45043027-45043427,chr13:45080437-45080837,chr13:45114957-45115357,chr13:45127862-45128262,chr13:45288319-45288719,chr13:45332845-45333245	4,8
TSC22D2	chr3:149865356-149865756,chr3:150088703-150089103,chr3:150090433-150090833,chr3:150179772-150180291,chr3:150183901-150184301	1,4
TSC22D3	chrX:106916307-106916707,chrX:106916957-106917357,chrX:106918067-106918897,chrX:106919081-106919547,chrX:106919917-106920515,chrX:106943712-106944112,chrX:106955696-106956159,chrX:106956606-106957006,chrX:106958906-106959326,chrX:106959416-106959816,chrX:106959997-106960436,chrX:106985528-106985928,chrX:107018905-107019348,chrX:107019297-107019697	13,15
TSHZ1	chr18:72922999-72923399	14	BP00193:Developmental processes
TSKU	chr11:76481717-76482218,chr11:76495047-76495447,chr11:76496508-76496908	13	BP00102:Signal transduction; BP00103:Cell surface receptor mediated signal transduction; BP00193:Developmental processes
TSPAN4	chr11:844808-845208,chr11:868358-868758	1
TSPYL4	chr6:116573042-116573442	1
TSTA3	chr8:144718484-144718977	4
TTC39C	chr18:21463331-21463731,chr18:21464021-21464421,chr18:21464511-21464911,chr18:21592430-21592830,chr18:21595126-21595626,chr18:21634111-21634511	13,15
TTC7A	chr2:47212210-47212709,chr2:47212721-47213121,chr2:47213590-47214081,chr2:47260990-47261556,chr2:47271990-47272390	8	BP00063:Protein modification; BP00102:Signal transduction; BP00274:Cell communication
TUBA1B	chr12:49523482-49523882,chr12:49524432-49524832	4	BP00203:Cell cycle; BP00206:Chromosome segregation; BP00282:Mitosis; BP00285:Cell structure and motility; BP00286:Cell structure; BP00287:Cell motility; hsa05130:Pathogenic Escherichia coli infection
TUBB6	chr18:12282405-12282805,chr18:12287881-12288281,chr18:12327785-12328273	4	BP00203:Cell cycle; BP00206:Chromosome segregation; BP00282:Mitosis; BP00285:Cell structure and motility; BP00286:Cell structure; BP00287:Cell motility; hsa05130:Pathogenic Escherichia coli infection
TUBE1	chr6:112408150-112408550	10	BP00286:Cell structure
TXNIP	chr1:145442875-145443355	13
TXNRD1	chr12:104571878-104572278	13
TYMS	chr18:658023-658432,chr18:686519-686919	1	hsa00240:Pyrimidine metabolism
UACA	chr15:70909224-70909624,chr15:70938518-70938944,chr15:70939314-70939714,chr15:71054749-71055391,chr15:71094742-71095142	10
UBASH3B	chr11:122614978-122615378,chr11:122634968-122635428	1
UBC	chr12:125389440-125389840	13	hsa03320:PPAR signaling pathway
UBE2C	chr20:44446250-44446687	3	BP00203:Cell cycle; BP00207:Cell cycle control
UBXN11	chr1:26608099-26608509,chr1:26608949-26609489,chr1:26611187-26611727,chr1:26612089-26612529,chr1:26633209-26633609	8
UGDH	chr4:39466668-39467068,chr4:39498442-39499059,chr4:39512192-39512592,chr4:39528289-39528689	4	BP00009:Other polysaccharide metabolism
UHRF1	chr19:4910934-4911432,chr19:4911680-4912362	4	BP00203:Cell cycle
UHRF1BP1	chr6:34760466-34760866	11
UHRF2	chr9:6383565-6384031,chr9:6436216-6436616,chr9:6511663-6512063,chr9:6530253-6530653,chr9:6552758-6553158,chr9:6565326-6565726,chr9:6566336-6566736,chr9:6566851-6567251	8	BP00224:Cell proliferation and differentiation
ULK1	chr12:132345319-132345719	11	BP00060:Protein metabolism and modification
UNC5B	chr10:72972850-72973457,chr10:72973637-72974089,chr10:72976649-72977049,chr10:72977490-72977929,chr10:73001800-73002200,chr10:73067149-73067549,chr10:73070507-73071250,chr10:73073129-73073529	10	BP00102:Signal transduction; BP00193:Developmental processes
UPF3A	chr13:115069807-115070207	4
USP1	chr1:62902546-62903000,chr1:62915306-62915706,chr1:62923646-62924046	1,4
USP35	chr11:77921196-77921676,chr11:77921746-77922146	9
USP53	chr4:120132465-120132979,chr4:120142819-120143219,chr4:120147289-120147689,chr4:120152759-120153159,chr4:120168389-120168789	15
VASP	chr19:46012606-46013006	4	hsa04510:Focal adhesion
VCAM1	chr1:101088038-101088438,chr1:101185158-101185569,chr1:101186926-101187399,chr1:101206488-101206888	10	BP00102:Signal transduction; BP00124:Cell adhesion; BP00274:Cell communication
VDR	chr12:48233090-48233490	9
VEGFA	chr6:43756065-43756465,chr6:43878195-43878595,chr6:43885165-43885565,chr6:43894181-43894581,chr6:43894671-43895071	10	BP00102:Signal transduction; BP00122:Ligand-mediated signaling; BP00193:Developmental processes; BP00248:Mesoderm development; BP00274:Cell communication; BP00281:Oncogenesis; hsa04060:Cytokine-cytokine receptor interaction; hsa04510:Focal adhesion
VEGFC	chr4:177327709-177328109,chr4:177711192-177711868,chr4:177712668-177713562,chr4:177713952-177714352,chr4:177823919-177824319	4	BP00203:Cell cycle; BP00207:Cell cycle control; hsa04510:Focal adhesion; hsa05200:Pathways in cancer; hsa05211:Renal cell carcinoma; hsa05219:Bladder cancer
VIM	chr10:17257194-17257594,chr10:17274065-17274645,chr10:17278085-17278545,chr10:17390644-17391044	8	BP00193:Developmental processes; BP00285:Cell structure and motility; BP00286:Cell structure
VIT	chr2:36923745-36924145,chr2:37121160-37121560	15
VMO1	chr17:4689382-4689844,chr17:4693028-4693428	14
WARS	chr14:100797431-100797831,chr14:100798541-100798941,chr14:100841533-100842313	10	BP00074:Amino acid activation; hsa00970:Aminoacyl-tRNA biosynthesis
WASF3	chr13:27113111-27113540,chr13:27132251-27132756,chr13:27135281-27135901,chr13:27136141-27136541,chr13:27158791-27159191,chr13:27159401-27159801,chr13:27179006-27179406,chr13:27202711-27203111,chr13:27213440-27213840,chr13:27267020-27267429,chr13:27269169-27269569,chr13:27269630-27270030,chr13:27270200-27270600,chr13:27272640-27273040	13
WDFY2	chr13:52033672-52034072,chr13:52162090-52162490,chr13:52218207-52218607	9
WDR1	chr4:10109315-10109715	4	BP00285:Cell structure and motility; BP00287:Cell motility
WDR62	chr19:36545336-36545736	1
WEE1	chr11:9595013-9595420,chr11:9612076-9612550	6	BP00203:Cell cycle; BP00207:Cell cycle control; hsa04110:Cell cycle
WHSC1	chr4:1874566-1874972	4	BP00273:Chromatin packaging and remodeling
WHSC2	chr4:1985981-1986622	4
WISP1	chr8:134087100-134087500,chr8:134244095-134244495,chr8:134305661-134306061	15	BP00102:Signal transduction; BP00103:Cell surface receptor mediated signal transduction; BP00285:Cell structure and motility
WISP2	chr20:43335347-43335747	12
WISP3	chr6:112127060-112127460,chr6:112240077-112240477,chr6:112387970-112388370	11
WNT5B	chr12:1740296-1740696,chr12:1744706-1745106	6	hsa04310:Wnt signaling pathway; hsa05200:Pathways in cancer
WNT7B	chr22:46068659-46069059,chr22:46084309-46085109,chr22:46181357-46181757,chr22:46186157-46186557,chr22:46299399-46299799,chr22:46367263-46367663	1
WSB2	chr12:118499133-118499539,chr12:118499979-118500455	4
WWTR1	chr3:149257813-149258213,chr3:149293543-149294063,chr3:149339113-149339513,chr3:149375123-149375523	8	BP00102:Signal transduction
XAF1	chr17:6656261-6656661,chr17:6659142-6659570,chr17:6664965-6665365,chr17:6679292-6679704,chr17:6680004-6680404	10
XBP1	chr22:29188541-29188941,chr22:29189078-29189611,chr22:29195331-29195758	9
XPOT	chr12:64463703-64464103,chr12:64554317-64554717	10
XYLT1	chr16:17262970-17263370,chr16:17424835-17425235,chr16:17527366-17527766,chr16:17565325-17565725	6
XYLT2	chr17:48423961-48424471	4	BP00063:Protein modification; BP00067:Protein glycosylation
YAP1	chr11:102009921-102010350	9
YARS	chr1:33326237-33326637	10	BP00074:Amino acid activation; hsa00970:Aminoacyl-tRNA biosynthesis
YBX1	chr1:43160589-43160989	6	BP00031:Nucleoside, nucleotide and nucleic acid metabolism
YIPF5	chr5:143267895-143268295	9
YPEL2	chr17:57409924-57410489,chr17:57448739-57449168,chr17:57449829-57450229,chr17:57451259-57451659	13
YPEL4	chr11:57405695-57406108,chr11:57414329-57414738,chr11:57415919-57416368	4
YWHAH	chr22:32339975-32340388,chr22:32340565-32341238	4	BP00203:Cell cycle; hsa04110:Cell cycle
YWHAQ	chr2:9719005-9719405,chr2:9744465-9744865,chr2:9753773-9754173,chr2:9892786-9893222,chr2:9893256-9893775	4	BP00203:Cell cycle; hsa04110:Cell cycle; hsa05130:Pathogenic Escherichia coli infection
YWHAZ	chr8:101801134-101801534,chr8:101965562-101965962,chr8:102138881-102139281,chr8:102161691-102162091,chr8:102168077-102168477,chr8:102193092-102193492,chr8:102201302-102201702	8,9	BP00102:Signal transduction; hsa05130:Pathogenic Escherichia coli infection
ZBED3	chr5:76363539-76363939,chr5:76369549-76369949,chr5:76382459-76382859	15
ZBTB16	chr11:113907036-113907436,chr11:113929870-113931054	13	hsa05221:Acute myeloid leukemia
ZBTB22	chr6:33288151-33288551	8
ZBTB38	chr3:141031079-141031479,chr3:141124953-141125353,chr3:141129046-141129446	6	BP00031:Nucleoside, nucleotide and nucleic acid metabolism
ZC3H12D	chr6:149659730-149660130,chr6:149726020-149726420,chr6:149753180-149753580,chr6:149772021-149772427,chr6:149775071-149775471,chr6:149775601-149776001,chr6:149776231-149776631	14
ZCCHC11	chr1:52955132-52955532	14
ZCCHC24	chr10:81138825-81139225,chr10:81139585-81140267,chr10:81140475-81141123,chr10:81141375-81141907,chr10:81161465-81161885,chr10:81181997-81182397,chr10:81195151-81195551,chr10:81200341-81200787,chr10:81204435-81204835,chr10:81204911-81205337	15
ZDHHC9	chrX:128976432-128976832	15
ZEB1	chr10:31673235-31673635,chr10:31678225-31678625,chr10:32086420-32086820	15
ZFHX3	chr16:72853721-72854121,chr16:72858191-72858591,chr16:72863251-72863651,chr16:72892641-72893086,chr16:72912207-72912607,chr16:72992531-72992931,chr16:72999311-72999711,chr16:73023936-73024401,chr16:73053931-73054431,chr16:73059211-73059611,chr16:73089319-73089719,chr16:73089959-73090366	15
ZFHX4	chr8:77584987-77585462,chr8:77586211-77586611,chr8:77589467-77589867,chr8:77593822-77594321,chr8:77714702-77715102,chr8:77718272-77718672,chr8:77781951-77782351	6	BP00031:Nucleoside, nucleotide and nucleic acid metabolism
ZFP161	chr18:5294814-5295214	4
ZFP36	chr19:39898040-39899245	13	BP00102:Signal transduction; BP00111:Intracellular signaling cascade
ZFP36L1	chr14:69010792-69011228,chr14:69014773-69015342,chr14:69015584-69015984,chr14:69065214-69065614,chr14:69162170-69162570,chr14:69253013-69253700,chr14:69253828-69254228,chr14:69255125-69255525,chr14:69256133-69256533,chr14:69257743-69258465,chr14:69258955-69259355	13	BP00102:Signal transduction; BP00111:Intracellular signaling cascade
ZFP36L2	chr2:43449575-43450291,chr2:43450511-43450911,chr2:43451185-43451585,chr2:43451631-43452031,chr2:43452225-43452625,chr2:43496714-43497226,chr2:43682093-43682493	13	BP00102:Signal transduction; BP00111:Intracellular signaling cascade
ZFP91	chr11:58344944-58345686	4
ZNF22	chr10:45495689-45496206	15
ZNF354C	chr5:178509751-178510151,chr5:178592605-178593005,chr5:178663105-178663505,chr5:178677635-178678035	13
ZNF365	chr10:64319688-64320168,chr10:64323138-64323868,chr10:64323905-64324305,chr10:64324328-64325088,chr10:64337332-64337732,chr10:64341702-64342102,chr10:64342332-64342777	10,9
ZNF395	chr8:28239987-28240387,chr8:28240647-28241047,chr8:28241097-28241497,chr8:28241817-28242217,chr8:28270228-28270628	14
ZNF469	chr16:88337796-88338196,chr16:88508207-88508607,chr16:88508834-88509664	9
ZNF474	chr5:121462481-121462901,chr5:121478059-121478459,chr5:121488269-121488669	10
ZNF503	chr10:77154040-77154440,chr10:77154960-77155360,chr10:77156128-77156928,chr10:77156938-77157338,chr10:77159492-77160210,chr10:77160780-77161288,chr10:77846236-77846636,chr10:78156060-78156460	13
ZNF598	chr16:2058038-2058458	4	BP00063:Protein modification
ZNF643	chr1:40916153-40916553	10
ZNF697	chr1:120148654-120149054,chr1:120154294-120154694,chr1:120156554-120156954	15
[truncated: 4 more rows]

## Sheet: by GO term
Gene Lists Associated with Gene Ontology Analysis, Related to Figure 1
[truncated: 114 more rows]
