# Supplementary material for: ATF4 licenses C/EBPβ activity in human mesenchymal stem cells primed for adipogenesis
Source: eLife. 2015 Jun 25;4:e06821. doi: 10.7554/eLife.06821 (PMC4501333; doi:10.7554/eLife.06821)
Supplement: Supplementary file 2. — Oligonucleotides Used in the Study. Spreadsheets list PCR primers used to subclone candidate enhancers for luciferase assays, to examine first-strand cDNA for mRNA expression, and to interrogate ChIP DNA for TF occupancy. DOI: http://dx.doi.org/10.7554/eLife.06821.017 [file elife06821s002.xlsx]

## Sheet: Luciferase reporter oligos
hg19 genomic coordinates for each reporter are as follows: ASNS, chr7:97501555-97502014; MTHFD2, chr2:74426247-74426355; SLC7A5, chr16:87887210-87887550; Intergenic hybrid, chr1:204476231-204476350; control C/EBPb (LAMb1), chr7:107598937-107599756; ASTN2, chr9:119212591-119213520; HSD11b1, chr1:209893618-209894063; PPARg2, chr3:12391004-12392991.
ASNS-SE	GCATCTCGAGCCAAGTTCAGAAGCCTCCCTAATTG
ASNS-AS	AAATGGATCCACCGCATCCTCCACCCCTTCCTT
SLC7A5-SE	AATTGTCGACCTAGCAGACGTGACAGCCGCAGAC
SLC7A5-AS	ATATGGATCCAGGTCCTGGCTTGCCAGTCCCA
MTHFD2-SE	ATATCTCGAGTCGTCTGGGGGAGAACAGGC
MTHFD2-AS	CACAGGATCCCTCCGCGATTTCATCAGCTGCA
Intergenic SE	ATGCCTCGAGTCCCGTAGACAACAGCTTGTTCTGCCGTTTC
Intergenic AS	TCTGGGATCCTTTACGCACGAATCACGAACTTTC
control cebpb SE	AAATCTCGAGACTGGGGAGTGCTTGAACTGCC
control cebpb AS	ATCCGGATCCCAAATATCTTCGATAGGGCGAATGG
ASTN2-SE	ACTTGTCGACAGGGAGATGCTCACATACCAG
ASTN2-AS	GACTGGATCCGCCTACTGACTCCAATGTAGAG
HSD11b1-SE	AATTCTCGAGTGATGGGGTGCAACGTGAAGA
HSD11b1-AS	AAAGGATCCAATTGAGGATCATGAGT
PPARG2-SE	GTAACTCGAGTACTGAGCTGCTATGTGGCAG
PPARG2-AS	TTCAGGATCCCACCCATGAGTCAAGACATCAG

## Sheet: mRNA qPCR primers
	forward	reverse
ACACB	CAGGAGATTCGAGGACTTCACC	GATGGGCTCTTCTCTGAGGCT
ADIPOQ	GGCATGACCAGGAAACCAC	TTCACCGATGTCTCCCTTAGG
AKR1C1	TTGCCAGCCAGGCTAGTGAC	GCGGAAGCCAGCTTCAATTG
ALOX15b	CTGAATGGTCTCAACCCTGTC	GGGAGCCCTTCTCTAGCTCA
AOC3	AGAGCCGCTGCCCCAAAACA	TGGGTCACAGCCAGCTGGTAC
ASNS	GGAAGACAGCCCCGATTTACT	AGCACGAACTGTTGTAATGTCA
ATF4	ATGACCGAAATGAGCTTCCTG	GCTGGAGAACCCATGAGGT
CEBPA	TGGACAAGAACAGCAACGAGTA	ATTGTCACTGGTCAGCTCCAG
CIDEC	AAGTCCCTTAGCCTTCTCTACC	CCTTCCTCACGCTTCGATCC
COX6C	CCAAAACCTCGGATGCGTG	AAATCTGCGTATGCCTTCTTTCT
FABP4	AGCACCATAACCTTAGATGGGG	CGTGGAAGTGACGCCTTTCA
FKBP5	CTCCCTAAAATTCCCTCGAATGC	CCCTCTCCTTTCCGTTTGGTT
GARS	AAAGCCCGCAAGAGGGTTC	CTTCCATTTTTGCTCGGTCTACA
GPD1	AGGAAGACATTGGAGGCAAAAA	GCAGCCTGGACCACATCTG
HSD11b1	AGCAGGAAAGCTCATGGGAG	CCACGTAACTGAGGAAGTTGAC
LPL	TCATTCCCGGAGTAGCAGAGT	GGCCACAAGTTTTGGCACC
LRRC40	GATCTCCGCGCTGGTTTCAA	GCGGCACTTCACTGAGGTT
MTHFD2	GATCCTGGTTGGCGAGAATCC	TCTGGAAGAGGCAACTGAACA
PDK4	GGAGCATTTCTCGCGCTACA	ACAGGCAATTCTTGTCGCAAA
PHGDH	CTGCGGAAAGTGCTCATCAGT	TGGCAGAGCGAACAATAAGGC
PLIN2	CTAGAGCCGCAAATTGCAGTT	AACAATCTGAGTTGATGGCTGAT
PPARG2	ATGGGTGAAACTCTGGGAGATT	ACCATGGTCATTTCTTGTGATATG
PPIE	GCTTTTTGGACGTACAATTCGTG	TCTTCAAGCGTCTTCCCAGAA
RAD17	AAAGCCCGAGGATATGCTCAT	CCAGGCAATTTTCCCGATACTT
RPLP0	CAGATTGGCTACCCAACTGTT	GGGAAGGTGTAATCCGTCTCC
SLC7A5	CCGTGAACTGCTACAGCGT	CTTCCCGATCTGGACGAAGC
TFCP2	GTGTTCCATGACAGAAGGCTT	TTATACCCACAGACATCGGGAT
TRIB3	TACCTGCAAGGTGTACCCCG	AAGGCGTAGAGGAGCTGGGT
ZBTB16	GAGCAGCACAGGAAGCTGCA	GACAAAGGCTTTGGCACCCG

## Sheet: ChIP qPCR primers
	forward	reverse
ASNS	AGGGATGTGGACAGCTTGAC	GCAGGCATGATGAAACTTCC
APOL6	CCTGGCCCTTAGAAAGCAGA	tagacaactcacccagcacc
CHAC1	GAAACCTCCCCTGCCGTT	CTGCTTCTCACTTAACCGCG
DDIT4	CCACTGTTAGCCTCTGAGCA	CTCTGGAAAAGCCAGGGAGT
MTHFD2	GTCGTCTGGGGGAGAACAG	CTCCGCGATTTCATCAGC
PHGDH	CGTCTGATGCAAGACTGCTC	GGGAGGAGGCTAAATCTGGA
PSAT1	AATCTCGCGCGCTCCTTG	CATTGGTCGCGCTTCTGAG
SENS2	ACTCTTAGGGCTGTCACTGC	GGAGTTGTAGTCCGCCTCG
SLC7A5	GGGAGCACGACCATAAAAGA	CATGAATGAGCGAGTGATGC
TRIB3	ATTAGCTCCGGTTTGCATCA	CCACTTCCGCTGCGAGTCTC
WARS	ACCCTCTTGAGAATCGAGCC	GGAAGAGGGTGGGGAGGTTA
intergenic	AACAGCTTGTTCTGCCGTTT	TTTACGCACGAATCACGAAC
INS	GCCCACCCTCTGATGTATCT	AAAGTGACCAGCTCCCTGTG
HSD11B1	tcccatgatgaccatatcca	acaagctgatatgccgaagc
ASTN2	CACCATGCTCTGCTCTCACT	GGGGAAGTTTGGACATCTGA
PPARg	AGCTTTGCTGGCTAGAGGGG	TTTCGCAGAACTGAGGTTGA
PPARg2	GGCTTAATGGCACAGTTGCT	CCTGTCAATCATGGTGCAAG
GR-1	CTGCCAGCATTCCAGAGAGT	ACGGTAGTCAAGCCTGCATT
GR-2	CAGTGTTTGACGATGCCAGT	CAGCCAATTCCTGCTTCAGT
GR-3	TCCCTTTCACCAGCCTCTAA	GCCTTGACTGTTGGCAACTC
GR-4	CTGCCCAAAACCTCAGAAAT	AGAATGTCCTCCTGGGGTTG
GR-5	TGCAAAACATCACTTAAACTGGA	CCACATTCAGAACAGGGTGT
GR-6	CTGGGTGTGAGGCCCATC	CCCAAGTCAGACACATCCTG
GR-7	AGCTTTGCTGGCTAGAGGGG	TTTCGCAGAACTGAGGTTGA
