# Supplementary figures and images for: ATF4 licenses C/EBPβ activity in human mesenchymal stem cells primed for adipogenesis
Source: eLife journal article supplement (doi:10.7554/elife.06821), 2015-06-25

Cohen et al., Figure 4-figure supplement 1

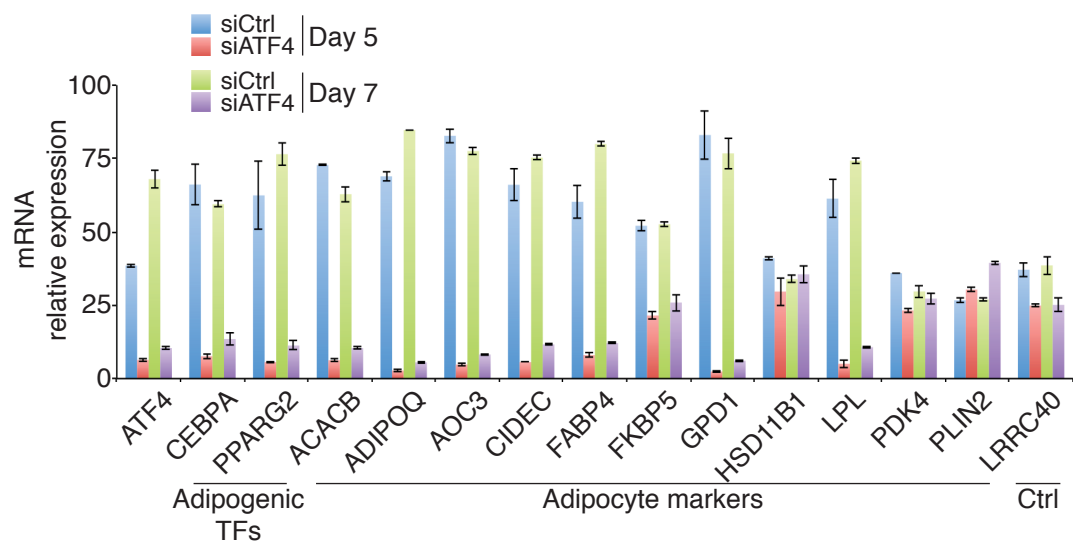

Supplement: supp [file elife-06821-supp-v2.zip]

Cohen et al., Figure 1-figure supplement 1

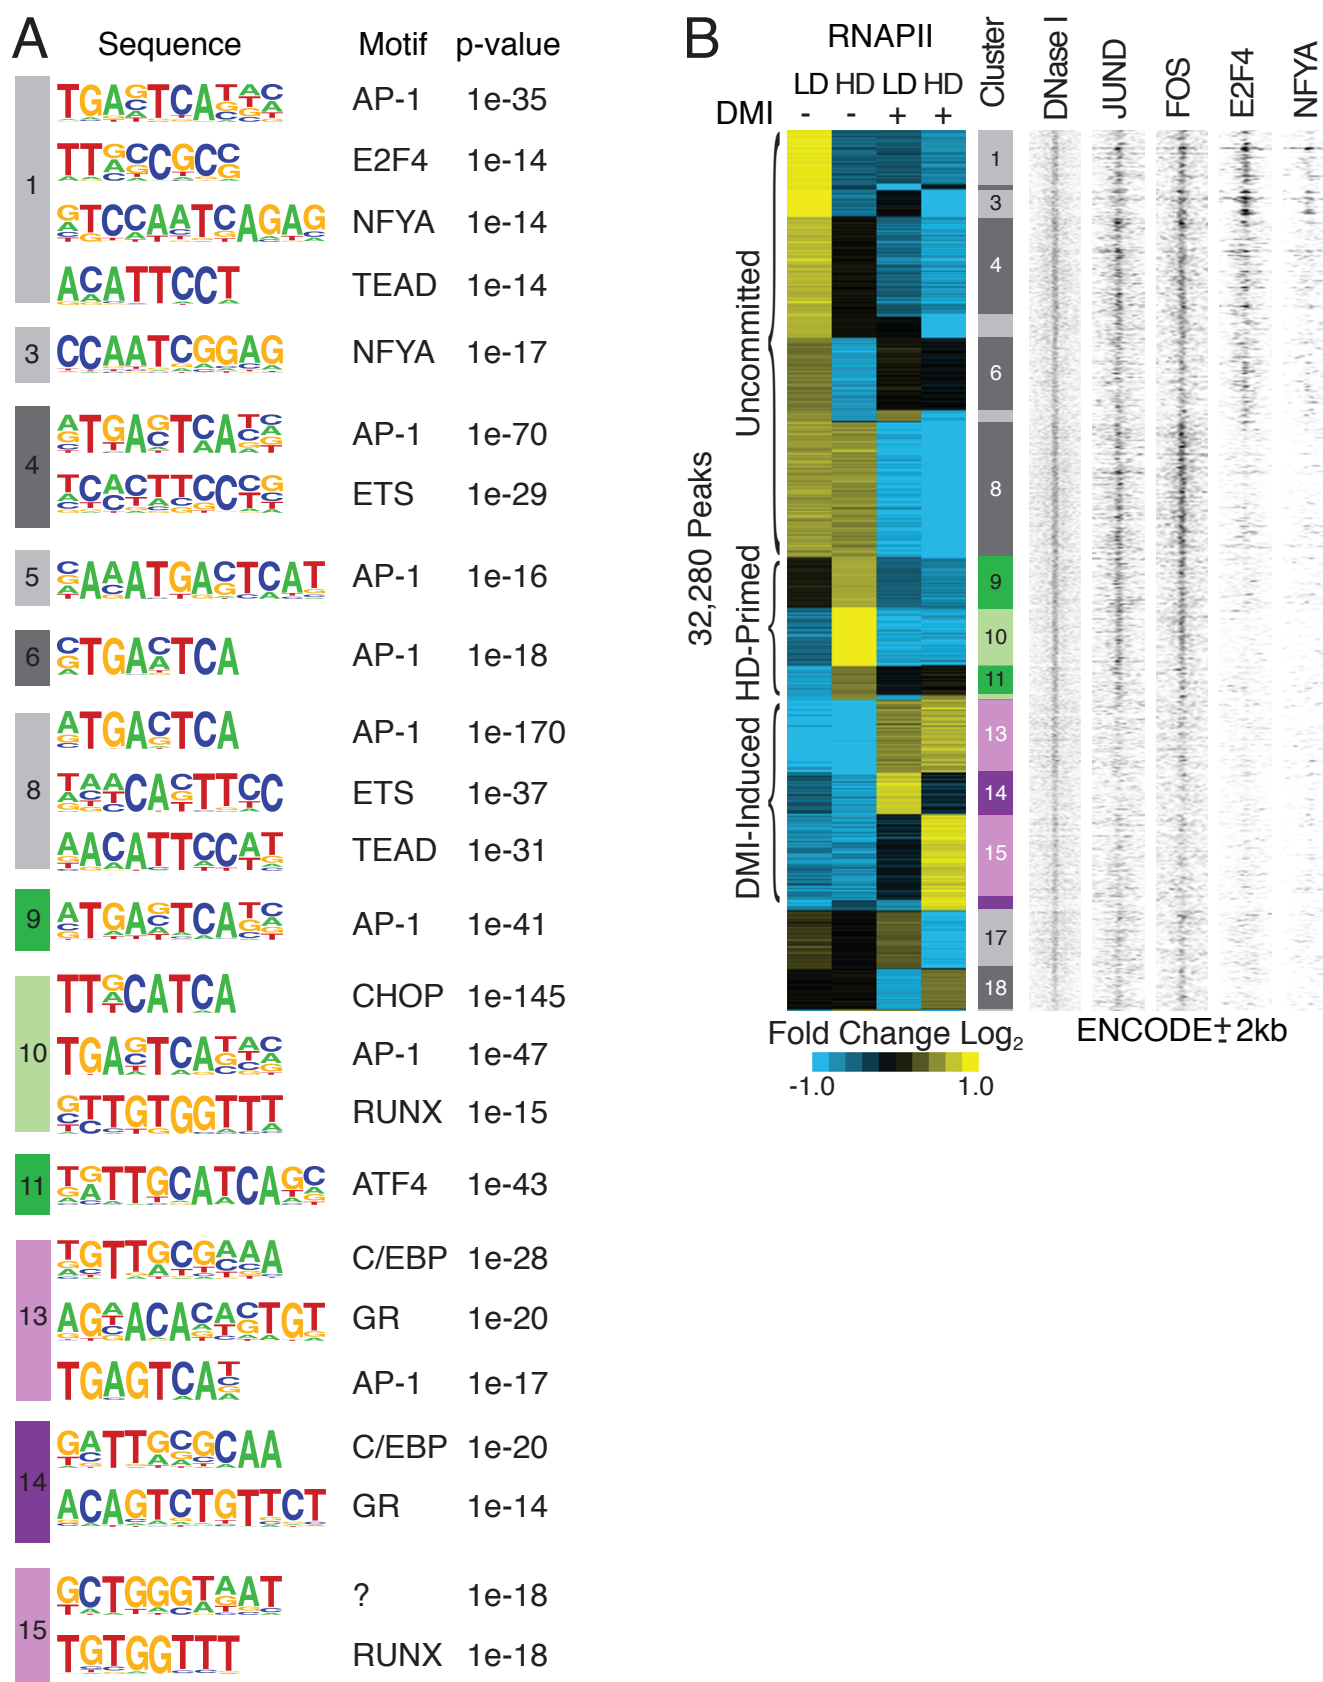

Supplement: supp [file elife-06821-supp-v2.zip]

# Cohen et al., Figure 5-figure supplement 1

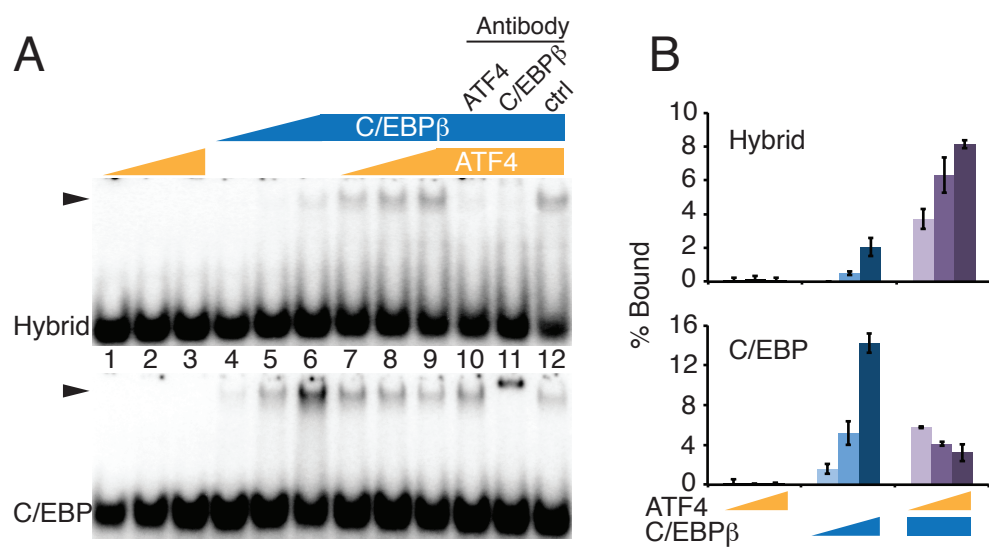

Supplement: supp [file elife-06821-supp-v2.zip]

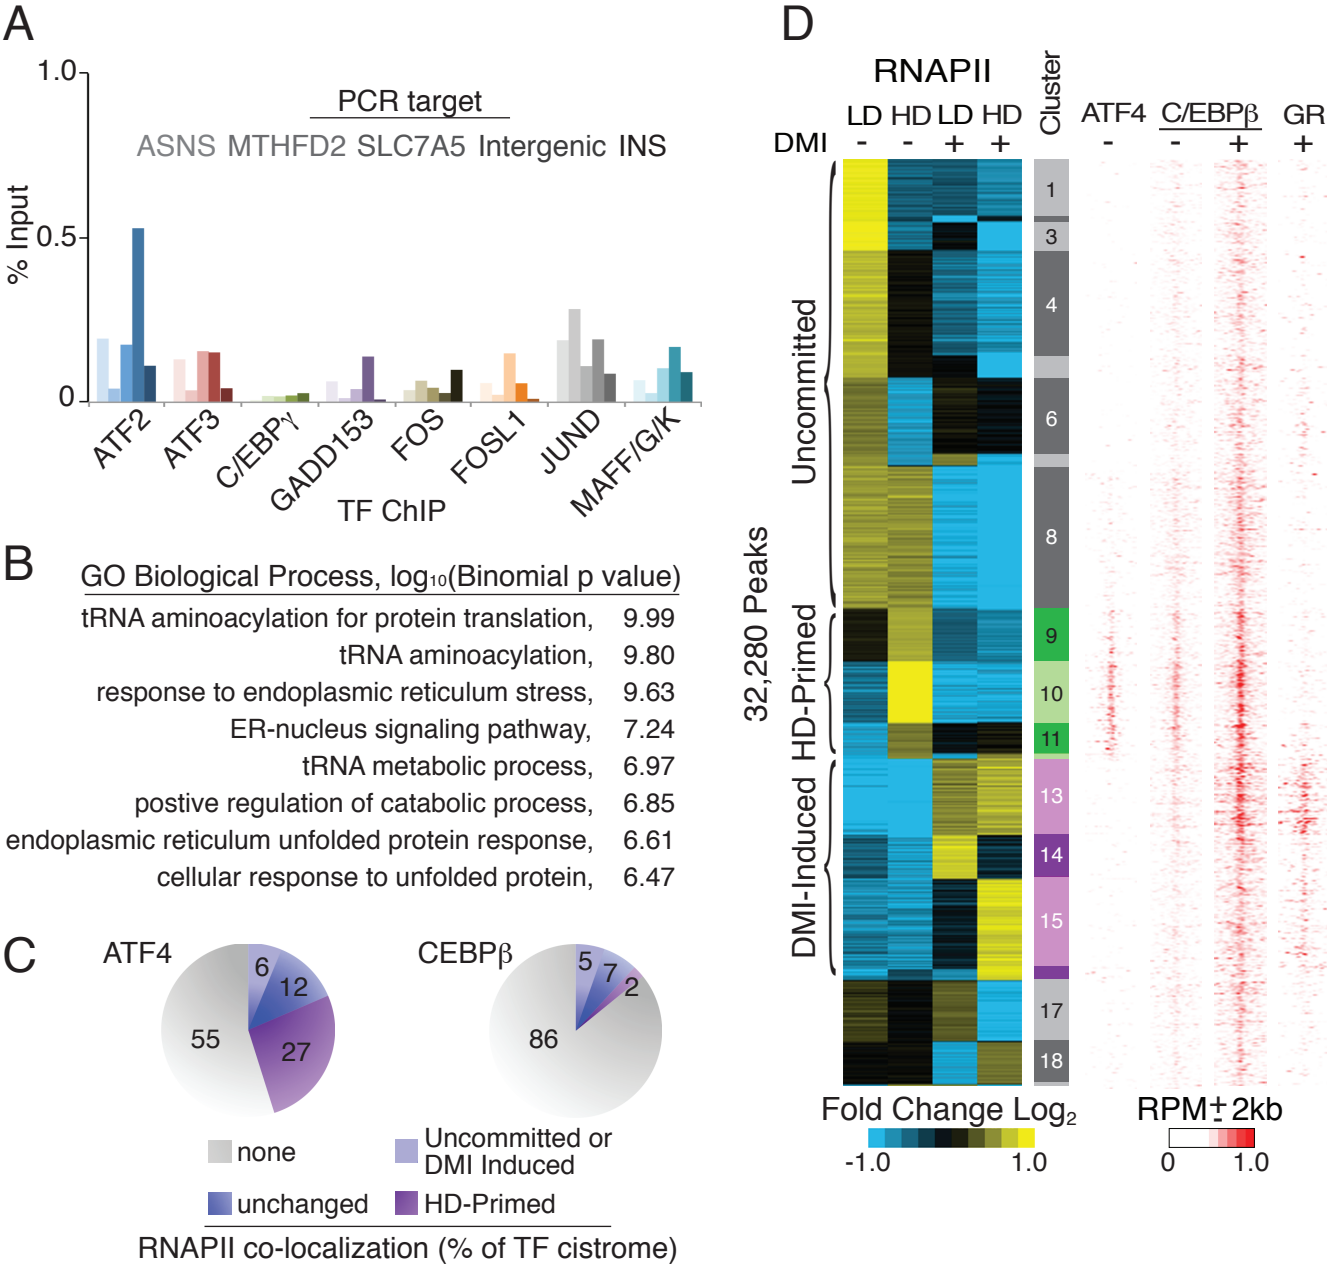

Supplement: supp [file elife-06821-supp-v2.zip]
